# Supplementary material for: Epigenetic marking of sperm by post-translational modification of histones and protamines
Source: PubMed Central journal article supplement (PMC3904194; doi:10.1186/1756-8935-7-2), 2014-01-20

Supplementary Figure 1 ABC, Brunner et al.

**A**

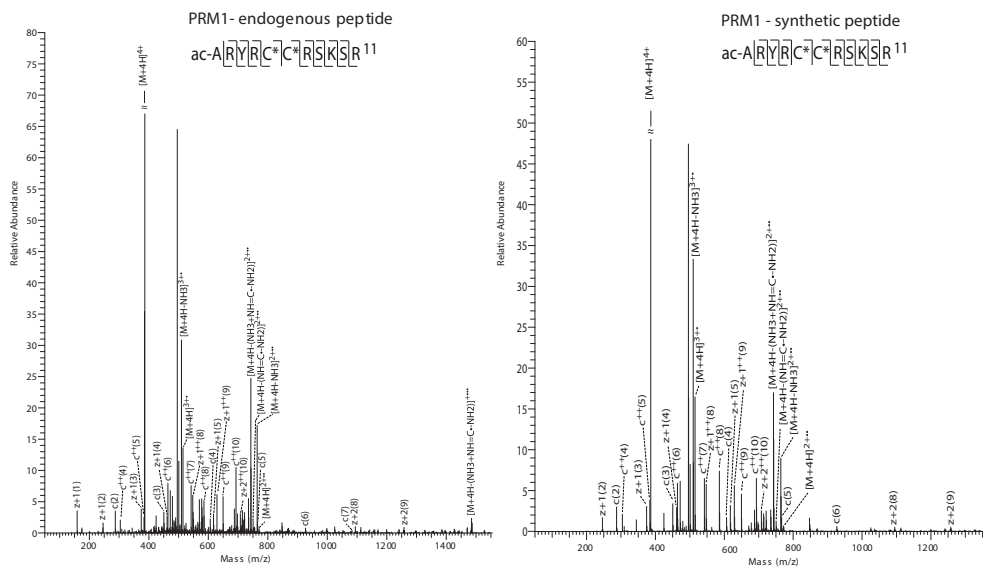

**B**

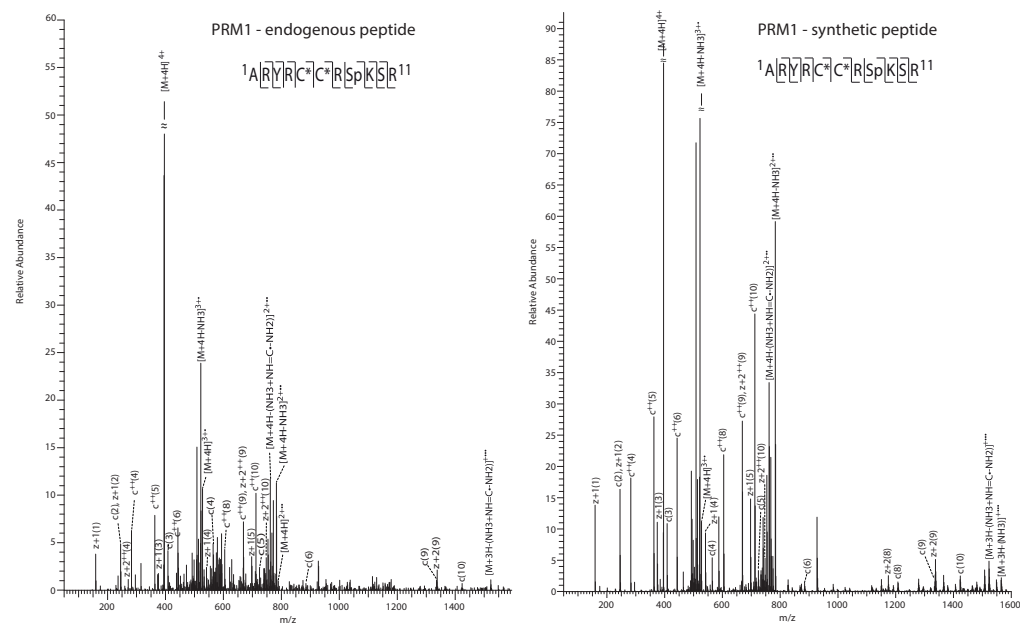

**C**

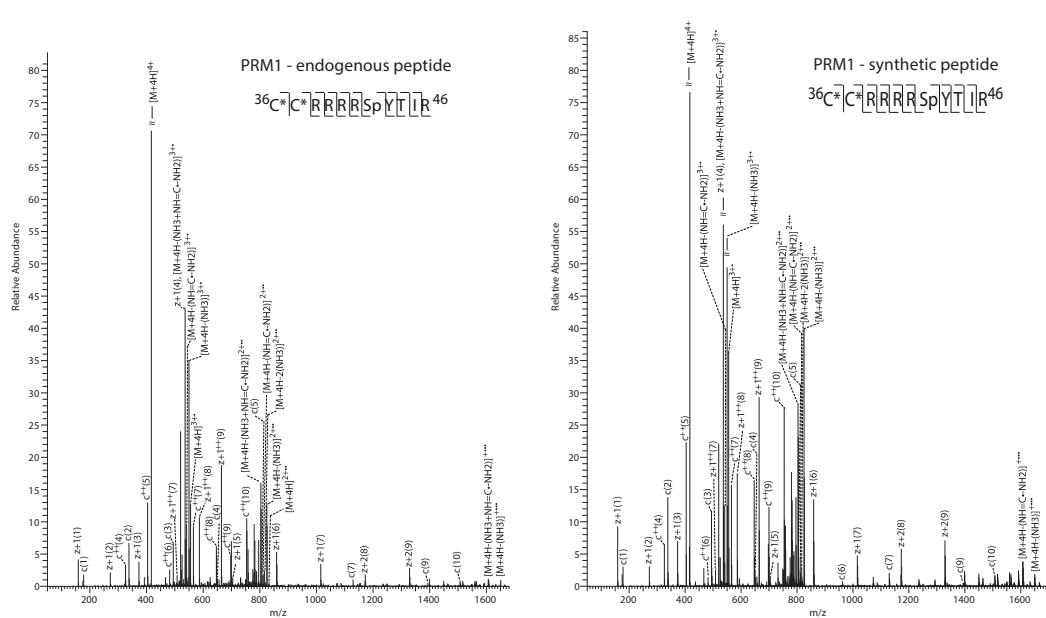

Supplementary Figure 1 DEF, Brunner et al.

D

PRM1 - endogenous peptide

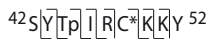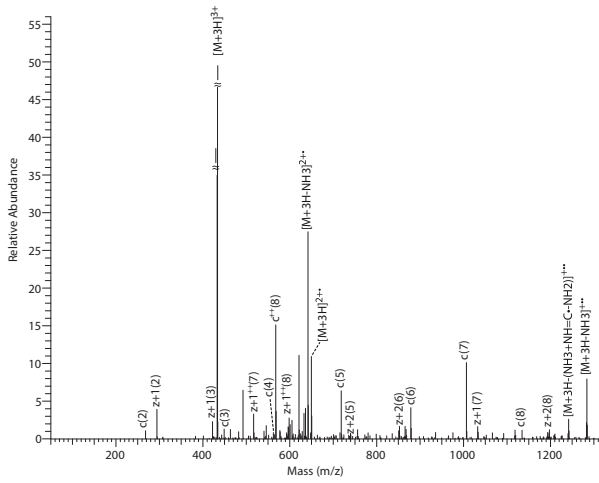

PRM1 - synthetic peptide

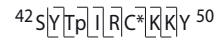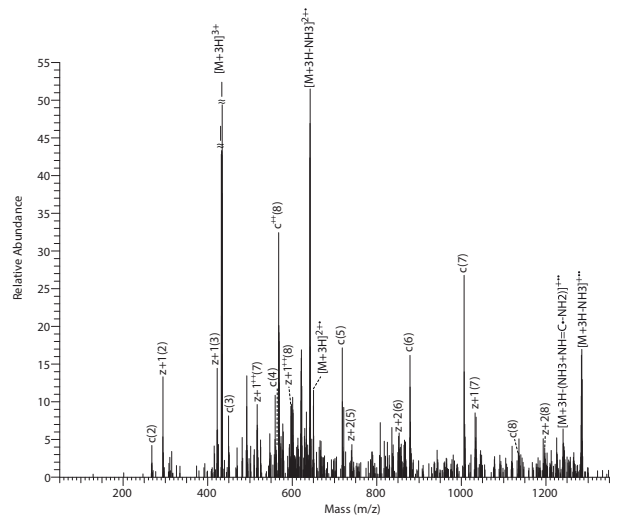

E

PRM1 - endogenous peptide

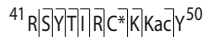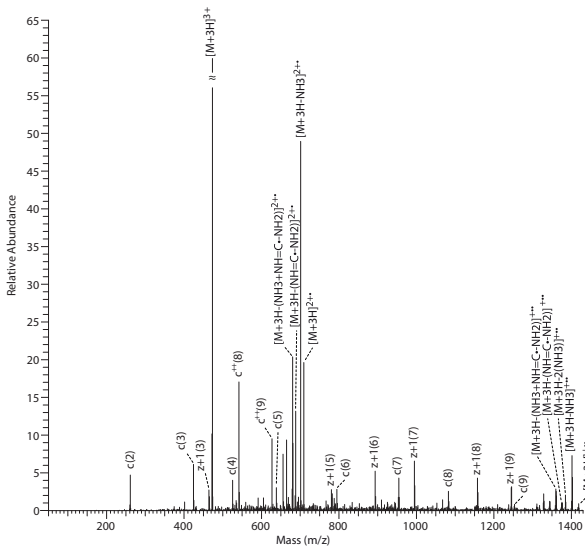

PRM1 - synthetic peptide

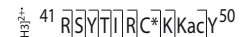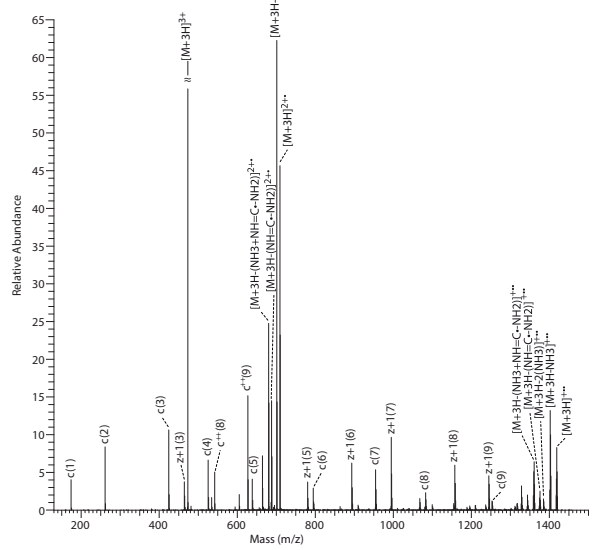

F

PRM2 - endogenous peptide

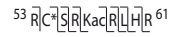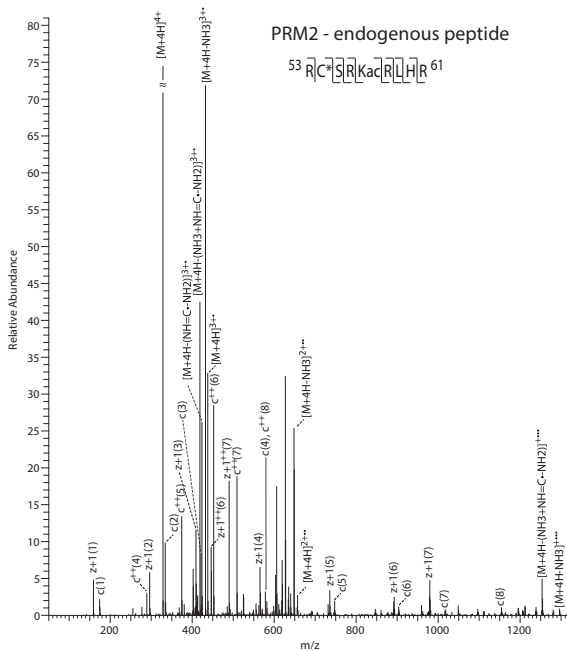

PRM2 - synthetic peptide

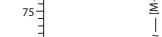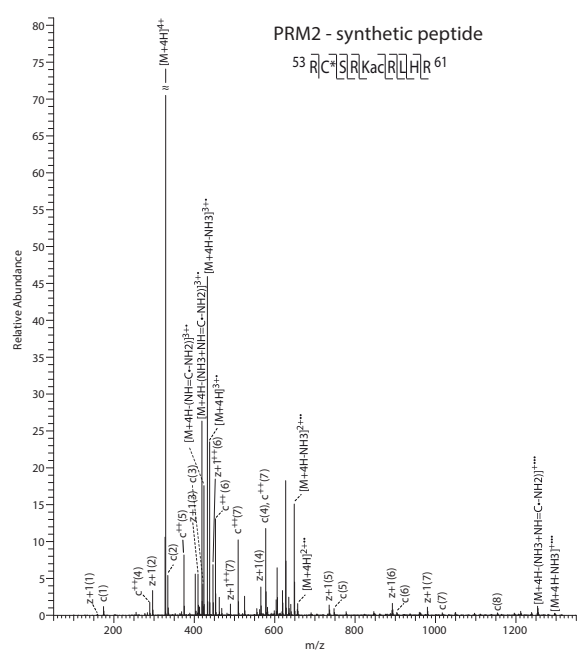

# Supplementary Figure 1 G, Brunner et al.

## G

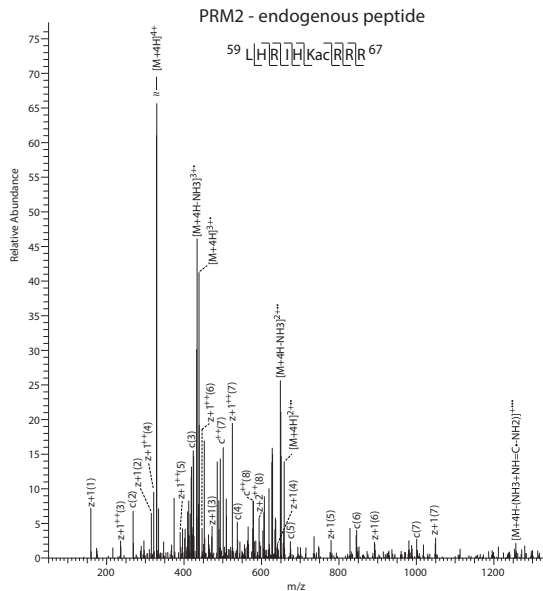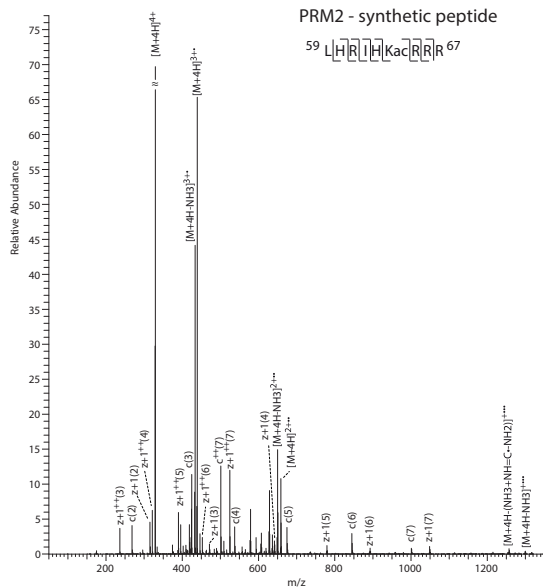

Supplement: 1756-8935-7-2-S4.pdf [file 1756-8935-7-2-S4.pdf]
