# Supplementary material for: Epigenetic marking of sperm by post-translational modification of histones and protamines
Source: PubMed Central journal article supplement (PMC3904194; doi:10.1186/1756-8935-7-2), 2014-01-20
Supplement: 1756-8935-7-2-S1.pdf [file 1756-8935-7-2-S1.pdf]

# Supplementary Figure 2, Brunner et al.

MS/MS Fragmentation of **SETAPAAPAAPAEKTPVKKKAR**  
 Found in **sp|P43274|H14\_MOUSE** in **fgcz\_10090**, Histone H1.4 OS=Mus musculus GN=Hist1h1e

Match to Query 3848: 2428.340216 from(608.092330,4+) intensity(257960.0000) scans(3555) rtinseconds(2051.5263) index(2238)  
 Title: 2239: Scan 3555 (rt=34.1921) [s:p749:Proteomics/ORBI\_2/andreamizzi\_20110517\_sperm\_trypsin\_GluC\_ETD\_CID/20110517\_01\_NaCl\_1.RAW]  
 Data file 20110517\_01\_NaCl\_1.mgf

Click mouse within plot area to zoom in by factor of two about that point  
 Or,  to  Da   
 Label all possible matches  Label matches used for scoring   
 Show Y-axis

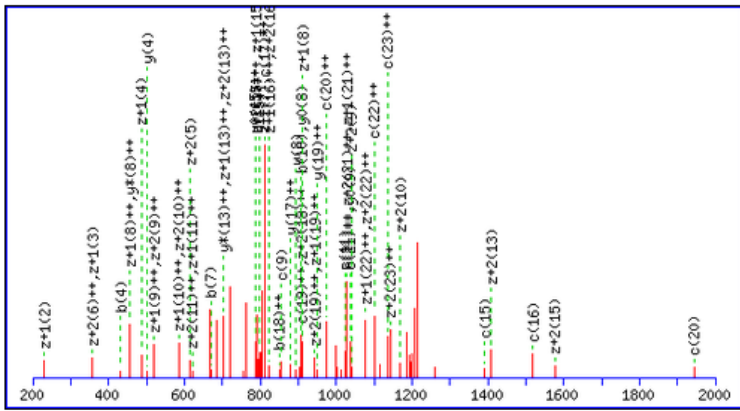

| #  | b         | b <sup>++</sup> | b <sup>+</sup> | b <sup>+++</sup> | b <sup>0</sup> | b <sup>0++</sup> | c         | c <sup>++</sup> | Seq | w         | w'        | y         | y <sup>++</sup> | y <sup>+</sup> | y <sup>+++</sup> | y <sup>0</sup> | y <sup>0++</sup> | z+1       | z+1 <sup>++</sup> | z+2       | z+2 <sup>++</sup> | #  |    |
|----|-----------|-----------------|----------------|------------------|----------------|------------------|-----------|-----------------|-----|-----------|-----------|-----------|-----------------|----------------|------------------|----------------|------------------|-----------|-------------------|-----------|-------------------|----|----|
| 1  | 130.0499  | 65.5286         |                |                  | 112.0393       | 56.5233          | 147.0764  | 74.0418         | S   |           |           |           |                 |                |                  |                |                  |           |                   |           |                   |    | 24 |
| 2  | 259.0925  | 130.0499        |                |                  | 241.0819       | 121.0446         | 276.1190  | 138.5631        | F   | 2225.2765 |           | 2300.3085 | 1105.6579       | 2283.2819      | 1142.1446        | 2282.2979      | 1141.6526        | 2284.2898 | 1142.6485         | 2285.2976 | 1143.1534         | 25 |    |
| 3  | 360.1401  | 180.5737        |                |                  | 342.1296       | 171.5884         | 377.1667  | 189.0870        | T   | 2138.2444 | 2140.2237 | 2171.2659 | 1086.1366       | 2154.2394      | 1077.6233        | 2153.2553      | 1077.1313        | 2155.2472 | 1078.1272         | 2156.2550 | 1078.6311         | 22 |    |
| 4  | 431.1773  | 216.0923        |                |                  | 413.1667       | 207.0870         | 448.2038  | 224.6055        | A   |           |           | 2070.2182 | 1035.6127       | 2053.1917      | 1027.0995        | 2052.2077      | 1026.6075        | 2054.1995 | 1027.6034         | 2055.2073 | 1028.1073         | 21 |    |
| 5  | 528.2300  | 264.6186        |                |                  | 510.2195       | 255.6134         | 545.2566  | 273.1319        | P   | 1956.1389 |           | 1999.1811 | 1000.9942       | 1982.1546      | 991.5809         | 1981.1705      | 991.0889         | 1983.1624 | 992.0848          | 1984.1702 | 992.5887          | 20 |    |
| 6  | 599.2671  | 300.1372        |                |                  | 581.2566       | 291.1319         | 616.2937  | 308.6505        | A   |           |           | 1902.1283 | 951.5678        | 1885.1018      | 943.0545         | 1884.1178      | 942.5625         | 1886.1096 | 943.5584          | 1887.1174 | 944.0624          | 19 |    |
| 7  | 670.3042  | 335.6558        |                |                  | 652.2937       | 326.6505         | 687.3308  | 344.1690        | A   |           |           | 1831.0912 | 916.0493        | 1814.0647      | 907.5360         | 1813.0807      | 907.0440         | 1815.0725 | 908.0399          | 1816.0835 | 908.5438          | 18 |    |
| 8  | 767.3570  | 384.1821        |                |                  | 749.3464       | 375.1769         | 784.3836  | 392.6954        | P   | 1717.0119 |           | 1760.0541 | 880.5307        | 1743.0276      | 872.0174         | 1742.0436      | 871.5254         | 1744.0354 | 872.5213          | 1745.0432 | 873.0252          | 17 |    |
| 9  | 838.3941  | 419.7007        |                |                  | 820.3836       | 410.6954         | 855.4207  | 428.2140        | A   |           |           | 1663.0014 | 832.0043        | 1645.9748      | 823.4910         | 1644.9908      | 822.9900         | 1646.9826 | 823.9950          | 1647.9903 | 824.9916          | 16 |    |
| 10 | 908.4312  | 455.2193        |                |                  | 891.4207       | 446.2140         | 926.4578  | 463.7325        | A   |           |           | 1591.9642 | 796.4838        | 1574.9377      | 787.9725         | 1573.9337      | 787.4805         | 1575.9455 | 788.4764          | 1576.9533 | 788.9893          | 15 |    |
| 11 | 1006.4840 | 503.7456        |                |                  | 988.4734       | 494.7404         | 1023.5106 | 512.2589        | P   | 1477.8849 |           | 1520.9271 | 760.9672        | 1503.9006      | 752.4539         | 1502.9166      | 751.9619         | 1504.9084 | 752.9578          | 1505.9162 | 753.4618          | 14 |    |
| 12 | 1077.5211 | 539.2642        |                |                  | 1059.5106      | 530.2589         | 1094.5477 | 547.7775        | A   |           |           | 1423.8744 | 712.4408        | 1406.8478      | 703.9275         | 1405.8638      | 703.4355         | 1407.8556 | 704.4315          | 1408.8635 | 704.9354          | 13 |    |
| 13 | 1174.5739 | 587.7906        |                |                  | 1156.5633      | 578.7853         | 1191.6004 | 596.3039        | P   | 1309.7950 |           | 1352.8372 | 676.9233        | 1335.8107      | 668.4090         | 1334.8267      | 667.9170         | 1336.8185 | 668.9129          | 1337.8263 | 669.4168          | 12 |    |
| 14 | 1245.6120 | 623.3091        |                |                  | 1227.6004      | 614.3039         | 1262.6375 | 631.8224        | A   |           |           | 1255.7845 | 628.3959        | 1238.7579      | 619.8826         | 1237.7739      | 619.3906         | 1239.7658 | 620.3865          | 1240.7736 | 620.8904          | 11 |    |
| 15 | 1374.6536 | 687.8304        |                |                  | 1356.6430      | 678.8251         | 1391.6801 | 696.3437        | F   | 1109.7153 |           | 1184.7474 | 592.8773        | 1167.7208      | 584.3640         | 1166.7368      | 583.8720         | 1168.7286 | 584.8680          | 1169.7365 | 585.3710          | 10 |    |
| 16 | 1502.7486 | 751.8779        | 1485.7220      | 743.3646         | 1484.7380      | 742.8726         | 1510.7751 | 760.3912        | K   | 981.6204  |           | 1055.7048 | 528.5560        | 1038.6782      | 519.8428         | 1037.6942      | 519.3507         | 1039.6861 | 520.3467          | 1040.6939 | 520.8506          | 9  |    |
| 17 | 1603.7902 | 802.4018        | 1586.7697      | 793.8885         | 1585.7857      | 793.3965         | 1620.8238 | 810.9150        | T   | 894.5883  | 896.5676  | 927.6098  | 464.3083        | 910.5833       | 455.7953         | 909.5992       | 455.3033         | 910.5911  | 456.2992          | 912.5989  | 456.8031          | 8  |    |
| 18 | 1700.8490 | 850.9281        | 1683.8224      | 842.4149         | 1682.8384      | 841.9229         | 1717.8755 | 839.4414        | P   | 783.5199  |           | 826.5621  | 413.7847        | 809.5356       | 405.2714         |                |                  | 810.5434  | 405.7753          | 811.5512  | 406.2793          | 7  |    |
| 19 | 1799.9174 | 900.4623        | 1782.8909      | 891.9491         | 1781.9068      | 891.4571         | 1816.9440 | 908.9756        | V   | 698.4672  |           | 729.5094  | 365.2583        | 712.4828       | 356.7450         |                |                  | 713.4006  | 357.2490          | 714.4085  | 357.7529          | 6  |    |
| 20 | 1928.0124 | 964.5098        | 1910.9858      | 955.9965         | 1910.0118      | 955.5045         | 1945.0389 | 973.0231        | K   | 556.3566  |           | 630.4410  | 315.7241        | 613.4144       | 307.2108         |                |                  | 614.4222  | 307.7148          | 615.4301  | 308.2187          | 5  |    |
| 21 | 2056.1073 | 1028.5573       | 2039.0808      | 1020.0440        | 2038.0968      | 1019.5520        | 2073.1339 | 1037.0796       | K   | 428.2616  |           | 502.3460  | 251.6766        | 485.3194       | 243.1634         |                |                  | 486.5273  | 243.6673          | 487.3351  | 244.1712          | 4  |    |
| 22 | 2184.2023 | 1092.6048       | 2167.1757      | 1084.0915        | 2166.1917      | 1083.3995        | 2201.2288 | 1101.1181       | K   | 300.1666  |           | 374.2510  | 187.6392        | 357.2245       | 179.5159         |                |                  | 358.2323  | 179.6198          | 359.2401  | 180.1237          | 3  |    |
| 23 | 2255.2394 | 1128.1293       | 2238.2129      | 1119.6101        | 2237.2288      | 1119.1181        | 2272.2660 | 1136.6366       | A   |           |           | 246.1561  | 123.5817        | 229.1295       | 115.0684         |                |                  | 230.1373  | 115.5723          | 231.1452  | 116.0762          | 2  |    |
| 24 |           |                 |                |                  |                |                  |           |                 | R   | 73.0284   |           | 175.1190  | 88.0631         | 158.0924       | 79.5498          |                |                  | 159.1002  | 80.0538           | 160.1081  | 80.5577           | 1  |    |

Monoisotopic mass of neutral peptide Mr(calc): 2428.3437  
 Fixed modifications: Carbamidomethyl (C) (apply to specified residues or termini only)  
 Variable modifications:  
 S1 : Acetyl\_STY (STY)  
 Ions Score: 70 Expect: 2.7e-05  
 Matches : 58/387 fragment ions using 61 most intense peaks ([help](#))

## Mascot Search Results: Peptide View

(ac-S)ETAPAAPAAPAEKTPVKKKAR

MS/MS Fragmentation of **LLLPGELAKHAVSEGTKAVTK**

Found in **sp|P70696|H2B1A\_MOUSE** in **fgcz\_10090**, Histone H2B type 1-A OS=Mus musculus GN=Hist1h2ba

Match to Query 3867: 2325.306220 from(466.068520,5+) intensity(69789.6330) scans(5938) rtinseconds(3109.7809) index(4186)

Title: 4187: Scan 5938 (rt=51.8297) [s:\p749\Proteomics\ORBI\_2\andreamizzi\_20110517\_sperm\_trypsin\_GluC\_ETD\_CID\20110517\_02\_NaCl\_2.RAW]

Data file 20110517\_02\_NaCl\_2.mgf

Click mouse within plot area to zoom in by factor of two about that point

Or,  to  Da

Label all possible matches  Label matches used for scoring

Show Y-axis

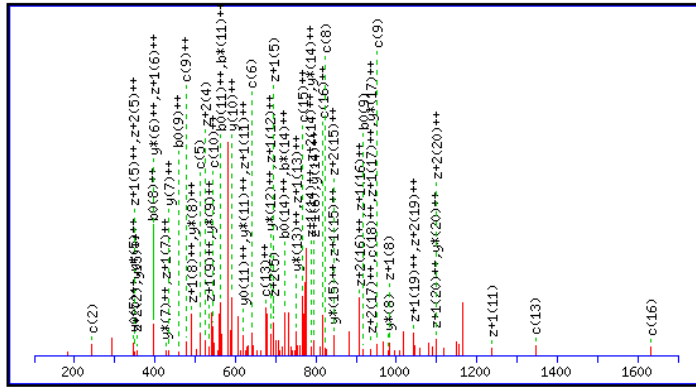

| #  | b         | b <sup>++</sup> | b <sup>*</sup> | b <sup>+++</sup> | b <sup>0</sup>  | b <sup>0++</sup> | c                | c <sup>*</sup>  | Seq.    | w         | w'       | y         | y <sup>++</sup> | y <sup>*</sup>  | y <sup>+++</sup> | y <sup>0</sup> | y <sup>0++</sup> | z+1             | z+1 <sup>++</sup> | z+2             | z+2 <sup>++</sup> | #         |    |
|----|-----------|-----------------|----------------|------------------|-----------------|------------------|------------------|-----------------|---------|-----------|----------|-----------|-----------------|-----------------|------------------|----------------|------------------|-----------------|-------------------|-----------------|-------------------|-----------|----|
| 1  | 114.0913  | 57.5493         |                |                  |                 |                  |                  | 131.1179        | 66.0626 | L         |          |           |                 |                 |                  |                |                  |                 |                   |                 |                   |           | 21 |
| 2  | 227.1754  | 114.0913        |                |                  |                 |                  | <b>244.2020</b>  | 122.6046        | L       | 2154.1570 |          | 2213.2305 | 1107.1189       | 2196.2039       | <b>1098.6056</b> | 2195.2199      | 1098.1136        | 2197.2118       | <b>1099.1095</b>  | 2198.2196       | <b>1099.6134</b>  | <b>20</b> |    |
| 3  | 340.2595  | 170.6334        |                |                  |                 |                  | 357.2860         | 179.1466        | L       | 2041.0729 |          | 2100.1464 | 1050.5769       | 2083.1199       | 1042.0636        | 2082.1359      | 1041.5716        | 2084.1277       | <b>1042.5675</b>  | 2085.1355       | <b>1043.0714</b>  | <b>19</b> |    |
| 4  | 437.3122  | 219.1598        |                |                  |                 |                  | 454.3388         | 227.6730        | P       | 1944.0202 |          | 1987.0624 | 994.0348        | 1970.0358       | 985.5215         | 1969.0518      | 1971.0436        | 986.0255        | 1972.0515         | 986.5294        | 986.5294          | <b>18</b> |    |
| 5  | 494.3337  | 247.6705        |                |                  |                 |                  | <b>511.3602</b>  | 256.1838        | G       |           |          | 1890.0096 | 945.5084        | 1872.9831       | <b>969.9952</b>  | 1871.9990      | 936.5032         | 1873.9909       | <b>937.4991</b>   | 1874.9987       | <b>938.0000</b>   | <b>17</b> |    |
| 6  | 623.3763  | 312.1918        |                |                  | 605.3657        | 303.1865         | <b>640.4028</b>  | 320.7051        | E       | 1757.9561 |          | 1832.9881 | 916.9977        | 1815.9616       | 908.4844         | 1814.9776      | 907.9924         | 1816.9694       | <b>908.9883</b>   | 1817.9772       | <b>909.4923</b>   | <b>16</b> |    |
| 7  | 736.4604  | 368.7338        |                |                  | 718.4498        | 359.7285         | 753.4869         | 377.2471        | L       | 1644.8721 |          | 1703.9456 | 852.4764        | 1686.9190       | <b>843.9631</b>  | 1685.9350      | 843.4711         | 1687.9268       | <b>844.4671</b>   | 1688.9347       | <b>844.9710</b>   | <b>15</b> |    |
| 8  | 807.4975  | 404.2524        |                |                  | 789.4869        | 395.2471         | <b>824.5240</b>  | 412.7656        | A       |           |          | 1590.8615 | 795.9344        | 1573.8349       | <b>787.4211</b>  | 1572.8509      | 786.9291         | 1574.8428       | <b>787.9250</b>   | 1575.8506       | <b>788.4289</b>   | <b>14</b> |    |
| 9  | 935.5924  | 468.2999        | 918.5659       | 459.7866         | <b>917.5819</b> | 459.2946         | <b>952.6190</b>  | <b>476.8131</b> | K       | 1445.7400 |          | 1519.8244 | 760.4158        | 1502.7978       | <b>751.9025</b>  | 1501.8138      | 751.4105         | 1503.8056       | <b>752.4065</b>   | 1504.8135       | 752.9104          | <b>13</b> |    |
| 10 | 1072.6513 | 536.8293        | 1055.6248      | 528.3160         | 1054.6408       | 527.8240         | 1089.6779        | <b>545.3426</b> | H       |           |          | 1391.7294 | 696.3683        | 1374.7029       | <b>687.8551</b>  | 1373.7188      | 687.3631         | 1375.7107       | <b>688.3590</b>   | 1376.7185       | 688.8629          | <b>12</b> |    |
| 11 | 1143.6885 | 572.3479        | 1126.6619      | <b>563.8346</b>  | 1125.6779       | <b>563.3426</b>  | 1160.7150        | 580.8611        | A       |           |          | 1254.6705 | 627.8389        | 1237.6439       | <b>619.3256</b>  | 1236.6599      | <b>618.8336</b>  | <b>619.8295</b> | 1239.6596         | 620.3334        | 620.3334          | <b>11</b> |    |
| 12 | 1242.7569 | 621.8821        | 1225.7303      | 613.3688         | 1224.7463       | 612.8768         | 1259.7834        | 630.3953        | V       | 1152.5912 |          | 1183.6334 | <b>592.3203</b> | 1166.6068       | 583.8071         | 1165.6228      | 583.3150         | 1167.6147       | 584.3110          | 1168.6225       | 584.8149          | <b>10</b> |    |
| 13 | 1329.7889 | 665.3981        | 1312.7623      | 656.8848         | 1311.7783       | 656.3928         | <b>1346.8154</b> | <b>673.9114</b> | S       | 1051.5435 |          | 1084.5650 | 542.7861        | 1067.5384       | <b>534.2728</b>  | 1066.5544      | 533.7808         | 1068.5462       | <b>534.7768</b>   | 1069.5541       | 535.2807          | <b>9</b>  |    |
| 14 | 1458.8315 | 729.9194        | 1441.8049      | <b>721.4061</b>  | 1440.8209       | <b>720.9141</b>  | 1475.8580        | 738.4327        | E       | 922.5009  |          | 997.5329  | 499.2701        | <b>980.5064</b> | <b>490.7568</b>  | 979.5224       | 490.2648         | <b>981.5142</b> | <b>491.2607</b>   | 982.5220        | 491.7647          | <b>8</b>  |    |
| 15 | 1515.8530 | 758.9301        | 1498.8264      | 749.9168         | 1497.8424       | 749.4248         | 1532.8795        | <b>766.9434</b> | G       |           |          | 868.4903  | 434.7488        | 851.4638        | <b>426.2355</b>  | 850.4798       | 425.7435         | 852.4716        | <b>426.7395</b>   | 853.4794        | 427.7324          | <b>7</b>  |    |
| 16 | 1616.9006 | 808.9540        | 1599.8741      | 800.4407         | 1598.8901       | 799.9487         | <b>1633.9272</b> | <b>817.4672</b> | T       | 778.4474  | 780.4267 | 811.4689  | 406.2381        | 794.4423        | <b>397.7425</b>  | 793.4583       | 397.2328         | <b>795.4502</b> | <b>398.2287</b>   | 796.4580        | 398.7326          | <b>6</b>  |    |
| 17 | 1787.0425 | 894.0249        | 1770.0160      | 885.5116         | 1769.0320       | 885.0196         | 1804.0691        | 902.5382        | K       | 594.2899  |          | 710.4212  | <b>355.7142</b> | 693.3947        | <b>347.2010</b>  | 692.4106       | <b>346.7090</b>  | <b>694.4025</b> | <b>347.7049</b>   | <b>695.4103</b> | <b>348.2088</b>   | <b>5</b>  |    |
| 18 | 1858.0797 | 929.5435        | 1841.0531      | 921.0302         | 1840.0691       | 920.5382         | 1875.1062        | <b>938.0567</b> | A       |           |          | 540.2793  | 270.6433        | 523.2527        | 262.1300         | 522.2687       | 261.6380         | 524.2666        | 262.6339          | <b>525.2684</b> | 263.1378          | <b>4</b>  |    |
| 19 | 1957.1481 | 979.0777        | 1940.1215      | 970.5644         | 1939.1375       | 970.0724         | 1974.1746        | 987.5910        | V       | 438.2000  |          | 469.2422  | 235.1247        | 452.2156        | 226.6115         | 451.2316       | 226.1194         | 453.2235        | 227.1154          | 454.2313        | 227.6193          | <b>3</b>  |    |
| 20 | 2138.1621 | 1069.5847       | 2121.1355      | 1061.0714        | 2120.1515       | 1060.5794        | 2155.1886        | 1078.0980       | T       | 257.1860  | 259.1652 | 370.1738  | 185.5905        | 353.1472        | 177.0772         | 352.1632       | 176.5852         | 354.1550        | 177.5812          | <b>355.1629</b> | 178.0851          | <b>2</b>  |    |
| 21 |           |                 |                |                  |                 |                  |                  |                 | K       | 73.0284   |          | 189.1598  | 95.0835         | 172.1332        | 86.5702          |                |                  | 173.1410        | 87.0742           | 174.1489        | 87.5781           | <b>1</b>  |    |

Monoisotopic mass of neutral peptide Mr(calc): 2325.3073

Fixed modifications: Carbamidomethyl (C) (apply to specified residues or termini only)

Variable modifications:

K17 : Trimethyl (K)

T20 : Phospho\_STY (STY)

K21 : Trimethyl (K)

Ions Score: 74 Expect: 0.00017

Matches : 67/348 fragment ions using 77 most intense peaks ([help](#))

# Mascot Search Results: Peptide View

LLLPGELAKHAVSEGTKme3AVpTKme3

MS/MS Fragmentation of **PEVAVKGATISKK**

Found in **sp|P70696|H2B1A\_MOUSE** in **fgcz\_10090**, Histone H2B type 1-A OS=Mus musculus GN=Hist1h2ba

Match to Query 1680: 1406.749602 from(469.923810,3+) intensity(14895.2300) scans(3553) rtinseconds(2184.8056) index(2146)

Title: 2147: Scan 3553 (rt=36.4134) [s:p749\Proteomics\ORBI\_2\andreamizzi\_20110517\_sperm\_trypsin\_GluC\_ETD\_CID\20110517\_05\_swimup\_NaCl\_1.RAW]

Data file 20110517\_05\_swimup\_NaCl\_1.mgf

Click mouse within plot area to zoom in by factor of two about that point

Or, Plot from  to  Da

Label all possible matches  Label matches used for scoring

Show Y-axis

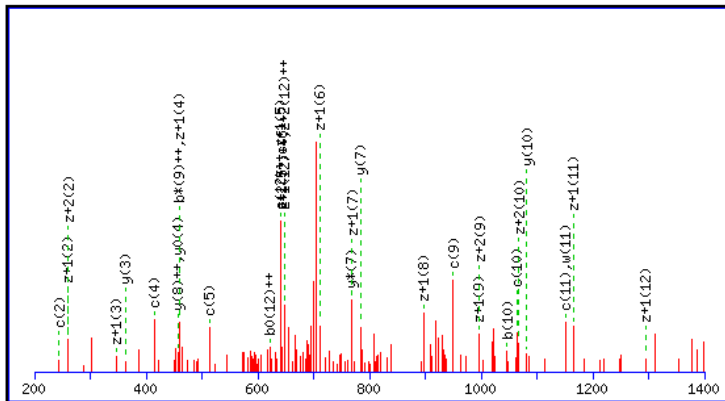

| #  | b                | b <sup>++</sup> | b <sup>*</sup> | b <sup>+++</sup> | b <sup>0</sup> | b <sup>0++</sup> | c                | c <sup>++</sup> | Seq. | w                | w'       | y                | y <sup>++</sup> | y <sup>*</sup>  | y <sup>+++</sup> | y <sup>0</sup>  | y <sup>0++</sup> | z+1              | z+1 <sup>++</sup> | z+2              | z+2 <sup>++</sup> | #         |    |
|----|------------------|-----------------|----------------|------------------|----------------|------------------|------------------|-----------------|------|------------------|----------|------------------|-----------------|-----------------|------------------|-----------------|------------------|------------------|-------------------|------------------|-------------------|-----------|----|
| 1  | 98.0600          | 49.5337         |                |                  |                |                  | 115.0866         | 58.0469         | P    |                  |          |                  |                 |                 |                  |                 |                  |                  |                   |                  |                   |           | 13 |
| 2  | 227.1026         | 114.0550        |                |                  | 209.0921       | 105.0497         | <b>244.1292</b>  | 122.5682        | E    | 1235.6759        |          | 1310.7079        | 655.8576        | 1293.6814       | 647.3443         | 1292.6974       | 646.8523         | <b>1294.6892</b> | <b>647.8482</b>   | 1295.6970        | <b>648.5522</b>   | <b>12</b> |    |
| 3  | 326.1710         | 163.5892        |                |                  | 308.1605       | 154.5839         | 343.1976         | 172.1024        | V    | <b>1150.6232</b> |          | 1181.6654        | 591.3363        | 1164.6388       | 582.8230         | 1163.6548       | 582.3310         | <b>1165.6466</b> | 583.3270          | 1166.6545        | 583.8309          | <b>11</b> |    |
| 4  | 397.2082         | 199.1077        |                |                  | 379.1976       | 190.1024         | <b>414.2347</b>  | 207.6210        | A    |                  |          | <b>1082.5969</b> | 541.8021        | 1065.5704       | 533.2888         | 1064.5864       | 532.7968         | 1066.5782        | 533.7927          | <b>1067.5860</b> | 534.2967          | <b>10</b> |    |
| 5  | 496.2766         | 248.6419        |                |                  | 478.2660       | 239.6366         | <b>513.3031</b>  | 257.1552        | V    | 980.5176         |          | 1011.5598        | 506.2836        | 994.5333        | 497.7703         | 993.5493        | 497.2783         | <b>995.5411</b>  | 498.2742          | <b>996.5489</b>  | 498.7781          | <b>9</b>  |    |
| 6  | 624.3715         | 312.6894        | 607.3450       | 304.1761         | 606.3610       | 303.6841         | <b>641.3981</b>  | 321.2027        | K    | 838.4070         |          | 912.4914         | <b>456.7493</b> | 895.4649        | 448.2361         | 894.4808        | 447.7441         | <b>896.4727</b>  | 448.7400          | 897.4805         | 449.2439          | <b>8</b>  |    |
| 7  | 681.3930         | 341.2001        | 664.3665       | 332.6869         | 663.3824       | 332.1949         | 698.4196         | 349.7134        | G    |                  |          | <b>784.3964</b>  | 392.7019        | <b>767.3699</b> | 384.1886         | 766.3859        | 383.6966         | <b>768.3777</b>  | 384.6925          | 769.3855         | 385.1964          | <b>7</b>  |    |
| 8  | 752.4301         | 376.7187        | 735.4036       | 368.2054         | 734.4196       | 367.7134         | 769.4567         | 385.2320        | A    |                  |          | 727.3750         | 364.1911        | 710.3484        | 355.6779         | 709.3644        | 355.1858         | <b>711.3563</b>  | 356.1818          | 712.3641         | 356.6857          | <b>6</b>  |    |
| 9  | 933.4441         | 467.2257        | 916.4176       | <b>458.7124</b>  | 915.4336       | 458.2204         | <b>950.4707</b>  | 475.7390        | T    | 543.3501         | 545.3293 | 656.3379         | 328.6726        | 639.3113        | 320.1593         | 638.3273        | 319.6673         | <b>640.3191</b>  | 320.6632          | <b>641.3270</b>  | 321.1671          | <b>5</b>  |    |
| 10 | <b>1046.5282</b> | 523.7677        | 1029.5016      | 515.2545         | 1028.5176      | 514.7625         | <b>1063.5547</b> | 532.2810        | I    | 430.2660         | 444.2817 | 475.3239         | 238.1656        | 458.2973        | 229.6523         | <b>457.3133</b> | 229.1603         | <b>459.3051</b>  | 230.1562          | 460.3130         | 230.6601          | <b>4</b>  |    |
| 11 | 1133.5602        | 567.2837        | 1116.5337      | 558.7705         | 1115.5497      | 558.2785         | <b>1150.5868</b> | 575.7970        | S    | 329.2183         |          | <b>362.2398</b>  | 181.6235        | 345.2132        | 173.1103         | 344.2292        | 172.6183         | <b>346.2211</b>  | 173.6142          | 347.2289         | 174.1181          | <b>3</b>  |    |
| 12 | 1261.6552        | 631.3312        | 1244.6286      | 622.8180         | 1243.6446      | <b>622.3259</b>  | 1278.6817        | <b>639.8445</b> | K    | 201.1234         |          | 275.2078         | 138.1075        | 258.1812        | 129.5942         |                 |                  | <b>259.1890</b>  | 130.0982          | <b>260.1969</b>  | 130.6021          | <b>2</b>  |    |
| 13 |                  |                 |                |                  |                |                  |                  |                 | K    | 73.0284          |          | 147.1128         | 74.0600         | 130.0863        | 65.5468          |                 |                  | 131.0941         | 66.5057           | 132.1019         | 66.5546           | <b>1</b>  |    |

Monoisotopic mass of neutral peptide Mr(calc): 1406.7534

Fixed modifications: Carbamidomethyl (C) (apply to specified residues or termini only)

Variable modifications:

T9 : Phospho\_STY (STY)

Ions Score: 54 Expect: 0.0034

Matches : 34/211 fragment ions using 58 most intense peaks ([help](#))

# Mascot Search Results: Peptide View

PEVAVKGApTISKK

MS/MS Fragmentation of **PEVAVKGATISKKGF**

Found in **sp|P70696|H2B1A\_MOUSE** in **fgcz\_10090**, Histone H2B type 1-A OS=Mus musculus GN=Hist1h2ba

Match to Query 5144: 1610.843256 from(403.718090,4+) intensity(10058.1250) scans(3030) rtseconds(2446.7592) index(8592)

Title: 944: Scan 3030 (rt=40.7793) [s:\p749\Proteomics\ORBI\_2\andreamizzi\_20110310\_sperm\_trypsin\_chymo\_AspN\_ETD\_CID\20110311\_44\_NaCl\_chymotrypsin\_SCX\_4.RAW]

Data file Y:\p749\Proteomics\Mascot\mgf53\_20110426\_sperm\_rerun\_chymotrypsin\_2nd\_ETD\_run\_NaCl\_SCX\mascot\_daemon\_merge.mgf

Click mouse within plot area to zoom in by factor of two about that point

Or,  to  Da

Label all possible matches  Label matches used for scoring

Show Y-axis

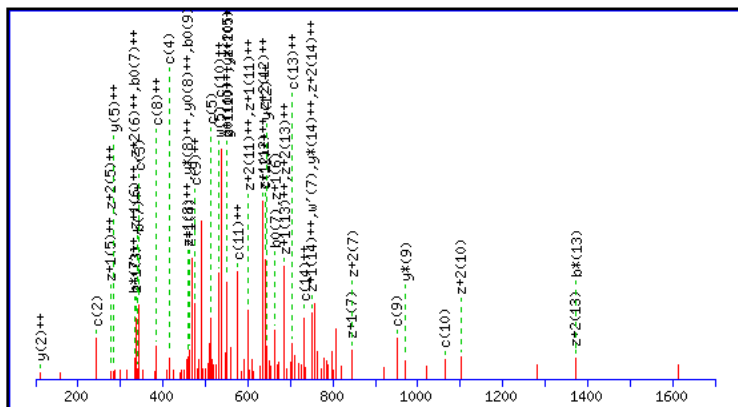

| #  | b         | b <sup>++</sup> | b <sup>+</sup>   | b <sup>+++</sup> | b <sup>0</sup>  | b <sup>0++</sup> | c                | c <sup>++</sup> | Seq. | w               | w'              | y         | y <sup>++</sup> | y <sup>+</sup>  | y <sup>+++</sup> | y <sup>0</sup> | y <sup>0++</sup> | z+1             | z+1 <sup>++</sup> | z+2              | z+2 <sup>++</sup> | #  |    |
|----|-----------|-----------------|------------------|------------------|-----------------|------------------|------------------|-----------------|------|-----------------|-----------------|-----------|-----------------|-----------------|------------------|----------------|------------------|-----------------|-------------------|------------------|-------------------|----|----|
| 1  | 98.0600   | 49.5337         |                  |                  |                 |                  | 115.0866         | 58.0469         | P    |                 |                 |           |                 |                 |                  |                |                  |                 |                   |                  |                   |    | 15 |
| 2  | 227.1026  | 114.0550        |                  |                  | 209.0921        | 105.0497         | <b>244.1292</b>  | 122.5682        | E    | 1439.7658       |                 | 1514.7978 | 757.9025        | 1497.7713       | <b>749.3893</b>  | 1496.7873      | 748.8973         | 1498.7791       | <b>749.8932</b>   | 1499.7869        | <b>750.3971</b>   | 14 |    |
| 3  | 326.1710  | 163.5892        |                  |                  | 308.1605        | 154.5839         | <b>343.1976</b>  | 172.1024        | V    | 1354.7130       |                 | 1385.7552 | 693.3813        | 1368.7287       | 684.8680         | 1367.7447      | 684.3760         | 1369.7365       | <b>685.3719</b>   | <b>1370.7443</b> | <b>685.8758</b>   | 13 |    |
| 4  | 397.2082  | 199.1077        |                  |                  | 379.1976        | 190.1024         | <b>414.2347</b>  | 207.6210        | A    |                 |                 | 1286.6868 | <b>643.8470</b> | 1269.6603       | 635.3338         | 1268.6763      | 634.8418         | 1270.6681       | <b>635.8377</b>   | 1271.6759        | <b>636.3416</b>   | 12 |    |
| 5  | 496.2766  | 248.6419        |                  |                  | 478.2660        | 239.6366         | <b>513.3031</b>  | 257.1552        | V    | 1184.6075       |                 | 1215.6497 | 608.3285        | 1198.6232       | 599.8152         | 1197.6391      | 599.3232         | 1199.6310       | <b>600.3191</b>   | 1200.6388        | <b>600.8230</b>   | 11 |    |
| 6  | 624.3715  | 312.6894        | 607.3450         | 304.1761         | 606.3610        | 303.6841         | 641.3981         | 321.2027        | K    | 1042.4969       |                 | 1116.5813 | 558.7943        | 1099.5547       | <b>550.2810</b>  | 1098.5707      | <b>549.7890</b>  | 1100.5626       | <b>550.7849</b>   | <b>1101.5704</b> | <b>551.2888</b>   | 10 |    |
| 7  | 681.3930  | <b>341.2001</b> | 664.3665         | <b>332.6869</b>  | <b>663.3824</b> | <b>332.1949</b>  | 698.4196         | 349.7134        | G    |                 |                 | 988.4863  | 494.7468        | <b>971.4598</b> | 486.2335         | 970.4758       | 485.7415         | 972.4676        | 486.7374          | 973.4754         | 487.2414          | 9  |    |
| 8  | 752.4301  | 376.7187        | 735.4036         | 368.2054         | 734.4196        | 367.7134         | 769.4567         | <b>385.2320</b> | A    |                 |                 | 931.4649  | 466.2361        | 914.4383        | <b>457.7228</b>  | 913.4543       | <b>457.2308</b>  | 915.4461        | <b>458.2267</b>   | 916.4540         | 458.7306          | 8  |    |
| 9  | 933.4441  | 467.2257        | 916.4176         | 458.7124         | 915.4336        | <b>458.2204</b>  | <b>950.4707</b>  | <b>475.7390</b> | T    | 747.4400        | <b>749.4192</b> | 860.4277  | 430.7175        | 843.4012        | 422.2042         | 842.4172       | 421.7122         | <b>844.4090</b> | 422.7081          | <b>845.4168</b>  | 423.2121          | 7  |    |
| 10 | 1046.5282 | 523.7677        | 1029.5016        | 515.2545         | 1028.5176       | 514.7625         | <b>1063.5547</b> | <b>532.2810</b> | I    | 634.3559        | 648.3715        | 679.4137  | 340.2105        | 662.3872        | 331.6972         | 661.4032       | 331.2052         | <b>663.3950</b> | <b>332.2011</b>   | 664.4028         | <b>332.7051</b>   | 6  |    |
| 11 | 1133.5602 | 567.2837        | 1116.5337        | 558.7705         | 1115.5497       | 558.2785         | 1150.5868        | <b>575.7970</b> | S    | <b>533.3082</b> |                 | 566.3297  | <b>283.6685</b> | 549.3031        | 275.1552         | 548.3191       | 274.6632         | <b>550.3109</b> | <b>275.6591</b>   | <b>551.3188</b>  | <b>276.1630</b>   | 5  |    |
| 12 | 1261.6552 | 631.3312        | 1244.6286        | 622.8180         | 1243.6446       | 622.3259         | 1278.6817        | <b>639.8445</b> | K    | 405.2132        |                 | 479.2976  | 240.1525        | 462.2711        | 231.6392         |                |                  | <b>463.2789</b> | 232.1431          | 464.2867         | 232.6470          | 4  |    |
| 13 | 1389.7501 | 695.3787        | <b>1372.7236</b> | 686.8654         | 1371.7396       | 686.3734         | 1406.7767        | <b>703.8920</b> | K    | 277.1183        |                 | 351.2027  | 176.1050        | 334.1761        | 167.5917         |                |                  | <b>335.1840</b> | 168.0956          | 336.1918         | 168.5995          | 3  |    |
| 14 | 1446.7716 | 723.8894        | 1429.7451        | 715.3762         | 1428.7610       | 714.8842         | 1463.7982        | <b>732.4027</b> | G    |                 |                 | 223.1077  | <b>112.0575</b> |                 |                  |                |                  | 207.0890        | 104.0481          | 208.0968         | 104.5520          | 2  |    |
| 15 |           |                 |                  |                  |                 |                  |                  |                 | F    | 73.0284         |                 | 166.0863  | 83.5468         |                 |                  |                |                  | 150.0675        | 75.5374           | 151.0754         | 76.0413           | 1  |    |

Monoisotopic mass of neutral peptide Mr(calc): 1610.8433

Fixed modifications: Carbamidomethyl (C) (apply to specified residues or termini only)

Variable modifications:

T9 : Phospho STY (STY)

Ions Score: 59 Expect: 0.003

Matches : 54/240 fragment ions using 54 most intense peaks ([help](#))

# Mascot Search Results: Peptide View

PEVAVKGApTISKKGF

MS/MS Fragmentation of **PEVAVKGATISKKGFKK**

Found in **sp|P70696|H2B1A\_MOUSE** in **fgcz\_10090**, Histone H2B type 1-A OS=Mus musculus GN=Hist1h2ba

Match to Query 3912: 1867.033456 from(467.765640,4+) intensity(156393.5800) scans(2753) rtinseconds(2088.5125) index(4118)

Title: 1092: Scan 2753 (rt=34.8085) [s:\p749\Proteomics\ORBI\_2\dreanmizzi\_20110310\_sperm\_trypsin\_chymo\_AspN\_ETD\_CID\20110311\_34\_NaCl\_trypsin\_SCX\_FT.RAW]

Data file Y:\p749\Proteomics\Mascot\mgf50\_20110426\_sperm\_rerun\_trypsin\_2nd\_ETD\_run\_NaCl\_SCX\mascot\_daemon\_merge.mgf

Click mouse within plot area to zoom in by factor of two about that point

Or, Plot from  to  Da

Label all possible matches  Label matches used for scoring

Show Y-axis

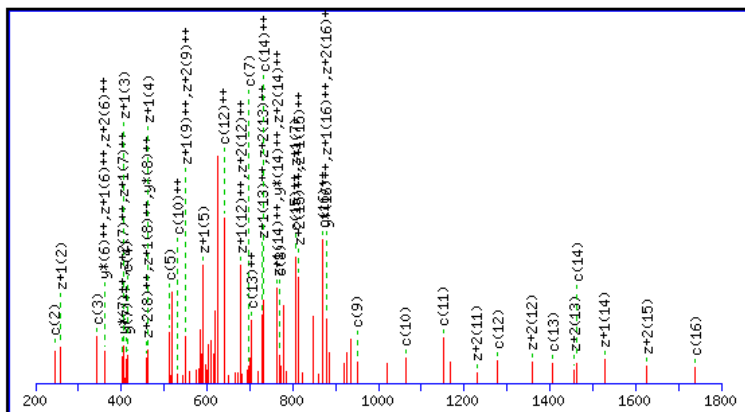

| #  | b         | b <sup>++</sup> | b <sup>*</sup> | b <sup>+++</sup> | b <sup>0</sup> | b <sup>0++</sup> | c                | c <sup>+</sup>  | Seq. | w         | w'        | y         | y <sup>+</sup> | y <sup>*</sup> | y <sup>++</sup> | y <sup>0</sup> | y <sup>0++</sup> | z+1              | z+1 <sup>++</sup> | z+2              | z+2 <sup>++</sup> | #         |    |
|----|-----------|-----------------|----------------|------------------|----------------|------------------|------------------|-----------------|------|-----------|-----------|-----------|----------------|----------------|-----------------|----------------|------------------|------------------|-------------------|------------------|-------------------|-----------|----|
| 1  | 98.0600   | 49.5337         |                |                  |                |                  | 115.0866         | 58.0469         | P    |           |           |           |                |                |                 |                |                  |                  |                   |                  |                   |           | 17 |
| 2  | 227.1026  | 114.0550        |                |                  | 209.0921       | 105.0497         | <b>244.1292</b>  | 122.5682        | E    | 1695.9557 |           | 1770.9877 | 885.9975       | 1753.9612      | <b>677.4842</b> | 1752.9772      | 876.9922         | 1754.9690        | <b>877.9882</b>   | 1755.9769        | <b>878.4921</b>   | <b>16</b> |    |
| 3  | 326.1710  | 163.5892        |                |                  | 308.1605       | 154.5839         | <b>343.1976</b>  | 172.1024        | V    | 1610.9030 |           | 1641.9452 | 821.4762       | 1624.9186      | 812.9629        | 1623.9346      | 812.4709         | 1625.9264        | <b>813.4669</b>   | <b>1626.9343</b> | <b>813.9708</b>   | <b>15</b> |    |
| 4  | 397.2082  | 199.1077        |                |                  | 379.1976       | 190.1024         | <b>414.2347</b>  | 207.6210        | A    |           |           | 1542.8767 | 771.9420       | 1525.8502      | <b>763.4287</b> | 1524.8662      | 762.9367         | <b>1526.8580</b> | <b>763.9326</b>   | 1527.8658        | <b>764.4366</b>   | <b>14</b> |    |
| 5  | 496.2766  | 248.6419        |                |                  | 478.2660       | 239.6366         | <b>513.3031</b>  | 257.1552        | V    | 1440.7974 |           | 1471.8396 | 736.4235       | 1454.8131      | 727.9102        | 1453.8291      | 727.4182         | 1455.8209        | <b>728.4141</b>   | <b>1456.8287</b> | <b>728.8190</b>   | <b>13</b> |    |
| 6  | 624.3715  | 312.6894        | 607.3450       | 304.1761         | 606.3610       | 303.6841         | 641.3981         | 321.2027        | K    | 1298.6868 |           | 1372.7712 | 686.8892       | 1355.7447      | 678.3760        | 1354.7606      | 677.8840         | 1356.7525        | <b>678.8799</b>   | <b>1357.7603</b> | <b>679.3838</b>   | <b>12</b> |    |
| 7  | 681.3930  | 341.2001        | 664.3665       | 332.6869         | 663.3824       | 332.1949         | <b>698.4196</b>  | 349.7134        | G    |           |           | 1244.6763 | 622.8418       | 1227.6497      | 614.3285        | 1226.6657      | 613.8365         | 1228.6575        | 614.8324          | <b>1229.6654</b> | 615.3363          | <b>11</b> |    |
| 8  | 752.4301  | 376.7187        | 735.4036       | 368.2054         | 734.4196       | 367.7134         | <b>769.4567</b>  | 385.2320        | A    |           |           | 1187.6548 | 594.3310       | 1170.6282      | 585.8178        | 1169.6442      | 585.3257         | 1171.6361        | 586.3217          | 1172.6439        | 586.8256          | <b>10</b> |    |
| 9  | 933.4441  | 467.2257        | 916.4176       | 458.7124         | 915.4336       | 458.2204         | <b>950.4707</b>  | 475.7390        | T    | 1003.6299 | 1005.6091 | 1116.6177 | 558.8125       | 1099.5911      | 550.2992        | 1098.6071      | 549.8072         | 1100.5989        | <b>550.8031</b>   | 1101.6688        | <b>551.3070</b>   | <b>9</b>  |    |
| 10 | 1046.5282 | 523.7677        | 1029.5016      | 515.2545         | 1028.5176      | 514.7625         | <b>1063.5547</b> | <b>532.2810</b> | I    | 890.5458  | 904.5615  | 935.6037  | 468.3055       | 918.5771       | <b>459.7922</b> | 917.5931       | 459.3002         | 919.5849         | <b>460.2961</b>   | 920.5928         | <b>460.8000</b>   | <b>8</b>  |    |
| 11 | 1133.5602 | 567.2837        | 1116.5337      | 558.7705         | 1115.5497      | 558.2785         | <b>1150.5868</b> | 575.7970        | S    | 789.4981  |           | 822.5196  | 411.7634       | 805.4931       | <b>403.2502</b> | 804.5090       | 402.7582         | <b>806.5009</b>  | <b>403.7541</b>   | 807.5087         | <b>404.2580</b>   | <b>7</b>  |    |
| 12 | 1261.6552 | 631.3312        | 1244.6286      | 622.8180         | 1243.6446      | 622.3259         | <b>1278.6817</b> | <b>639.8445</b> | K    | 661.4032  |           | 735.4876  | 368.2474       | 718.4610       | <b>359.7341</b> |                |                  | 719.4688         | <b>360.2381</b>   | 720.4767         | <b>360.7420</b>   | <b>6</b>  |    |
| 13 | 1389.7501 | 695.3787        | 1372.7236      | 686.8654         | 1371.7396      | 686.3734         | <b>1406.7767</b> | <b>703.8920</b> | K    | 533.3082  |           | 607.3926  | 304.1999       | 590.3661       | 295.6867        |                |                  | <b>591.3739</b>  | 296.1906          | 592.3817         | 296.6945          | <b>5</b>  |    |
| 14 | 1446.7716 | 723.8894        | 1429.7451      | 715.3762         | 1428.7610      | 714.8842         | <b>1463.7982</b> | <b>732.4027</b> | G    |           |           | 479.2976  | 240.1525       | 462.2711       | 231.6392        |                |                  | <b>463.2789</b>  | 232.1431          | 464.2867         | 232.6470          | <b>4</b>  |    |
| 15 | 1593.8400 | 797.4236        | 1576.8135      | 788.9104         | 1575.8295      | 788.4184         | 1610.8666        | <b>805.9369</b> | F    |           |           | 422.2762  | 211.6417       | 405.2496       | 203.1285        |                |                  | <b>406.2575</b>  | 203.6324          | 407.2653         | 204.1363          | <b>3</b>  |    |
| 16 | 1721.9350 | 861.4711        | 1704.9084      | 852.9579         | 1703.9244      | 852.4658         | <b>1738.9615</b> | <b>869.9844</b> | K    | 201.1234  |           | 275.2078  | 138.1075       | 258.1812       | 129.5942        |                |                  | <b>259.1890</b>  | 130.0982          | 260.1969         | 130.6021          | <b>2</b>  |    |
| 17 |           |                 |                |                  |                |                  |                  |                 | K    | 73.0284   |           | 147.1128  | 74.0600        | 130.0863       | 65.5468         |                |                  | 131.0941         | 66.0507           | 132.1019         | 66.5546           | <b>1</b>  |    |

**Monoisotopic mass of neutral peptide Mr(calc):** 1867.0332

**Fixed modifications:** Carbamidomethyl (C) (apply to specified residues or termini only)

**Variable modifications:**

**T9** : Phospho\_STY (STY)

**Ions Score:** 104 **Expect:** 2.4e-07

**Matches** : 53/277 fragment ions using 59 most intense peaks ([help](#))

# Mascot Search Results: Peptide View

PEVAVKGapTISKKGFKK

MS/MS Fragmentation of **IAQDFKTDLRFSAAIGALQE**

Found in **α[EOCZ27]EOCZ27\_MOUSE** in **fgcz\_10090**, Histone H3 OS=Mus musculus GN=H3E3a

Match to Query 4076: 2335.223472 from(779.415100,3+) intensity(270293.0000) scans(5883) rtinseconds(3102.4268) index(4219)

Title: 4220: Scan 5883 (rt=51.7071) [s:\p749\Proteomics\ORBI\_2\andreamizzi\_20110517\_sperm\_trypsin\_GluC\_ETD\_CID\20110524\_10\_NaCl\_GluC\_2\_II.RAW]

Data file 20110524\_10\_NaCl\_GluC\_2\_II.mgf

Click mouse within plot area to zoom in by factor of two about that point

Or,   to  Da

Label all possible matches  Label matches used for scoring

Show Y-axis

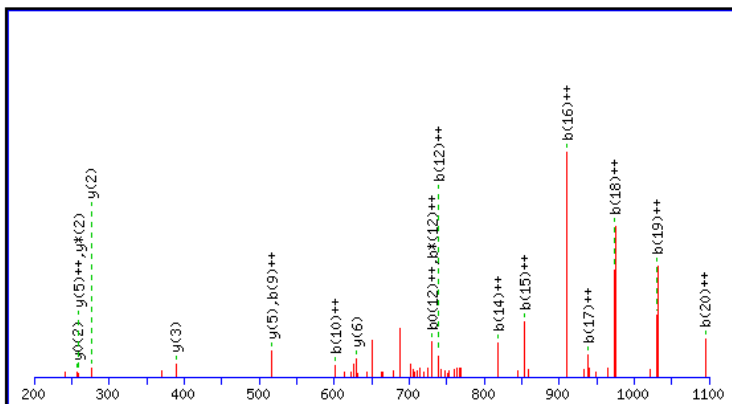

| #  | b         | b <sup>++</sup> | b <sup>+</sup> | b <sup>+++</sup> | b <sup>0</sup> | b <sup>0++</sup> | c         | c <sup>++</sup> | Seq. | w         | w'        | y         | y <sup>++</sup> | y <sup>+</sup> | y <sup>+++</sup> | y <sup>0</sup> | y <sup>0++</sup> | z+1       | z+1 <sup>++</sup> | z+2       | z+2 <sup>++</sup> | #   |    |
|----|-----------|-----------------|----------------|------------------|----------------|------------------|-----------|-----------------|------|-----------|-----------|-----------|-----------------|----------------|------------------|----------------|------------------|-----------|-------------------|-----------|-------------------|-----|----|
| 1  | 114.0913  | 57.5493         |                |                  |                |                  | 131.1179  | 66.0626         | I    |           |           |           |                 |                |                  |                |                  |           |                   |           |                   |     | 21 |
| 2  | 185.1285  | 93.0679         |                |                  |                |                  | 202.1550  | 101.5811        | A    |           |           | 2223.1404 | 1112.0739       | 2206.1139      | 1103.5606        | 2205.1299      | 1103.0686        | 2207.1217 | 1104.0645         | 2208.1295 | 1104.5684         | 220 |    |
| 3  | 313.1870  | 157.0972        | 296.1605       | 148.5839         |                |                  | 320.2136  | 165.6104        | Q    | 2078.0553 |           | 2152.1033 | 1076.5553       | 2135.0768      | 1068.0420        | 2134.0927      | 1067.5500        | 2136.0846 | 1068.5459         | 2137.0924 | 1069.0490         | 19  |    |
| 4  | 438.2140  | 214.6106        | 411.1874       | 206.0974         | 410.2034       | 205.6053         | 445.2405  | 223.1239        | D    | 1963.0284 |           | 2024.0447 | 1012.5260       | 2007.0182      | 1004.0127        | 2006.0342      | 1003.5207        | 2008.0260 | 1004.5166         | 2009.0338 | 1005.0206         | 18  |    |
| 5  | 575.2824  | 288.1448        | 558.2558       | 279.6316         | 557.2718       | 279.1396         | 592.3089  | 296.6581        | F    |           |           | 1909.0178 | 955.0125        | 1891.9912      | 946.4993         | 1891.0072      | 946.0073         | 1892.9991 | 947.0032          | 1894.0069 | 947.5071          | 17  |    |
| 6  | 703.3774  | 352.1923        | 686.3508       | 343.6790         | 685.3668       | 343.1870         | 720.4039  | 360.7056        | K    | 1687.8650 |           | 1761.9494 | 881.4783        | 1744.9228      | 872.9651         | 1743.9388      | 872.4730         | 1745.9307 | 873.4690          | 1746.9385 | 873.9729          | 16  |    |
| 7  | 804.4230  | 402.7162        | 787.3985       | 394.2029         | 786.4145       | 393.7109         | 821.4516  | 411.2294        | T    | 1600.8329 | 1602.8122 | 1633.8544 | 817.4308        | 1616.8279      | 808.9176         | 1615.8438      | 808.4256         | 1617.8357 | 809.4215          | 1618.8435 | 809.9254          | 15  |    |
| 8  | 919.4520  | 460.2296        | 902.4254       | 451.7164         | 901.4414       | 451.2243         | 936.4785  | 468.7429        | D    | 1471.7904 |           | 1532.8067 | 766.9070        | 1515.7802      | 758.3937         | 1514.7962      | 757.9017         | 1516.7880 | 758.8976          | 1517.7958 | 759.4016          | 14  |    |
| 9  | 1032.5360 | 516.7717        | 1015.5095      | 508.2584         | 1014.5255      | 507.7664         | 1049.5626 | 525.2849        | L    | 1358.7063 |           | 1417.7798 | 709.3935        | 1400.7532      | 700.8803         | 1399.7692      | 700.3883         | 1401.7611 | 701.3842          | 1402.7689 | 701.8881          | 13  |    |
| 10 | 1202.6528 | 601.8300        | 1185.6263      | 593.3168         | 1184.6422      | 592.8248         | 1219.6793 | 610.3433        | R    | 1188.5895 |           | 1304.6957 | 652.8515        | 1287.6692      | 644.3382         | 1286.6852      | 643.8462         | 1288.6770 | 644.8421          | 1289.6848 | 645.3461          | 12  |    |
| 11 | 1349.7212 | 675.3642        | 1332.6947      | 666.8510         | 1331.7106      | 666.3590         | 1366.7478 | 683.8775        | F    |           |           | 1134.5790 | 567.7931        | 1117.5524      | 559.2798         | 1116.5684      | 558.7878         | 1118.5602 | 559.7838          | 1119.5681 | 560.2877          | 11  |    |
| 12 | 1477.7798 | 739.3935        | 1460.7532      | 730.8803         | 1459.7692      | 730.3883         | 1494.8063 | 747.9068        | Q    | 913.4625  |           | 987.5106  | 494.2589        | 970.4840       | 485.7456         | 969.5000       | 485.2536         | 971.4918  | 486.2496          | 972.4997  | 486.7535          | 10  |    |
| 13 | 1564.8118 | 782.9095        | 1547.7853      | 774.3963         | 1546.8013      | 773.9043         | 1581.8384 | 791.4228        | S    | 826.4305  |           | 859.4520  | 430.2296        | 842.4254       | 421.7164         | 841.4414       | 421.2243         | 843.4333  | 422.2203          | 844.4411  | 422.7242          | 9   |    |
| 14 | 1635.8489 | 818.4281        | 1618.8224      | 809.9148         | 1617.8384      | 809.4228         | 1652.8755 | 826.9414        | A    |           |           | 772.4199  | 386.7136        | 755.394        | 378.2003         | 754.9094       | 377.7083         | 756.4012  | 378.7042          | 757.4090  | 379.2082          | 8   |    |
| 15 | 1706.8860 | 853.9467        | 1689.8595      | 845.4334         | 1688.8755      | 844.9414         | 1723.9126 | 862.4599        | A    |           |           | 701.3828  | 351.1951        | 684.3563       | 342.6818         | 683.3723       | 342.1898         | 685.3041  | 343.1857          | 686.3719  | 343.6896          | 7   |    |
| 16 | 1819.9701 | 910.4987        | 1802.9436      | 901.9754         | 1801.9955      | 901.4834         | 1836.9967 | 919.0020        | I    | 585.2879  | 599.3035  | 630.3457  | 315.6765        | 613.3192       | 307.1632         | 612.3352       | 306.6712         | 614.3270  | 307.6671          | 615.3348  | 308.1710          | 6   |    |
| 17 | 1876.9916 | 938.9994        | 1859.9650      | 930.4862         | 1858.9810      | 929.9941         | 1894.0181 | 947.5127        | G    |           |           | 517.2617  | 259.1345        | 500.2351       | 250.6212         | 499.2511       | 250.1292         | 501.2429  | 251.1251          | 502.2508  | 251.6290          | 5   |    |
| 18 | 1948.0287 | 974.5180        | 1931.0021      | 966.0047         | 1930.0181      | 965.5127         | 1965.0552 | 983.0313        | A    |           |           | 460.2402  | 230.6237        | 443.2136       | 222.1105         | 442.2296       | 221.6185         | 444.2215  | 222.6144          | 443.2293  | 223.1183          | 4   |    |
| 19 | 2061.1128 | 1031.0600       | 2044.0862      | 1022.5467        | 2043.1022      | 1022.0547        | 2078.1393 | 1039.5733       | L    | 330.1296  |           | 389.2031  | 195.1052        | 372.1765       | 186.5919         | 371.1925       | 186.0999         | 373.1844  | 187.0958          | 374.1922  | 187.5997          | 3   |    |
| 20 | 2189.1713 | 1095.0893       | 2172.1448      | 1086.5760        | 2171.1608      | 1086.0840        | 2206.1979 | 1103.6026       | Q    | 202.0710  |           | 276.1190  | 138.5631        | 259.0925       | 130.0499         | 258.1084       | 129.5579         | 260.1003  | 130.5538          | 261.1081  | 131.0577          | 2   |    |
| 21 |           |                 |                |                  |                |                  |           |                 | E    | 73.0284   |           | 148.0604  | 74.5339         |                |                  | 130.0499       | 65.5286          | 132.0417  | 66.5245           | 133.0495  | 67.0284           | 1   |    |

**Monoisotopic mass of neutral peptide Mr(calc):** 2335.2172

**Fixed modifications:** Carbamidomethyl (C) (apply to specified residues or termini only)

**Variable modifications:**

**R10** : Methyl\_KR (KR)

**Ions Score:** 55 **Expect:** 0.017

**Matches** : 19/363 fragment ions using 29 most intense peaks ([help](#))

# Mascot Search Results: Peptide View

IAQDFKTDLRme1FQSAAIGALQE

MS/MS Fragmentation of **KSAPATGGVKKPHR**

Found in **sp|P68433|H31\_MOUSE** in **fgcz\_10090**, Histone H3.1 OS=Mus musculus GN=Hist1h3a

Match to Query 1715: 1446.841096 from(362.717550,4+) intensity(51074.3520) scans(1971) rtinseconds(1308.4027) index(1009)

Title: 1010: Scan 1971 (t=21.8067) [s:\p749\Proteomics\ORBI\_2\andreamizzi\_20110310\_sperm\_trypsin\_chymo\_AspN\_ETD\_CID\20110310\_11\_NaCl\_trypsin.RAW]

Data file \\fgcz-ms.uzh.ch\p749\Proteomics\ORBI\_2\andreamizzi\_20110310\_sperm\_trypsin\_chymo\_AspN\_ETD\_CID\mgf\_low\_res\_MS2\_nomerge\20110310\_11\_NaCl\_trypsin.mgf

Click mouse within plot area to zoom in by factor of two about that point

Or, Plot from  to  Da

Label all possible matches  Label matches used for scoring

Show Y-axis

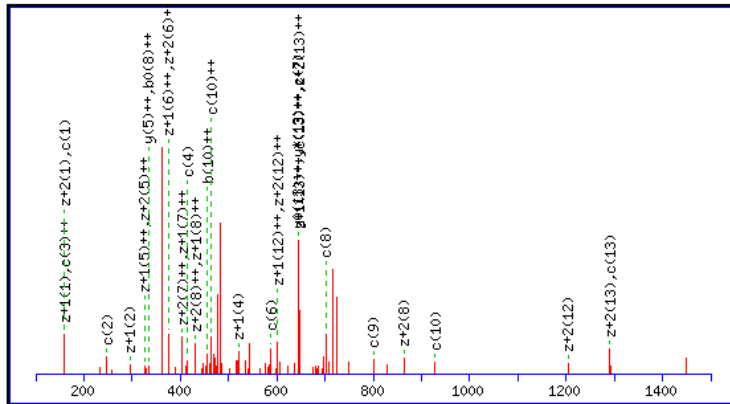

| #  | b         | b <sup>++</sup> | b <sup>*</sup> | b <sup>++</sup> | b <sup>0</sup> | b <sup>0++</sup> | c         | c <sup>++</sup> | Seq. | w         | w <sup>*</sup> | y         | y <sup>++</sup> | y <sup>*</sup> | y <sup>++</sup> | y <sup>0</sup> | y <sup>0++</sup> | z+1       | z+1 <sup>++</sup> | z+2       | z+2 <sup>++</sup> | # |    |
|----|-----------|-----------------|----------------|-----------------|----------------|------------------|-----------|-----------------|------|-----------|----------------|-----------|-----------------|----------------|-----------------|----------------|------------------|-----------|-------------------|-----------|-------------------|---|----|
| 1  | 143.1179  | 72.0626         | 126.0913       | 63.5493         |                |                  | 160.1444  | 80.5759         | K    |           |                |           |                 |                |                 |                |                  |           |                   |           |                   |   | 14 |
| 2  | 230.1499  | 115.5786        | 213.1234       | 107.0653        | 212.1394       | 106.5733         | 247.1765  | 124.0919        | S    | 1272.7171 |                | 1305.7386 | 653.3729        | 1288.7120      | 644.8597        | 1287.7280      | 644.3677         | 1289.7199 | 645.3636          | 1290.7277 | 645.8675          |   | 13 |
| 3  | 301.1870  | 151.0972        | 284.1605       | 142.5839        | 283.1765       | 142.0919         | 318.2136  | 159.6104        | A    |           |                | 1218.7066 | 609.8569        | 1201.6800      | 601.3436        | 1200.6960      | 600.8516         | 1202.6878 | 601.8476          | 1203.6957 | 602.3515          |   | 12 |
| 4  | 398.2398  | 199.6235        | 381.2132       | 191.1103        | 380.2292       | 190.6183         | 415.2663  | 208.1368        | P    | 1104.6273 |                | 1147.6695 | 574.3384        | 1130.6429      | 565.8251        | 1129.6589      | 565.3331         | 1131.6507 | 566.3290          | 1132.6586 | 568.8329          |   | 11 |
| 5  | 469.2769  | 235.1421        | 452.2504       | 226.6288        | 451.2663       | 226.1368         | 486.3035  | 243.6554        | A    |           |                | 1050.6167 | 525.8120        | 1033.5901      | 517.2987        | 1032.6061      | 516.8067         | 1034.5900 | 517.8026          | 1035.6086 | 518.3065          |   | 10 |
| 6  | 570.3246  | 285.6659        | 553.2980       | 277.1527        | 552.3140       | 276.6606         | 587.3571  | 294.1792        | T    | 946.5581  | 948.5374       | 979.5796  | 490.2934        | 962.5330       | 481.7802        | 961.5690       | 481.2881         | 963.5609  | 482.2841          | 964.5687  | 482.7880          |   | 9  |
| 7  | 627.3461  | 314.1767        | 610.3195       | 305.6634        | 609.3355       | 305.1714         | 644.3726  | 322.6899        | G    |           |                | 878.5319  | 439.7696        | 861.5053       | 431.2563        |                |                  | 862.5132  | 431.7602          | 863.5210  | 432.2641          |   | 8  |
| 8  | 684.3675  | 342.6874        | 667.3410       | 334.1741        | 666.3570       | 333.6821         | 701.3941  | 351.2007        | G    |           |                | 821.5104  | 411.2589        | 804.4839       | 402.7456        |                |                  | 805.4917  | 403.2495          | 806.4995  | 403.7534          |   | 7  |
| 9  | 783.4359  | 392.2216        | 766.4094       | 383.7083        | 765.4254       | 383.2163         | 800.4625  | 400.7349        | V    | 733.4468  |                | 764.4890  | 382.7481        | 747.4624       | 374.2348        |                |                  | 748.4702  | 374.7388          | 749.4781  | 375.2427          |   | 6  |
| 10 | 911.5309  | 456.2691        | 894.5043       | 447.7558        | 893.5203       | 447.2638         | 928.5574  | 464.7824        | K    | 591.3362  |                | 665.4206  | 333.2139        | 648.3940       | 324.7006        |                |                  | 649.4018  | 325.2046          | 650.4097  | 325.7085          |   | 5  |
| 11 | 1039.6259 | 520.3166        | 1022.5993      | 511.8033        | 1021.6153      | 511.3113         | 1056.6524 | 528.8298        | K    | 463.2412  |                | 537.3256  | 269.1664        | 520.2990       | 260.6532        |                |                  | 521.3069  | 261.1571          | 522.3147  | 261.6610          |   | 4  |
| 12 | 1136.6786 | 568.8429        | 1119.6521      | 560.3297        | 1118.6681      | 559.8377         | 1153.7052 | 577.3562        | P    | 366.1884  |                | 409.2306  | 205.1190        | 392.2041       | 196.6057        |                |                  | 393.2119  | 197.1096          | 394.2197  | 197.6135          |   | 3  |
| 13 | 1273.7375 | 637.3724        | 1256.7110      | 628.8591        | 1255.7270      | 628.3671         | 1290.7641 | 645.8857        | H    |           |                | 312.1779  | 156.5926        | 295.1513       | 148.0793        |                |                  | 296.1591  | 148.5832          | 297.1670  | 149.0871          |   | 2  |
| 14 |           |                 |                |                 |                |                  |           |                 | R    | 73.0284   |                | 175.1190  | 88.0631         | 158.0924       | 79.5498         |                |                  | 159.1002  | 80.0538           | 160.1081  | 80.5577           |   | 1  |

Monoisotopic mass of neutral peptide Mr(calcd): 1446.8419

Fixed modifications: Carbamidomethyl (C) (apply to specified residues or termini only)

Variable modifications:

K1 : Methyl KR (KR)

Ions Score: 56 Expect: 0.00041

Matches : 36/225 fragment ions using 40 most intense peaks ([help](#))

# Mascot Search Results: Peptide View

Kme1SAPATGGVKKPHR

MS/MS Fragmentation of **KSAPATGGVKKPHR**

Found in **sp|P68433|H3.1\_MOUSE** in **fgcz\_10090**, Histone H3.1 OS=Mus musculus GN=Hist1h3a

Match to Query 1767: 1474.874736 from(369.725960,4+) intensity(191721.0800) scans(1996) rtinseconds(1319.3775) index(1025)

Title: 1026: Scan 1996 (rt=21.9896) [s:\p749\Proteomics\ORBI\_2\andreamizzi\_20110310\_sperm\_trypsin\_chymo\_AspN\_ETD\_CID\20110310\_11\_NaCl\_trypsin.RAW]

Data file \wgcg-ms.uzh.ch\p749\Proteomics\ORBI\_2\andreamizzi\_20110310\_sperm\_trypsin\_chymo\_AspN\_ETD\_CID\wgcg\_low\_res\_MS2\_nomerge\20110310\_11\_NaCl\_trypsin.mgf

Click mouse within plot area to zoom in by factor of two about that point

Or, Plot from  to  Da

Label all possible matches  Label matches used for scoring

Show Y-axis

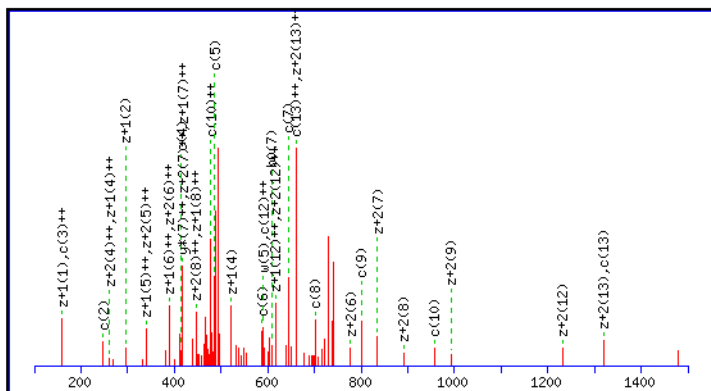

| #  | b         | b <sup>++</sup> | b <sup>*</sup> | b <sup>+++</sup> | b <sup>0</sup>  | b <sup>0++</sup> | c                | c <sup>++</sup> | Seq. | w               | w'       | y         | y <sup>++</sup> | y <sup>*</sup> | y <sup>+++</sup> | y <sup>0</sup> | y <sup>0++</sup> | z+1             | z+1 <sup>++</sup> | z+2              | z+2 <sup>++</sup> | # |    |
|----|-----------|-----------------|----------------|------------------|-----------------|------------------|------------------|-----------------|------|-----------------|----------|-----------|-----------------|----------------|------------------|----------------|------------------|-----------------|-------------------|------------------|-------------------|---|----|
| 1  | 143.1179  | 72.0626         | 126.0913       | 63.5493          |                 |                  | 160.1444         | 80.5759         | K    |                 |          |           |                 |                |                  |                |                  |                 |                   |                  |                   |   | 14 |
| 2  | 230.1499  | 115.5786        | 213.1234       | 107.0653         | 212.1394        | 106.5733         | <b>247.1765</b>  | 124.0919        | S    | 1300.7484       |          | 1333.7699 | 667.3886        | 1316.7433      | 658.8753         | 1315.7593      | 658.3833         | 1317.7512       | 659.3792          | <b>1318.7590</b> | <b>659.8831</b>   |   | 13 |
| 3  | 301.1870  | 151.0972        | 284.1605       | 142.5839         | 283.1765        | 142.0919         | 318.2136         | <b>159.6104</b> | A    |                 |          | 1246.7379 | 623.8726        | 1229.7113      | 615.3593         | 1228.7273      | 614.8673         | 1230.7191       | <b>615.8632</b>   | <b>1231.7270</b> | <b>616.3671</b>   |   | 12 |
| 4  | 398.2398  | 199.6235        | 381.2132       | 191.1103         | 380.2292        | 190.6183         | <b>415.2663</b>  | 208.1368        | P    | 1132.6586       |          | 1175.7008 | 588.3540        | 1158.6742      | 579.8407         | 1157.6902      | 579.3487         | 1159.6820       | 580.3447          | 1160.6899        | 580.8486          |   | 11 |
| 5  | 469.2769  | 235.1421        | 452.2504       | 226.6288         | 451.2663        | 226.1368         | <b>486.3035</b>  | 243.6554        | A    |                 |          | 1078.6480 | 539.8276        | 1061.6214      | 531.3144         | 1060.6374      | 530.8223         | 1062.6293       | 531.8183          | 1063.6371        | 532.3222          |   | 10 |
| 6  | 570.3246  | 285.6659        | 553.2980       | 277.1527         | 552.3140        | 276.6606         | <b>587.3511</b>  | 294.1792        | T    | 974.5894        | 976.5687 | 1007.6109 | 504.3091        | 990.5843       | 495.7958         | 989.6003       | 495.3038         | 991.5922        | 496.2997          | <b>992.6000</b>  | 496.8036          |   | 9  |
| 7  | 627.3461  | 314.1767        | 610.3195       | 305.6634         | <b>609.3355</b> | 305.1714         | <b>644.3726</b>  | 322.6899        | G    |                 |          | 906.5632  | 453.7852        | 889.5366       | 445.2720         |                |                  | 890.5445        | <b>445.7759</b>   | <b>891.5523</b>  | <b>446.2798</b>   |   | 8  |
| 8  | 684.3675  | 342.6874        | 667.3410       | 334.1741         | 666.3570        | 333.6821         | <b>701.3941</b>  | 351.2007        | G    |                 |          | 849.5417  | 425.2745        | 832.5152       | <b>416.7612</b>  |                |                  | 833.5230        | <b>417.2651</b>   | <b>834.5308</b>  | <b>417.7691</b>   |   | 7  |
| 9  | 783.4359  | 392.2216        | 766.4094       | 383.7083         | 765.4254        | 383.2163         | <b>800.4625</b>  | 400.7349        | V    | 761.4781        |          | 792.5203  | 396.7638        | 775.4937       | 388.2505         |                |                  | 776.5015        | <b>388.7544</b>   | <b>777.5094</b>  | <b>389.2583</b>   |   | 6  |
| 10 | 939.5622  | 470.2847        | 922.5356       | 461.7715         | 921.5516        | 461.2795         | <b>956.5887</b>  | <b>478.7980</b> | K    | <b>591.3362</b> |          | 693.4519  | 347.2296        | 676.4253       | 338.7163         |                |                  | 677.4331        | <b>339.2202</b>   | <b>678.4410</b>  | <b>339.7241</b>   |   | 5  |
| 11 | 1067.6572 | 534.3322        | 1050.6306      | 525.8189         | 1049.6466       | 525.3269         | 1084.6837        | 542.8455        | K    | 463.2412        |          | 537.3256  | 269.1664        | 520.2990       | 260.6532         |                |                  | <b>521.3069</b> | <b>261.1571</b>   | <b>522.3147</b>  | <b>261.6610</b>   |   | 4  |
| 12 | 1164.7099 | 582.8586        | 1147.6834      | 574.3453         | 1146.6994       | 573.8533         | 1181.7365        | <b>591.3719</b> | P    | 366.1884        |          | 409.2306  | 205.1190        | 392.2041       | 196.6057         |                |                  | 393.2119        | 197.1096          | 394.2197         | 197.6135          |   | 3  |
| 13 | 1301.7688 | 651.3881        | 1284.7423      | 642.8748         | 1283.7583       | 642.3828         | <b>1318.7954</b> | <b>659.9013</b> | H    |                 |          | 312.1779  | 156.5926        | 295.1513       | 148.0793         |                |                  | <b>296.1591</b> | 148.5832          | 297.1670         | 149.0871          |   | 2  |
| 14 |           |                 |                |                  |                 |                  |                  |                 | R    | 73.0284         |          | 175.1190  | 88.0631         | 158.0924       | 79.5498          |                |                  | <b>159.1002</b> | 80.0538           | 160.1081         | 80.5577           |   | 1  |

Monoisotopic mass of neutral peptide Mr(calc): 1474.8732

Fixed modifications: Carbamidomethyl (C) (apply to specified residues or termini only)

Variable modifications:

K1 : Methyl\_KR (KR)

K10 : Dimethyl\_KR (KR)

Ions Score: 63 Expect: 0.0006

Matches : 38/225 fragment ions using 43 most intense peaks ([help](#))

# Mascot Search Results: Peptide View

Kme1SAPATGGVKKme2KPHR



MS/MS Fragmentation of **KSPATGGVKKPHR**

Found in **sp|P68433|H31\_MOUSE** in **fgcz\_10090**, Histone H3.1 OS=Mus musculus GN=Hist1h3a

Match to Query 2777: 1460.859616 from(366.222180,4+) intensity(13951.9530) scans(1376) rtinseconds(1331.7536) index(3207)

Title: 181: Scan 1376 (rt=22.1959) [s:\p749\Proteomics\ORBI\_2\landreamizzi\_20110310\_sperm\_trypsin\_chymo\_AspN\_ETD\_CID\20110311\_34\_NaCl\_trypsin\_SCX\_FT.RAW]

Data file Y:\p749\Proteomics\Mascot\mgf50\_20110426\_sperm\_rerun\_trypsin\_2nd\_ETD\_run\_NaCl\_SCX\mascot\_daemon\_merge.mgf

Click mouse within plot area to zoom in by factor of two about that point

Or, Plot from  to  Da

Label all possible matches  Label matches used for scoring

Show Y-axis

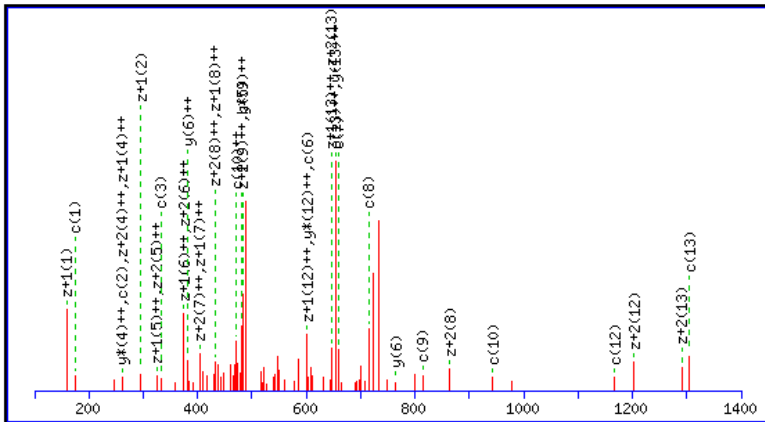

| #  | b               | b <sup>++</sup> | b <sup>*</sup> | b <sup>++</sup> | b <sup>0</sup> | b <sup>0++</sup> | c                | c <sup>++</sup> | Seq. | w         | w'       | y               | y <sup>++</sup> | y <sup>*</sup> | y <sup>++</sup> | y <sup>0</sup> | y <sup>0++</sup> | z+1             | z+1 <sup>++</sup> | z+2              | z+2 <sup>++</sup> | # |    |    |
|----|-----------------|-----------------|----------------|-----------------|----------------|------------------|------------------|-----------------|------|-----------|----------|-----------------|-----------------|----------------|-----------------|----------------|------------------|-----------------|-------------------|------------------|-------------------|---|----|----|
| 1  | 157.1335        | 79.0704         | 140.1070       | 70.5571         |                |                  | <b>174.1601</b>  | 87.5837         | K    |           |          |                 |                 |                |                 |                |                  |                 |                   |                  |                   |   | 14 |    |
| 2  | 244.1656        | 122.5864        | 227.1390       | 114.0731        | 226.1550       | 113.5811         | <b>261.1921</b>  | 131.0997        | S    | 1272.7171 |          | 1305.7386       | <b>653.3729</b> | 1288.7120      | 644.8597        | 1287.7280      | 644.3677         | 1289.7199       | <b>645.3636</b>   | <b>1290.7277</b> | <b>645.8675</b>   |   |    | 13 |
| 3  | 315.2027        | 158.1050        | 298.1761       | 149.5917        | 297.1921       | 149.0997         | <b>332.2292</b>  | 166.6183        | A    |           |          | 1218.7066       | 609.8569        | 1201.6800      | <b>601.3436</b> | 1200.6960      | 600.8516         | 1202.6878       | <b>601.8476</b>   | <b>1203.6957</b> | 602.3515          |   |    | 12 |
| 4  | 412.2554        | 206.6314        | 395.2289       | 198.1181        | 394.2449       | 197.6261         | 429.2820         | 215.1446        | P    | 1104.6273 |          | 1147.6695       | 574.3384        | 1130.6429      | 565.8251        | 1129.6589      | 565.3331         | 1131.6507       | 566.3290          | 1132.6586        | 568.8329          |   |    | 11 |
| 5  | <b>483.2926</b> | 242.1499        | 466.2660       | 233.6366        | 465.2820       | 233.1446         | 500.3191         | 250.6632        | A    |           |          | 1050.6167       | 525.8120        | 1033.5901      | 517.2987        | 1032.6061      | 516.8067         | 1034.5980       | 517.8026          | 1035.6058        | 518.3065          |   |    | 10 |
| 6  | 584.3402        | 292.6738        | 567.3137       | 284.1605        | 566.3297       | 283.6685         | <b>601.3668</b>  | 301.1870        | T    | 946.5581  | 948.5374 | 979.5796        | 490.2934        | 962.5530       | <b>481.7802</b> | 961.5690       | 481.2881         | 963.5609        | <b>482.2841</b>   | 964.5687         | <b>482.7880</b>   |   |    | 9  |
| 7  | 641.3617        | 321.1845        | 624.3352       | 312.6712        | 623.3511       | 312.1792         | <b>658.3883</b>  | 329.6978        | G    |           |          | 878.5319        | 439.7696        | 861.5053       | 431.2563        |                |                  | 862.5132        | <b>431.7602</b>   | <b>863.5210</b>  | <b>432.2641</b>   |   |    | 8  |
| 8  | 698.3832        | 349.6952        | 681.3566       | 341.1819        | 680.3726       | 340.6899         | <b>715.4097</b>  | 358.2085        | G    |           |          | 821.5104        | 411.2589        | 804.4839       | 402.7456        |                |                  | 805.4917        | <b>403.2495</b>   | 806.4995         | <b>403.7534</b>   |   |    | 7  |
| 9  | 797.4516        | 399.2294        | 780.4250       | 390.7162        | 779.4410       | 390.2241         | <b>814.4781</b>  | 407.7427        | V    | 733.4468  |          | <b>764.4890</b> | <b>382.7481</b> | 747.4624       | 374.2348        |                |                  | 748.4702        | <b>374.7388</b>   | 749.4781         | <b>375.2427</b>   |   |    | 6  |
| 10 | 925.5465        | 463.2769        | 908.5200       | 454.7636        | 907.5360       | 454.2716         | <b>942.5731</b>  | <b>471.7902</b> | K    | 591.3362  |          | 665.4206        | 333.2139        | 648.3940       | 324.7006        |                |                  | 649.4018        | <b>325.2046</b>   | 650.4097         | <b>325.7085</b>   |   |    | 5  |
| 11 | 1053.6415       | 527.3244        | 1036.6150      | 518.8111        | 1035.6309      | 518.3191         | 1070.6681        | 535.8377        | K    | 463.2412  |          | 537.3256        | 269.1664        | 520.2990       | <b>260.6532</b> |                |                  | 521.3069        | <b>261.1571</b>   | 522.3147         | <b>261.6610</b>   |   |    | 4  |
| 12 | 1150.6943       | 575.8508        | 1133.6677      | 567.3375        | 1132.6837      | 566.8455         | <b>1167.7208</b> | 584.3640        | P    | 366.1884  |          | 409.2306        | 205.1190        | 392.2041       | 196.6057        |                |                  | 393.2119        | 197.1096          | 394.2197         | 197.6135          |   |    | 3  |
| 13 | 1287.7532       | 644.3802        | 1270.7266      | 635.8670        | 1269.7426      | 635.3749         | <b>1304.7797</b> | <b>652.8935</b> | H    |           |          | 312.1779        | 156.5926        | 295.1513       | 148.0793        |                |                  | <b>296.1591</b> | 148.5832          | 297.1670         | 149.0871          |   |    | 2  |
| 14 |                 |                 |                |                 |                |                  |                  |                 | R    | 73.0284   |          | 175.1190        | 88.0631         | 158.0924       | 79.5498         |                |                  | <b>159.1002</b> | 80.0538           | 160.1081         | 80.5577           |   |    | 1  |

Monoisotopic mass of neutral peptide Mr(calc): 1460.8576

Fixed modifications: Carbamidomethyl (C) (apply to specified residues or termini only)

Variable modifications:

K1 : Dimethyl\_KR (KR)

Ions Score: 89 Expect: 1e-06

Matches : 39/225 fragment ions using 33 most intense peaks ([help](#))

# Mascot Search Results: Peptide View

Kme2SAPATGGVKKPHR

MS/MS Fragmentation of **KSPATGGVKKPHR**

Found in **sp|P68433|H3L\_MOUSE** in **fgcz\_10090**, Histone H3.1 OS=Mus musculus GN=Hist1h3a

Match to Query 2340: 1488.889336 from(373.229610,4+) intensity(23718.8750) scans(2307) rtinseconds(1399.9765) index(1369)

Title: 1370: Scan 2307 (rt=23.3329) [s:\p749\Proteomics\ORBI\_2\andreamizzi\_20110517\_sperm\_trypsin\_GluC\_ETD\_CID\20110517\_01\_NaCl\_1.RAW]

Data file 20110517\_01\_NaCl\_1.mgf

Click mouse within plot area to zoom in by factor of two about that point

Or,  to  Da

Label all possible matches  Label matches used for scoring

Show Y-axis

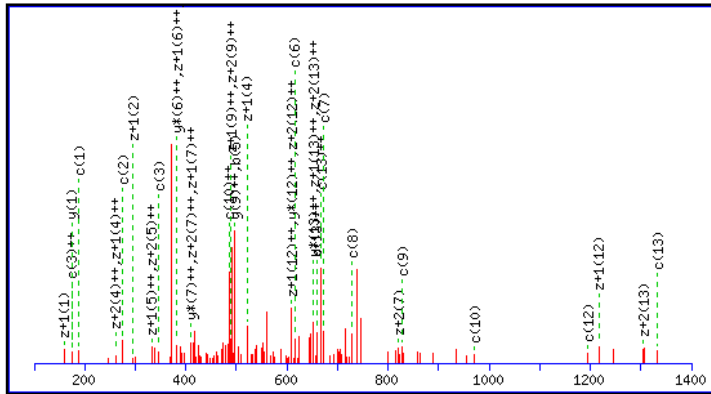

| #  | b         | b <sup>++</sup> | b <sup>+</sup> | b <sup>+++</sup> | b <sup>0</sup> | b <sup>0++</sup> | c         | c <sup>++</sup> | Seq. | w         | w'       | y         | y <sup>++</sup> | y <sup>+</sup> | y <sup>+++</sup> | y <sup>0</sup> | y <sup>0++</sup> | z+1       | z+1 <sup>++</sup> | z+2       | z+2 <sup>++</sup> | #  |    |
|----|-----------|-----------------|----------------|------------------|----------------|------------------|-----------|-----------------|------|-----------|----------|-----------|-----------------|----------------|------------------|----------------|------------------|-----------|-------------------|-----------|-------------------|----|----|
| 1  | 171.1492  | 86.0782         | 154.1226       | 77.5650          |                |                  | 188.1757  | 94.5915         | K    |           |          |           |                 |                |                  |                |                  |           |                   |           |                   |    | 14 |
| 2  | 258.1812  | 129.5942        | 241.1547       | 121.0810         | 240.1707       | 120.5890         | 275.2078  | 138.1075        | S    | 1286.7328 |          | 1319.7542 | 660.3808        | 1302.7277      | 651.8675         | 1301.7437      | 651.3755         | 1303.7355 | 652.3714          | 1304.7433 | 652.8753          | 13 |    |
| 3  | 329.2183  | 165.1128        | 312.1918       | 156.5995         | 311.2078       | 156.1075         | 346.2449  | 173.6261        | A    |           |          | 1232.7222 | 616.8647        | 1215.6957      | 608.3515         | 1214.7117      | 607.8595         | 1216.7035 | 608.8554          | 1217.7113 | 609.3593          | 12 |    |
| 4  | 426.2711  | 213.6392        | 409.2445       | 205.1259         | 408.2605       | 204.6339         | 443.2976  | 222.1525        | P    | 1118.6429 |          | 1161.6851 | 581.3462        | 1144.6586      | 572.8329         | 1143.6745      | 572.3409         | 1145.6664 | 573.3368          | 1146.6742 | 573.8407          | 11 |    |
| 5  | 497.3082  | 249.1577        | 480.2817       | 240.6445         | 479.2976       | 240.1525         | 514.3348  | 257.6710        | A    |           |          | 1064.6323 | 532.8198        | 1047.6058      | 524.3065         | 1046.6218      | 523.8145         | 1048.6136 | 524.8104          | 1049.6214 | 525.3144          | 10 |    |
| 6  | 598.3559  | 299.6816        | 581.3293       | 291.1683         | 580.3453       | 290.6763         | 615.3824  | 308.1949        | T    | 960.5738  | 962.5530 | 993.5952  | 497.3013        | 976.5687       | 488.7880         | 975.5847       | 488.2960         | 977.5765  | 489.2919          | 978.5843  | 489.7958          | 9  |    |
| 7  | 655.3774  | 328.1923        | 638.3508       | 319.6790         | 637.3668       | 319.1870         | 672.4039  | 336.7056        | G    |           |          | 892.5475  | 446.7774        | 875.5210       | 438.2641         |                |                  | 876.5288  | 438.7680          | 877.5366  | 439.2720          | 8  |    |
| 8  | 712.3988  | 356.7030        | 695.3723       | 348.1898         | 694.3883       | 347.6978         | 729.4254  | 365.2163        | G    |           |          | 835.5261  | 418.2667        | 818.4995       | 409.7534         |                |                  | 819.5074  | 410.2573          | 820.5152  | 410.7612          | 7  |    |
| 9  | 811.4672  | 406.2373        | 794.4407       | 397.7240         | 793.4567       | 397.2320         | 828.4938  | 414.7505        | V    | 747.4624  |          | 778.5046  | 389.7559        | 761.4781       | 381.2427         |                |                  | 762.4859  | 381.7466          | 763.4937  | 382.2505          | 6  |    |
| 10 | 953.5778  | 477.2926        | 936.5513       | 468.7793         | 935.5673       | 468.2873         | 970.6044  | 485.8058        | K    | 591.3362  |          | 679.4362  | 340.2217        | 662.4097       | 331.7085         |                |                  | 663.4175  | 332.2124          | 664.4253  | 332.7163          | 5  |    |
| 11 | 1081.6728 | 541.3400        | 1064.6463      | 532.8268         | 1063.6622      | 532.3348         | 1098.6994 | 549.8533        | K    | 463.2412  |          | 537.3256  | 269.1664        | 520.2990       | 260.6532         |                |                  | 521.3069  | 261.1571          | 522.3147  | 261.6610          | 4  |    |
| 12 | 1178.7256 | 589.8664        | 1161.6990      | 581.3531         | 1160.7150      | 580.8611         | 1195.7521 | 598.3797        | P    | 366.1884  |          | 409.2306  | 205.1190        | 392.2041       | 196.6057         |                |                  | 393.2119  | 197.1096          | 394.2197  | 197.6135          | 3  |    |
| 13 | 1315.7845 | 658.3959        | 1298.7579      | 649.8826         | 1297.7739      | 649.3906         | 1332.8110 | 666.9092        | H    |           |          | 312.1779  | 156.5926        | 295.1513       | 148.0793         |                |                  | 296.1591  | 148.5832          | 297.1670  | 149.0871          | 2  |    |
| 14 |           |                 |                |                  |                |                  |           |                 | R    | 73.0284   |          | 175.1190  | 88.0631         | 158.0924       | 79.5498          |                |                  | 159.1002  | 80.0538           | 160.1081  | 80.5577           | 1  |    |

Monoisotopic mass of neutral peptide Mr(calc): 1488.8889

Fixed modifications: Carbamidomethyl (C) (apply to specified residues or termini only)

Variable modifications:

K1 : Trimethyl (K)

K10 : Methyl\_KR (KR)

Ions Score: 52 Expect: 0.0041

Matches : 41/225 fragment ions using 58 most intense peaks ([help](#))

## Mascot Search Results: Peptide View

Kme3SAPATGGVKKme1KPHR

MS/MS Fragmentation of **KSAPATGGVKKPHR**

Found in [sp|P68433|H31\\_MOUSE](#) in [fgez\\_10090](#), Histone H3.1 OS=Mus musculus GN=Hist1h3a

Match to Query 2294: 1474.872656 from(369.725440,4+) intensity(22652.7930) scans(2291) rtinseconds(1392.7874) index(1360)

Title: 1361: Scan 2291 (rt=23.2131) [s\p749\Proteomics\ORBI\_2\andreamizzi\_20110517\_sperm\_trypsin\_GluC\_ETD\_CID\20110517\_01\_NaCl\_1.RAW]

Data file 20110517\_01\_NaCl\_1.mgf

Click mouse within plot area to zoom in by factor of two about that point

Or,  to  Da

Label all possible matches  Label matches used for scoring

Show Y-axis

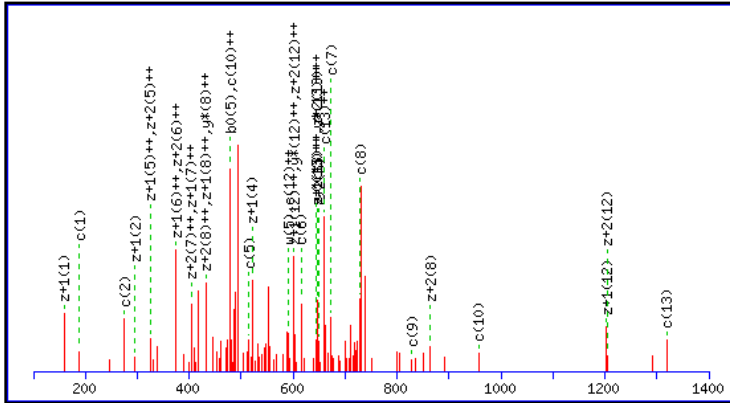

| #  | b         | b <sup>+</sup> | b <sup>*</sup> | b <sup>++</sup> | b <sup>0</sup>  | b <sup>0++</sup> | c                | c <sup>+</sup>  | Seq. | w               | w'       | y         | y <sup>+</sup> | y <sup>*</sup> | y <sup>++</sup> | y <sup>0</sup> | y <sup>0++</sup> | z+1              | z+1 <sup>++</sup> | z+2              | z+2 <sup>++</sup> | #  |    |
|----|-----------|----------------|----------------|-----------------|-----------------|------------------|------------------|-----------------|------|-----------------|----------|-----------|----------------|----------------|-----------------|----------------|------------------|------------------|-------------------|------------------|-------------------|----|----|
| 1  | 171.1492  | 86.0782        | 154.1226       | 77.5650         |                 |                  | <b>188.1757</b>  | 94.5915         | K    |                 |          |           |                |                |                 |                |                  |                  |                   |                  |                   |    | 14 |
| 2  | 258.1812  | 129.5942       | 241.1547       | 121.0810        | 240.1707        | 120.5890         | <b>275.2078</b>  | 138.1075        | S    | 1272.7171       |          | 1305.7386 | 653.3729       | 1288.7120      | <b>644.8597</b> | 1287.7280      | <b>644.3677</b>  | 1289.7199        | <b>645.3636</b>   | 1290.7277        | <b>645.8675</b>   | 13 |    |
| 3  | 329.2183  | 165.1128       | 312.1918       | 156.5995        | 311.2078        | 156.1075         | 346.2449         | 173.6261        | A    |                 |          | 1218.7066 | 609.8569       | 1201.6800      | <b>601.3436</b> | 1200.6960      | 600.8516         | <b>1202.6878</b> | <b>601.8476</b>   | <b>1203.6957</b> | <b>602.3515</b>   | 12 |    |
| 4  | 426.2711  | 213.6392       | 409.2445       | 205.1259        | 408.2605        | 204.6339         | 443.2976         | 222.1525        | P    | 1104.6273       |          | 1147.6695 | 574.3384       | 1130.6429      | 565.8251        | 1129.6589      | 565.3331         | 1131.6507        | 566.3290          | 1132.6586        | 566.8329          | 11 |    |
| 5  | 497.3082  | 249.1577       | 480.2817       | 240.6445        | <b>479.2976</b> | 240.1525         | <b>514.3348</b>  | 257.6710        | A    |                 |          | 1050.6167 | 525.8120       | 1033.5901      | 517.2987        | 1032.6061      | 516.8067         | 1034.5980        | 517.8026          | 1035.6058        | 518.3065          | 10 |    |
| 6  | 598.3559  | 299.6816       | 581.3293       | 291.1683        | 580.3453        | 290.6763         | <b>615.3824</b>  | 308.1949        | T    | 946.5581        | 948.5374 | 979.5796  | 490.2934       | 962.5530       | 481.7802        | 961.5690       | 481.2881         | 963.5609         | 482.2841          | 964.5687         | 482.7880          | 9  |    |
| 7  | 655.3774  | 328.1923       | 638.3508       | 319.6790        | 637.3668        | 319.1870         | <b>672.4039</b>  | 336.7056        | G    |                 |          | 878.5319  | 439.7696       | 861.5053       | <b>431.2563</b> |                |                  | 862.5132         | <b>431.7602</b>   | <b>863.5210</b>  | <b>432.2641</b>   | 8  |    |
| 8  | 712.3988  | 356.7030       | 695.3723       | 348.1898        | 694.3883        | 347.6978         | <b>729.4254</b>  | 365.2163        | G    |                 |          | 821.5104  | 411.2589       | 804.4839       | 402.7456        |                |                  | 805.4917         | <b>403.2495</b>   | 806.4995         | <b>403.7534</b>   | 7  |    |
| 9  | 811.4672  | 406.2373       | 794.4407       | 397.7240        | 793.4567        | 397.2320         | <b>828.4938</b>  | 414.7505        | V    | 733.4468        |          | 764.4890  | 382.7481       | 747.4624       | 374.2348        |                |                  | 748.4702         | <b>374.7388</b>   | 749.4781         | <b>375.2427</b>   | 6  |    |
| 10 | 939.5622  | 470.2847       | 922.5356       | 461.7715        | 921.5516        | 461.2795         | <b>956.5887</b>  | <b>478.7980</b> | K    | <b>591.3362</b> |          | 665.4206  | 333.2139       | 648.3940       | 324.7006        |                |                  | 649.4018         | <b>325.2046</b>   | <b>650.4097</b>  | <b>325.7085</b>   | 5  |    |
| 11 | 1067.6572 | 534.3322       | 1050.6306      | 525.8189        | 1049.6466       | 525.3269         | 1084.6837        | 542.8455        | K    | 463.2412        |          | 537.3256  | 269.1664       | 520.2990       | 260.6532        |                |                  | <b>521.3069</b>  | 261.1571          | 522.3147         | 261.6610          | 4  |    |
| 12 | 1164.7099 | 582.8586       | 1147.6834      | 574.3453        | 1146.6994       | 573.8533         | 1181.7365        | <b>591.3719</b> | P    | 366.1884        |          | 409.2306  | 205.1190       | 392.2041       | 196.6057        |                |                  | 393.2119         | 197.1096          | 394.2197         | 197.6135          | 3  |    |
| 13 | 1301.7688 | 651.3881       | 1284.7423      | 642.8748        | 1283.7583       | 642.3828         | <b>1318.7954</b> | <b>659.9013</b> | H    |                 |          | 312.1779  | 156.5926       | 295.1513       | 148.0793        |                |                  | <b>296.1591</b>  | 148.5832          | 297.1670         | 149.0871          | 2  |    |
| 14 |           |                |                |                 |                 |                  |                  |                 | R    | 73.0284         |          | 175.1190  | 88.0631        | 158.0924       | 79.5498         |                |                  | <b>159.1002</b>  | 80.0538           | 160.1081         | 80.5577           | 1  |    |

Monoisotopic mass of neutral peptide Mr(calc): 1474.8732

Fixed modifications: Carbamidomethyl (C) (apply to specified residues or termini only)

Variable modifications:

K1 : Trimethyl (K)

Ions Score: 44 Expect: 0.03

Matches : 37/225 fragment ions using 61 most intense peaks ([help](#))

# Mascot Search Results: Peptide View

Kme3SAPATGGVKKPHR

MS/MS Fragmentation of **KSAPATGGVKKPHR**

Found in **sp|P68433|H3I\_MOUSE** in **fgcz\_10090**, Histone H3.1 OS=Mus musculus GN=Hist1h3a

Match to Query 1594: 1488.888816 from(373.229480,4+) intensity(92494.2340) scans(1888) rt(seconds)(1397.7518) index(1014)

Title: 1015: Scan 1888 (rt=23.2959) [s:\p749\Proteomics\ORBI\_2\andreamizzi\_20110517\_sperm\_trypsin\_GluC\_ETD\_CID\20110519\_01\_NaCl\_ziptipped\_1.RAW]

Data file 20110519\_01\_NaCl\_ziptipped\_1.mgf

Click mouse within plot area to zoom in by factor of two about that point

Or,  to  Da

Label all possible matches  Label matches used for scoring

Show Y-axis

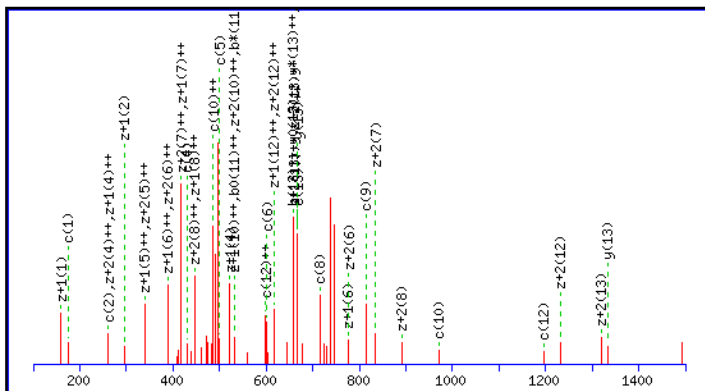

| #  | b         | b <sup>+</sup> | b <sup>+</sup> | b <sup>++</sup> | b <sup>0</sup> | b <sup>0+</sup> | c         | c <sup>+</sup> | Seq. | w         | w'       | y         | y <sup>+</sup> | y <sup>+</sup> | y <sup>++</sup> | y <sup>0</sup> | y <sup>0+</sup> | z+1       | z+1 <sup>+</sup> | z+2       | z+2 <sup>+</sup> | # |    |
|----|-----------|----------------|----------------|-----------------|----------------|-----------------|-----------|----------------|------|-----------|----------|-----------|----------------|----------------|-----------------|----------------|-----------------|-----------|------------------|-----------|------------------|---|----|
| 1  | 157.1335  | 79.0704        | 140.1070       | 70.5571         |                |                 | 174.1601  | 87.5837        | K    |           |          |           |                |                |                 |                |                 |           |                  |           |                  |   | 14 |
| 2  | 244.1656  | 122.5864       | 227.1390       | 114.0731        | 226.1550       | 113.5811        | 261.1921  | 131.0997       | S    | 1300.7484 |          | 1333.7699 | 667.3886       | 1316.7433      | 658.8753        | 1315.7593      | 658.3833        | 1317.7512 | 659.3792         | 1318.7590 | 659.8831         |   | 13 |
| 3  | 315.2027  | 158.1050       | 298.1761       | 149.5917        | 297.1921       | 149.0997        | 332.2292  | 166.6183       | A    |           |          | 1246.7379 | 623.8726       | 1229.7113      | 615.3593        | 1228.7273      | 614.8673        | 1230.7191 | 615.8632         | 1231.7270 | 616.3671         |   | 12 |
| 4  | 412.2554  | 206.6314       | 395.2289       | 198.1181        | 394.2449       | 197.6261        | 429.2820  | 215.1446       | P    | 1132.6586 |          | 1175.7008 | 588.3540       | 1158.6742      | 579.8407        | 1157.6902      | 579.3487        | 1159.6820 | 580.3447         | 1160.6899 | 580.8486         |   | 11 |
| 5  | 483.2926  | 242.1499       | 466.2660       | 233.6366        | 465.2820       | 233.1446        | 500.3191  | 250.6632       | A    |           |          | 1078.6480 | 539.8276       | 1061.6214      | 531.3144        | 1060.6374      | 530.8224        | 1062.6293 | 531.8183         | 1063.6371 | 532.3222         |   | 10 |
| 6  | 584.3402  | 292.6738       | 567.3137       | 284.1605        | 566.3297       | 283.6685        | 601.3668  | 301.1870       | T    | 974.5894  | 976.5687 | 1007.6109 | 504.3091       | 990.5843       | 495.7958        | 989.6003       | 495.3038        | 991.5922  | 496.2997         | 992.6000  | 496.8036         |   | 9  |
| 7  | 641.3617  | 321.1845       | 624.3352       | 312.6712        | 623.3511       | 312.1792        | 658.3883  | 329.6978       | G    |           |          | 906.5632  | 453.7852       | 889.5366       | 445.2720        |                |                 | 890.5445  | 445.7759         | 891.5523  | 446.2798         |   | 8  |
| 8  | 698.3832  | 349.6952       | 681.3566       | 341.1819        | 680.3726       | 340.6899        | 715.4097  | 358.2085       | G    |           |          | 849.5417  | 425.2745       | 832.5152       | 416.7612        |                |                 | 833.5230  | 417.2651         | 834.5308  | 417.7691         |   | 7  |
| 9  | 797.4516  | 399.2294       | 780.4250       | 390.7162        | 779.4410       | 390.2241        | 814.4781  | 407.7427       | V    | 761.4781  |          | 792.5203  | 396.7638       | 775.4937       | 388.2505        |                |                 | 776.5015  | 388.7544         | 777.5094  | 389.2583         |   | 6  |
| 10 | 953.5778  | 477.2926       | 936.5513       | 468.7793        | 935.5673       | 468.2873        | 970.6044  | 485.8058       | K    | 591.3362  |          | 693.4519  | 347.2296       | 676.4253       | 338.7163        |                |                 | 677.4331  | 339.2202         | 678.4410  | 339.7241         |   | 5  |
| 11 | 1081.6728 | 541.3400       | 1064.6463      | 532.8268        | 1063.6622      | 532.3348        | 1098.6994 | 549.8538       | K    | 463.2412  |          | 537.3256  | 269.1664       | 520.2990       | 260.6532        |                |                 | 521.3069  | 261.1571         | 522.3147  | 261.6610         |   | 4  |
| 12 | 1178.7256 | 589.8664       | 1161.6990      | 581.3531        | 1160.7150      | 580.8611        | 1195.7521 | 598.3797       | P    | 366.1884  |          | 409.2306  | 205.1190       | 392.2041       | 196.6057        |                |                 | 393.2119  | 197.1096         | 394.2197  | 197.6135         |   | 3  |
| 13 | 1315.7845 | 658.3959       | 1298.7579      | 649.8826        | 1297.7739      | 649.3906        | 1332.8110 | 666.9092       | H    |           |          | 312.1779  | 156.5926       | 295.1513       | 148.0793        |                |                 | 296.1591  | 148.5832         | 297.1670  | 149.0871         |   | 2  |
| 14 |           |                |                |                 |                |                 |           |                | R    | 73.0284   |          | 175.1190  | 88.0631        | 158.0924       | 79.5498         |                |                 | 159.1002  | 80.0538          | 160.1081  | 80.5577          |   | 1  |

Monoisotopic mass of neutral peptide Mr(calc): 1488.8889

Fixed modifications: Carbamidomethyl (C) (apply to specified residues or termini only)

Variable modifications:

K1 : Dimethyl\_KR (KR)

K10 : Dimethyl\_KR (KR)

Ions Score: 77 Expect: 2.4e-05

Matches : 45/225 fragment ions using 43 most intense peaks ([help](#))

## Mascot Search Results: Peptide View

Kme2SAPATGGVme2KPHR

MS/MS Fragmentation of **KSAPATGGVKKPHRYRPGTVALR**

Found in [sp|P68433|H31\\_MOUSE](#) in [fgcz\\_10090](#), Histone H3.1 OS=Mus musculus GN=Hist1h3a

Match to Query 2924: 2502.457320 from(501.498740,5+) intensity(451162.3800) scans(2374) rtinseconds(1798.6516) index(1072)

Title: 1073: Scan 2374 (rt=29.9775) [s:\p749\Proteomics\ORBI\_2\andreamizzi\_20110310\_sperm\_trypsin\_chymo\_AspN\_ETD\_CID\20110310\_04\_rep\_2h7.RAW]

Data file \\fgcz-ms.uzh.ch\p749\Proteomics\ORBI\_2\andreamizzi\_20110310\_sperm\_trypsin\_chymo\_AspN\_ETD\_CID\mgf\_low\_res\_MS2\_nomerge\20110310\_04\_rep\_2h7.mgf

Click mouse within plot area to zoom in by factor of two about that point

Or,  100 to  Da

Label all possible matches  Label matches used for scoring

Show Y-axis

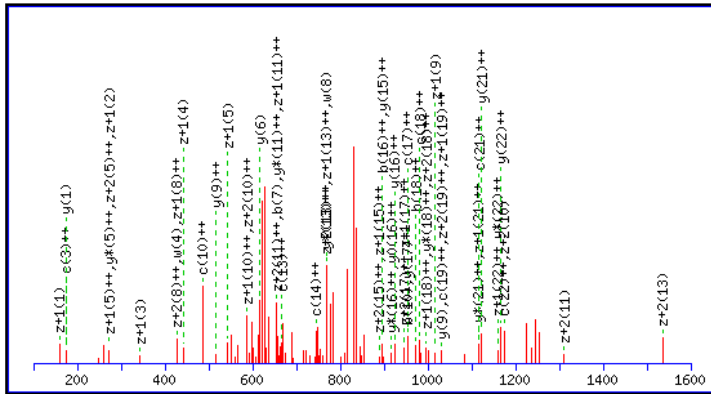

| #  | b         | b**       | b*        | b***      | b <sup>0</sup> | b <sup>++</sup> | c         | c**       | Seq. | w         | w'        | y         | y**       | y*        | y***      | y <sup>0</sup> | y <sup>++</sup> | z+1       | z+1**     | z+2       | z+2**     | #  |    |
|----|-----------|-----------|-----------|-----------|----------------|-----------------|-----------|-----------|------|-----------|-----------|-----------|-----------|-----------|-----------|----------------|-----------------|-----------|-----------|-----------|-----------|----|----|
| 1  | 171.1492  | 86.0782   | 154.1226  | 77.5650   |                | 188.1757        | 94.5915   | K         |      |           |           |           |           |           |           |                |                 |           |           |           |           |    | 23 |
| 2  | 258.1812  | 129.5942  | 241.1547  | 121.0810  | 240.1707       | 120.5890        | 275.2078  | 138.1075  | S    | 2300.3098 |           | 2333.3313 | 1167.1690 | 2316.3047 | 1158.6560 | 2315.3207      | 1158.1640       | 2317.3126 | 1159.1599 | 2318.3204 | 1159.6638 | 22 |    |
| 3  | 329.2183  | 165.1128  | 312.1918  | 156.5995  | 311.2078       | 156.1075        | 346.2449  | 173.6261  | A    |           |           | 2246.2993 | 1123.6533 | 2229.2727 | 1115.1400 | 2228.2887      | 1114.6480       | 2230.2805 | 1115.6439 | 2231.2884 | 1116.1478 | 21 |    |
| 4  | 426.2711  | 213.6992  | 409.2445  | 205.1259  | 408.2605       | 204.6339        | 443.2976  | 222.1525  | P    | 2132.2200 |           | 2175.2622 | 1088.1347 | 2158.2356 | 1079.6214 | 2157.2516      | 1079.1294       | 2159.2434 | 1080.1254 | 2160.2513 | 1080.6293 | 20 |    |
| 5  | 497.3082  | 249.1577  | 480.2817  | 240.6445  | 479.2976       | 240.1525        | 514.3348  | 257.6710  | A    |           |           | 2078.2094 | 1039.6083 | 2061.1828 | 1031.0951 | 2060.1988      | 1030.6030       | 2062.1907 | 1031.5990 | 2063.1985 | 1032.1029 | 19 |    |
| 6  | 598.3559  | 299.6816  | 581.3293  | 291.1683  | 580.3453       | 290.6763        | 615.3824  | 308.1949  | T    | 1974.1508 | 1976.1301 | 2007.1723 | 1004.0898 | 1990.1457 | 995.5765  | 1989.1617      | 995.0845        | 1991.1536 | 996.0804  | 1992.1614 | 996.5843  | 18 |    |
| 7  | 655.3774  | 328.1923  | 638.3508  | 319.6790  | 637.3668       | 319.1870        | 672.4039  | 336.7056  | G    |           |           | 1906.1246 | 953.5659  | 1889.0980 | 945.0527  | 1888.1140      | 944.5607        | 1890.1059 | 945.5666  | 1891.1137 | 946.0605  | 17 |    |
| 8  | 712.3988  | 356.7030  | 695.3723  | 348.1898  | 694.3883       | 347.6978        | 729.4254  | 365.2163  | G    |           |           | 1849.1031 | 925.0552  | 1832.0766 | 916.5410  | 1831.0926      | 916.0499        | 1833.0844 | 917.0458  | 1834.0922 | 917.5498  | 16 |    |
| 9  | 811.4672  | 406.2373  | 794.4407  | 397.7240  | 793.4567       | 397.2320        | 828.4938  | 414.7505  | V    | 1761.0395 |           | 1792.0817 | 896.5452  | 1775.0551 | 888.0312  | 1774.0711      | 887.5392        | 1776.0629 | 888.5351  | 1777.0708 | 889.0390  | 15 |    |
| 10 | 953.5778  | 477.2926  | 936.5513  | 468.7793  | 935.5673       | 468.2873        | 970.6044  | 485.8058  | K    | 1604.9132 |           | 1693.0133 | 847.0103  | 1675.9867 | 838.4970  | 1675.0027      | 838.0050        | 1676.9945 | 839.0009  | 1678.0024 | 839.5048  | 14 |    |
| 11 | 1081.6728 | 541.3400  | 1064.6643 | 532.8268  | 1063.6622      | 532.3348        | 1098.6994 | 549.8533  | K    | 1476.8182 |           | 1550.9026 | 775.9500  | 1533.8761 | 767.4417  | 1532.8921      | 766.9497        | 1534.8839 | 767.9456  | 1535.8917 | 768.4493  | 13 |    |
| 12 | 1178.7256 | 589.8664  | 1161.6990 | 581.3531  | 1160.7150      | 580.8611        | 1195.7521 | 598.3797  | P    | 1379.7655 |           | 1422.8077 | 711.9075  | 1405.7811 | 703.3942  | 1404.7971      | 702.9022        | 1406.7890 | 703.8981  | 1407.7968 | 708.4020  | 12 |    |
| 13 | 1315.7845 | 658.3959  | 1298.7579 | 649.8826  | 1297.7399      | 649.3906        | 1332.8110 | 666.8092  | H    |           |           | 1325.7549 | 663.3811  | 1308.7284 | 654.8676  | 1307.7443      | 654.7538        | 1309.7362 | 655.3777  | 1310.7440 | 655.8756  | 11 |    |
| 14 | 1471.8856 | 736.4464  | 1454.8590 | 727.9332  | 1453.8750      | 727.4412        | 1488.9121 | 744.9597  | R    | 1086.6055 |           | 1188.6960 | 594.8516  | 1171.6695 | 586.3384  | 1170.6854      | 585.8464        | 1172.6773 | 586.8423  | 1173.6851 | 587.3462  | 10 |    |
| 15 | 1634.9489 | 817.9781  | 1617.9224 | 809.4648  | 1616.9384      | 808.9728        | 1651.9755 | 826.4914  | Y    |           |           | 1032.5949 | 516.8011  | 1015.5683 | 508.2878  | 1014.5843      | 507.7958        | 1016.5762 | 508.7917  | 1017.5840 | 509.2956  | 9  |    |
| 16 | 1791.0500 | 896.0287  | 1774.0235 | 887.5154  | 1773.0395      | 887.0234        | 1808.0766 | 904.5419  | R    | 767.4410  |           | 869.5316  | 435.2694  | 852.5050  | 426.5761  | 851.5210       | 426.2641        | 853.5128  | 427.2607  | 854.5207  | 427.7640  | 8  |    |
| 17 | 1888.1028 | 944.5550  | 1871.0762 | 936.0418  | 1870.0922      | 935.5498        | 1905.1293 | 953.0683  | P    | 670.3883  |           | 713.4305  | 357.2189  | 696.4039  | 348.7056  | 695.4199       | 348.2136        | 697.4117  | 349.2095  | 698.4196  | 349.7134  | 7  |    |
| 18 | 1945.1243 | 973.0658  | 1928.0977 | 964.5525  | 1927.1137      | 964.0605        | 1962.1508 | 981.5790  | P    |           |           | 616.3777  | 308.6925  | 599.3511  | 300.1792  | 598.3671       | 299.6872        | 600.3590  | 300.6831  | 601.3668  | 301.870   | 6  |    |
| 19 | 2046.1719 | 1023.5896 | 2029.1454 | 1015.0763 | 2028.1614      | 1014.5843       | 2063.1985 | 1082.1029 | T    | 526.3348  | 528.3140  | 559.3562  | 280.1817  | 542.3297  | 271.6685  | 541.3457       | 271.1765        | 543.3375  | 272.1724  | 544.3453  | 272.6763  | 5  |    |
| 20 | 2145.2044 | 1073.1238 | 2128.2138 | 1064.6105 | 2127.2298      | 1064.1185       | 2162.2669 | 1081.6371 | V    | 427.2663  |           | 458.3085  | 229.6579  | 441.2820  | 221.1446  |                |                 | 442.2898  | 221.6485  | 443.2976  | 222.1525  | 4  |    |
| 21 | 2216.2275 | 1108.6424 | 2199.2509 | 1100.1291 | 2198.2669      | 1099.6371       | 2233.3040 | 1117.1556 | A    |           |           | 359.2401  | 180.1237  | 342.2136  | 171.6104  |                |                 | 343.2214  | 172.1143  | 344.2292  | 172.6183  | 3  |    |
| 22 | 2329.3615 | 1165.1844 | 2312.3350 | 1156.6711 | 2311.3510      | 1156.1791       | 2346.3881 | 1173.6977 | L    | 229.1295  |           | 288.2030  | 144.6051  | 271.1765  | 136.0919  |                |                 | 272.1843  | 136.5958  | 273.1921  | 137.0997  | 2  |    |
| 23 |           |           |           |           |                |                 |           |           | R    | 73.0284   |           | 175.1190  | 88.0631   | 158.0924  | 79.5498   |                |                 | 159.1002  | 80.0538   | 160.1081  | 80.5577   | 1  |    |

Monoisotopic mass of neutral peptide Mr(calc): 2502.4659

Fixed modifications: Carbamidomethyl (C) (apply to specified residues or termini only)

Variable modifications:

K1 : Trimethyl (K)

K10 : Methyl\_KR (KR)

Ions Score: 60 Expect: 0.0039

Matches : 61/402 fragment ions using 66 most intense peaks ([help](#))

# Mascot Search Results: Peptide View

Kme3SAPATGGVkmE1KPHRYRPGTVALR

MS/MS Fragmentation of **KSAPATGGVKKPHRYRPGTVALR**

Found in **sp|P68433|H31\_MOUSE** in **fgcz\_10090**, Histone H3.1 OS=Mus musculus GN=Hist1h3a

Match to Query 5413: 2502.467136 from(626.624060,4+) intensity(60804.8090) scans(2553) rtinseconds(1890.4771) index(1122)

Title: 978: Scan 2553 (t=31.508) [s:p749\Proteomics\ORBI\_2\andreamizzi\_20110310\_sperm\_trypsin\_chymo\_AspN\_ETD\_CID\20110311\_37\_NaCl\_trypsin\_SCX\_3.RAW]

Data file Y:\p749\Proteomics\Mascot\mgr50\_20110426\_sperm\_rerun\_trypsin\_2nd\_ETD\_run\_NaCl\_SCX\mascot\_daemon\_merge.mgf

Click mouse within plot area to zoom in by factor of two about that point

Or,  to  Da

Label all possible matches  Label matches used for scoring

Show Y-axis

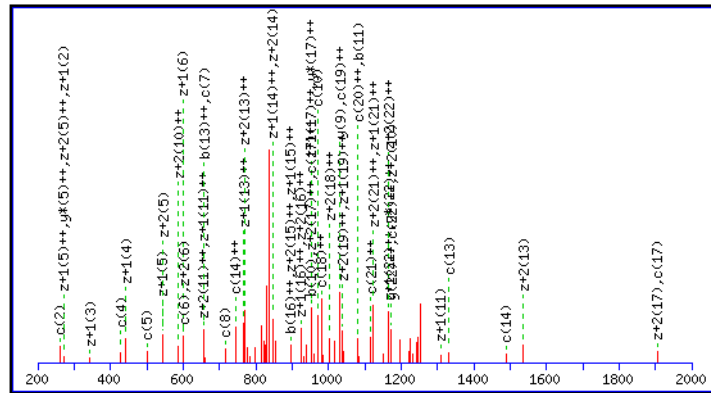

**Monoisotopic mass of neutral peptide Mr(calc): 2502.4659**

**Fixed modifications:** Carbamidomethyl (C) (apply to specified residues or termini only)

**Variable modifications:**

**K1** : Dimethyl\_KR (KR)

**K10** : Dimethyl\_KR (KR)

**Ions Score:** 101 **Expect:** 2.9e-07

**Matches :** 59/402 fragment ions using 45 most intense peaks ([help](#))

| #  | b                | b <sup>++</sup> | b <sup>+</sup> | b <sup>+++</sup> | b <sup>0</sup> | b <sup>0++</sup> | c                | c <sup>++</sup>  | Seq. | w         | w'        | y                | y <sup>++</sup>  | y <sup>+</sup> | y <sup>+++</sup> | y <sup>0</sup> | y <sup>0++</sup> | z+1              | z+1 <sup>++</sup> | z+2              | z+2 <sup>++</sup> | #  |    |
|----|------------------|-----------------|----------------|------------------|----------------|------------------|------------------|------------------|------|-----------|-----------|------------------|------------------|----------------|------------------|----------------|------------------|------------------|-------------------|------------------|-------------------|----|----|
| 1  | 157.1335         | 79.0704         | 140.1070       | 70.5571          |                |                  | 174.1601         | 87.5837          | K    |           |           |                  |                  |                |                  |                |                  |                  |                   |                  |                   |    | 23 |
| 2  | 244.1656         | 122.5864        | 227.1390       | 114.0731         | 226.1550       | 113.5811         | <b>261.1921</b>  | 131.0997         | E    | 2314.3255 |           | 2347.3469        | <b>1174.1771</b> | 2330.3204      | <b>1165.6630</b> | 2229.3364      | 1165.1718        | 2331.3282        | <b>1166.1677</b>  | 2332.3360        | <b>1166.6717</b>  | 22 |    |
| 3  | 315.2027         | 158.1050        | 298.1761       | 149.5917         | 297.1921       | 149.0997         | 332.2292         | 166.6183         | A    |           |           | 2260.3149        | 1130.6611        | 2243.2884      | 1122.1478        | 2242.3044      | 1121.6558        | 2244.2962        | <b>1122.6517</b>  | 2245.3040        | <b>1123.1556</b>  | 21 |    |
| 4  | 412.2554         | 206.6314        | 395.2289       | 198.1181         | 394.2449       | 197.6261         | <b>429.2820</b>  | 215.1446         | P    | 2146.2356 |           | 2189.2778        | 1095.1425        | 2172.2513      | 1086.6293        | 2171.2672      | 1086.1373        | 2173.2591        | 1087.1332         | 2174.2669        | 1087.6371         | 20 |    |
| 5  | 483.2926         | 242.1499        | 466.2660       | 233.6366         | 465.2820       | 233.1446         | <b>500.3191</b>  | 250.6632         | A    |           |           | 2092.2250        | 1046.6162        | 2075.1985      | 1038.1029        | 2074.2145      | 1037.6109        | 2076.2063        | <b>1038.6068</b>  | 2077.2141        | <b>1039.1107</b>  | 19 |    |
| 6  | 584.3402         | 292.6738        | 567.3137       | 284.1605         | 566.3297       | 283.6685         | <b>601.3668</b>  | 301.1870         | T    | 1988.1665 | 1990.1457 | 2021.1879        | 1011.0976        | 2004.1614      | 1002.5843        | 2003.1774      | 1002.0923        | 2005.1692        | 1003.0882         | 2006.1770        | <b>1003.5922</b>  | 18 |    |
| 7  | 641.3617         | 321.1845        | 624.3352       | 312.6712         | 623.3511       | 312.1792         | <b>658.3883</b>  | 329.6978         | G    |           |           | 1920.1402        | 960.5738         | 1903.1137      | <b>952.0605</b>  | 1902.1297      | 951.5685         | 1904.1215        | <b>952.5644</b>   | <b>1905.1293</b> | <b>953.0683</b>   | 17 |    |
| 8  | 698.3832         | 349.6952        | 681.3566       | 341.1819         | 680.3726       | 340.6899         | <b>715.4097</b>  | 358.2085         | G    |           |           | 1863.1188        | 932.0630         | 1846.0922      | 923.5498         | 1845.1082      | 923.0577         | 1847.1001        | <b>924.0537</b>   | 1848.1079        | <b>924.5576</b>   | 16 |    |
| 9  | 797.4516         | 399.2294        | 780.4250       | 390.7162         | 779.4410       | 390.2241         | 814.4781         | 407.7427         | V    | 1775.0551 |           | 1806.0973        | 903.5523         | 1789.0708      | 895.0390         | 1788.0868      | 894.5470         | 1790.0786        | <b>895.5429</b>   | 1791.0864        | <b>896.0468</b>   | 15 |    |
| 10 | <b>933.5778</b>  | 477.2926        | 936.5153       | 468.7793         | 935.5672       | 468.2873         | <b>970.6044</b>  | 485.8058         | K    | 1604.9132 |           | 1707.0289        | 854.0181         | 1690.0024      | 845.5048         | 1689.0183      | 845.0128         | 1691.0102        | <b>846.0087</b>   | 1692.0180        | <b>846.5126</b>   | 14 |    |
| 11 | <b>1081.6728</b> | 541.3400        | 1064.6463      | 532.8268         | 1063.6622      | 532.3348         | 1098.6994        | 549.8333         | K    | 1476.8182 |           | 1550.9026        | 775.9550         | 1533.8761      | 767.4417         | 1532.8921      | 766.9497         | 1534.8839        | <b>767.9456</b>   | <b>1535.8917</b> | <b>768.4495</b>   | 13 |    |
| 12 | 1178.7256        | 589.8664        | 1161.6990      | 581.3531         | 1160.7150      | 580.8611         | 1195.7521        | 598.3797         | P    | 1379.7655 |           | 1422.8077        | 711.9075         | 1405.7811      | 703.3942         | 1404.7971      | 702.9022         | 1406.7890        | 703.8981          | 1407.7968        | 704.4020          | 12 |    |
| 13 | 1315.7845        | <b>658.3959</b> | 1298.7579      | 649.8826         | 1297.7739      | 649.3906         | <b>1332.8110</b> | 666.9092         | H    |           |           | 1325.7549        | 663.8811         | 1308.7284      | 654.8678         | 1307.7443      | 654.3758         | <b>1309.7362</b> | <b>655.3717</b>   | 1310.7440        | <b>655.8756</b>   | 11 |    |
| 14 | 1471.8856        | 736.4464        | 1454.8500      | 727.9332         | 1453.8750      | 727.4412         | <b>1488.9121</b> | <b>744.9597</b>  | P    | 1086.6055 |           | 1188.6960        | 594.8516         | 1171.6695      | 586.3384         | 1170.6854      | 585.8464         | 1172.6773        | 586.8423          | <b>1173.6851</b> | <b>587.3462</b>   | 10 |    |
| 15 | 1634.9489        | 817.8791        | 1617.9224      | 809.4648         | 1616.9384      | 808.9728         | 1651.9755        | 826.4914         | Y    |           |           | <b>1032.5940</b> | 516.8011         | 1015.5683      | 508.2878         | 1014.5843      | 507.7958         | 1016.5762        | 508.7917          | 1017.5840        | 509.2956          | 9  |    |
| 16 | 1791.0500        | <b>896.0287</b> | 1774.0235      | 887.5154         | 1773.0395      | 887.0234         | 1808.0766        | 904.5419         | P    | 767.4410  |           | 869.5316         | 435.2694         | 852.5050       | 426.7561         | 851.5210       | 426.2641         | 853.5128         | 427.2601          | 854.5207         | 427.7640          | 8  |    |
| 17 | 1888.1028        | 944.5550        | 1871.0762      | 936.0418         | 1870.0922      | 935.5498         | <b>1905.1293</b> | <b>953.0683</b>  | P    | 670.3883  |           | 713.4305         | 357.2189         | 696.4039       | 348.7056         | 695.4199       | 348.2136         | 697.4117         | 349.2095          | 698.4196         | 349.7134          | 7  |    |
| 18 | 1945.1243        | 973.0658        | 1928.0977      | 964.5525         | 1927.1137      | 964.0605         | 1962.1508        | <b>981.5790</b>  | G    |           |           | 616.3777         | 308.6925         | 599.3511       | 300.1792         | 598.3671       | 299.6872         | <b>600.3590</b>  | 300.6831          | <b>601.3668</b>  | 301.1870          | 6  |    |
| 19 | 2046.1719        | 1023.5896       | 2029.1454      | 1015.0763        | 2028.1614      | 1014.5843        | 2063.1985        | <b>1032.1029</b> | T    | 526.3348  | 528.3140  | 559.3562         | 280.1817         | 542.3297       | <b>271.6685</b>  | 541.3457       | 271.1765         | <b>543.3375</b>  | <b>272.1724</b>   | <b>544.3433</b>  | <b>272.6763</b>   | 5  |    |
| 20 | 2145.2404        | 1073.1238       | 2128.2138      | 1064.6105        | 2127.2298      | 1064.1185        | 2162.2669        | <b>1081.6371</b> | V    | 427.2663  |           | 458.3085         | 229.6579         | 441.2820       | 221.1446         |                |                  | <b>442.2898</b>  | 221.6485          | 443.2976         | 222.1525          | 4  |    |
| 21 | 2216.2775        | 1108.6424       | 2199.2509      | 1100.1291        | 2198.2669      | 1099.6371        | 2233.3040        | <b>1117.1556</b> | A    |           |           | 359.2401         | 180.1237         | 342.2136       | 171.6104         |                |                  | <b>343.2214</b>  | 172.1143          | 344.2292         | 172.6183          | 3  |    |
| 22 | 2329.3615        | 1165.1844       | 2312.3350      | 1156.6711        | 2311.3510      | 1156.1791        | 2346.3881        | <b>1173.6977</b> | L    | 229.1295  |           | 288.2030         | 144.6051         | 271.1765       | 136.0919         |                |                  | <b>272.1843</b>  | 136.5958          | 273.1921         | 137.0997          | 2  |    |
| 23 |                  |                 |                |                  |                |                  |                  |                  | R    | 73.0284   |           | 175.1190         | 88.0631          | 158.0924       | 79.5498          |                |                  | 159.1002         | 80.0538           | 160.1081         | 80.5577           | 1  |    |

# Mascot Search Results: Peptide View

Kme2SAPATGGVKKme2KPHRYRPGTVALR

MS/MS Fragmentation of **KSPATGGVKKPHRYRPGTVALR**

Found in [sp|P68433|H3L\\_MOUSE](#) in [fgcz\\_10090](#), Histone H3.1 OS=Mus musculus GN=Hist1h3a

Match to Query 3897: 2488.450170 from(498.697310,5+) intensity(304093.7800) scans(3368) rtinseconds(1967.9339) index(2096)

Title: 2097: Scan 3368 (rt=32.7989) [s:\p749\Proteomics\ORBI\_2\andreamizzi\_20110517\_sperm\_trypsin\_GluC\_ETD\_CID\20110517\_01\_NaCl\_1.RAW]

Data file 20110517\_01\_NaCl\_1.mgf

Click mouse within plot area to zoom in by factor of two about that point

Or,  to  Da

Label all possible matches  Label matches used for scoring

Show Y-axis

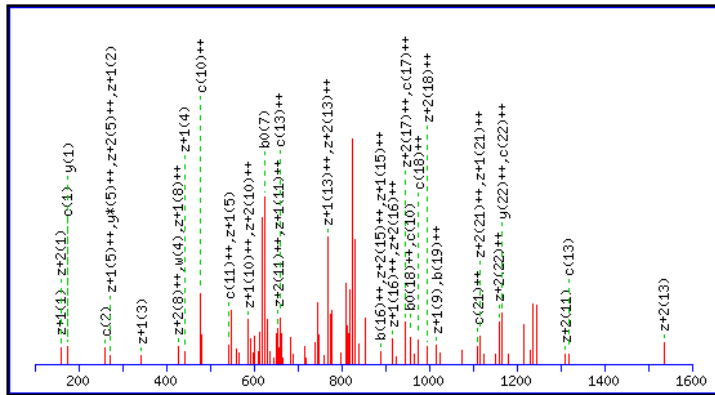

| #  | b         | b**              | b*        | b**       | b°              | b**             | c                | c**              | Seq. | w               | w'        | y         | y**              | y*        | y**             | y°        | y°**      | z+1              | z+1**            | z+2              | z+2**            | #       |    |
|----|-----------|------------------|-----------|-----------|-----------------|-----------------|------------------|------------------|------|-----------------|-----------|-----------|------------------|-----------|-----------------|-----------|-----------|------------------|------------------|------------------|------------------|---------|----|
| 1  | 157.1335  | 79.0704          | 140.1070  | 70.5571   |                 |                 | <b>174.1601</b>  | 87.5837          | K    |                 |           |           |                  |           |                 |           |           |                  |                  |                  |                  |         | 23 |
| 2  | 244.1656  | 122.5864         | 227.1390  | 114.0731  | 226.1550        | 113.5811        | <b>261.1921</b>  | 131.0997         | S    | 2300.3098       |           | 2333.3313 | <b>1167.1693</b> | 2316.3047 | 1158.6560       | 2315.3207 | 1158.1640 | 2317.3126        | 1159.1599        | 2318.3204        | <b>1159.6638</b> | 22      |    |
| 3  | 315.2027  | 158.1050         | 298.1761  | 149.5917  | 297.1921        | 149.0997        | 332.2292         | 166.6183         | A    |                 |           | 2246.2993 | 1123.6533        | 2229.2727 | 1115.1400       | 2228.2887 | 1114.6480 | 2230.2805        | <b>1115.6439</b> | 2231.2884        | <b>1116.1478</b> | 21      |    |
| 4  | 412.2554  | 206.6314         | 395.2289  | 198.1181  | 394.2449        | 197.6261        | 429.2820         | 215.1446         | P    | 2132.2200       |           | 2175.2622 | 1088.1347        | 2158.2356 | 1079.6214       | 2157.2516 | 1079.1294 | 2159.2434        | 1080.1254        | 2160.2513        | 1080.6293        | 20      |    |
| 5  | 483.2926  | 242.1499         | 466.2660  | 233.6366  | 465.2820        | 233.1446        | 500.3191         | 250.6632         | A    |                 |           | 2078.2094 | 1039.6083        | 2061.1828 | 1031.0951       | 2060.1988 | 1030.6030 | 2062.1907        | 1031.5990        | 2063.1985        | 1032.1029        | 19      |    |
| 6  | 584.3402  | 292.6738         | 567.3137  | 284.1605  | 566.3297        | 283.6685        | 601.3668         | 301.1870         | T    | 1974.1508       | 1976.1301 | 2007.1723 | 1004.0898        | 1990.1457 | 995.5765        | 1989.1617 | 995.0845  | 1991.1536        | 996.0804         | 1992.1614        | <b>996.5843</b>  | 18      |    |
| 7  | 641.3617  | 321.1845         | 624.3352  | 312.6712  | <b>623.3511</b> | 312.1792        | 658.3883         | 329.6978         | G    |                 |           | 1906.1246 | 953.5659         | 1889.0980 | 945.0527        | 1888.1140 | 944.5607  | 1890.1059        | 945.5566         | 1891.1137        | <b>946.0605</b>  | 17      |    |
| 8  | 698.3832  | 349.6952         | 681.3566  | 341.1819  | 680.3726        | 340.6899        | 715.4097         | 358.2085         | G    |                 |           | 1849.1031 | 925.0552         | 1832.0766 | 916.5419        | 1831.0926 | 916.0499  | 1833.0844        | <b>917.0458</b>  | 1834.0922        | <b>917.5498</b>  | 16      |    |
| 9  | 797.4516  | 399.2294         | 780.4250  | 390.7162  | 779.4410        | 390.2241        | 814.4781         | 407.7427         | V    | 1761.0395       |           | 1792.0817 | 896.5445         | 1775.0551 | 888.0312        | 1774.0711 | 887.5392  | 1776.0629        | <b>888.5351</b>  | 1777.0708        | <b>889.0390</b>  | 15      |    |
| 10 | 939.5622  | 470.2847         | 922.5356  | 461.7715  | 921.5516        | 461.2795        | <b>956.5887</b>  | <b>478.7980</b>  | K    | 1604.9132       |           | 1693.0133 | 847.0103         | 1675.9867 | 838.4970        | 1675.0027 | 838.0050  | 1676.9945        | 839.0009         | 1678.0024        | 839.5048         | 14      |    |
| 11 | 1067.6572 | 534.3322         | 1050.6306 | 525.8189  | 1049.6466       | 525.3269        | 1084.6837        | <b>542.8455</b>  | K    | 1476.8182       |           | 1550.9026 | 775.9550         | 1533.8761 | 767.4417        | 1532.8921 | 766.9497  | 1534.8839        | <b>767.9456</b>  | <b>1535.8917</b> | <b>768.4495</b>  | 13      |    |
| 12 | 1164.7099 | 582.8586         | 1147.6834 | 574.3453  | 1146.6994       | 573.8533        | 1181.7365        | 591.3719         | P    | 1379.7655       |           | 1422.8077 | 711.9075         | 1405.7811 | 703.3942        | 1404.7971 | 702.9022  | 1406.7890        | 703.8981         | 1407.7968        | 704.4020         | 12      |    |
| 13 | 1301.7688 | 651.3881         | 1284.7423 | 642.8748  | 1283.7583       | 642.3828        | <b>1318.7954</b> | <b>659.9013</b>  | H    |                 |           | 1325.7549 | 663.8811         | 1308.7284 | 654.8678        | 1307.7443 | 654.3758  | 1309.7362        | <b>655.3717</b>  | <b>1310.7440</b> | <b>655.8756</b>  | 11      |    |
| 14 | 1457.8699 | 729.4386         | 1440.8434 | 720.9253  | 1439.8594       | 720.4333        | 1474.8965        | 737.9519         | R    | 1086.6055       |           | 1188.6960 | 594.8516         | 1171.6695 | 586.3384        | 1170.6854 | 585.8464  | 1172.6773        | <b>586.8423</b>  | 1173.6851        | <b>587.3462</b>  | 10      |    |
| 15 | 1620.9333 | 810.9703         | 1603.9067 | 802.4570  | 1602.9227       | 801.9650        | 1637.9598        | 819.4835         | Y    |                 |           | 1032.5949 | 516.8011         | 1015.5683 | 508.2878        | 1014.5843 | 507.7958  | <b>1016.5762</b> | 508.7917         | 1017.5840        | 509.2956         | 9       |    |
| 16 | 1777.0344 | <b>889.0208</b>  | 1760.0078 | 880.5076  | 1759.0238       | 880.0155        | 1794.0609        | 897.5341         | R    | 767.4410        |           | 869.5316  | 435.2694         | 852.5500  | 426.7561        | 851.5210  | 426.2641  | 853.5128         | <b>427.2601</b>  | 854.5207         | <b>427.7640</b>  | 8       |    |
| 17 | 1874.0871 | 937.5472         | 1857.0606 | 929.0339  | 1856.0766       | 928.5419        | 1891.1137        | <b>946.0605</b>  | P    | 670.3883        |           | 713.4305  | 357.2189         | 696.4039  | 348.7056        | 695.4199  | 348.2136  | 697.4117         | 349.2095         | 698.4196         | 349.7134         | 7       |    |
| 18 | 1931.1086 | 966.0579         | 1914.0821 | 957.5447  | 1913.0980       | <b>957.0527</b> | 1948.1352        | <b>974.5712</b>  | G    |                 |           | 616.3777  | 308.6925         | 599.3511  | 300.1792        | 598.3671  | 299.6872  | 600.3590         | 300.6831         | 601.3668         | 301.1870         | 6       |    |
| 19 | 2032.1563 | <b>1016.3818</b> | 2015.1297 | 1008.0685 | 2014.1457       | 1007.5765       | 2049.1828        | 1025.0951        | T    | 526.3348        | 528.3140  | 559.3562  | 280.1817         | 542.3297  | <b>271.6685</b> | 541.3457  | 271.7165  | <b>543.3375</b>  | <b>272.1724</b>  | <b>544.3453</b>  | <b>272.6763</b>  | 5       |    |
| 20 | 2131.2247 | 1066.1160        | 2114.1982 | 1057.6027 | 2113.2141       | 1057.1107       | 2148.2513        | 1074.6293        | V    | <b>427.2663</b> |           | 458.3085  | 229.6579         | 441.2820  | 221.1446        |           |           | <b>442.2898</b>  | 221.6485         | 443.2976         | 222.1525         | 4       |    |
| 21 | 2202.2618 | 1101.6345        | 2185.2353 | 1093.1213 | 2184.2513       | 1092.6293       | 2219.2884        | <b>1110.1478</b> | A    |                 |           | 359.2401  | 180.1237         | 342.2136  | 171.6104        |           |           | <b>343.2214</b>  | 172.1143         | 344.2292         | 172.1813         | 3       |    |
| 22 | 2315.3459 | 1158.1766        | 2298.3193 | 1149.6633 | 2297.3353       | 1149.1713       | 2332.3724        | <b>1166.6899</b> | L    | 229.1295        |           | 288.2030  | 144.6051         | 271.1765  | 136.0919        |           |           | <b>272.1843</b>  | 136.5958         | 273.1921         | 137.0997         | 2       |    |
| 23 |           |                  |           |           |                 |                 |                  |                  | R    | 73.0284         |           |           | <b>175.1190</b>  | 88.0631   | 158.0924        | 79.5498   |           |                  | <b>159.1002</b>  | 80.0538          | <b>160.1081</b>  | 80.5577 | 1  |

Monoisotopic mass of neutral peptide Mr(calc): 2488.4503

Fixed modifications: Carbamidomethyl (C) (apply to specified residues or termini only)

Variable modifications:

K1 : Dimethyl\_KR (KR)

K10 : Methyl\_KR (KR)

Ions Score: 56 Expect: 0.00099

Matches : 47/402 fragment ions using 51 most intense peaks ([help](#))

## Mascot Search Results: Peptide View

Kme2SPATGGVKKme1KPHRYRPGTVALR

MS/MS Fragmentation of **KSAPATGGVKKPHRYRPGTVALR**

Found in **sp|P68433|H3I\_MOUSE** in **fgcz\_10090**, Histone H3.1 OS=Mus musculus GN=Hist1h3a

Match to Query 3958: 2474.434336 from(619.615860,4+) intensity(225884.6300) scans(3134) rtinseconds(1935.5212) index(1903)

Title: 1904: Scan 3134 (rt=32.2587) [s:p749\Proteomics\ORBI\_2\andreamizzi\_20110517\_sperm\_trypsin\_GluC\_ETD\_CID\20110519\_02\_NaCl\_ziptipped\_2.RAW]

Data file 20110519\_02\_NaCl\_ziptipped\_2.mgf

Click mouse within plot area to zoom in by factor of two about that point

Or, Plot from  to  Da

Label all possible matches  Label matches used for scoring

Show Y-axis

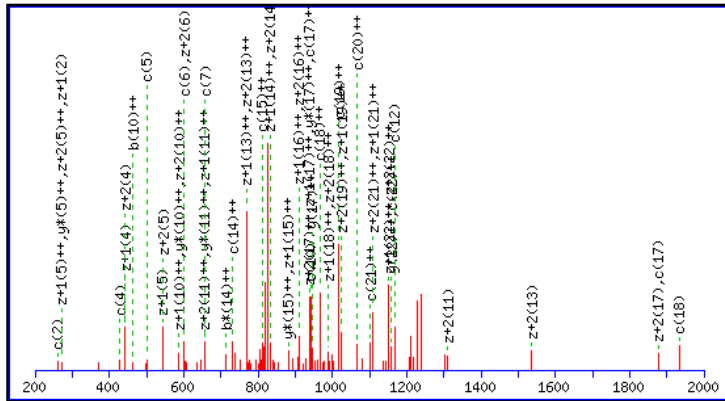

| #  | b         | b**             | b*        | b***            | b <sup>0</sup> | b <sup>0**</sup> | c                | c**              | Seq. | w         | w'        | y         | y**              | y*        | y***            | y <sup>0</sup> | y <sup>0**</sup> | z+1             | z+1**            | z+2              | z+2**            | #  |    |
|----|-----------|-----------------|-----------|-----------------|----------------|------------------|------------------|------------------|------|-----------|-----------|-----------|------------------|-----------|-----------------|----------------|------------------|-----------------|------------------|------------------|------------------|----|----|
| 1  | 157.1335  | 79.0704         | 140.1070  | 70.5571         |                |                  | 174.1601         | 87.5837          | K    |           |           |           |                  |           |                 |                |                  |                 |                  |                  |                  |    | 23 |
| 2  | 244.1656  | 122.5864        | 227.1390  | 114.0731        | 226.1550       | 113.5811         | <b>261.1921</b>  | 131.0997         | S    | 2286.2942 |           | 2319.3156 | <b>1160.1615</b> | 2302.2891 | 1151.6482       | 2301.3051      | 1151.1562        | 2302.2969       | <b>1152.1521</b> | 2304.3047        | <b>1152.6560</b> | 22 |    |
| 3  | 315.2027  | 158.1050        | 298.1761  | 149.5917        | 297.1921       | 149.0997         | 332.2292         | 166.6183         | A    |           |           | 2232.2836 | 1116.6454        | 2215.2571 | 1108.1322       | 2214.2731      | 1107.6402        | 2216.2649       | <b>1108.6361</b> | 2217.2727        | <b>1109.1400</b> | 21 |    |
| 4  | 412.2554  | 206.6314        | 395.2289  | 198.1181        | 394.2449       | 197.6261         | <b>429.2820</b>  | 215.1446         | P    | 2118.2043 |           | 2161.2465 | 1081.1269        | 2144.2200 | 1072.6136       | 2143.2359      | 1072.1216        | 2145.2278       | 1073.1175        | 2146.2356        | <b>1073.6214</b> | 20 |    |
| 5  | 483.2926  | 242.1499        | 466.2660  | 233.6366        | 465.2820       | 233.1446         | <b>500.3191</b>  | 250.6632         | A    |           |           | 2064.1937 | 1032.6005        | 2047.1672 | 1024.0872       | 2046.1832      | 1023.5952        | 2048.1750       | <b>1024.5911</b> | 2049.1828        | <b>1025.0951</b> | 19 |    |
| 6  | 584.3402  | 292.6738        | 567.3137  | 284.1605        | 566.3297       | 283.6685         | <b>601.3668</b>  | 301.1870         | T    | 1960.1352 | 1962.1144 | 1993.1566 | 997.0820         | 1976.1301 | 988.5687        | 1975.1461      | 988.0767         | 1977.1379       | <b>989.0726</b>  | 1978.1457        | <b>989.5765</b>  | 18 |    |
| 7  | 641.3617  | 321.1845        | 624.3352  | 312.6712        | 623.3511       | 312.1792         | <b>658.3883</b>  | 329.6978         | G    |           |           | 1892.1089 | <b>946.5581</b>  | 1875.0824 | <b>938.0448</b> | 1874.0984      | 937.5528         | 1876.0902       | <b>938.5487</b>  | <b>1877.0980</b> | <b>939.0527</b>  | 17 |    |
| 8  | 698.3832  | 349.6952        | 681.3566  | 341.1819        | 680.3726       | 340.6899         | 715.4097         | 358.2085         | G    |           |           | 1835.0875 | 918.0474         | 1818.0609 | 909.5341        | 1817.0769      | 909.0421         | 1819.0688       | <b>910.6380</b>  | 1820.0766        | <b>910.5419</b>  | 16 |    |
| 9  | 797.4516  | 399.2294        | 780.4250  | 390.7162        | 779.4410       | 390.2241         | 814.4781         | 407.7427         | V    | 1747.0238 |           | 1778.0660 | 889.5366         | 1761.0395 | <b>881.0234</b> | 1760.0555      | 880.5314         | 1762.0473       | <b>881.5273</b>  | 1763.0551        | <b>882.0312</b>  | 15 |    |
| 10 | 925.5465  | <b>463.2679</b> | 908.5200  | 454.7636        | 907.5360       | 454.2716         | <b>942.5731</b>  | 471.7902         | K    | 1604.9132 |           | 1678.9976 | 840.0024         | 1661.9711 | 831.4892        | 1660.9870      | 830.9972         | 1662.9789       | <b>831.9931</b>  | 1663.9867        | <b>832.4970</b>  | 14 |    |
| 11 | 1053.6415 | 527.3244        | 1036.6150 | 518.8111        | 1035.6309      | 518.3191         | 1070.6681        | 535.8377         | K    | 1476.8182 |           | 1550.9026 | 775.9550         | 1533.8761 | 767.4417        | 1532.8921      | 766.9497         | 1534.8839       | <b>767.9456</b>  | <b>1535.8917</b> | <b>768.4495</b>  | 13 |    |
| 12 | 1150.6943 | 575.8508        | 1133.6677 | 567.3375        | 1132.6837      | 566.8455         | <b>1167.7208</b> | 584.3640         | P    | 1379.7655 |           | 1422.8077 | 711.9075         | 1405.7811 | 703.3942        | 1404.7971      | 702.9022         | 1406.7890       | 703.8981         | 1407.7968        | <b>704.4020</b>  | 12 |    |
| 13 | 1287.7532 | 644.3802        | 1270.7266 | 635.8670        | 1269.7426      | 635.3749         | 1304.7797        | 652.8935         | H    |           |           | 1325.7549 | 663.3811         | 1308.7284 | <b>654.8678</b> | 1307.7443      | 654.3758         | 1309.7362       | <b>655.3717</b>  | <b>1310.7440</b> | <b>655.8756</b>  | 11 |    |
| 14 | 1443.8543 | 722.4308        | 1426.8277 | <b>713.9175</b> | 1425.8437      | 713.4255         | 1460.8808        | <b>730.9441</b>  | R    | 1086.6055 |           | 1188.6960 | 594.8516         | 1171.6695 | <b>586.3384</b> | 1170.6854      | 585.8464         | 1172.6773       | <b>586.8423</b>  | 1173.6851        | <b>587.3462</b>  | 10 |    |
| 15 | 1606.9176 | 803.9624        | 1589.8911 | 795.4492        | 1588.9071      | 794.9572         | 1623.9442        | <b>812.4757</b>  | Y    |           |           | 1032.5949 | 516.8011         | 1015.5683 | 508.2878        | 1014.5843      | 507.7958         | 1016.5762       | 508.7917         | 1017.5840        | <b>509.2956</b>  | 9  |    |
| 16 | 1763.0187 | 882.0130        | 1745.9922 | 873.4997        | 1745.0082      | 873.0077         | 1780.0453        | 890.5263         | R    | 767.4410  |           | 869.5316  | 435.2694         | 852.5050  | 426.7561        | 851.5210       | 426.2641         | 853.5128        | 427.2601         | 854.5207         | <b>427.7640</b>  | 8  |    |
| 17 | 1860.0715 | 930.5394        | 1843.0449 | 922.0261        | 1842.0609      | 921.5341         | <b>1877.0980</b> | <b>939.0527</b>  | P    | 670.3883  |           | 713.4305  | 357.2189         | 696.4039  | 348.7056        | 695.4199       | 348.2136         | 697.4117        | 349.2095         | 698.4196         | <b>349.7134</b>  | 7  |    |
| 18 | 1917.0930 | 959.0501        | 1900.0664 | 950.5368        | 1899.0824      | 950.0448         | <b>1934.1195</b> | <b>967.5634</b>  | G    |           |           | 616.3777  | 308.6925         | 599.3511  | 300.1792        | 598.3671       | 299.6872         | 600.3590        | 300.6831         | <b>601.3668</b>  | 301.1870         | 6  |    |
| 19 | 2018.1406 | 1009.5740       | 2001.1141 | 1001.0607       | 2000.1301      | 1000.5687        | 2035.1672        | <b>1018.0872</b> | V    | 526.3348  | 528.3140  | 559.3562  | 280.1817         | 542.3297  | <b>271.6685</b> | 541.3457       | 271.1765         | <b>543.3375</b> | <b>272.724</b>   | <b>544.3453</b>  | <b>272.6753</b>  | 5  |    |
| 20 | 2117.2091 | 1059.1082       | 2100.1825 | 1050.5949       | 2099.1985      | 1050.1029        | 2134.2352        | <b>1067.6214</b> | V    | 427.2663  |           | 458.3085  | 229.6579         | 441.2820  | 221.1446        |                |                  | <b>442.2898</b> | 221.6485         | <b>443.2976</b>  | <b>222.1525</b>  | 4  |    |
| 21 | 2188.2462 | 1094.6267       | 2171.2196 | 1086.1134       | 2170.2356      | 1085.6214        | 2205.2727        | <b>1103.1400</b> | A    |           |           | 359.2401  | 180.1237         | 342.2136  | 171.6104        |                |                  | 343.2214        | 172.1143         | 344.2292         | <b>172.6183</b>  | 3  |    |
| 22 | 2301.3302 | 1151.1688       | 2284.3037 | 1142.6555       | 2283.3197      | 1142.1635        | 2318.3568        | <b>1159.6820</b> | L    | 229.1295  |           | 288.2020  | 144.6051         | 271.1765  | 136.9919        |                |                  | <b>272.1843</b> | 136.9598         | 273.1921         | <b>137.0997</b>  | 2  |    |
| 23 |           |                 |           |                 |                |                  |                  |                  | R    | 73.0284   |           | 175.1190  | 88.0631          | 158.0924  | 79.5498         |                |                  | 159.1002        | 80.0538          | 160.1081         | <b>80.5577</b>   | 1  |    |

Monoisotopic mass of neutral peptide Mr(calc): 2474.4346

Fixed modifications: Carbamidomethyl (C) (apply to specified residues or termini only)

Variable modifications:

K1 : Dimethyl\_KR (KR)

Ions Score: 101 Expect: 1.1e-07

Matches : 58/402 fragment ions using 50 most intense peaks ([help](#))

# Mascot Search Results: Peptide View

Kme2SAPATGGVKKPHRYRPGTVALR



MS/MS Fragmentation of **KSAPSTGGVKKPHR**

Found in **sp|P84244|H33\_MOUSE** in **fgcz\_10090**, Histone H3.3 OS=Mus musculus GN=H3f3a

Match to Query 2374: 1504.883016 from(377.228030,4+) intensity(30619.8240) scans(2356) rtinseconds(1425.8218) index(1401)

Title: 1402: Scan 2356 (rt=23.7637) [s:\p749\Proteomics\ORBI\_2\andreamizzi\_20110517\_sperm\_trypsin\_GluC\_ETD\_CID\20110517\_01\_NaCl\_1\_RAW]

Data file 20110517\_01\_NaCl\_1.mgf

Click mouse within plot area to zoom in by factor of two about that point

Or, Plot from  to  Da

Label all possible matches  Label matches used for scoring

Show Y-axis

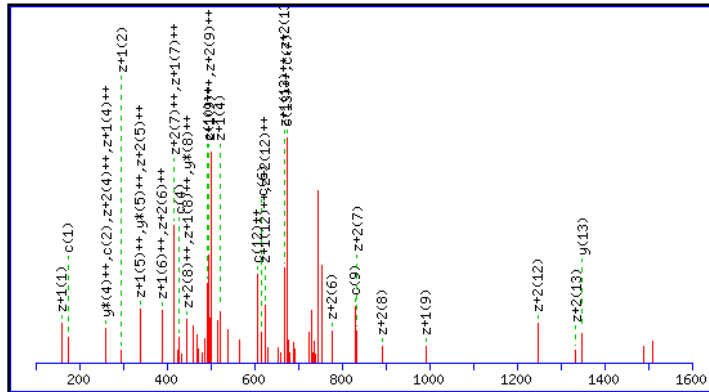

| #  | b         | b <sup>++</sup> | b <sup>*</sup> | b <sup>+++</sup> | b <sup>0</sup> | b <sup>0++</sup> | c         | c <sup>++</sup> | Seq. | w         | w'       | y         | y <sup>++</sup> | y <sup>*</sup> | y <sup>+++</sup> | y <sup>0</sup> | y <sup>0++</sup> | z+1       | z+1 <sup>++</sup> | z+2       | z+2 <sup>++</sup> | #  |    |
|----|-----------|-----------------|----------------|------------------|----------------|------------------|-----------|-----------------|------|-----------|----------|-----------|-----------------|----------------|------------------|----------------|------------------|-----------|-------------------|-----------|-------------------|----|----|
| 1  | 157.1335  | 79.0704         | 140.1070       | 70.5571          |                |                  | 174.1601  | 87.5837         | K    |           |          |           |                 |                |                  |                |                  |           |                   |           |                   |    | 14 |
| 2  | 244.1656  | 122.5864        | 227.1390       | 114.0731         | 226.1550       | 113.5811         | 261.1921  | 131.0997        | S    | 1316.7433 |          | 1349.7648 | 675.3860        | 1332.7383      | 666.8728         | 1331.7542      | 666.3808         | 1333.7461 | 667.3767          | 1334.7539 | 667.8806          | 13 |    |
| 3  | 315.2027  | 158.1050        | 298.1761       | 149.5917         | 297.1921       | 149.0997         | 332.2292  | 166.6183        | A    |           |          | 1262.7328 | 631.8700        | 1245.7062      | 623.3568         | 1244.7222      | 622.8647         | 1246.7141 | 623.8607          | 1247.7219 | 624.3646          | 12 |    |
| 4  | 412.2554  | 206.6314        | 395.2289       | 198.1181         | 394.2449       | 197.6261         | 429.2820  | 215.1446        | P    | 1148.6535 |          | 1191.6957 | 596.3515        | 1174.6691      | 587.8382         | 1173.6851      | 587.3462         | 1175.6769 | 588.3421          | 1176.6848 | 588.8460          | 11 |    |
| 5  | 499.2875  | 250.1474        | 482.2609       | 241.6341         | 481.2769       | 241.1421         | 516.3140  | 258.6606        | S    | 1061.6214 |          | 1094.6429 | 547.8251        | 1077.6164      | 539.3118         | 1076.6323      | 538.8198         | 1078.6242 | 539.8157          | 1079.6320 | 540.3196          | 10 |    |
| 6  | 600.3352  | 300.6712        | 583.3086       | 292.1579         | 582.3246       | 291.6659         | 617.3617  | 309.1845        | T    | 974.5894  | 976.5687 | 1007.6109 | 504.3091        | 990.5843       | 495.7958         | 989.6003       | 495.3038         | 991.5922  | 496.2997          | 992.6000  | 496.8036          | 9  |    |
| 7  | 657.3566  | 329.1819        | 640.3301       | 320.6687         | 639.3461       | 320.1767         | 674.3832  | 337.6952        | G    |           |          | 906.5632  | 453.7852        | 889.5366       | 445.2720         |                |                  | 890.5445  | 445.7759          | 891.5523  | 446.2798          | 8  |    |
| 8  | 714.3781  | 357.6927        | 697.3515       | 349.1794         | 696.3675       | 348.6874         | 731.4046  | 366.2060        | G    |           |          | 849.5417  | 425.2745        | 832.5152       | 416.7612         |                |                  | 833.5230  | 417.2651          | 834.5308  | 417.7691          | 7  |    |
| 9  | 813.4465  | 407.2269        | 796.4199       | 398.7136         | 795.4359       | 398.2216         | 830.4730  | 415.7402        | V    | 761.4781  |          | 792.5203  | 396.7638        | 775.4937       | 388.2505         |                |                  | 776.5015  | 388.7544          | 777.5094  | 389.2583          | 6  |    |
| 10 | 969.5728  | 485.2900        | 952.5462       | 476.7767         | 951.5622       | 476.2847         | 986.5993  | 493.8033        | K    | 591.3362  |          | 693.4519  | 347.2296        | 676.4253       | 338.7163         |                |                  | 677.4331  | 339.2202          | 678.4410  | 339.7241          | 5  |    |
| 11 | 1097.6677 | 549.3375        | 1080.6412      | 540.8242         | 1079.6572      | 540.3322         | 1114.6943 | 557.8508        | K    | 463.2412  |          | 537.3256  | 269.1664        | 520.2990       | 260.6532         |                |                  | 521.3069  | 261.1571          | 522.3147  | 261.6610          | 4  |    |
| 12 | 1194.7205 | 597.8639        | 1177.6939      | 589.3506         | 1176.7099      | 588.8586         | 1211.7470 | 606.3772        | P    | 366.1884  |          | 409.2306  | 205.1190        | 392.2041       | 196.6057         |                |                  | 393.2119  | 197.1096          | 394.2197  | 197.6135          | 3  |    |
| 13 | 1331.7794 | 666.3933        | 1314.7528      | 657.8801         | 1313.7688      | 657.3881         | 1348.8059 | 674.9066        | H    |           |          | 312.1779  | 156.5926        | 295.1513       | 148.0793         |                |                  | 296.1591  | 148.5832          | 297.1670  | 149.0871          | 2  |    |
| 14 |           |                 |                |                  |                |                  |           |                 | R    | 73.0284   |          | 175.1190  | 88.0631         | 158.0924       | 79.5498          |                |                  | 159.1002  | 80.0538           | 160.1081  | 80.5577           | 1  |    |

Monoisotopic mass of neutral peptide Mr(calc): 1504.8838

Fixed modifications: Carbamidomethyl (C) (apply to specified residues or termini only)

Variable modifications:

K1 : Dimethyl\_KR (KR)

K10 : Dimethyl\_KR (KR)

Ions Score: 68 Expect: 0.00018

Matches : 38/226 fragment ions using 31 most intense peaks ([help](#))

# Mascot Search Results: Peptide View

Kme2SAPSTGGVKKme2KPHR

MS/MS Fragmentation of **KSAPSTGGVKKPHRYRPGTVALR**  
 Found in **sp|P84244|H33\_MOUSE** in **fgcz\_10090**, Histone H3.3 OS=Mus musculus GN=H3f3a

Match to Query 3183: 2476.412970 from(496.289870,5+) intensity(421526.5000) scans(2942) rtinseconds(1837.045) index(1627)  
 Title: 1628: Scan 2942 (rt=30.6174) [s:\p749\Proteomics\ORBI\_2\andreamizzi\_20110310\_sperm\_trypsin\_chymo\_AspN\_ETD\_CID\20110310\_11\_NaCl\_trypsin.RAW]  
 Data file \fgcz-ms.uzh.ch\p749\Proteomics\ORBI\_2\andreamizzi\_20110310\_sperm\_trypsin\_chymo\_AspN\_ETD\_CID\mgf\_low\_res\_MS2\_nomerge\20110310\_11\_NaCl\_trypsin.mgf

Click mouse within plot area to zoom in by factor of two about that point  
 Or, Plot from  to  Da   
 Label all possible matches  Label matches used for scoring   
 Show Y-axis

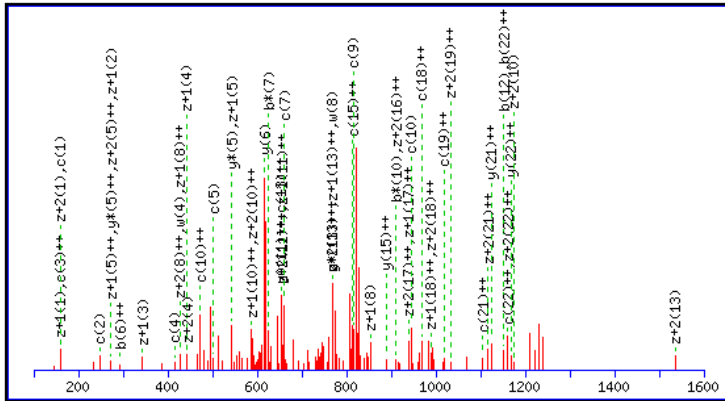

**Monoisotopic mass of neutral peptide Mr(calc):** 2476.4139  
**Fixed modifications:** Carbamidomethyl (C) (apply to specified residues or termini only)  
**Variable modifications:**  
 K1 : Methyl\_KR (KR)  
**Ions Score:** 46 **Expect:** 0.018  
**Matches :** 58/403 fragment ions using 81 most intense peaks ([help](#))

| #  | b         | b <sup>++</sup> | b <sup>+</sup> | b <sup>+++</sup> | b <sup>0</sup> | b <sup>***</sup> | c         | c <sup>++</sup> | Seq. | w         | w'        | y         | y <sup>++</sup> | y <sup>+</sup> | y <sup>+++</sup> | y <sup>0</sup> | y <sup>0++</sup> | z+1       | z+1 <sup>++</sup> | z+2       | z+2 <sup>++</sup> | #        |    |
|----|-----------|-----------------|----------------|------------------|----------------|------------------|-----------|-----------------|------|-----------|-----------|-----------|-----------------|----------------|------------------|----------------|------------------|-----------|-------------------|-----------|-------------------|----------|----|
| 1  | 143.1179  | 72.0626         | 126.0913       | 63.5493          |                |                  | 160.1444  | 80.5759         | K    |           |           |           |                 |                |                  |                |                  |           |                   |           |                   |          | 23 |
| 2  | 230.1499  | 115.5786        | 213.1234       | 107.0653         | 212.1394       | 106.5733         | 247.1765  | 124.0919        | S    | 2302.2891 |           | 2335.3106 | 1168.1589       | 2318.2840      | 1159.6456        | 2317.3000      | 1159.1536        | 2319.2918 | 1160.1496         | 2320.2997 | 1160.6535         | 232      |    |
| 3  | 301.1870  | 151.0972        | 284.1605       | 142.5839         | 283.1765       | 142.0919         | 318.2136  | 159.6104        | A    |           |           | 2248.2785 | 1124.6429       | 2231.2520      | 1116.1296        | 2230.2680      | 1115.6376        | 2232.2598 | 1116.6335         | 2233.2676 | 1117.1375         | 21       |    |
| 4  | 398.2398  | 199.6235        | 381.2132       | 191.1103         | 380.2292       | 190.6183         | 415.2663  | 208.1368        | P    | 2134.1992 |           | 2177.2414 | 1089.1243       | 2160.2149      | 1080.6111        | 2159.2309      | 1080.1191        | 2161.2227 | 1081.1150         | 2162.2305 | 1081.6189         | 20       |    |
| 5  | 485.2718  | 243.1395        | 468.2453       | 234.6263         | 467.2613       | 234.1343         | 502.2984  | 251.6528        | S    | 2047.1672 |           | 2080.1887 | 1040.9980       | 2063.1621      | 1032.0847        | 2062.1781      | 1031.5927        | 2064.1699 | 1032.5886         | 2065.1778 | 1033.0925         | 19       |    |
| 6  | 586.3195  | 293.6534        | 569.2390       | 285.1501         | 568.3089       | 284.6581         | 603.3461  | 302.1767        | T    | 1960.1352 | 1962.1144 | 1993.1566 | 997.0820        | 1976.1301      | 988.5687         | 1975.1461      | 988.0767         | 1977.1379 | 989.0726          | 1978.1457 | 989.5765          | 18       |    |
| 7  | 643.3410  | 322.1741        | 626.3144       | 313.6608         | 625.3304       | 313.1688         | 660.3675  | 330.6874        | G    |           |           | 1892.1089 | 946.5581        | 1875.0824      | 938.0448         | 1874.0984      | 937.5528         | 1876.0902 | 938.5487          | 1877.0980 | 939.0527          | 17       |    |
| 8  | 700.3624  | 350.6849        | 683.3359       | 342.1716         | 682.3519       | 341.6796         | 717.3890  | 359.1981        | G    |           |           | 1835.0875 | 918.0474        | 1818.0609      | 905.5341         | 1817.0769      | 909.0421         | 1819.0688 | 910.0380          | 1820.0766 | 910.5419          | 16       |    |
| 9  | 799.4308  | 400.2191        | 782.4043       | 391.7058         | 781.4203       | 391.2138         | 816.4574  | 408.7323        | V    | 1747.0238 |           | 1778.0660 | 889.5356        | 1761.0395      | 881.0234         | 1760.0555      | 880.5314         | 1762.0473 | 881.5273          | 1763.0551 | 882.0312          | 15       |    |
| 10 | 927.5258  | 464.2665        | 910.4993       | 455.7533         | 909.5152       | 455.2613         | 944.5524  | 472.7798        | K    | 1604.9132 |           | 1678.9976 | 840.0024        | 1661.9711      | 831.4892         | 1660.9870      | 830.9972         | 1662.9789 | 831.9931          | 1663.9867 | 832.4970          | 14       |    |
| 11 | 1055.6208 | 528.3140        | 1038.5942      | 519.8007         | 1037.6102      | 519.3087         | 1072.6473 | 536.8273        | K    | 1476.8182 |           | 1550.9026 | 775.9550        | 1533.8761      | 767.4417         | 1532.8921      | 766.9497         | 1534.8839 | 767.9456          | 1535.8917 | 768.4495          | 13       |    |
| 12 | 1152.6735 | 576.8404        | 1135.6470      | 568.3271         | 1134.6630      | 567.8351         | 1169.7001 | 585.3537        | P    | 1379.7655 |           | 1422.8077 | 711.9075        | 1405.7811      | 703.3942         | 1404.7971      | 702.9022         | 1406.7890 | 703.8981          | 1407.7968 | 704.4020          | 12       |    |
| 13 | 1289.7324 | 645.3699        | 1272.7059      | 636.8566         | 1271.7219      | 636.3646         | 1306.7590 | 653.8831        | H    |           |           | 1325.7549 | 663.8111        | 1308.7284      | 654.8678         | 1307.7443      | 654.3738         | 1309.7362 | 655.3717          | 1310.7440 | 655.8756          | 11       |    |
| 14 | 1445.8336 | 723.4204        | 1428.8070      | 714.9071         | 1427.8230      | 714.4151         | 1462.8601 | 731.9337        | R    | 1086.6055 |           | 1188.6960 | 594.8516        | 1171.6695      | 585.3384         | 1170.6854      | 585.8464         | 1172.6773 | 586.8423          | 1173.6851 | 587.3462          | 10       |    |
| 15 | 1608.8969 | 804.9521        | 1591.8703      | 796.4388         | 1590.8863      | 795.9468         | 1625.9234 | 813.4654        | A    |           |           | 1032.5949 | 516.8011        | 1015.5683      | 508.2878         | 1014.5843      | 507.9958         | 1016.5762 | 508.7917          | 1017.5849 | 509.2956          | 9        |    |
| 16 | 1764.9980 | 883.0026        | 1747.9714      | 874.4894         | 1746.9874      | 873.9974         | 1782.0245 | 891.5159        | R    | 767.4410  |           | 869.5316  | 435.2694        | 852.5050       | 426.7561         | 851.5210       | 426.2641         | 853.5128  | 427.2601          | 854.5207  | 427.7640          | 8        |    |
| 17 | 1862.0508 | 931.5290        | 1845.0422      | 923.0157         | 1844.0402      | 922.5237         | 1879.0773 | 940.0423        | P    | 670.3883  |           | 713.4305  | 357.2189        | 696.4039       | 348.7056         | 695.4199       | 348.2136         | 697.4117  | 349.2095          | 698.4196  | 349.7134          | 7        |    |
| 18 | 1919.0722 | 960.0938        | 1902.0457      | 951.5265         | 1901.0617      | 951.0345         | 1936.0988 | 968.5330        | G    |           |           | 616.3777  | 308.6925        | 595.3511       | 300.1792         | 598.3671       | 299.6872         | 600.3590  | 300.6861          | 601.3668  | 301.8870          | 6        |    |
| 19 | 2020.1199 | 1015.5636       | 2003.0934      | 1002.0503        | 2002.1093      | 1001.5583        | 2037.1465 | 1019.0769       | T    | 526.3348  | 528.3140  | 559.3562  | 280.1871        | 542.3297       | 271.6465         | 541.3457       | 271.1765         | 543.3375  | 272.1724          | 544.3453  | 273.6763          | 5        |    |
| 20 | 2119.1883 | 1060.0978       | 2102.1618      | 1051.5845        | 2101.1778      | 1051.0925        | 2136.2149 | 1068.6111       | V    | 427.2663  |           | 458.3085  | 229.6579        | 441.2820       | 221.1446         | 442.2898       | 221.6485         | 443.2976  | 222.1525          | 444.2976  | 222.525           | 4        |    |
| 21 | 2190.2254 | 1095.6164       | 2173.1989      | 1087.1031        | 2172.2149      | 1086.6111        | 2207.2520 | 1104.1296       | A    |           |           | 359.2401  | 180.1237        | 342.2136       | 171.6104         | 343.2214       | 172.1143         | 344.2292  | 173.6183          | 345.2371  | 174.6383          | 3        |    |
| 22 | 2303.3095 | 1152.1584       | 2286.2829      | 1143.6451        | 2285.2989      | 1143.1531        | 2320.3360 | 1160.6717       | L    | 229.1295  |           | 288.2030  | 144.6051        | 271.1765       | 136.0919         | 272.1843       | 136.5958         | 273.1921  | 137.0997          | 274.1976  | 138.1067          | 2        |    |
| 23 |           |                 |                |                  |                |                  |           |                 | R    | 73.0284   |           | 175.1190  | 88.0631         | 158.0924       | 79.5498          | 159.1002       | 80.0538          | 160.1081  | 80.5577           | 161.1156  | 81.0657           | 162.1731 | 1  |

## Mascot Search Results: Peptide View

Kme1SAPSTGGVKKPHRYRPGTVALR

MS/MS Fragmentation of **KSAPSTGGVKKPHRYRPGTVALR**

Found in **sp|P84244|H33\_MOUSE** in **fgcz\_10090**, Histone H3.3 OS=Mus musculus GN=H3f3a

Match to Query 5468: 2518.456720 from(504.698620,5+) intensity(182475.4700) scans(2290) rtinseconds(1874.7487) index(3765)

Title: 739: Scan 2290 (rt=31.2458) [s:\p749\Proteomics\ORBI\_2\andreamizzi\_20110310\_sperm\_trypsin\_chymo\_AspN\_ETD\_CID\20110311\_34\_NaCl\_trypsin\_SCX\_FT.RAW]

Data file Y:\p749\Proteomics\Mascot\mgf\50\_20110426\_sperm\_rerun\_trypsin\_2nd\_ETD\_run\_NaCl\_SCX\mascot\_daemon\_merge.mgf

Click mouse within plot area to zoom in by factor of two about that point

Or,  100 to  Da

Label all possible matches  Label matches used for scoring

Show Y-axis

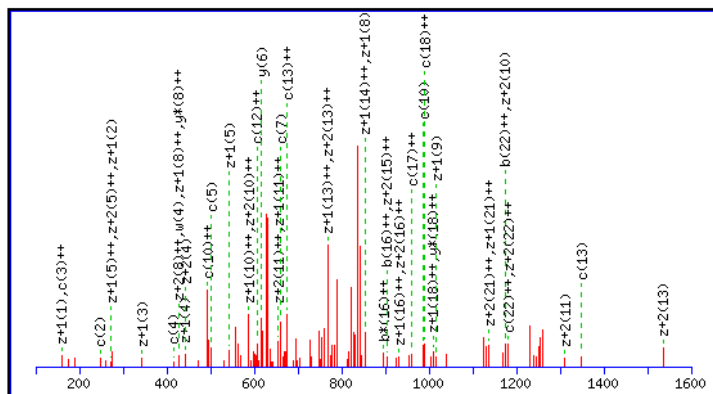

| #  | b         | b <sup>++</sup>  | b <sup>*</sup> | b <sup>++</sup> | b <sup>0</sup> | b <sup>0++</sup> | c                | c <sup>++</sup>  | Seq. | w               | w'        | y               | y <sup>-</sup> | y <sup>+</sup> | y <sup>++</sup>  | y <sup>0</sup> | y <sup>0++</sup> | z+1              | z+1 <sup>++</sup> | z+2              | z+2 <sup>++</sup> | #  |
|----|-----------|------------------|----------------|-----------------|----------------|------------------|------------------|------------------|------|-----------------|-----------|-----------------|----------------|----------------|------------------|----------------|------------------|------------------|-------------------|------------------|-------------------|----|
| 1  | 143.1179  | 72.0626          | 126.0913       | 63.5493         |                |                  | 160.1444         | 80.5759          | K    |                 |           |                 |                |                |                  |                |                  |                  |                   |                  |                   | 23 |
| 2  | 230.1499  | 115.5786         | 213.1234       | 107.0653        | 212.1394       | 106.5733         | <b>247.1765</b>  | 124.0919         | S    | 2344.3360       |           | 2377.3575       | 1189.1824      | 2360.3310      | 1180.6691        | 2359.3469      | 1180.1771        | 2361.3388        | 1181.1730         | 2362.3466        | <b>1181.6769</b>  | 22 |
| 3  | 301.1870  | 151.0972         | 284.1605       | 142.5839        | 283.1765       | 142.0919         | 318.2136         | <b>159.6104</b>  | A    |                 |           | 2290.3255       | 1145.6664      | 2273.2989      | 1137.1531        | 2272.3149      | 1136.6611        | 2274.3068        | <b>1137.6570</b>  | 2275.3146        | <b>1136.1609</b>  | 21 |
| 4  | 398.2398  | 199.6235         | 381.2132       | 191.1103        | 380.2292       | 190.6183         | <b>415.2663</b>  | 208.1368         | P    | 2176.2462       |           | 2219.2884       | 1110.1478      | 2202.2618      | 1101.6345        | 2201.2778      | 1101.1425        | 2203.2696        | 1102.1385         | 2204.2775        | 1102.6424         | 20 |
| 5  | 485.2718  | 243.1395         | 468.2453       | 234.6263        | 467.2613       | 234.1343         | <b>502.2984</b>  | 251.6538         | S    | 2089.2141       |           | 2122.2356       | 1061.6214      | 2105.2091      | 1053.1082        | 2104.2250      | 1052.6162        | 2106.2169        | 1055.6121         | 2107.2247        | 1054.1160         | 19 |
| 6  | 586.3195  | 293.6634         | 569.2910       | 285.1501        | 568.3089       | 284.6581         | 603.3461         | 302.1767         | T    | 2002.1821       | 2004.1614 | 2035.2036       | 1018.1054      | 2018.1770      | <b>1009.5922</b> | 2017.1930      | 1009.1001        | 2019.1849        | <b>1010.0961</b>  | 2020.1927        | 1010.6000         | 18 |
| 7  | 643.3410  | 322.1741         | 626.3144       | 313.6608        | 625.3304       | 313.1688         | <b>660.3675</b>  | 330.6874         | G    |                 |           | 1934.1559       | 967.5816       | 1917.1293      | 959.0663         | 1916.1453      | 958.5763         | 1918.1372        | 959.5722          | 1919.1450        | 960.0761          | 17 |
| 8  | 700.3624  | 350.6849         | 683.3539       | 342.1716        | 682.3519       | 341.6796         | 717.3890         | 359.1981         | G    |                 |           | 1877.1344       | 939.0709       | 1860.1079      | 930.5576         | 1859.1239      | 930.0656         | 1861.1157        | <b>931.0615</b>   | 1862.1235        | <b>931.5634</b>   | 16 |
| 9  | 799.4308  | 400.2191         | 782.4043       | 391.7058        | 781.4203       | 391.2138         | 816.4574         | 408.7323         | V    | 1789.0708       |           | 1820.1130       | 910.5601       | 1803.0864      | 902.0468         | 1802.1024      | 901.5548         | 1804.0942        | 902.5508          | 1805.1021        | <b>903.0547</b>   | 15 |
| 10 | 969.5728  | 485.2900         | 952.5642       | 476.7767        | 951.5622       | 476.2847         | <b>986.5993</b>  | <b>493.8033</b>  | K    | 1604.9132       |           | 1721.0446       | 861.0259       | 1704.0180      | 852.5126         | 1703.0340      | 852.0206         | 1705.0258        | <b>853.0166</b>   | 1706.0337        | <b>853.5205</b>   | 14 |
| 11 | 1097.6677 | 549.3375         | 1080.6412      | 540.6242        | 1079.6572      | 540.3322         | 1114.6943        | 557.8508         | K    | 1476.8182       |           | 1550.9026       | 775.9550       | 1533.8761      | 767.4417         | 1532.8921      | 766.9497         | 1534.8839        | <b>767.9456</b>   | <b>1535.8917</b> | <b>768.4495</b>   | 13 |
| 12 | 1194.7205 | 597.8639         | 1177.6939      | 589.3506        | 1176.7099      | 588.8586         | 1211.7470        | <b>606.3772</b>  | P    | 1379.7655       |           | 1422.8077       | 711.9075       | 1405.7811      | 703.3942         | 1404.7971      | 702.9022         | 1406.7890        | 703.8981          | 1407.7968        | 704.4020          | 12 |
| 13 | 1331.7794 | 666.3933         | 1314.7528      | 657.8801        | 1313.7688      | 657.3881         | <b>1348.8059</b> | <b>674.9066</b>  | H    |                 |           | 1325.7549       | 663.3811       | 1308.7284      | 654.8678         | 1307.7443      | 654.3758         | 1309.7362        | <b>655.3717</b>   | <b>1310.7440</b> | <b>655.8756</b>   | 11 |
| 14 | 1487.8805 | 744.4439         | 1470.8540      | 735.9306        | 1469.8699      | 735.4386         | 1504.9071        | 752.9572         | R    | 1086.6055       |           | 1188.6960       | 594.8516       | 1171.6695      | 586.3384         | 1170.6854      | 585.8464         | 1172.6773        | <b>586.8423</b>   | <b>1173.6851</b> | <b>587.3462</b>   | 10 |
| 15 | 1650.9438 | 825.9756         | 1633.9173      | 817.4623        | 1632.9333      | 816.9703         | 1667.9704        | 834.4888         | Y    |                 |           | 1032.5949       | 516.8011       | 1015.5683      | 508.2878         | 1014.5843      | 507.7958         | <b>1016.5762</b> | 508.7917          | 1017.5840        | 509.2956          | 9  |
| 16 | 1807.0449 | <b>904.0261</b>  | 1790.0184      | <b>895.5128</b> | 1789.0344      | 895.0208         | 1824.0715        | 912.5394         | R    | 767.4410        |           | 869.5316        | 435.2694       | 852.5050       | <b>426.7561</b>  | 851.5210       | 426.2641         | <b>853.5128</b>  | <b>427.2601</b>   | 854.5207         | <b>427.7640</b>   | 8  |
| 17 | 1904.0977 | 952.5525         | 1887.0712      | 944.0392        | 1886.0871      | 943.5472         | 1921.1243        | <b>961.0658</b>  | P    | 670.3883        |           | 713.4305        | 357.2189       | 696.4039       | 348.7056         | 695.4199       | 348.2136         | 697.4117         | 349.2095          | 698.4196         | 349.7134          | 7  |
| 18 | 1961.1192 | 981.0632         | 1944.0926      | 972.5500        | 1943.1086      | 972.0579         | 1978.1457        | <b>989.5765</b>  | G    |                 |           | <b>616.3777</b> | 308.6925       | 599.3310       | 300.1792         | 598.3671       | 299.6872         | 600.3590         | 300.6831          | 301.3668         | 301.1870          | 6  |
| 19 | 2062.1669 | 1031.5871        | 2045.1403      | 1023.0738       | 2044.1563      | 1022.5818        | 2079.1934        | 1040.1003        | T    | 526.3348        | 528.3140  | 559.3562        | 280.1817       | 542.3297       | 271.6685         | 541.3457       | 271.1765         | <b>543.3375</b>  | <b>272.1724</b>   | 544.3453         | <b>272.6763</b>   | 5  |
| 20 | 2161.2353 | 1081.1213        | 2144.2087      | 1072.6080       | 2143.2247      | 1072.1160        | 2179.1618        | 1089.6345        | V    | <b>427.2063</b> |           | 458.3085        | 229.6579       | 441.2820       | 221.1446         |                |                  | <b>442.2898</b>  | 221.6485          | <b>443.2976</b>  | 222.1525          | 4  |
| 21 | 2232.2724 | 1116.6398        | 2215.2458      | 1108.1266       | 2214.2618      | 1107.6345        | 2249.2989        | 1125.1531        | A    |                 |           | 359.2401        | 180.1237       | 342.2136       | 171.6104         |                |                  | <b>343.2214</b>  | 172.1143          | <b>344.2292</b>  | 172.6183          | 3  |
| 22 | 2345.3564 | <b>1173.1819</b> | 2328.3299      | 1164.6686       | 2327.3459      | 1164.1766        | 2362.3830        | <b>1181.6951</b> | L    | 229.1295        |           | 288.2030        | 144.6051       | 271.1765       | 136.0919         |                |                  | <b>272.1843</b>  | 136.5958          | 273.1921         | 137.0997          | 2  |
| 23 |           |                  |                |                 |                |                  |                  |                  | R    | 73.0284         |           | 175.1190        | 88.0631        | 158.0924       | 79.5498          |                |                  | <b>159.1002</b>  | 80.0538           | 160.1081         | 80.5577           | 1  |

Monoisotopic mass of neutral peptide Mr(calc): 2518.4608

Fixed modifications: Carbamidomethyl (C) (apply to specified residues or termini only)

Variable modifications:

K1 : Methyl\_KR (KR)

K10 : Trimethyl (K)

Ions Score: 46 Expect: 0.014

Matches : 50/403 fragment ions using 67 most intense peaks ([help](#))

# Mascot Search Results: Peptide View

Kme1SAPSTGGVkmE3KPHRYRPGTVALR

MS/MS Fragmentation of **KSAPSTGGVKKPHRYRPGTVALR**  
 Found in **sp|P84244|H33\_MOUSE** in **fgcz\_10090**, Histone H3.3 OS=Mus musculus GN=H3f3a

Match to Query 3918: 2504.439020 from(501.895080,5+) intensity(434500.2200) scans(3361) rtinseconds(1964.7743) index(2090)  
 Title: 2091: Scan 3361 (rt=32.7462) [s:p749\Proteomics\ORBI\_2\andreamizzi\_20110517\_sperm\_trypsin\_GluC\_ETD\_CID\20110517\_01\_NaCl\_1\_RAW]  
 Data file 20110517\_01\_NaCl\_1.mgf

Click mouse within plot area to zoom in by factor of two about that point  
 Or,  to  Da   
 Label all possible matches  Label matches used for scoring   
 Show Y-axis

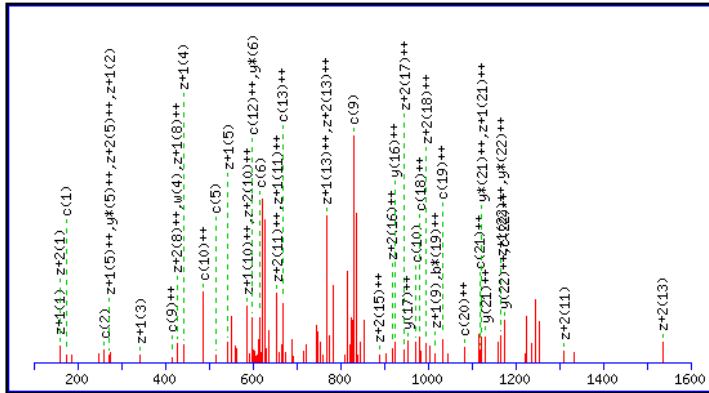

| #  | b         | b <sup>++</sup> | b <sup>*</sup> | b <sup>+++</sup> | b <sup>0</sup> | b <sup>0++</sup> | c         | c <sup>++</sup> | Seq. | w         | w'        | y         | y <sup>++</sup> | y <sup>*</sup> | y <sup>+++</sup> | y <sup>0</sup> | y <sup>0++</sup> | z+1       | z+1 <sup>++</sup> | z+2       | z+2 <sup>++</sup> | # |    |
|----|-----------|-----------------|----------------|------------------|----------------|------------------|-----------|-----------------|------|-----------|-----------|-----------|-----------------|----------------|------------------|----------------|------------------|-----------|-------------------|-----------|-------------------|---|----|
| 1  | 157.1335  | 79.0704         | 140.1070       | 70.5571          |                |                  | 174.1601  | 87.5837         | K    |           |           |           |                 |                |                  |                |                  |           |                   |           |                   |   | 23 |
| 2  | 244.1656  | 122.5864        | 227.1390       | 114.0731         | 226.1550       | 113.5811         | 261.1921  | 131.0997        | S    | 2316.3047 |           | 2349.3262 | 1175.1667       | 2332.2997      | 1166.6533        | 2331.3156      | 1166.1615        | 2333.3075 | 1167.1574         | 2334.3153 | 1167.6613         |   | 22 |
| 3  | 315.2027  | 158.1050        | 298.1761       | 149.5917         | 297.1921       | 149.0997         | 332.2392  | 166.6183        | A    |           |           | 2262.2942 | 1131.6507       | 2245.2676      | 1123.1375        | 2244.2836      | 1122.6454        | 2246.2755 | 1123.6414         | 2247.2833 | 1124.1453         |   | 21 |
| 4  | 412.2554  | 206.6314        | 395.2289       | 198.1181         | 394.2449       | 197.6261         | 429.2820  | 215.1446        | P    | 2148.2149 |           | 2191.2571 | 1096.1322       | 2174.2305      | 1087.6189        | 2173.2465      | 1087.1789        | 2175.2383 | 1088.1728         | 2176.2462 | 1088.6267         |   | 20 |
| 5  | 499.2875  | 250.1474        | 482.2609       | 241.6341         | 481.2769       | 241.1421         | 516.3140  | 258.6606        | S    | 2061.1828 |           | 2094.2043 | 1047.6058       | 2077.1778      | 1039.0925        | 2076.1937      | 1038.6005        | 2078.1856 | 1039.5964         | 2079.1934 | 1040.1003         |   | 19 |
| 6  | 600.3352  | 300.6712        | 583.3086       | 292.1579         | 582.3246       | 291.6659         | 617.3617  | 309.1845        | T    | 1974.1508 | 1976.1301 | 2007.1723 | 1004.0898       | 1990.1457      | 995.5765         | 1989.1617      | 995.0845         | 1991.1536 | 996.0804          | 1992.1614 | 996.5843          |   | 18 |
| 7  | 657.3566  | 329.1819        | 640.3301       | 320.6687         | 639.3461       | 320.1767         | 674.3832  | 337.6952        | G    |           |           | 1906.1246 | 953.5659        | 1889.0980      | 945.0527         | 1888.1140      | 944.5607         | 1890.1059 | 945.5566          | 1891.1137 | 946.0605          |   | 17 |
| 8  | 714.3781  | 357.6927        | 697.3515       | 349.1794         | 696.3675       | 348.6874         | 731.4046  | 366.2060        | G    |           |           | 1849.1031 | 925.0552        | 1832.0766      | 916.5419         | 1831.0926      | 916.0499         | 1833.0844 | 917.0458          | 1834.0922 | 917.5496          |   | 16 |
| 9  | 813.4465  | 407.2269        | 796.4199       | 398.7136         | 795.4359       | 398.2216         | 830.4730  | 415.7402        | V    | 1761.0395 |           | 1792.0817 | 896.5445        | 1775.0551      | 888.0312         | 1774.0711      | 887.5392         | 1776.0629 | 888.5351          | 1777.0708 | 889.0390          |   | 15 |
| 10 | 955.5571  | 478.2822        | 938.5306       | 469.7689         | 937.5465       | 469.2769         | 972.5837  | 486.7955        | K    | 1604.9132 |           | 1693.0133 | 847.0103        | 1765.9867      | 838.4970         | 1675.0027      | 838.0030         | 1676.9945 | 839.0009          | 1678.0024 | 839.5048          |   | 14 |
| 11 | 1083.6521 | 542.3297        | 1066.6255      | 533.8164         | 1065.6415      | 533.3244         | 1100.6786 | 550.8429        | K    | 1476.8182 |           | 1550.9026 | 775.9550        | 1533.8761      | 767.4417         | 1532.8921      | 766.9497         | 1534.8839 | 767.9456          | 1535.8917 | 768.4495          |   | 13 |
| 12 | 1180.7048 | 590.8561        | 1163.6783      | 582.3428         | 1162.6943      | 581.8508         | 1197.7314 | 599.3693        | P    | 1379.7655 |           | 1422.8077 | 711.9075        | 1405.7811      | 703.3942         | 1404.7971      | 702.9022         | 1406.7890 | 703.8981          | 1407.7968 | 704.4020          |   | 12 |
| 13 | 1317.7637 | 659.8855        | 1300.7372      | 650.8722         | 1299.7532      | 650.3802         | 1334.7903 | 667.8988        | H    |           |           | 1325.7549 | 663.3811        | 1308.7284      | 654.8678         | 1307.7443      | 654.3758         | 1309.7362 | 655.3717          | 1310.7440 | 655.8756          |   | 11 |
| 14 | 1473.8649 | 737.4361        | 1456.8383      | 728.9228         | 1455.8543      | 728.4308         | 1490.8914 | 745.9493        | R    | 1086.6055 |           | 1188.6960 | 594.8516        | 1171.6695      | 586.3384         | 1170.6854      | 585.8464         | 1172.6773 | 586.8423          | 1173.6851 | 587.3462          |   | 10 |
| 15 | 1636.9282 | 818.9677        | 1619.9016      | 810.4545         | 1618.9176      | 809.9624         | 1653.9547 | 827.4810        | Y    |           |           | 1032.5949 | 516.8011        | 1015.5683      | 508.2878         | 1014.5843      | 507.7958         | 1016.5772 | 508.7917          | 1017.5840 | 509.2956          |   | 9  |
| 16 | 1793.0293 | 897.0183        | 1776.0027      | 888.5050         | 1775.0187      | 888.0130         | 1810.0508 | 905.5316        | R    | 767.4410  |           | 869.5316  | 435.2694        | 852.5050       | 426.7561         | 851.5210       | 426.2641         | 853.5128  | 427.2601          | 854.2077  | 427.7640          |   | 8  |
| 17 | 1890.0821 | 945.5447        | 1873.0555      | 937.0314         | 1872.0715      | 936.5394         | 1907.1086 | 954.0579        | P    | 670.3883  |           | 713.4305  | 357.2189        | 696.4039       | 348.7056         | 695.4199       | 348.2136         | 697.4117  | 349.2095          | 698.4196  | 349.7134          |   | 7  |
| 18 | 1947.1035 | 974.0554        | 1930.0770      | 965.5421         | 1929.0930      | 965.0501         | 1964.1301 | 982.5687        | G    |           |           | 616.3777  | 308.6925        | 599.3511       | 300.1792         | 598.3671       | 299.6872         | 600.3390  | 300.6831          | 601.3668  | 301.1870          |   | 6  |
| 19 | 2048.1512 | 1024.5792       | 2031.1247      | 1016.0660        | 2030.1406      | 1015.5740        | 2065.1778 | 1033.0925       | T    | 526.3348  | 528.3140  | 559.3562  | 280.1817        | 542.3297       | 271.6660         | 541.3457       | 271.1765         | 543.3375  | 272.7274          | 544.3453  | 273.6763          |   | 5  |
| 20 | 2147.2196 | 1074.1134       | 2130.1931      | 1065.6002        | 2129.2091      | 1065.1082        | 2164.2462 | 1082.6267       | V    | 427.2663  |           | 458.3085  | 229.6579        | 441.2820       | 221.1446         |                |                  | 442.2898  | 221.6485          | 443.2976  | 222.1525          |   | 4  |
| 21 | 2218.2567 | 1109.6320       | 2201.2302      | 1101.1187        | 2200.2462      | 1100.6267        | 2235.2833 | 1118.1453       | A    |           |           | 359.2401  | 180.1237        | 342.2136       | 171.6104         |                |                  | 343.2214  | 172.1143          | 344.2292  | 172.6183          |   | 3  |
| 22 | 2331.3408 | 1166.1740       | 2314.3142      | 1157.6608        | 2313.3302      | 1157.1688        | 2348.3673 | 1174.6873       | L    | 229.1295  |           | 288.2030  | 144.6051        | 271.1765       | 136.0919         |                |                  | 272.1843  | 136.5958          | 273.1921  | 137.0997          |   | 2  |
| 23 |           |                 |                |                  |                |                  |           |                 | R    | 73.0284   |           | 175.1190  | 88.0631         | 158.0924       | 79.5498          |                |                  | 159.1002  | 80.0338           | 160.1081  | 80.5577           |   | 1  |

**Monoisotopic mass of neutral peptide Mr(calc):** 2504.4452  
**Fixed modifications:** Carbamidomethyl (C) (apply to specified residues or termini only)  
**Variable modifications:**  
**K1** : Dimethyl\_KR (KR)  
**K10** : Methyl\_KR (KR)  
**Ions Score:** 53 **Expect:** 0.0015  
**Matches:** 50/403 fragment ions using 67 most intense peaks ([help](#))

## Mascot Search Results: Peptide View

Kme2SAPSTGGVkmE1KPHRYRPGTVALR

MS/MS Fragmentation of **KSAPSTGGVKKPHRYRPGTVALR**

Found in **sp|P84244|H33\_MOUSE** in **fgcz\_10090**, Histone H3.3 OS=Mus musculus GN=H3f3a

Match to Query 3695: 2518.459470 from(504.699170,5+) intensity(204046.8900) scans(3054) rtinseconds(1973.2304) index(1851)

Title: 1852: Scan 3054 (rt=32.8872) [s\p749\Proteomics\ORBI\_2\andreamizzi\_20110517\_sperm\_trypsin\_GluC\_ETD\_CID\20110519\_01\_NaCl\_ziptipped\_1.RAW]

Data file 20110519\_01\_NaCl\_ziptipped\_1.mgf

Click mouse within plot area to zoom in by factor of two about that point

Or, **Plot from**  to  Da **Full range**

Label all possible matches  Label matches used for scoring

Show Y-axis

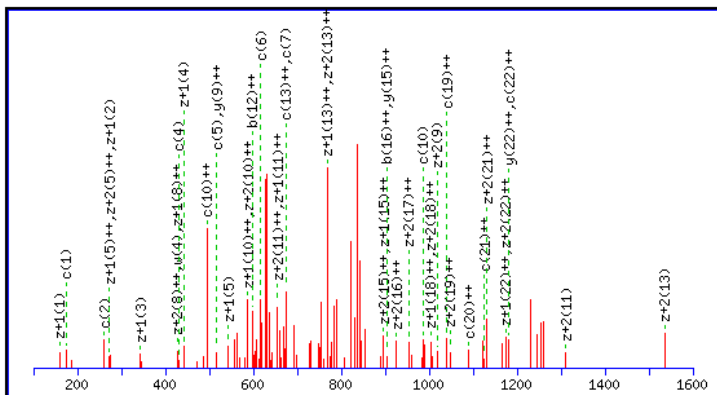

| #  | b         | b <sup>++</sup> | b <sup>*</sup> | b <sup>++</sup> | b <sup>0</sup> | b <sup>0++</sup> | c         | c <sup>++</sup> | Seq. | w         | w'        | y         | y <sup>++</sup> | y <sup>*</sup> | y <sup>++</sup> | y <sup>0</sup> | y <sup>0++</sup> | z+1       | z+1 <sup>++</sup> | z+2       | z+2 <sup>++</sup> | #  |    |
|----|-----------|-----------------|----------------|-----------------|----------------|------------------|-----------|-----------------|------|-----------|-----------|-----------|-----------------|----------------|-----------------|----------------|------------------|-----------|-------------------|-----------|-------------------|----|----|
| 1  | 157.1335  | 79.0704         | 140.1070       | 70.5571         |                |                  | 174.1601  | 87.5837         | K    |           |           |           |                 |                |                 |                |                  |           |                   |           |                   |    | 23 |
| 2  | 244.1656  | 122.5864        | 227.1390       | 114.0731        | 226.1550       | 113.5911         | 261.1921  | 131.0997        | S    | 2330.3204 |           | 2363.3419 | 1182.1746       | 2346.3153      | 1173.6613       | 2345.3313      | 1173.1693        | 2347.3231 | 1174.1652         | 2348.3310 | 1174.6691         | 22 |    |
| 3  | 315.2027  | 158.1050        | 298.1761       | 149.5917        | 297.1921       | 149.0997         | 332.2292  | 166.6183        | A    |           |           | 2276.3098 | 1138.6586       | 2259.2831      | 1130.1453       | 2258.2993      | 1120.6533        | 2260.2911 | 1130.6492         | 2261.2989 | 1131.1531         | 21 |    |
| 4  | 412.2554  | 206.6314        | 395.2289       | 198.1181        | 394.2449       | 197.6261         | 429.2820  | 215.1446        | P    | 2162.2305 |           | 2205.2727 | 1103.1400       | 2188.2462      | 1094.6267       | 2187.2622      | 1094.1347        | 2189.2540 | 1095.1306         | 2190.2618 | 1095.6345         | 20 |    |
| 5  | 499.2875  | 250.1474        | 482.2609       | 241.6341        | 481.2769       | 241.1421         | 516.3140  | 258.6606        | S    | 2075.1985 |           | 2108.2200 | 1054.6136       | 2091.1934      | 1046.1003       | 2090.2094      | 1045.6083        | 2092.2012 | 1046.6043         | 2093.2091 | 1047.1082         | 19 |    |
| 6  | 600.3352  | 300.6712        | 583.3086       | 292.1579        | 582.3246       | 291.6659         | 617.3617  | 309.1845        | T    | 1988.1665 | 1990.1457 | 2021.1879 | 1011.0976       | 2004.1614      | 1002.5843       | 2003.1774      | 1002.0923        | 2005.1692 | 1003.0882         | 2006.1770 | 1003.5922         | 18 |    |
| 7  | 657.3566  | 329.1819        | 640.3301       | 320.6687        | 639.3461       | 320.1767         | 674.3832  | 337.6952        | G    |           |           | 1920.1402 | 960.5738        | 1903.1137      | 952.0605        | 1902.1297      | 951.5685         | 1904.1215 | 952.5644          | 1905.1293 | 953.0683          | 17 |    |
| 8  | 714.3781  | 357.6927        | 697.3515       | 349.1794        | 696.3675       | 348.6874         | 731.4046  | 366.2060        | G    |           |           | 1863.1188 | 932.0630        | 1846.0922      | 923.5498        | 1845.1082      | 923.0777         | 1847.1001 | 924.0537          | 1848.1079 | 924.5576          | 16 |    |
| 9  | 813.4465  | 407.2269        | 796.4199       | 398.7136        | 795.4359       | 398.2216         | 830.4730  | 415.7402        | V    | 1775.0551 |           | 1806.0973 | 903.5523        | 1789.0708      | 895.0390        | 1788.0868      | 894.5470         | 1790.0786 | 895.5429          | 1791.0864 | 896.0468          | 15 |    |
| 10 | 969.5728  | 485.2900        | 952.5462       | 476.7767        | 951.5622       | 476.2847         | 986.5993  | 493.8033        | K    | 1604.9132 |           | 1707.0289 | 854.0181        | 1690.0024      | 845.5048        | 1689.0183      | 845.0128         | 1691.0102 | 846.0087          | 1692.0180 | 846.5126          | 14 |    |
| 11 | 1097.6677 | 549.3375        | 1080.6412      | 540.8242        | 1079.6572      | 540.3322         | 1114.6943 | 557.8508        | K    | 1476.8182 |           | 1550.9026 | 775.9550        | 1533.8761      | 767.4417        | 1532.8921      | 766.9497         | 1534.8839 | 767.9456          | 1535.8917 | 768.4495          | 13 |    |
| 12 | 1194.7205 | 597.8639        | 1177.6939      | 589.3506        | 1176.7099      | 588.8586         | 1211.7470 | 606.3772        | P    | 1379.7655 |           | 1422.8077 | 711.9075        | 1405.7811      | 703.3942        | 1404.7971      | 702.9022         | 1406.7890 | 703.8981          | 1407.7968 | 704.4020          | 12 |    |
| 13 | 1331.7794 | 666.3933        | 1314.7528      | 657.8801        | 1313.7688      | 657.3881         | 1348.8059 | 674.9066        | H    |           |           | 1325.7549 | 663.3811        | 1308.7284      | 654.8678        | 1307.7443      | 654.3758         | 1309.7362 | 655.3717          | 1310.7440 | 655.8756          | 11 |    |
| 14 | 1487.8805 | 744.4439        | 1470.8540      | 735.9306        | 1469.8699      | 735.4386         | 1504.9071 | 752.9572        | R    | 1086.6055 |           | 1188.6960 | 594.8516        | 1171.6695      | 586.3384        | 1170.6854      | 585.8464         | 1172.6773 | 586.8423          | 1173.6851 | 587.3462          | 10 |    |
| 15 | 1650.9438 | 825.9756        | 1633.9173      | 817.4623        | 1632.9333      | 816.9703         | 1667.9704 | 834.4888        | Y    |           |           | 1032.5949 | 516.8011        | 1015.5683      | 508.2878        | 1014.5843      | 507.7958         | 1016.5762 | 508.7917          | 1017.5840 | 509.2956          | 9  |    |
| 16 | 1807.0449 | 904.0261        | 1790.0184      | 895.5128        | 1789.0344      | 895.0208         | 1824.0715 | 912.5394        | R    | 767.4410  |           | 869.5316  | 435.2694        | 852.5050       | 426.7561        | 851.5210       | 426.2641         | 853.5128  | 427.2601          | 854.5207  | 427.7640          | 8  |    |
| 17 | 1904.0977 | 952.5525        | 1887.0712      | 944.0292        | 1886.0871      | 943.5472         | 1921.1243 | 961.0658        | P    | 670.3883  |           | 713.4305  | 357.2189        | 696.4039       | 348.2056        | 695.4199       | 348.2136         | 697.4117  | 349.2095          | 698.4196  | 349.7134          | 7  |    |
| 18 | 1961.1192 | 981.0632        | 1944.0926      | 972.5500        | 1943.1086      | 972.0579         | 1978.1457 | 989.5765        | G    |           |           | 616.3777  | 308.6925        | 599.3511       | 300.1792        | 598.3671       | 299.6872         | 600.3590  | 300.6831          | 601.3668  | 301.8170          | 6  |    |
| 19 | 2062.1669 | 1031.5871       | 2045.1403      | 1023.0738       | 2044.1563      | 1022.5818        | 2079.1934 | 1040.1003       | T    | 526.3348  | 528.3140  | 559.3562  | 280.1817        | 542.3297       | 271.6685        | 541.3457       | 271.1765         | 543.3375  | 272.1724          | 544.3453  | 272.6763          | 5  |    |
| 20 | 2161.2353 | 1081.1213       | 2144.2087      | 1072.6080       | 2143.2247      | 1072.1160        | 2178.2618 | 1089.6345       | V    | 427.2663  |           | 458.3085  | 229.6579        | 441.2820       | 221.1446        |                |                  | 442.2898  | 221.6485          | 443.2976  | 222.1525          | 4  |    |
| 21 | 2232.2724 | 1116.6398       | 2215.2458      | 1108.1266       | 2214.2618      | 1107.6345        | 2249.2989 | 1125.1531       | A    |           |           | 359.2401  | 180.1237        | 342.2136       | 171.6104        |                |                  | 343.2214  | 172.1143          | 344.2292  | 172.6183          | 3  |    |
| 22 | 2345.3564 | 1173.1819       | 2328.3299      | 1164.6686       | 2327.3459      | 1164.1766        | 2362.3830 | 1181.6951       | L    | 229.1295  |           | 288.2030  | 144.6051        | 271.1765       | 136.0919        |                |                  | 272.1843  | 136.5958          | 273.1921  | 137.0997          | 2  |    |
| 23 |           |                 |                |                 |                |                  |           |                 | R    | 73.0284   |           | 175.1190  | 88.0631         | 158.0924       | 79.5498         |                |                  | 159.1002  | 80.0538           | 160.1081  | 80.5577           | 1  |    |

Monoisotopic mass of neutral peptide Mr(calc): 2518.4608

Fixed modifications: Carbamidomethyl (C) (apply to specified residues or termini only)

Variable modifications:

K1 : Dimethyl\_KR (KR)

K10 : Dimethyl\_KR (KR)

Ions Score: 62 Expect: 0.0029

Matches : 47/403 fragment ions using 61 most intense peaks ([help](#))

# Mascot Search Results: Peptide View

Kme2SAPSTGGVKKme2KPHRYRPGTVALR

MS/MS Fragmentation of **KSA**P**STGGV**K**KPHRYRPGT**V**ALR**  
 Found in **sp|P84244|H33\_MOUSE** in **fgcz\_10090**, Histone H3.3 OS=Mus musculus GN=H3f3a

Match to Query 4067: 2532.474270 from(507.502130,5+) intensity(251277.0500) scans(3140) rtinseconds(1938.1316) index(1908)  
 Title: 1909: Scan 3140 (rt=32.3022) [s:\p749\Proteomics\ORBI\_2\andreamizzi\_20110517\_sperm\_trypsin\_GluC\_ETD\_CID\20110519\_02\_NaCl\_ziptipped\_2.RAW]  
 Data file 20110519\_02\_NaCl\_ziptipped\_2.mgf

Click mouse within plot area to zoom in by factor of two about that point  
 Or,   to  Da   
 Label all possible matches  Label matches used for scoring   
 Show Y-axis

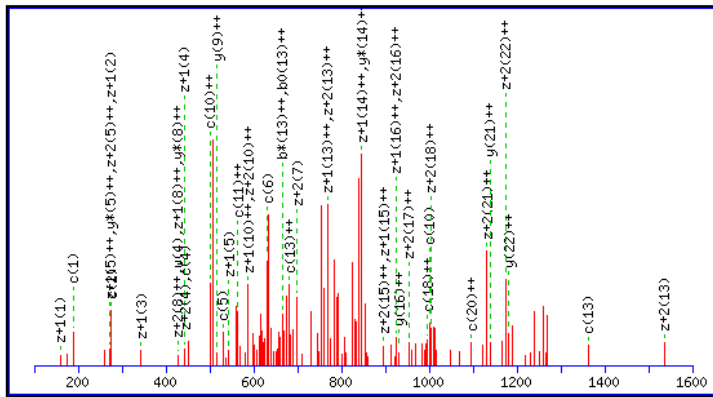

| #  | b         | b <sup>++</sup> | b <sup>*</sup> | b <sup>***</sup> | b <sup>0</sup> | b <sup>0++</sup> | c                | c <sup>++</sup>  | Seq. | w               | w'        | y         | y <sup>++</sup>  | y <sup>*</sup> | y <sup>***</sup> | y <sup>0</sup> | y <sup>0++</sup> | z+1             | z+1 <sup>++</sup> | z+2              | z+2 <sup>++</sup> | #         |          |          |
|----|-----------|-----------------|----------------|------------------|----------------|------------------|------------------|------------------|------|-----------------|-----------|-----------|------------------|----------------|------------------|----------------|------------------|-----------------|-------------------|------------------|-------------------|-----------|----------|----------|
| 1  | 171.1492  | 86.0782         | 154.1226       | 77.5630          |                |                  | <b>188.1737</b>  | 94.5915          | K    |                 |           |           |                  |                |                  |                |                  |                 |                   |                  |                   |           | 23       |          |
| 2  | 258.1812  | 129.5942        | 241.1547       | 121.0810         | 240.1707       | 120.5890         | <b>275.2078</b>  | 138.1075         | S    | 2330.3204       |           | 2363.3419 | <b>1182.1746</b> | 2346.3153      | 1173.6613        | 2345.3313      | 1173.1693        | 2347.3231       | 1174.1652         | 2348.3310        | <b>1174.6691</b>  | <b>22</b> |          |          |
| 3  | 329.2183  | 165.1128        | 312.1918       | 156.5995         | 311.2078       | 156.1075         | 346.2449         | 173.6261         | A    |                 |           | 2276.3098 | <b>1138.6586</b> | 2259.2833      | 1130.1453        | 2258.2993      | 1129.6533        | 2260.2911       | 1130.6492         | 2261.2989        | <b>1131.1531</b>  | <b>21</b> |          |          |
| 4  | 426.2711  | 213.6392        | 409.2445       | 205.1259         | 408.2605       | 204.6339         | <b>443.2976</b>  | 222.1525         | P    | 2162.2305       |           | 2205.2727 | 1103.1400        | 2188.2462      | 1094.6267        | 2187.2622      | 1094.1347        | 2189.2540       | 1095.1306         | 2190.2618        | 1095.6345         | <b>20</b> |          |          |
| 5  | 513.3031  | 257.1552        | 496.2766       | 248.6419         | 495.2926       | 248.1499         | <b>530.3297</b>  | 265.6685         | S    | 2075.1985       |           | 2108.2200 | 1054.6136        | 2091.1934      | 1046.1003        | 2090.2094      | 1045.6083        | 2092.2012       | 1046.6043         | 2093.2091        | 1047.1082         | <b>19</b> |          |          |
| 6  | 614.3308  | 307.6790        | 597.3243       | 299.1638         | 596.3402       | 298.6738         | <b>631.3774</b>  | 316.1923         | T    | 1988.1665       | 1990.1457 | 2021.1879 | 1011.0976        | 2004.1614      | 1002.5843        | 2003.1774      | 1002.0923        | 2005.1692       | 1003.0882         | 2006.1770        | <b>1003.5922</b>  | <b>18</b> |          |          |
| 7  | 671.3723  | 336.1898        | 654.3457       | 327.6765         | 653.3617       | 327.1845         | 688.3988         | 344.7030         | G    |                 |           | 1920.4402 | 960.5738         | 1903.1137      | 952.0605         | 1902.1297      | 951.5685         | 1904.1215       | 952.5644          | 1905.1293        | <b>953.0683</b>   | <b>17</b> |          |          |
| 8  | 728.3937  | 364.7005        | 711.3672       | 356.1872         | 710.3832       | 355.6952         | 745.4203         | 373.2138         | G    |                 |           | 1863.1188 | <b>932.0650</b>  | 1846.0922      | 923.5498         | 1845.1082      | 923.0577         | 1847.1001       | <b>924.0537</b>   | 1848.1079        | <b>924.5576</b>   | <b>16</b> |          |          |
| 9  | 827.4621  | 414.2347        | 810.4356       | 405.7214         | 809.4516       | 405.2294         | 844.4887         | 422.7480         | V    | 1775.0551       |           | 1806.0973 | 903.5523         | 1789.0708      | 905.0390         | 1788.0868      | 904.5470         | 1790.0786       | <b>895.5429</b>   | 1791.0864        | <b>896.0468</b>   | <b>15</b> |          |          |
| 10 | 983.5884  | 492.2978        | 966.5619       | 483.7846         | 965.5778       | 483.2926         | <b>1000.6150</b> | <b>500.8111</b>  | K    | 1604.9132       |           | 1707.0289 | 854.0181         | 1690.0024      | <b>845.5048</b>  | 1689.0183      | 845.0128         | 1691.0102       | <b>846.0087</b>   | 1692.0180        | 846.5126          | <b>14</b> |          |          |
| 11 | 1111.6834 | 556.3453        | 1094.6568      | 547.8320         | 1093.6728      | 547.3400         | 1128.7099        | <b>564.8586</b>  | K    | 1476.8182       |           | 1550.9026 | 775.9550         | 1533.8761      | 767.4417         | 1532.8921      | 766.9497         | 1534.8839       | <b>767.9456</b>   | <b>1535.8917</b> | <b>768.4495</b>   | <b>13</b> |          |          |
| 12 | 1208.7361 | 604.8717        | 1191.7096      | 596.3584         | 1190.7256      | 595.8664         | 1225.7627        | 613.3850         | P    | 1379.7655       |           | 1422.8077 | 711.9075         | 1405.7811      | 703.3942         | 1404.7971      | 702.9022         | 1406.7890       | 703.8981          | 1407.7968        | 704.4020          | <b>12</b> |          |          |
| 13 | 1345.7950 | 673.4012        | 1328.7685      | <b>664.8879</b>  | 1327.7845      | <b>664.3959</b>  | <b>1362.8216</b> | <b>681.9144</b>  | H    |                 |           | 1325.7549 | 663.3811         | 1308.7284      | 654.8678         | 1307.7443      | 654.3758         | 1309.7362       | 655.3717          | 1310.7440        | 655.8756          | <b>11</b> |          |          |
| 14 | 1501.8962 | 751.4517        | 1484.8696      | 742.9384         | 1483.8856      | 742.4464         | 1518.9227        | 759.9650         | R    | 1086.6055       |           | 1188.6960 | 594.8516         | 1171.6695      | 586.3384         | 1170.6854      | 585.8464         | 1172.6773       | <b>586.8423</b>   | 1173.6851        | <b>587.3462</b>   | <b>10</b> |          |          |
| 15 | 1664.9595 | 832.9834        | 1647.9329      | 824.4701         | 1646.9489      | 823.9781         | 1681.9860        | 841.4967         | Y    |                 |           | 1032.5949 | <b>516.8011</b>  | 1015.5883      | 508.2878         | 1014.5843      | 507.7958         | 1016.5762       | 508.7917          | 1017.5840        | 509.2956          | <b>9</b>  |          |          |
| 16 | 1821.0606 | 911.0339        | 1804.0340      | 902.5207         | 1803.0500      | 902.0287         | 1838.0871        | 919.5472         | R    | 767.4410        |           | 869.5316  | 435.2694         | 852.5050       | <b>426.7561</b>  | 851.5210       | 426.2641         | 853.5128        | <b>427.2601</b>   | 854.5207         | <b>427.7640</b>   | <b>8</b>  |          |          |
| 17 | 1918.1134 | 959.5603        | 1901.0868      | 951.0470         | 1900.1028      | 950.5550         | 1935.1399        | 968.0736         | P    | 670.3883        |           | 713.4305  | 357.2189         | 696.4039       | 348.7056         | 695.4199       | 348.2136         | 697.4117        | 349.2095          | <b>698.4196</b>  | 349.7134          | <b>7</b>  |          |          |
| 18 | 1975.1348 | 988.0711        | 1958.1083      | 979.5578         | 1957.1243      | 979.0658         | 1992.1614        | <b>996.5843</b>  | G    |                 |           | 616.3777  | 308.6925         | 599.3511       | 300.1792         | 598.3671       | 299.6872         | 600.3590        | 300.6831          | 601.3668         | 301.1870          | <b>6</b>  |          |          |
| 19 | 2076.1825 | 1088.5949       | 2059.1560      | 1030.0816        | 2058.1719      | 1029.5896        | 2093.2091        | 1047.1082        | T    | 526.3348        | 528.3140  | 559.3562  | 280.1817         | 542.3297       | <b>271.6685</b>  | 541.3457       | 271.1765         | <b>543.3375</b> | <b>272.1724</b>   | 544.3453         | <b>272.6763</b>   | <b>5</b>  |          |          |
| 20 | 2175.2509 | 1088.1291       | 2158.2244      | 1079.6158        | 2157.2404      | 1079.1238        | 2192.2775        | <b>1096.6424</b> | V    | <b>427.2663</b> |           | 458.3085  | 229.6579         | 441.2820       | 221.1446         |                |                  |                 |                   |                  |                   |           | <b>4</b> |          |
| 21 | 2246.2880 | 1123.6477       | 2229.2615      | 1115.1344        | 2228.2775      | 1114.6424        | 2263.3146        | 1132.1609        | A    |                 |           | 359.2401  | 180.1237         | 342.2136       | 171.6104         |                |                  |                 | <b>343.2214</b>   | 172.1143         | 344.2292          | 172.6183  | <b>3</b> |          |
| 22 | 2359.3721 | 1180.1897       | 2342.3455      | 1171.6764        | 2341.3615      | 1171.1844        | 2376.3986        | 1188.7030        | L    | 229.1295        |           | 288.2030  | 144.6051         | 271.1765       | 136.0919         |                |                  |                 |                   | <b>272.1843</b>  | 136.5958          | 273.1921  | 137.0997 | <b>2</b> |
| 23 |           |                 |                |                  |                |                  |                  |                  | R    | 73.0284         |           | 175.1190  | 88.0631          | 158.0924       | 79.5498          |                |                  |                 |                   | <b>159.1002</b>  | 80.0538           | 160.1081  | 80.5577  | <b>1</b> |

**Monoisotopic mass of neutral peptide Mr(calc):** 2532.4765  
**Fixed modifications:** Carbamidomethyl (C) (apply to specified residues or termini only)  
**Variable modifications:**  
 K1 : Trimethyl (K)  
 K10 : Dimethyl\_KR (KR)  
**Ions Score:** 43 **Expect:** 0.05  
**Matches :** 47/403 fragment ions using 64 most intense peaks ([help](#))

# Mascot Search Results: Peptide View

Kme3SAPSTGGV**K**me2KPHRYRPGT**V**ALR

MS/MS Fragmentation of **KSTGGKAPRKQLATK**

Found in **sp|P68433|H31\_MOUSE** in **fgcz\_10090**, Histone H3.1 OS=Mus musculus GN=Hist1h3a

Match to Query 2583: 1611.977016 from(404.001530,4+) intensity(103038.7900) scans(2242) rtinseconds(1320.9594) index(1420)

Title: 1421: Scan 2242 (rt=22.016) [s:\p749\Proteomics\ORBI\_2\andreamizzi\_20110517\_sperm\_trypsin\_GluC\_ETD\_CID\20110517\_02\_NaCl\_2.RAW]

Data file 20110517\_02\_NaCl\_2.mgf

Click mouse within plot area to zoom in by factor of two about that point

Or, Plot from  to  Da

Label all possible matches  Label matches used for scoring

Show Y-axis

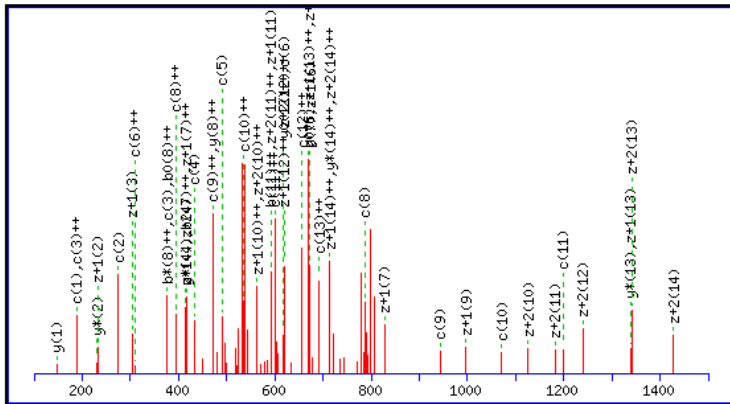

| #  | b         | b <sup>++</sup> | b <sup>*</sup> | b <sup>+++</sup> | b <sup>0</sup> | b <sup>0++</sup> | c         | c <sup>++</sup> | Seq. | w         | w'        | y         | y <sup>++</sup> | y <sup>*</sup> | y <sup>+++</sup> | y <sup>0</sup> | y <sup>0++</sup> | z+1       | z+1 <sup>++</sup> | z+2       | z+2 <sup>++</sup> | #  |    |
|----|-----------|-----------------|----------------|------------------|----------------|------------------|-----------|-----------------|------|-----------|-----------|-----------|-----------------|----------------|------------------|----------------|------------------|-----------|-------------------|-----------|-------------------|----|----|
| 1  | 171.1492  | 86.0782         | 154.1226       | 77.5650          |                |                  | 188.1757  | 94.5915         | K    |           |           |           |                 |                |                  |                |                  |           |                   |           |                   |    | 15 |
| 2  | 258.1812  | 129.5942        | 241.1547       | 121.0810         | 240.1707       | 120.5890         | 275.2078  | 138.1075        | S    | 1409.8223 |           | 1442.8438 | 721.9255        | 1425.8172      | 713.4123         | 1424.8332      | 712.9203         | 1426.8251 | 713.9162          | 1427.8329 | 714.4201          | 14 |    |
| 3  | 359.2289  | 180.1181        | 342.2023       | 171.6048         | 341.2183       | 171.1128         | 376.2354  | 188.6314        | T    | 1322.7903 | 1324.7696 | 1355.8118 | 678.4095        | 1338.7852      | 669.8962         | 1337.8012      | 669.4042         | 1339.7930 | 670.4002          | 1340.8009 | 670.9041          | 13 |    |
| 4  | 416.2304  | 208.6288        | 399.2238       | 200.1155         | 398.2398       | 199.6235         | 433.2769  | 217.1421        | G    |           |           | 1254.7641 | 627.8857        | 1237.7375      | 619.3724         | 1236.7535      | 618.8804         | 1238.7454 | 619.8703          | 1239.7532 | 620.3802          | 12 |    |
| 5  | 473.2718  | 237.1395        | 456.2453       | 228.6263         | 455.2613       | 228.1343         | 490.2984  | 245.6528        | G    |           |           | 1197.7426 | 599.3749        | 1180.7161      | 590.8617         | 1179.7321      | 590.3697         | 1181.7239 | 591.3656          | 1182.7317 | 591.8695          | 11 |    |
| 6  | 601.3668  | 301.1870        | 584.3402       | 292.6738         | 583.3562       | 292.1817         | 618.3933  | 309.7003        | K    | 1066.6368 |           | 1140.7212 | 570.8642        | 1123.6946      | 562.3509         | 1122.7106      | 561.8589         | 1124.7024 | 562.8549          | 1125.7103 | 563.3588          | 10 |    |
| 7  | 672.4039  | 336.7056        | 655.3774       | 328.1923         | 654.3933       | 327.7003         | 689.4305  | 345.2189        | A    |           |           | 1012.6262 | 506.8167        | 995.5996       | 498.3035         | 994.6156       | 497.8115         | 996.6075  | 498.8074          | 997.6153  | 499.3113          | 9  |    |
| 8  | 769.4567  | 385.2320        | 752.4301       | 376.7187         | 751.4461       | 376.2267         | 786.4832  | 393.7452        | P    | 898.5469  |           | 941.5891  | 471.2982        | 924.5625       | 462.7849         | 923.5785       | 462.2929         | 925.5704  | 463.2888          | 926.5782  | 463.7927          | 8  |    |
| 9  | 925.5576  | 463.2825        | 908.5312       | 454.7693         | 907.5472       | 454.2772         | 942.5843  | 471.7958        | R    | 742.4458  |           | 844.5363  | 422.7718        | 827.5098       | 414.2585         | 826.5257       | 413.7665         | 828.5176  | 414.7624          | 829.5254  | 415.2663          | 7  |    |
| 10 | 1053.6527 | 527.3300        | 1036.6262      | 518.8167         | 1035.6422      | 518.3247         | 1070.6793 | 535.8433        | K    | 614.3508  |           | 688.4352  | 344.7212        | 671.4087       | 336.2080         | 670.4246       | 335.7160         | 672.4165  | 336.7119          | 673.4243  | 337.2158          | 6  |    |
| 11 | 1181.7113 | 591.3593        | 1164.6848      | 582.8460         | 1163.7008      | 582.3540         | 1198.7379 | 599.8726        | Q    | 486.2922  |           | 560.3402  | 280.6738        | 543.3137       | 272.1605         | 542.3297       | 271.6685         | 544.3215  | 272.6644          | 545.3293  | 273.1683          | 5  |    |
| 12 | 1294.954  | 647.9013        | 1277.7688      | 639.3881         | 1276.7848      | 638.8960         | 1311.8219 | 656.4146        | L    | 373.2082  |           | 432.2817  | 216.6445        | 415.2551       | 208.1312         | 414.2711       | 207.6392         | 416.2629  | 208.6351          | 417.2708  | 209.1390          | 4  |    |
| 13 | 1365.8325 | 683.4199        | 1348.8059      | 674.9066         | 1347.8219      | 674.4146         | 1382.8590 | 691.9332        | A    |           |           | 319.1976  | 160.1024        | 302.1710       | 151.5892         | 301.1870       | 151.0972         | 303.1789  | 152.0931          | 304.1867  | 152.5970          | 3  |    |
| 14 | 1466.8802 | 733.9437        | 1449.8536      | 725.4305         | 1448.8696      | 724.9384         | 1483.9067 | 742.4570        | T    | 215.1390  | 217.1183  | 248.1605  | 124.5839        | 231.1339       | 116.0706         | 230.1499       | 115.5786         | 232.1418  | 116.5745          | 233.1496  | 117.0784          | 2  |    |
| 15 |           |                 |                |                  |                |                  |           |                 | K    | 73.0284   |           | 147.1128  | 74.0600         | 130.0863       | 65.5468          |                |                  | 131.0941  | 66.0507           | 132.1019  | 66.5546           | 1  |    |

Monoisotopic mass of neutral peptide Mr(calc): 1611.9784

Fixed modifications: Carbamidomethyl (C) (apply to specified residues or termini only)

Variable modifications:

K1 : Trimethyl (K)

Ions Score: 81 Expect: 1.3e-05

Matches : 55/260 fragment ions using 47 most intense peaks ([help](#))

# Mascot Search Results: Peptide View

Kme3STGGKAPRKQLATK

MS/MS Fragmentation of **KSTGGKAPRKQLATK**

Found in **sp|P68433|H31\_MOUSE** in **fgcz\_10090**, Histone H3.1 OS=Mus musculus GN=Hist1h3a

Match to Query 2561: 1597.961416 from(400.497630,4+) intensity(135076.5200) scans(2247) rtinseconds(1322.8751) index(1424)  
 Title: 1425: Scan 2247 (rt=22.0479) [s:\p749\Proteomics\ORBI\_2\andreamizzi\_20110517\_sperm\_trypsin\_GluC\_ETD\_CID\20110517\_02\_NaCl\_2.RAW]  
 Data file 20110517\_02\_NaCl\_2.mgf

Click mouse within plot area to zoom in by factor of two about that point

Or, Plot from  to  Da

Label all possible matches  Label matches used for scoring

Show Y-axis

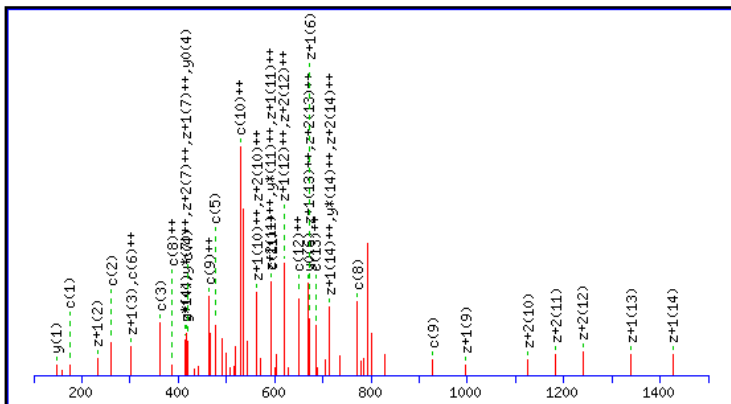

| #  | b         | b <sup>+</sup> | b <sup>+</sup> | b <sup>+</sup> | b <sup>0</sup> | b <sup>+</sup> | c         | c <sup>+</sup> | Seq. | w         | w <sup>+</sup> | y         | y <sup>+</sup> | y <sup>+</sup> | y <sup>+</sup> | y <sup>0</sup> | y <sup>+</sup> | z+1       | z+1 <sup>+</sup> | z+2       | z+2 <sup>+</sup> | #  |    |
|----|-----------|----------------|----------------|----------------|----------------|----------------|-----------|----------------|------|-----------|----------------|-----------|----------------|----------------|----------------|----------------|----------------|-----------|------------------|-----------|------------------|----|----|
| 1  | 157.1335  | 79.0704        | 140.1070       | 70.5571        |                |                | 174.1601  | 87.5837        | K    |           |                |           |                |                |                |                |                |           |                  |           |                  |    | 15 |
| 2  | 244.1656  | 122.5864       | 227.1390       | 114.0731       | 226.1550       | 113.5811       | 261.1921  | 131.0997       | S    | 1409.8223 |                | 1442.8438 | 721.9255       | 1425.8172      | 715.4123       | 1424.8332      | 712.9203       | 1426.8251 | 713.9162         | 1427.8329 | 714.4201         | 14 |    |
| 3  | 345.2132  | 173.1103       | 328.1867       | 164.5970       | 327.2027       | 164.1050       | 362.2398  | 181.6235       | T    | 1322.7903 | 1324.7696      | 1355.8118 | 678.4095       | 1338.7852      | 669.8962       | 1337.8012      | 669.4042       | 1339.7930 | 670.4002         | 1340.8009 | 670.9041         | 13 |    |
| 4  | 402.2347  | 201.6210       | 385.2082       | 193.1077       | 384.2241       | 192.6157       | 419.2613  | 210.1343       | G    |           |                | 1254.7641 | 627.8857       | 1237.7375      | 619.3724       | 1236.7535      | 618.8804       | 1238.7454 | 619.8763         | 1239.7532 | 620.3802         | 12 |    |
| 5  | 459.2562  | 230.1317       | 442.2296       | 221.6185       | 441.2456       | 221.1264       | 476.2827  | 238.6450       | G    |           |                | 1197.7426 | 599.3749       | 1180.7161      | 590.8617       | 1179.7321      | 590.3697       | 1181.7239 | 591.3656         | 1182.7317 | 591.8695         | 11 |    |
| 6  | 587.3511  | 294.1792       | 570.3246       | 285.6659       | 569.3406       | 285.1739       | 604.3777  | 302.6925       | K    | 1066.6368 |                | 1140.7212 | 570.8642       | 1123.6946      | 562.3509       | 1122.7106      | 561.8589       | 1124.7024 | 562.8549         | 1125.7103 | 563.3588         | 10 |    |
| 7  | 658.3883  | 329.6978       | 641.3617       | 321.1845       | 640.3777       | 320.6925       | 675.4148  | 338.2110       | A    |           |                | 1012.6262 | 506.8167       | 995.5996       | 498.3035       | 994.6156       | 497.8115       | 996.6075  | 498.8074         | 997.6153  | 499.3113         | 9  |    |
| 8  | 755.4410  | 378.2241       | 738.4145       | 369.7109       | 737.4304       | 369.2189       | 772.4676  | 386.7374       | P    | 898.5469  |                | 941.5891  | 471.2982       | 924.5625       | 462.7849       | 923.5785       | 462.2929       | 925.5704  | 463.2888         | 926.5782  | 463.7927         | 8  |    |
| 9  | 911.5421  | 456.2747       | 894.5156       | 447.7614       | 893.5316       | 447.2694       | 928.5687  | 464.7880       | R    | 742.4458  |                | 844.5363  | 422.7718       | 827.5098       | 414.2585       | 826.5257       | 413.7665       | 828.5176  | 414.7624         | 829.5254  | 415.2663         | 7  |    |
| 10 | 1039.6371 | 520.3222       | 1022.6105      | 511.8089       | 1021.6265      | 511.3169       | 1056.6636 | 528.8355       | K    | 614.3508  |                | 688.4352  | 344.7212       | 671.4087       | 336.2080       | 670.4246       | 335.7160       | 672.4165  | 336.7119         | 673.4243  | 337.2158         | 6  |    |
| 11 | 1167.6957 | 584.3515       | 1150.6691      | 575.8382       | 1149.6851      | 575.3462       | 1184.7222 | 592.8647       | Q    | 486.2922  |                | 560.3402  | 280.6738       | 543.3137       | 272.1605       | 542.3297       | 271.6685       | 544.3215  | 272.6644         | 545.3293  | 273.1683         | 5  |    |
| 12 | 1280.7797 | 640.8935       | 1263.7532      | 632.3802       | 1262.7692      | 631.8882       | 1297.8063 | 649.4068       | L    | 373.2082  |                | 432.2817  | 216.6445       | 415.2551       | 208.1312       | 414.2711       | 207.6392       | 416.2629  | 208.6351         | 417.2708  | 209.1390         | 4  |    |
| 13 | 1351.8168 | 676.4121       | 1334.7903      | 667.8988       | 1333.8063      | 667.4068       | 1368.8434 | 684.9233       | A    |           |                | 319.1976  | 160.1024       | 302.1710       | 151.5892       | 301.1870       | 151.0972       | 303.1789  | 152.0931         | 304.1867  | 152.5970         | 3  |    |
| 14 | 1452.8645 | 726.9359       | 1435.8380      | 718.4226       | 1434.8540      | 717.9306       | 1469.8911 | 735.4492       | T    | 215.1390  | 217.1183       | 248.1605  | 124.5839       | 231.1339       | 116.0706       | 230.1499       | 115.5786       | 232.1418  | 116.5745         | 233.1496  | 117.0784         | 2  |    |
| 15 |           |                |                |                |                |                |           |                | K    | 73.0284   |                | 147.1128  | 74.0600        | 130.0863       | 65.5468        |                |                | 131.0941  | 66.0507          | 132.1019  | 66.5546          | 1  |    |

**Monoisotopic mass of neutral peptide Mr(calc):** 1597.9627  
**Fixed modifications:** Carbamidomethyl (C) (apply to specified residues or termini only)  
**Variable modifications:**  
 K1 : Dimethyl\_KR (KR)  
**Ions Score:** 72 **Expect:** 2.8e-05  
**Matches:** 43/260 fragment ions using 38 most intense peaks ([help](#))

# Mascot Search Results: Peptide View

Kme2STGGKAPRKQLATK



MS/MS Fragmentation of **KSTGGKAPRKQLATK**

Found in **sp|P68433|H31\_MOUSE** in **fgcz\_10090**, Histone H3.1 OS=Mus musculus GN=Hist1h3a

Match to Query 1789: 1583.947336 from(396.994110,4+) intensity(22334.8790) scans(1701) rtinseconds(1315.3596) index(874)

Title: 875: Scan 1701 (rt=21.9227) [s:\p749\Proteomics\ORBI\_2\andreamizzi\_20110517\_sperm\_trypsin\_GluC\_ETD\_CID\20110519\_01\_NaCl\_ziptipped\_1.RAW]

Data file 20110519\_01\_NaCl\_ziptipped\_1.mgf

Click mouse within plot area to zoom in by factor of two about that point

Or, Plot from  to  Da

Label all possible matches  Label matches used for scoring

Show Y-axis

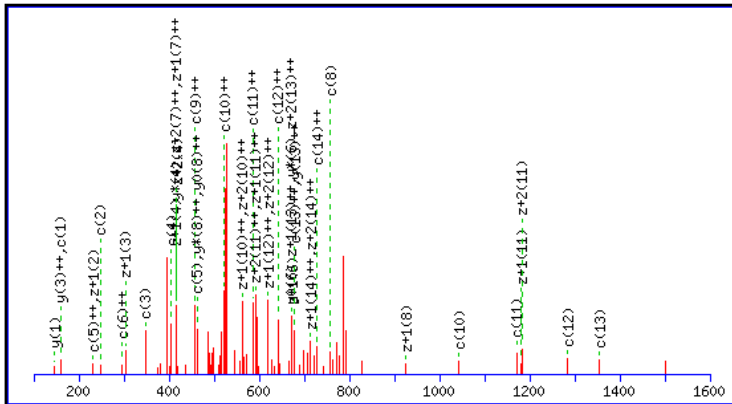

| #  | b         | b <sup>++</sup> | b <sup>*</sup> | b <sup>+++</sup> | b <sup>0</sup> | b <sup>0++</sup> | c                | c <sup>++</sup> | Seq. | w         | w'       | y               | y <sup>++</sup> | y <sup>*</sup>  | y <sup>+++</sup> | y <sup>0</sup>  | y <sup>0++</sup> | z+1              | z+1 <sup>++</sup> | z+2              | z+2 <sup>++</sup> | #       |    |
|----|-----------|-----------------|----------------|------------------|----------------|------------------|------------------|-----------------|------|-----------|----------|-----------------|-----------------|-----------------|------------------|-----------------|------------------|------------------|-------------------|------------------|-------------------|---------|----|
| 1  | 143.1179  | 72.0626         | 126.0913       | 63.5493          |                |                  | <b>160.1444</b>  | 80.5759         |      |           |          |                 |                 |                 |                  |                 |                  |                  |                   |                  |                   |         | 15 |
| 2  | 230.1499  | 115.5786        | 213.1234       | 107.0653         | 212.1394       | 106.5733         | <b>247.1765</b>  | 124.0919        | S    |           |          | 1442.8438       | 721.9255        | 1425.8172       | 713.4123         | 1424.8332       | 712.9202         | 1426.8251        | <b>713.9162</b>   | 1427.8329        | <b>714.4201</b>   | 14      |    |
| 3  | 331.1976  | 166.1024        | 314.1710       | 157.5892         | 313.1870       | 157.0972         | <b>348.2241</b>  | 174.6157        | T    |           |          | 1355.8118       | <b>678.4095</b> | 1338.7852       | 669.8962         | 1337.8012       | 669.4042         | 1339.7930        | <b>670.4002</b>   | 1340.8009        | <b>670.9041</b>   | 13      |    |
| 4  | 388.2191  | 194.6132        | 371.1925       | 186.0999         | 370.2085       | 185.6079         | <b>405.2456</b>  | 203.1264        | G    |           |          | 1254.7641       | 627.8857        | 1237.7375       | 619.3724         | 1236.7535       | 618.8804         | 1238.7454        | <b>619.8763</b>   | 1239.7532        | <b>620.3802</b>   | 12      |    |
| 5  | 445.2405  | 223.1239        | 428.2140       | 214.6106         | 427.2300       | 214.1186         | <b>462.2671</b>  | <b>231.6372</b> | G    |           |          | 1197.7426       | 599.3749        | 1180.7161       | 590.8617         | 1179.7321       | 590.3697         | <b>1181.7239</b> | <b>591.3656</b>   | <b>1182.7317</b> | <b>591.8695</b>   | 11      |    |
| 6  | 573.3355  | 287.1714        | 556.3089       | 278.6581         | 555.3249       | 278.1661         | 590.3620         | <b>295.6847</b> | K    | 1066.6368 |          | 1140.7212       | 570.8642        | 1123.6946       | 562.3509         | 1122.7106       | 561.8589         | 1124.7024        | <b>562.8549</b>   | 1125.7103        | <b>563.3588</b>   | 10      |    |
| 7  | 644.3726  | 322.6899        | 627.3461       | 314.1767         | 626.3620       | 313.6847         | 661.3992         | 331.2032        | A    |           |          | 1012.6262       | 506.8167        | 995.5996        | 498.3035         | 994.6156        | 497.8115         | 996.6075         | 498.8074          | 997.6153         | 499.3113          | 9       |    |
| 8  | 741.4254  | 371.2163        | 724.3988       | 362.7030         | 723.4148       | 362.2110         | <b>758.4519</b>  | 379.7296        | P    | 898.5469  |          | 941.5891        | 471.2982        | 924.5625        | <b>462.7849</b>  | 923.5785        | <b>462.2929</b>  | <b>925.5704</b>  | 463.2888          | 926.5782         | 463.7927          | 8       |    |
| 9  | 897.5265  | 449.2669        | 880.4999       | 440.7536         | 879.5159       | 440.2616         | 914.5530         | <b>457.7802</b> | T    | 742.4458  |          | 844.5363        | 422.7718        | 827.5098        | 414.2585         | 826.5257        | 413.7665         | 828.5176         | <b>414.7624</b>   | 829.5254         | <b>415.2663</b>   | 7       |    |
| 10 | 1025.6214 | 513.3144        | 1008.5949      | 504.8011         | 1007.6109      | 504.3091         | <b>1042.4480</b> | <b>521.8276</b> | K    | 614.3508  |          | 688.4352        | 344.7212        | <b>671.4087</b> | 336.2080         | <b>670.4246</b> | 335.7160         | <b>672.4165</b>  | 336.7119          | 673.4243         | 337.2158          | 6       |    |
| 11 | 1153.6800 | 577.3436        | 1136.6535      | 568.8304         | 1135.6695      | 568.3384         | <b>1170.7066</b> | <b>585.8569</b> | Q    | 486.2922  |          | 560.3402        | 280.6738        | 543.3137        | 272.1605         | 542.3297        | 271.6685         | 544.3215         | 272.6644          | 545.3293         | 273.1683          | 5       |    |
| 12 | 1266.7641 | 633.8857        | 1249.7375      | 625.3724         | 1248.7535      | 624.8804         | <b>1283.7906</b> | <b>643.3990</b> | L    | 373.2082  |          | 432.2817        | 216.6445        | <b>415.2551</b> | 208.1312         | 414.2711        | 207.6392         | <b>416.2629</b>  | 208.6351          | <b>417.2708</b>  | 209.1390          | 4       |    |
| 13 | 1337.8012 | 669.4042        | 1320.7746      | 660.8910         | 1319.7906      | 660.3990         | <b>1354.8277</b> | <b>677.9175</b> | A    |           |          | 319.1976        | <b>160.1024</b> | 302.1710        | 151.5892         | 301.1870        | 151.0972         | <b>303.1789</b>  | 152.0931          | 304.1867         | 152.5970          | 3       |    |
| 14 | 1438.8489 | 719.9281        | 1421.8223      | 711.4148         | 1420.8383      | 710.9228         | 1455.8754        | <b>728.4413</b> | T    | 215.1390  | 217.1183 | 248.1605        | 124.5839        | 231.1339        | 116.0706         | 230.1499        | 115.5786         | <b>232.1418</b>  | 116.5745          | 233.1496         | 117.0784          | 2       |    |
| 15 |           |                 |                |                  |                |                  |                  |                 | K    | 73.0284   |          | <b>147.1128</b> | 74.0600         | 130.0863        | 65.5468          |                 |                  |                  | 131.0941          | 66.0507          | 132.1019          | 66.5546 | 1  |

Monoisotopic mass of neutral peptide Mr(calc): 1583.9471

Fixed modifications: Carbamidomethyl (C) (apply to specified residues or termini only)

Variable modifications:

K1 : Methyl\_KR (KR)

Ions Score: 70 Expect: 4.4e-05

Matches : 46/260 fragment ions using 45 most intense peaks ([help](#))

# Mascot Search Results: Peptide View

Kme1STGGKAPRKQLATK

MS/MS Fragmentation of **GGAKRHRKVL**R

Found in **sp|P62806|H4\_MOUSE** in **fgcz\_10090**, Histone H4 OS=Mus musculus GN=Hist1h4a

Match to Query 1447: 1304.826296 from(327.213850,4+) intensity(54474.4140) scans(1245) rtinseconds(857.6954) index(627)

Title: 628: Scan 1245 (rt=14.2949) [s:\p749\Proteomics\ORBI\_2\andreamizzi\_20110310\_sperm\_trypsin\_chymo\_AspN\_ETD\_CID\20110310\_11\_NaCl\_trypsin.RAW]

Data file \\fgcz-ms.uzh.ch\p749\Proteomics\ORBI\_2\andreamizzi\_20110310\_sperm\_trypsin\_chymo\_AspN\_ETD\_CID\mgf\_low\_res\_MS2\_nomerge\20110310\_11\_NaCl\_trypsin.mgf

Click mouse within plot area to zoom in by factor of two about that point

Or, Plot from  to  Da

Label all possible matches  Label matches used for scoring

Show Y-axis

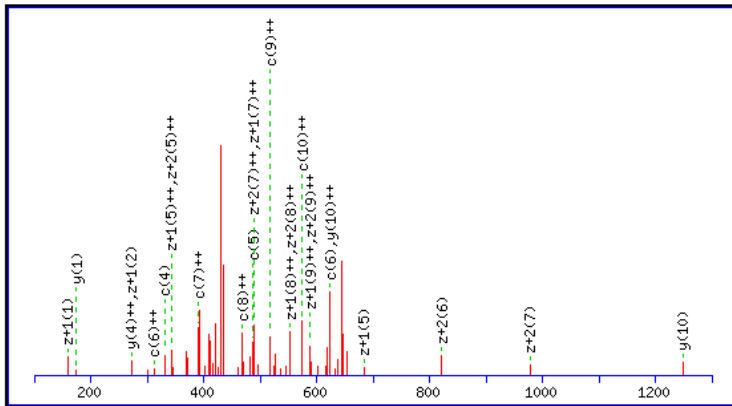

| #  | b         | b <sup>++</sup> | b <sup>*</sup> | b <sup>+++</sup> | c         | c <sup>++</sup> | Seq. | w         | y         | y <sup>++</sup> | y <sup>*</sup> | y <sup>+++</sup> | z+1       | z+1 <sup>++</sup> | z+2       | z+2 <sup>++</sup> | # |    |
|----|-----------|-----------------|----------------|------------------|-----------|-----------------|------|-----------|-----------|-----------------|----------------|------------------|-----------|-------------------|-----------|-------------------|---|----|
| 1  | 58.0287   | 29.5180         |                |                  | 75.0553   | 38.0313         | G    |           |           |                 |                |                  |           |                   |           |                   |   | 11 |
| 2  | 115.0502  | 58.0287         |                |                  | 132.0768  | 66.5420         | G    |           | 1248.8124 | 624.9098        | 1231.7858      | 616.3965         | 1232.7936 | 616.9005          | 1233.8015 | 617.4044          |   | 10 |
| 3  | 186.0873  | 93.5473         |                |                  | 203.1139  | 102.0606        | A    |           | 1191.7909 | 596.3991        | 1174.7644      | 587.8858         | 1175.7722 | 588.3897          | 1176.7800 | 588.8936          |   | 9  |
| 4  | 314.1823  | 157.5948        | 297.1557       | 149.0815         | 331.2088  | 166.1081        | K    | 1046.6694 | 1120.7538 | 560.8805        | 1103.7272      | 552.3673         | 1104.7351 | 552.8712          | 1105.7429 | 553.3751          |   | 8  |
| 5  | 470.2834  | 235.6453        | 453.2568       | 227.1321         | 487.3099  | 244.1586        | R    | 890.5683  | 992.6588  | 496.8331        | 975.6323       | 488.3198         | 976.6401  | 488.8237          | 977.6479  | 489.3276          |   | 7  |
| 6  | 607.3423  | 304.1748        | 590.3158       | 295.6615         | 624.3689  | 312.6881        | H    |           | 836.5577  | 418.7825        | 819.5312       | 410.2692         | 820.5390  | 410.7731          | 821.5468  | 411.2770          |   | 6  |
| 7  | 763.4434  | 382.2253        | 746.4169       | 373.7121         | 780.4700  | 390.7386        | R    | 597.4083  | 699.4988  | 350.2530        | 682.4723       | 341.7398         | 683.4801  | 342.2437          | 684.4879  | 342.7476          |   | 5  |
| 8  | 919.5697  | 460.2885        | 902.5431       | 451.7752         | 936.5962  | 468.8018        | K    | 441.2820  | 543.3977  | 272.2025        | 526.3711       | 263.6892         | 527.3790  | 264.1931          | 528.3868  | 264.6970          |   | 4  |
| 9  | 1018.6381 | 509.8227        | 1001.6115      | 501.3094         | 1035.6646 | 518.3360        | V    | 356.2292  | 387.2714  | 194.1394        | 370.2449       | 185.6261         | 371.2527  | 186.1300          | 372.2605  | 186.6339          |   | 3  |
| 10 | 1131.7222 | 566.3647        | 1114.6956      | 557.8514         | 1148.7487 | 574.8780        | L    | 229.1295  | 288.2030  | 144.6051        | 271.1765       | 136.0919         | 272.1843  | 136.5958          | 273.1921  | 137.0997          |   | 2  |
| 11 |           |                 |                |                  |           |                 | R    | 73.0284   | 175.1190  | 88.0631         | 158.0924       | 79.5498          | 159.1002  | 80.0538           | 160.1081  | 80.5577           |   | 1  |

Monoisotopic mass of neutral peptide Mr(calc): 1304.8265

Fixed modifications: Carbamidomethyl (C) (apply to specified residues or termini only)

Variable modifications:

K8 : Dimethyl\_KR (KR)

Ions Score: 42 Expect: 0.02

Matches : 25/141 fragment ions using 26 most intense peaks ([help](#))

# Mascot Search Results: Peptide View

GGAKRHRKme2VLR

MS/MS Fragmentation of **GKGGKGLGKGGAKR**

Found in **sp|P62806|H4\_MOUSE** in **fgcz\_10090**, Histone H4 OS=Mus musculus GN=Hist1h4a

Match to Query 1549: 1395.794202 from(466.272010,3+) intensity(35282.6720) scans(2761) rtinseconds(1633.4172) index(1438)

Title: 1439: Scan 2761 (rt=27.2236) [s:\p749\Proteomics\ORBI\_2\andreamizzi\_201110127\_sperm\_trypsin\_ETD\_CID\20110127\_08\_ON7\_saltex.RAW]

Data file W\fgcz-ms.uzh.ch\p749\Proteomics\ORBI\_2\andreamizzi\_20110127\_sperm\_trypsin\_ETD\_CID\mgf\_low\_res\_MS2\_nomerge\20110127\_08\_ON7\_saltex.mgf

Click mouse within plot area to zoom in by factor of two about that point

Or Plot from  to  Da

Label all possible matches  Label matches used for scoring

Show Y-axis

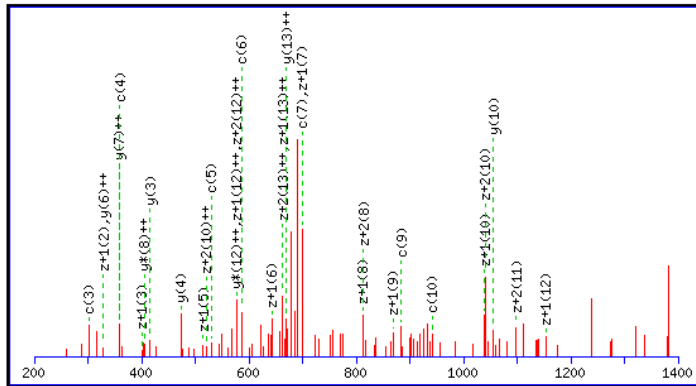

| #  | b         | b <sup>++</sup> | b <sup>*</sup> | b <sup>+++</sup> | c         | c <sup>++</sup> | Seq. | w         | y         | y <sup>++</sup> | y <sup>*</sup> | y <sup>+++</sup> | z+1       | z+1 <sup>++</sup> | z+2       | z+2 <sup>++</sup> | #  |
|----|-----------|-----------------|----------------|------------------|-----------|-----------------|------|-----------|-----------|-----------------|----------------|------------------|-----------|-------------------|-----------|-------------------|----|
| 1  | 58.0287   | 29.5180         |                |                  | 75.0553   | 38.0313         | G    |           |           |                 |                |                  |           |                   |           |                   | 14 |
| 2  | 228.1343  | 114.5708        | 211.1077       | 106.0575         | 245.1608  | 123.0840        | K    | 1223.6855 | 1339.7805 | 670.3939        | 1322.7539      | 661.8806         | 1323.7617 | 662.3845          | 1324.7696 | 662.8884          | 13 |
| 3  | 285.1557  | 143.0815        | 268.1292       | 134.5682         | 302.1823  | 151.5948        | G    |           | 1169.6749 | 585.3411        | 1152.6484      | 576.8278         | 1153.6562 | 577.3317          | 1154.6640 | 577.8357          | 12 |
| 4  | 342.1772  | 171.5922        | 325.1506       | 163.0790         | 359.2037  | 180.1055        | G    |           | 1112.6535 | 556.8304        | 1095.6269      | 548.3171         | 1096.6347 | 548.8210          | 1097.6426 | 549.3249          | 11 |
| 5  | 512.2827  | 256.6450        | 495.2562       | 248.1317         | 529.3093  | 265.1583        | K    | 939.5370  | 1055.6320 | 528.3196        | 1038.6055      | 519.8064         | 1039.6133 | 520.3103          | 1040.6211 | 520.8142          | 10 |
| 6  | 569.3042  | 285.1557        | 552.2776       | 276.6425         | 586.3307  | 293.6690        | G    |           | 885.5265  | 443.2669        | 868.4999       | 434.7536         | 869.5078  | 435.2575          | 870.5156  | 435.7614          | 9  |
| 7  | 682.3883  | 341.6978        | 665.3617       | 333.1845         | 699.4148  | 350.2110        | L    | 769.4315  | 828.5050  | 414.7561        | 811.4785       | 406.2429         | 812.4863  | 406.7468          | 813.4941  | 407.2507          | 8  |
| 8  | 739.4097  | 370.2085        | 722.3832       | 361.6952         | 756.4363  | 378.7218        | G    |           | 715.4209  | 358.2141        | 698.3944       | 349.7008         | 699.4022  | 350.2048          | 700.4101  | 350.7087          | 7  |
| 9  | 867.5047  | 434.2560        | 850.4781       | 425.7427         | 884.5312  | 442.7693        | K    | 584.3151  | 658.3995  | 329.7034        | 641.3729       | 321.1901         | 642.3808  | 321.6940          | 643.3886  | 322.1979          | 6  |
| 10 | 924.5261  | 462.7667        | 907.4996       | 454.2534         | 941.5527  | 471.2800        | G    |           | 530.3045  | 265.6559        | 513.2780       | 257.1426         | 514.2858  | 257.6465          | 515.2936  | 258.1504          | 5  |
| 11 | 981.5476  | 491.2774        | 964.5211       | 482.7642         | 998.5742  | 499.7907        | G    |           | 473.2831  | 237.1452        | 456.2565       | 228.6319         | 457.2643  | 229.1358          | 458.2722  | 229.6397          | 4  |
| 12 | 1052.5847 | 526.7960        | 1035.5582      | 518.2827         | 1069.6113 | 535.3093        | A    |           | 416.2616  | 208.6344        | 399.2350       | 200.1212         | 400.2429  | 200.6251          | 401.2507  | 201.1290          | 3  |
| 13 | 1222.6902 | 611.8488        | 1205.6637      | 603.3355         | 1239.7168 | 620.3620        | K    | 229.1295  | 345.2245  | 173.1159        | 328.1979       | 164.6026         | 329.2058  | 165.1065          | 330.2136  | 165.6104          | 2  |
| 14 |           |                 |                |                  |           |                 | R    | 73.0284   | 175.1190  | 88.0631         | 158.0924       | 79.5498          | 159.1002  | 80.0538           | 160.1081  | 80.5577           | 1  |

Monoisotopic mass of neutral peptide Mr(calc): 1395.7946

Fixed modifications: Carbamidomethyl (C) (apply to specified residues or termini only)

Variable modifications:

K2 : Acetyl (K)

K5 : Acetyl (K)

K13 : Acetyl (K)

Ions Score: 45 Expect: 0.002

Matches : 32/186 fragment ions using 62 most intense peaks ([help](#))

# Mascot Search Results: Peptide View

GKacGGKacGLGKGGAKacR

MS/MS Fragmentation of **GKGGKGLGKGGAKR**

Found in **sp|P62806|H4\_MOUSE** in **fgcz\_10090**, Histone H4 OS=Mus musculus GN=Hist1h4a

Match to Query 1643: 1437.806048 from(719.910300,2+) intensity(118046.9800) scans(3659) rtinseconds(2166.5045) index(2337)

Title: 2338: Scan 3659 (rt=36.1084) [s:\p749\Proteomics\ORBI\_2\andreamizzi\_20110517\_sperm\_trypsin\_GluC\_ETD\_CID\20110519\_02\_NaCl\_ziptipped\_2.RAW]

Data file 20110519\_02\_NaCl\_ziptipped\_2.mgf

Click mouse within plot area to zoom in by factor of two about that point

Or, Plot from  to  Da

Label all possible matches  Label matches used for scoring

Show Y-axis

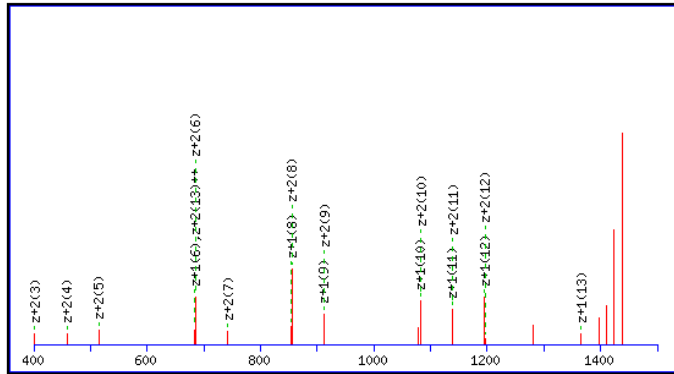

| #  | b         | b <sup>++</sup> | b <sup>*</sup> | b <sup>+++</sup> | c         | c <sup>++</sup> | Seq. | w         | y         | y <sup>++</sup> | y <sup>*</sup> | y <sup>+++</sup> | z+1       | z+1 <sup>++</sup> | z+2       | z+2 <sup>++</sup> | #  |
|----|-----------|-----------------|----------------|------------------|-----------|-----------------|------|-----------|-----------|-----------------|----------------|------------------|-----------|-------------------|-----------|-------------------|----|
| 1  | 58.0287   | 29.5180         |                |                  | 75.0553   | 38.0313         | G    |           |           |                 |                |                  |           |                   |           |                   | 14 |
| 2  | 228.1343  | 114.5708        | 211.1077       | 106.0575         | 245.1608  | 123.0840        | K    | 1265.6961 | 1381.7910 | 691.3992        | 1364.7645      | 682.8859         | 1365.7723 | 683.3898          | 1366.7801 | 683.8937          | 13 |
| 3  | 285.1557  | 143.0815        | 268.1292       | 134.5682         | 302.1823  | 151.5948        | G    |           | 1211.6855 | 606.3464        | 1194.6589      | 597.8331         | 1195.6668 | 598.3370          | 1196.6746 | 598.8409          | 12 |
| 4  | 342.1772  | 171.5922        | 325.1506       | 163.0790         | 359.2037  | 180.1055        | G    |           | 1154.6640 | 577.8357        | 1137.6375      | 569.3224         | 1138.6453 | 569.8263          | 1139.6531 | 570.3302          | 11 |
| 5  | 512.2827  | 256.6450        | 495.2562       | 248.1317         | 529.3093  | 265.1583        | K    | 981.5476  | 1097.6426 | 549.3249        | 1080.6160      | 540.8116         | 1081.6238 | 541.3156          | 1082.6317 | 541.8195          | 10 |
| 6  | 569.3042  | 285.1557        | 552.2776       | 276.6425         | 586.3307  | 293.6690        | G    |           | 927.5370  | 464.2722        | 910.5105       | 455.7589         | 911.5183  | 456.2628          | 912.5261  | 456.7667          | 9  |
| 7  | 682.3883  | 341.6978        | 665.3617       | 333.1845         | 699.4148  | 350.2110        | L    | 811.4421  | 870.5156  | 435.7614        | 853.4890       | 427.2482         | 854.4969  | 427.7521          | 855.5047  | 428.2560          | 8  |
| 8  | 739.4097  | 370.2085        | 722.3832       | 361.6952         | 756.4363  | 378.7218        | G    |           | 757.4315  | 379.2194        | 740.4050       | 370.7061         | 741.4128  | 371.2100          | 742.4206  | 371.7139          | 7  |
| 9  | 909.5152  | 455.2613        | 892.4887       | 446.7480         | 926.5418  | 463.7745        | K    | 584.3151  | 700.4101  | 350.7087        | 683.3835       | 342.1954         | 684.3913  | 342.6993          | 685.3992  | 343.2032          | 6  |
| 10 | 966.5367  | 483.7720        | 949.5102       | 475.2587         | 983.5633  | 492.2853        | G    |           | 530.3045  | 265.6559        | 513.2780       | 257.1426         | 514.2858  | 257.6465          | 515.2936  | 258.1504          | 5  |
| 11 | 1023.5582 | 512.2827        | 1006.5316      | 503.7694         | 1040.5847 | 520.7960        | G    |           | 473.2831  | 237.1452        | 456.2565       | 228.6319         | 457.2643  | 229.1358          | 458.2722  | 229.6397          | 4  |
| 12 | 1094.5953 | 547.8013        | 1077.5687      | 539.2880         | 1111.6218 | 556.3146        | A    |           | 416.2616  | 208.6344        | 399.2350       | 200.1212         | 400.2429  | 200.6251          | 401.2507  | 201.1290          | 3  |
| 13 | 1264.7008 | 632.8540        | 1247.6743      | 624.3408         | 1281.7274 | 641.3673        | K    | 229.1295  | 345.2245  | 173.1159        | 328.1979       | 164.6026         | 329.2058  | 165.1065          | 330.2136  | 165.6104          | 2  |
| 14 |           |                 |                |                  |           |                 | R    | 73.0284   | 175.1190  | 88.0631         | 158.0924       | 79.5498          | 159.1002  | 80.0538           | 160.1081  | 80.5577           | 1  |

Monoisotopic mass of neutral peptide Mr(calc): 1437.8052

Fixed modifications: Carbamidomethyl (C) (apply to specified residues or termini only)

Variable modifications:

K2 : Acetyl (K)

K5 : Acetyl (K)

K9 : Acetyl (K)

K13 : Acetyl (K)

Ions Score: 95 Expect: 5.8e-07

Matches : 18/186 fragment ions using 22 most intense peaks ([help](#))

# Mascot Search Results: Peptide View

GKacGGKacGLGKacGGAKacR

MS/MS Fragmentation of **HRKVLDRNIQGITKPAIR**

Found in **sp|P62806|H4\_MOUSE** in **fgcz\_10090**, Histone H4 OS=Mus musculus GN=Hist1h4a

Match to Query 2483: 2156.303496 from(540.083150,4+) intensity(203420.1600) scans(3026) rtinseconds(1908.7141) index(1494)

Title: 1495: Scan 3026 (rt=31.8119) [s:\p749\Proteomics\ORBI\_2\andreamizzi\_201110127\_sperm\_trypsin\_ETD\_CID\20110127\_09\_2h7\_saltex.RAW]

Data file \f\fgcz-ms.uzh.ch\p749\Proteomics\ORBI\_2\andreamizzi\_20110127\_sperm\_trypsin\_ETD\_CID\mgf\_low\_res\_MS2\_nomerge\20110127\_09\_2h7\_saltex.mgf

Click mouse within plot area to zoom in by factor of two about that point

Or,   to  Da

Label all possible matches  Label matches used for scoring

Show Y-axis

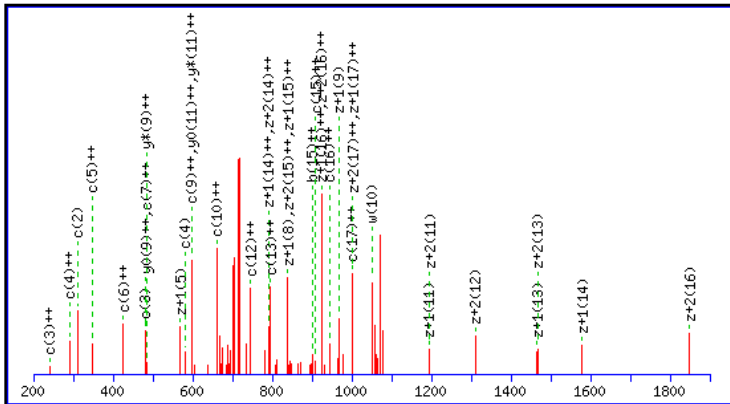

| #  | b         | b**      | b*        | b***     | b <sup>0</sup> | b <sup>0</sup> ** | c         | c**       | Seq. | w         | w'        | y         | y**       | y*        | y***      | y <sup>0</sup> | y <sup>0</sup> ** | z+1       | z+1**     | z+2       | z+2**     | #  |    |
|----|-----------|----------|-----------|----------|----------------|-------------------|-----------|-----------|------|-----------|-----------|-----------|-----------|-----------|-----------|----------------|-------------------|-----------|-----------|-----------|-----------|----|----|
| 1  | 138.0662  | 69.5367  |           |          |                |                   | 155.0927  | 78.0500   | H    |           |           |           |           |           |           |                |                   |           |           |           |           |    | 18 |
| 2  | 294.1673  | 147.5873 | 277.1408  | 139.0740 |                |                   | 311.1938  | 156.1006  | R    | 1918.1596 |           | 2020.2502 | 1010.6287 | 2003.2236 | 1002.1155 | 2002.2396      | 1001.6234         | 2004.2315 | 1002.6194 | 2005.2393 | 1003.1233 | 17 |    |
| 3  | 464.3092  | 232.6582 | 447.2827  | 224.1450 |                |                   | 481.3358  | 241.1713  | K    | 1748.0177 |           | 1864.1491 | 932.5782  | 1847.1225 | 924.0649  | 1846.1385      | 923.5729          | 1848.1304 | 924.5688  | 1849.1382 | 925.0727  | 16 |    |
| 4  | 563.3776  | 282.1925 | 546.3511  | 273.6792 |                |                   | 580.4042  | 290.7057  | V    | 1662.9650 |           | 1694.0072 | 847.5072  | 1676.9806 | 838.9939  | 1675.9966      | 838.5019          | 1677.9884 | 839.4979  | 1678.9963 | 840.0018  | 15 |    |
| 5  | 676.4617  | 338.7345 | 659.4351  | 330.2212 |                |                   | 693.4882  | 347.2478  | L    | 1535.8653 |           | 1594.9388 | 797.9730  | 1577.9122 | 789.4597  | 1576.9282      | 788.9677          | 1578.9200 | 789.9637  | 1579.9279 | 790.4676  | 14 |    |
| 6  | 832.5628  | 416.7850 | 815.5363  | 408.2718 |                |                   | 849.5894  | 425.2983  | R    | 1379.7641 |           | 1481.8547 | 741.4310  | 1464.8281 | 732.9177  | 1463.8441      | 732.4257          | 1465.8360 | 733.4216  | 1466.8438 | 733.9255  | 13 |    |
| 7  | 947.5897  | 474.2985 | 930.5632  | 465.7852 | 929.5792       | 465.2932          | 964.6163  | 482.8178  | D    | 1264.7372 |           | 1325.7536 | 663.3804  | 1308.7270 | 654.8672  | 1307.7430      | 654.3751          | 1309.7349 | 655.3711  | 1310.7427 | 655.8750  | 12 |    |
| 8  | 1061.6327 | 531.3200 | 1044.6061 | 522.8067 | 1043.6221      | 522.3147          | 1078.6592 | 539.8332  | N    | 1150.6943 |           | 1210.7266 | 608.8670  | 1195.7001 | 597.3537  | 1192.7161      | 596.8617          | 1194.7079 | 597.8576  | 1195.7157 | 598.3615  | 11 |    |
| 9  | 1174.7167 | 587.8620 | 1157.6902 | 579.3487 | 1156.7062      | 578.8567          | 1191.7433 | 596.3753  | I    | 1051.6259 | 1065.6415 | 1096.6837 | 548.8455  | 1079.6572 | 540.3322  | 1078.6731      | 539.8402          | 1080.6650 | 540.8361  | 1081.6728 | 541.3400  | 10 |    |
| 10 | 1302.7753 | 651.8913 | 1285.7488 | 643.3780 | 1284.7647      | 642.8860          | 1319.8019 | 660.4046  | Q    | 909.5516  |           | 983.5996  | 492.3035  | 966.5731  | 483.7902  | 965.5891       | 483.2982          | 967.5809  | 484.2941  | 968.5887  | 484.7980  | 9  |    |
| 11 | 1359.7968 | 680.4020 | 1342.7702 | 671.8888 | 1341.7862      | 671.3967          | 1376.8233 | 688.9153  | G    |           |           | 855.5411  | 428.2742  | 838.5145  | 419.7609  | 837.5305       | 419.2689          | 839.5223  | 420.2648  | 840.5302  | 420.7687  | 8  |    |
| 12 | 1472.8808 | 736.9441 | 1455.8543 | 728.4308 | 1454.8703      | 727.9388          | 1489.9074 | 745.4573  | T    | 753.4618  | 767.4774  | 798.5196  | 399.7634  | 781.4931  | 391.2502  | 780.5090       | 390.7582          | 782.5009  | 391.7541  | 783.5087  | 392.2580  | 7  |    |
| 13 | 1573.9285 | 787.4679 | 1556.9020 | 778.9546 | 1555.9180      | 778.4626          | 1590.9551 | 795.9812  | T    | 652.4141  | 654.3933  | 685.4355  | 343.2214  | 668.4090  | 334.7081  | 667.4250       | 334.2161          | 669.4168  | 335.2120  | 670.4246  | 335.7160  | 6  |    |
| 14 | 1702.0235 | 851.5154 | 1684.9969 | 843.0021 | 1684.0129      | 842.5101          | 1719.0500 | 860.0287  | K    | 510.3035  |           | 584.3879  | 292.6976  | 567.3613  | 284.1843  |                |                   | 568.3691  | 284.6882  | 569.3770  | 285.1921  | 5  |    |
| 15 | 1799.0762 | 900.0418 | 1782.0497 | 891.5285 | 1781.0657      | 891.0365          | 1816.1028 | 908.5550  | P    | 413.2507  |           | 456.2929  | 228.6501  | 439.2663  | 220.1368  |                |                   | 440.2742  | 220.6407  | 441.2820  | 221.1446  | 4  |    |
| 16 | 1870.1134 | 935.5603 | 1853.0868 | 927.0470 | 1852.1028      | 926.5550          | 1887.1399 | 944.0736  | A    |           |           | 359.2401  | 180.1237  | 342.2136  | 171.6104  |                |                   | 343.2214  | 172.1143  | 344.2292  | 172.6183  | 3  |    |
| 17 | 1983.1974 | 992.1024 | 1966.1709 | 983.5891 | 1965.1869      | 983.0971          | 2000.2240 | 1000.6156 | I    | 243.1452  | 257.1608  | 288.2030  | 144.6051  | 271.1765  | 136.0919  |                |                   | 272.1843  | 136.5958  | 273.1921  | 137.0997  | 2  |    |
| 18 |           |          |           |          |                |                   |           |           | R    | 73.0284   |           | 175.1190  | 88.0631   | 158.0924  | 79.5498   |                |                   | 159.1002  | 80.0538   | 160.1081  | 80.5577   | 1  |    |

**Monoisotopic mass of neutral peptide Mr(calc):** 2156.3018

**Fixed modifications:** Carbamidomethyl (C) (apply to specified residues or termini only)

**Variable modifications:**

**K3** : Trimethyl (K)

**Ions Score:** 95 **Expect:** 5.5e-07

**Matches** : 39/301 fragment ions using 39 most intense peaks ([help](#))

# Mascot Search Results: Peptide View

HRKme3VLDRNIQGITKPAIR

MS/MS Fragmentation of **HRKVLDRDNIQGITKPAIR**

Found in **sp|P62806|H4\_MOUSE** in **fgcz\_10090**, Histone H4 OS=Mus musculus GN=Hist1h4a

Match to Query 2834: 2142.287456 from(536.579140,4+) intensity(238197.0900) scans(3650) rtinseconds(2156.5633) index(2180)

Title: 2181: Scan 3650 (rt=35.9427) [s:\p749\Proteomics\ORBI\_2\andreamizzi\_20110310\_sperm\_trypsin\_chymo\_AspN\_ETD\_CID\20110310\_11\_NaCl\_trypsin.RAW]

Data file \\fgcz-ms.uzh.ch\p749\Proteomics\ORBI\_2\andreamizzi\_20110310\_sperm\_trypsin\_chymo\_AspN\_ETD\_CID\mgf\_low\_res\_MS2\_nomerge\20110310\_11\_NaCl\_trypsin.mgf

Click mouse within plot area to zoom in by factor of two about that point

Or, Plot from  to  Da

Label all possible matches  Label matches used for scoring

Show Y-axis

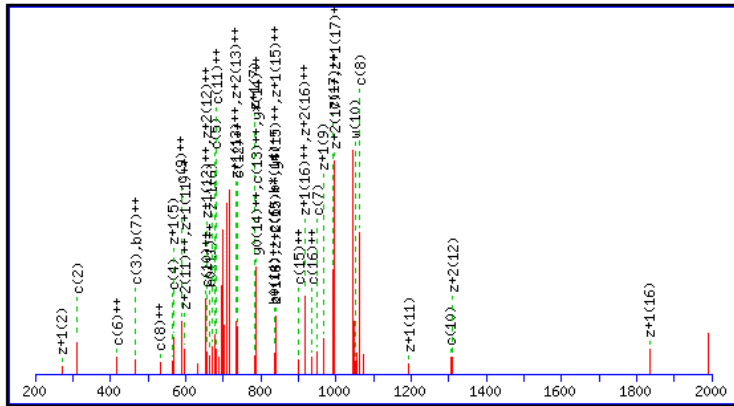

| #  | b         | b <sup>++</sup> | b <sup>*</sup> | b <sup>+++</sup> | b <sup>0</sup> | b <sup>0+</sup> | c                | c <sup>+</sup>  | Seq. | w                | w'        | y         | y <sup>++</sup> | y <sup>*</sup> | y <sup>+++</sup> | y <sup>0</sup> | y <sup>0+</sup> | z+1              | z+1 <sup>++</sup> | z+2       | z+2 <sup>++</sup> | #  |    |
|----|-----------|-----------------|----------------|------------------|----------------|-----------------|------------------|-----------------|------|------------------|-----------|-----------|-----------------|----------------|------------------|----------------|-----------------|------------------|-------------------|-----------|-------------------|----|----|
| 1  | 138.0662  | 69.5367         |                |                  |                |                 | 155.0927         | 78.0500         | H    |                  |           |           |                 |                |                  |                |                 |                  |                   |           |                   |    | 18 |
| 2  | 294.1673  | 147.5873        | 277.1408       | 139.0740         |                |                 | <b>311.1938</b>  | 156.1006        | R    | 1904.1440        |           | 2006.2345 | 1003.6209       | 1989.2080      | 995.1076         | 1988.2240      | 994.6156        | 1990.2158        | <b>995.6115</b>   | 1991.2236 | <b>996.1155</b>   | 17 |    |
| 3  | 450.2936  | 225.6504        | 433.2670       | 217.1371         |                |                 | <b>467.3207</b>  | 234.1637        | K    | 1748.0177        |           | 1850.1334 | 925.5704        | 1833.1069      | 917.0571         | 1832.1229      | 916.5651        | <b>1834.1147</b> | <b>917.5610</b>   | 1835.1225 | <b>918.0649</b>   | 16 |    |
| 4  | 549.3620  | 275.1846        | 532.3354       | 266.6714         |                |                 | <b>566.3885</b>  | 283.6979        | V    | 1662.9650        |           | 1694.0072 | 847.5072        | 1676.9806      | <b>838.9399</b>  | 1675.9966      | 838.5019        | 1677.9884        | <b>839.4979</b>   | 1678.9963 | <b>840.0018</b>   | 15 |    |
| 5  | 662.4460  | 331.2267        | 645.4195       | 323.2134         |                |                 | <b>679.4726</b>  | 340.2399        | L    | 1535.8653        |           | 1594.9388 | 797.9730        | 1577.9122      | <b>789.4597</b>  | 1576.9282      | <b>788.9677</b> | 1578.9200        | 789.9637          | 1579.9279 | 790.4676          | 14 |    |
| 6  | 818.5472  | 409.7772        | 801.5206       | 401.2639         |                |                 | <b>835.5737</b>  | <b>418.2905</b> | R    | 1379.7641        |           | 1481.8547 | 741.4310        | 1464.8281      | 732.9177         | 1463.8441      | 732.4257        | 1465.8360        | <b>733.4216</b>   | 1466.8438 | <b>733.9255</b>   | 13 |    |
| 7  | 933.5741  | <b>467.2907</b> | 916.5475       | 458.7774         | 915.5635       | 458.2854        | <b>950.6006</b>  | 475.8040        | D    | 1264.7372        |           | 1325.7536 | 663.3804        | 1308.7270      | 654.8672         | 1307.7430      | 654.3751        | 1309.7349        | <b>655.3711</b>   | 1310.7427 | <b>655.8750</b>   | 12 |    |
| 8  | 1047.6170 | 524.3121        | 1030.5905      | 515.7989         | 1029.6065      | 515.3069        | <b>1064.6436</b> | <b>532.8254</b> | N    | 1150.6943        |           | 1210.7266 | 605.8670        | 1193.7001      | 597.3537         | 1192.7161      | 596.8617        | <b>1194.7079</b> | <b>597.8576</b>   | 1195.7157 | <b>598.3615</b>   | 11 |    |
| 9  | 1160.7011 | 580.8542        | 1143.6745      | 572.3409         | 1142.6905      | 571.8489        | 1177.7276        | <b>589.3675</b> | I    | <b>1051.6259</b> | 1065.6415 | 1096.6837 | 548.8455        | 1079.6572      | 540.3322         | 1078.6731      | 539.8402        | 1080.6650        | 540.8361          | 1081.6728 | 541.3400          | 10 |    |
| 10 | 1288.7597 | 644.8835        | 1271.7331      | 636.3702         | 1270.7491      | 635.8782        | <b>1305.7862</b> | <b>653.3967</b> | Q    | 909.5516         |           | 983.5996  | 492.3035        | 966.5731       | 483.7902         | 965.5691       | 483.2982        | <b>967.5809</b>  | 484.2941          | 968.5887  | 484.7980          | 9  |    |
| 11 | 1345.7811 | 673.3942        | 1328.7546      | 664.8809         | 1327.7706      | <b>664.3889</b> | 1362.8077        | <b>681.9075</b> | G    |                  |           | 855.5411  | 428.2742        | 838.5145       | 419.7609         | 837.5305       | 419.2689        | <b>839.5223</b>  | 420.2648          | 840.5302  | 420.7687          | 8  |    |
| 12 | 1458.8652 | 729.9362        | 1441.8386      | 721.4230         | 1440.8546      | 720.9310        | 1475.8917        | <b>738.4495</b> | I    | 753.4618         | 767.4774  | 798.5196  | 399.7634        | 781.4931       | 391.2502         | 780.5090       | 390.7582        | <b>782.5009</b>  | 391.7541          | 783.5087  | 392.2580          | 7  |    |
| 13 | 1559.9129 | 780.4601        | 1542.8863      | 771.9468         | 1541.9023      | 771.4548        | 1576.9394        | <b>788.9733</b> | T    | 652.4141         | 654.3933  | 685.4355  | 343.2124        | 668.4090       | 334.7081         | 667.4250       | 334.2161        | <b>669.4168</b>  | 335.2120          | 670.4246  | 335.7160          | 6  |    |
| 14 | 1688.0078 | 844.5076        | 1670.9813      | <b>835.9943</b>  | 1669.9973      | <b>835.5023</b> | 1705.0344        | 853.0208        | K    | 510.3035         |           | 584.3879  | 292.6976        | 567.3613       | 284.1843         |                |                 | <b>568.3691</b>  | 284.6882          | 569.3770  | 285.1921          | 5  |    |
| 15 | 1785.0606 | 893.0339        | 1768.0340      | 884.5207         | 1767.0500      | 884.0287        | 1802.0871        | <b>901.5472</b> | P    | 413.2507         |           | 456.2929  | 228.6501        | 439.2663       | 220.1368         |                |                 | 440.2742         | 220.6407          | 441.2820  | 221.1446          | 4  |    |
| 16 | 1856.0977 | 928.5525        | 1839.0712      | 920.0392         | 1838.0871      | 919.5472        | 1873.1243        | <b>937.0658</b> | A    |                  | 359.2401  | 180.1237  | 342.2136        | 171.6104       |                  |                |                 | 343.2214         | 172.1143          | 344.2292  | 172.6183          | 3  |    |
| 17 | 1969.1818 | 985.0945        | 1952.1552      | 976.5813         | 1951.1712      | 976.0892        | 1986.2083        | <b>993.6078</b> | I    | 243.1452         | 257.1608  | 288.2030  | 144.6651        | 271.1765       | 136.9919         |                |                 | <b>272.1843</b>  | 136.5958          | 273.1921  | 137.0997          | 2  |    |
| 18 |           |                 |                |                  |                |                 |                  |                 | R    | 73.0284          |           | 175.1190  | 88.0631         | 158.0924       | 79.5498          |                |                 | 159.1002         | 80.0538           | 160.1081  | 80.5577           | 1  |    |

Monoisotopic mass of neutral peptide Mr(calc): 2142.2861

Fixed modifications: Carbamidomethyl (C) (apply to specified residues or termini only)

Variable modifications:

K3 : Dimethyl\_KR (KR)

Ions Score: 71 Expect: 0.00016

Matches : 47/301 fragment ions using 46 most intense peaks ([help](#))

# Mascot Search Results: Peptide View

HRKme2VLRDNIQGITKPAIR

MS/MS Fragmentation of **HRKme1VLRDNIQGITKPAIR**

Found in **sp|P62806|H4\_MOUSE** in **fgcz\_10090**, Histone H4 OS=Mus musculus GN=Hist1h4a

Match to Query 4484: 2128.270536 from(533.074910,4+) intensity(15082.3940) scans(3179) rtinseconds(2214.3129) index(1492)

Title: 1348: Scan 3179 (rt=36.9052) [s:\p749\Proteomics\ORBI\_2\andreamizzi\_20110310\_sperm\_trypsin\_chymo\_AspN\_ETD\_CID\20110311\_37\_NaCl\_trypsin\_SCX\_3.RAW]

Data file Y:\p749\Proteomics\Mascot\mgf50\_20110426\_sperm\_rerun\_trypsin\_2nd\_ETD\_run\_NaCl\_SCX\mascot\_daemon\_merge.mgf

Click mouse within plot area to zoom in by factor of two about that point

Or,   to  Da

Label all possible matches  Label matches used for scoring

Show Y-axis

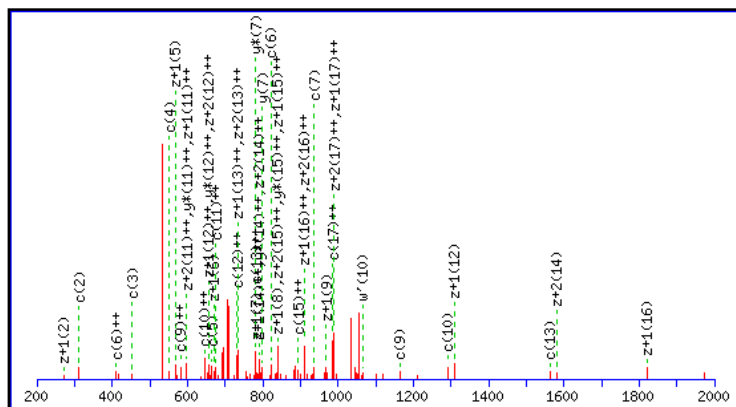

**Monoisotopic mass of neutral peptide Mr(calc):** 2128.2705

**Fixed modifications:** Carbamidomethyl (C) (apply to specified residues or termini only)

**Variable modifications:**

K3 : Methyl\_KR (KR)

**Ions Score:** 58 **Expect:** 0.00025

**Matches :** 47/301 fragment ions using 53 most intense peaks ([help](#))

| #  | b         | b <sup>++</sup> | b <sup>+</sup> | b <sup>+++</sup> | b <sup>0</sup> | b <sup>0++</sup> | c                | c <sup>+</sup>  | Seq. | w         | w'               | y               | y <sup>++</sup> | y <sup>+</sup>  | y <sup>+++</sup> | y <sup>0</sup> | y <sup>0++</sup> | z+1              | z+1 <sup>++</sup> | z+2       | z+2 <sup>++</sup> |    |
|----|-----------|-----------------|----------------|------------------|----------------|------------------|------------------|-----------------|------|-----------|------------------|-----------------|-----------------|-----------------|------------------|----------------|------------------|------------------|-------------------|-----------|-------------------|----|
| 1  | 138.0662  | 69.5367         |                |                  |                |                  | 155.0927         | 78.0500         | H    |           |                  |                 |                 |                 |                  |                |                  |                  |                   |           |                   | 18 |
| 2  | 294.1673  | 147.5873        | 277.1408       | 139.0740         |                |                  | <b>311.1938</b>  | 156.1006        | R    | 1890.1283 |                  | 1992.2189       | 996.6131        | 1975.1923       | 988.0998         | 1974.2083      | 987.6078         | 1976.2002        | <b>988.6037</b>   | 1977.2080 | <b>989.1076</b>   | 17 |
| 3  | 436.2779  | 218.6426        | 419.2514       | 210.1293         |                |                  | <b>453.3045</b>  | 227.1559        | K    | 1748.0177 |                  | 1836.1178       | 1918.5625       | 1819.0912       | 910.0493         | 1818.1072      | 909.5572         | <b>1820.0991</b> | <b>910.5532</b>   | 1821.1069 | <b>911.0571</b>   | 16 |
| 4  | 535.3463  | 268.1768        | 518.3198       | 259.6635         |                |                  | <b>552.3729</b>  | 276.6901        | V    | 1662.9650 |                  | 1694.0072       | 847.5072        | 1676.9806       | <b>838.9539</b>  | 1675.9966      | 838.5019         | 1677.9884        | <b>839.4979</b>   | 1678.9963 | <b>840.0018</b>   | 15 |
| 5  | 648.4304  | 324.7188        | 631.4038       | 316.2056         |                |                  | <b>665.4569</b>  | 333.2321        | L    | 1535.8653 |                  | 1594.9388       | 797.9730        | 1577.9122       | <b>789.4597</b>  | 1576.9282      | 788.9677         | 1578.9200        | <b>789.9637</b>   | 1579.9279 | <b>790.4676</b>   | 14 |
| 6  | 804.5315  | 402.7694        | 787.5050       | 394.2561         |                |                  | <b>821.5581</b>  | <b>411.2827</b> | R    | 1379.7641 |                  | 1481.8547       | 741.4310        | 1464.8281       | 732.9177         | 1463.8441      | 732.4257         | 1465.8360        | <b>733.4216</b>   | 1466.8438 | <b>733.9255</b>   | 13 |
| 7  | 919.5584  | 460.2829        | 902.5319       | 451.7696         | 901.5479       | 451.2776         | <b>936.5850</b>  | 468.7961        | D    | 1264.7372 |                  | 1325.7536       | 663.3804        | 1308.7270       | <b>654.8672</b>  | 1307.7430      | 654.3751         | <b>1309.7349</b> | <b>655.3711</b>   | 1310.7427 | <b>655.8750</b>   | 12 |
| 8  | 1033.6014 | 517.3043        | 1016.5748      | 508.7910         | 1015.5908      | 508.2990         | 1050.6279        | 525.8176        | N    | 1150.6943 |                  | 1210.7266       | 605.8670        | 1193.7001       | <b>597.3537</b>  | 1192.7161      | 596.8617         | 1194.7079        | <b>597.8576</b>   | 1195.7157 | <b>598.3615</b>   | 11 |
| 9  | 1146.6854 | 573.8464        | 1129.6589      | 565.3331         | 1128.6749      | 564.8411         | <b>1163.7120</b> | <b>582.3596</b> | I    | 1051.6259 | <b>1065.6415</b> | 1096.6837       | 548.8455        | 1079.6572       | 540.3322         | 1078.6731      | 539.8402         | 1080.6650        | 540.8361          | 1081.6728 | 541.3400          | 10 |
| 10 | 1274.7440 | 637.8756        | 1257.7175      | 629.3624         | 1256.7334      | 628.8704         | <b>1291.7706</b> | <b>646.3889</b> | Q    | 909.5516  |                  | 983.5996        | 492.3035        | 966.5731        | 483.7902         | 965.5891       | 483.2982         | <b>967.5809</b>  | 484.2941          | 968.5887  | 484.7980          | 9  |
| 11 | 1331.7655 | 666.3864        | 1314.7389      | 657.8731         | 1313.7549      | 657.3811         | 1348.7920        | <b>674.8997</b> | G    |           |                  | 855.5411        | 428.2742        | 838.5145        | 419.7609         | 837.5305       | 419.2689         | <b>839.5223</b>  | 420.2648          | 840.5302  | 420.7687          | 8  |
| 12 | 1444.8495 | 722.9284        | 1427.8230      | 714.4151         | 1426.8390      | 713.9231         | 1461.8761        | <b>731.4417</b> | I    | 753.4618  | 767.4774         | <b>798.5196</b> | 399.7634        | <b>781.4931</b> | 391.2502         | 780.5090       | 390.7582         | <b>782.5009</b>  | 391.7541          | 783.5087  | 392.2580          | 7  |
| 13 | 1545.8972 | 773.4522        | 1528.8707      | 764.9390         | 1527.8867      | 764.4470         | <b>1562.9238</b> | <b>781.9655</b> | T    | 652.4141  | 654.3933         | 685.4355        | 343.2214        | 668.4090        | 334.7081         | 667.4250       | 334.2161         | <b>669.4168</b>  | 335.2120          | 670.4246  | 335.7160          | 6  |
| 14 | 1673.9922 | 837.4997        | 1656.9656      | 828.9865         | 1655.9816      | 828.4944         | 1691.0187        | 846.0130        | K    | 510.3035  |                  | 584.3879        | 292.6976        | 567.3613        | 284.1843         |                |                  | <b>568.3691</b>  | 284.6882          | 569.3770  | 285.1921          | 5  |
| 15 | 1771.0449 | 886.0261        | 1754.0184      | 877.5128         | 1753.0344      | 877.0208         | 1788.0715        | <b>894.5394</b> | P    | 413.2507  |                  | 456.2929        | 228.6501        | 439.2663        | 220.1368         |                |                  | 440.2742         | 220.6407          | 441.2820  | 221.1446          | 4  |
| 16 | 1842.0821 | 921.5447        | 1825.0555      | 913.0314         | 1824.0715      | 912.5394         | 1859.1086        | 930.0579        | A    |           |                  | 359.2401        | 180.1237        | 342.2136        | 171.6104         |                |                  | 343.2214         | 172.1143          | 344.2292  | 172.6183          | 3  |
| 17 | 1955.1661 | 978.0867        | 1938.1396      | 969.5734         | 1937.1556      | 969.0814         | 1972.1927        | <b>986.6000</b> | I    | 243.1452  | 257.1608         | 288.2030        | 144.6051        | 271.1765        | 136.0919         |                |                  | <b>272.1843</b>  | 136.5958          | 273.1921  | 137.0997          | 2  |
| 18 |           |                 |                |                  |                |                  |                  |                 | R    | 73.0284   |                  | 175.1190        | 88.0631         | 158.0924        | 79.5498          |                |                  | 159.1002         | 80.0538           | 160.1081  | 80.5577           | 1  |

# Mascot Search Results: Peptide View

HRKme1VLRDNIQGITKPAIR

MS/MS Fragmentation of **HRKVLRDNIQGITKPAIRR**

Found in **sp|P62806|H4\_MOUSE** in **fgcz\_10090**, Histone H4 OS=Mus musculus GN=Hist1h4a

Match to Query 3344: 2298.382570 from(460.683790,5+) intensity(12884.6850) scans(3807) rtinseconds(2306.6157) index(2337)

Title: 2338: Scan 3807 (rt=38.4436) [s:hp749\Proteomics\ORBI\_2\andreamizzi\_20110517\_sperm\_trypsin\_GluC\_ETD\_CID\20110517\_05\_swimup\_NaCl\_1.RAW]

Data file 20110517\_05\_swimup\_NaCl\_1.mgf

Click mouse within plot area to zoom in by factor of two about that point

Or, Plot from  to  Da

Label all possible matches:  Label matches used for scoring:

Show Y-axis

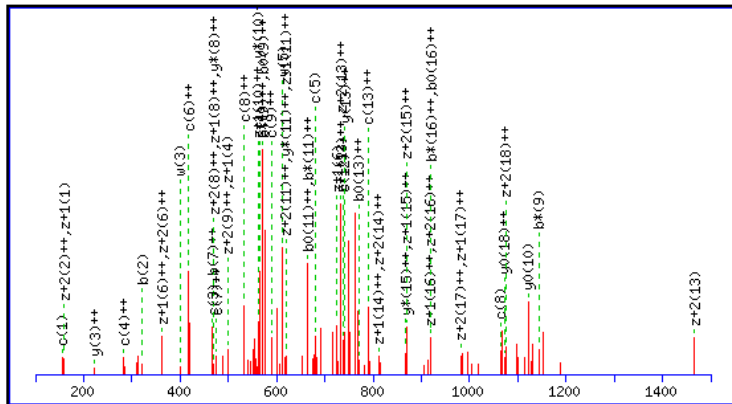

| #  | b         | b <sup>++</sup> | b <sup>+</sup> | b <sup>+++</sup> | b <sup>0</sup> | b <sup>0++</sup> | c         | c <sup>++</sup> | Seq. | w         | w'        | y         | y <sup>++</sup> | y <sup>+</sup> | y <sup>+++</sup> | y <sup>0</sup> | y <sup>0++</sup> | z+1       | z+1 <sup>++</sup> | z+2       | z+2 <sup>++</sup> | #  |    |
|----|-----------|-----------------|----------------|------------------|----------------|------------------|-----------|-----------------|------|-----------|-----------|-----------|-----------------|----------------|------------------|----------------|------------------|-----------|-------------------|-----------|-------------------|----|----|
| 1  | 138.0662  | 69.5367         |                |                  |                |                  | 155.0927  | 78.0500         | H    |           |           |           |                 |                |                  |                |                  |           |                   |           |                   |    | 19 |
| 2  | 322.1986  | 161.6029        | 305.1721       | 153.0897         |                |                  | 339.2251  | 170.1162        | R    | 2032.3138 |           | 2162.3356 | 1081.6715       | 2145.3091      | 1073.1582        | 2144.3251      | 1072.6662        | 2146.3169 | 1073.6621         | 2147.3248 | 1074.1660         | 18 |    |
| 3  | 450.2936  | 225.6504        | 433.2670       | 217.1371         |                |                  | 467.3201  | 234.1637        | K    | 1904.1188 |           | 1978.2032 | 989.6053        | 1961.1767      | 981.0920         | 1960.1927      | 980.6000         | 1962.1845 | 981.5959          | 1963.1923 | 982.0998          | 17 |    |
| 4  | 549.3620  | 275.1846        | 532.3354       | 266.6714         |                |                  | 566.3885  | 283.6979        | V    | 1819.0661 |           | 1850.1083 | 925.5578        | 1833.0817      | 917.0445         | 1832.0977      | 916.5525         | 1834.0896 | 915.5484          | 1835.0974 | 916.0523          | 16 |    |
| 5  | 662.4460  | 331.7267        | 645.4195       | 323.2134         |                |                  | 679.4726  | 340.2399        | L    | 1691.9664 |           | 1751.0399 | 876.0236        | 1734.0133      | 867.5103         | 1733.0293      | 867.0183         | 1735.0211 | 868.0142          | 1736.0290 | 868.5181          | 15 |    |
| 6  | 818.5472  | 409.7772        | 801.5206       | 401.2639         |                |                  | 835.5737  | 418.2905        | R    | 1535.8653 |           | 1637.9558 | 819.4815        | 1620.9292      | 810.9683         | 1619.9452      | 810.4763         | 1621.9371 | 811.4722          | 1622.9449 | 811.9761          | 14 |    |
| 7  | 933.5741  | 467.2907        | 916.5475       | 458.7774         | 915.5635       | 458.2854         | 950.6006  | 475.8040        | D    | 1420.8383 |           | 1481.8547 | 741.4310        | 1464.8281      | 732.9177         | 1463.8441      | 732.4257         | 1465.8360 | 733.4216          | 1466.8438 | 733.9255          | 13 |    |
| 8  | 1047.6170 | 524.3121        | 1030.5905      | 515.7989         | 1029.6065      | 515.3069         | 1064.6436 | 532.8254        | N    | 1306.7954 |           | 1366.8277 | 683.9175        | 1349.8012      | 675.4042         | 1348.8172      | 674.9122         | 1350.8060 | 675.9081          | 1351.8168 | 676.4121          | 12 |    |
| 9  | 1160.7011 | 580.8542        | 1143.6745      | 572.3409         | 1142.6905      | 571.8489         | 1177.7276 | 589.3675        | I    | 1207.7270 | 1221.7426 | 1252.7848 | 626.8960        | 1235.7583      | 618.3828         | 1234.7743      | 617.8908         | 1236.7661 | 618.8867          | 1237.7739 | 619.3906          | 11 |    |
| 10 | 1288.7597 | 644.8833        | 1271.7331      | 636.3702         | 1270.7491      | 635.8782         | 1305.7862 | 653.3967        | Q    | 1065.6527 |           | 1139.7008 | 570.3540        | 1122.6742      | 561.8407         | 1121.6902      | 561.3487         | 1123.6820 | 562.3447          | 1124.6899 | 562.8486          | 10 |    |
| 11 | 1345.7811 | 673.3942        | 1328.7546      | 664.8809         | 1327.7706      | 664.3889         | 1362.8077 | 681.9075        | G    |           |           | 1011.6422 | 506.3247        | 994.6156       | 497.8115         | 993.6316       | 497.3194         | 995.6235  | 498.1354          | 996.6313  | 498.1193          | 9  |    |
| 12 | 1458.8652 | 729.9362        | 1441.8386      | 721.4230         | 1440.8546      | 720.9310         | 1475.8917 | 738.4495        | I    | 909.5629  | 923.5785  | 954.6207  | 477.8140        | 937.5942       | 469.3007         | 936.6101       | 468.8087         | 938.6200  | 469.8046          | 939.6098  | 470.3085          | 8  |    |
| 13 | 1559.9129 | 780.4601        | 1542.8863      | 771.9468         | 1541.9023      | 771.4548         | 1576.9394 | 788.9733        | T    | 808.5152  | 810.4944  | 841.5366  | 421.2720        | 824.5101       | 412.7587         | 823.5261       | 412.2667         | 825.5179  | 413.2626          | 826.5257  | 413.7665          | 7  |    |
| 14 | 1688.0078 | 844.5076        | 1670.9813      | 835.9943         | 1669.9973      | 835.5023         | 1705.0344 | 853.0208        | K    | 666.4046  |           | 740.4890  | 370.7481        | 723.4624       | 362.2348         |                |                  | 724.4702  | 362.7388          | 725.4781  | 363.2427          | 6  |    |
| 15 | 1785.0066 | 893.0339        | 1768.0340      | 884.5207         | 1767.0500      | 884.0287         | 1802.0871 | 901.5472        | P    | 569.3518  |           | 612.3940  | 306.7006        | 595.3675       | 298.1874         |                |                  | 596.3753  | 298.6913          | 597.3831  | 299.1952          | 5  |    |
| 16 | 1856.0977 | 928.5525        | 1839.0712      | 920.0392         | 1838.0871      | 919.5472         | 1873.1243 | 937.0658        | A    |           |           | 515.3412  | 258.1743        | 498.3147       | 249.6610         |                |                  | 499.3225  | 250.1649          | 500.3303  | 250.6688          | 4  |    |
| 17 | 1969.1818 | 985.0945        | 1952.1552      | 976.5813         | 1951.1712      | 976.0892         | 1986.2083 | 993.6078        | I    | 399.2463  | 413.2619  | 444.3041  | 222.6557        | 427.2776       | 214.1424         |                |                  | 428.2854  | 214.6463          | 429.2932  | 215.1503          | 3  |    |
| 18 | 2125.2829 | 1063.1451       | 2108.2563      | 1054.6318        | 2107.2723      | 1054.1398        | 2142.3094 | 1071.6584       | R    | 229.1295  |           | 331.2201  | 166.1137        | 314.1935       | 157.6004         |                |                  | 315.2013  | 158.1043          | 316.2092  | 158.6002          | 2  |    |
| 19 |           |                 |                |                  |                |                  |           |                 | R    | 73.0284   |           | 175.1190  | 88.0631         | 158.0924       | 79.5498          |                |                  | 159.1002  | 80.0538           | 160.1081  | 80.5577           | 1  |    |

Monoisotopic mass of neutral peptide Mr(calc): 2298.3872

Fixed modifications: Carbamidomethyl (C) (apply to specified residues or termini only)

Variable modifications:

R2 : Dimethyl KR (KR)

Ions Score: 38 Expect: 0.0096

Matches : 56/318 fragment ions using 75 most intense peaks ([help](#))

# Mascot Search Results: Peptide View

HRme2KVLRLDNIQGITKPAIRR



MS/MS Fragmentation of **HRKVLRDNIQGITKPAIRR**  
 Found in **sp|P62806|H4\_MOUSE** in **fgez\_10090**, Histone H4 OS=Mus musculus GN=Hist1h4a

Match to Query 4895: 2312.401720 from(463.487620,5+) intensity(248928.0800) scans(2816) rtinseconds(2118.4265) index(4168)  
 Title: 1142: Scan 2816 (rt=35.3071) [s:\p749\Proteomics\ORBI\_2\andreamizzi\_20110310\_sperm\_trypsin\_chymo\_AspN\_ETD\_CID\20110311\_34\_NaCl\_trypsin\_SCX\_FT.RAW]  
 Data file Y:\p749\Proteomics\Mascot\mgf50\_20110426\_sperm\_rerun\_trypsin\_2nd\_ETD\_run\_NaCl\_SCX\mascot\_daemon\_merge.mgf

Click mouse within plot area to zoom in by factor of two about that point  
 Or, Plot from  to  Da   
 Label all possible matches  Label matches used for scoring   
 Show Y-axis

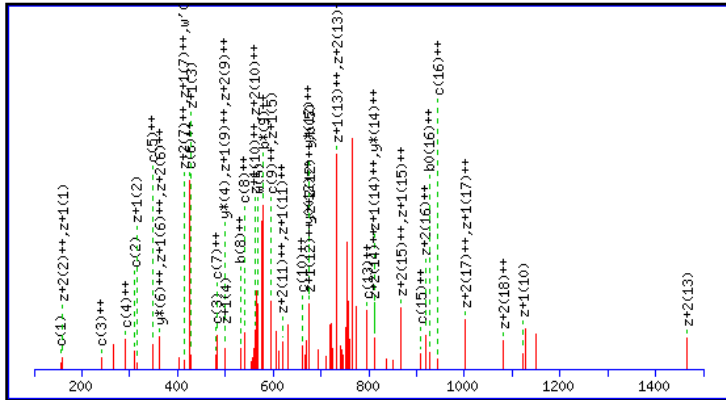

| #  | b         | b <sup>++</sup> | b <sup>+</sup> | b <sup>+++</sup> | b <sup>0</sup> | b <sup>0++</sup> | c         | c <sup>++</sup> | Seq. | w         | w'        | y         | y <sup>++</sup> | y <sup>+</sup> | y <sup>+++</sup> | y <sup>0</sup> | y <sup>0++</sup> | z+1       | z+1 <sup>++</sup> | z+2       | z+2 <sup>++</sup> | #  |    |
|----|-----------|-----------------|----------------|------------------|----------------|------------------|-----------|-----------------|------|-----------|-----------|-----------|-----------------|----------------|------------------|----------------|------------------|-----------|-------------------|-----------|-------------------|----|----|
| 1  | 138.0662  | 69.5367         |                |                  |                |                  | 155.0927  | 78.0500         | H    |           |           |           |                 |                |                  |                |                  |           |                   |           |                   |    | 19 |
| 2  | 294.1673  | 147.5873        | 277.1408       | 139.0740         |                |                  | 311.1938  | 156.1006        | R    | 2074.2608 |           | 2176.3513 | 1088.6793       | 2159.3248      | 1080.1660        | 2158.3407      | 1079.6740        | 2160.3326 | 1080.6699         | 2161.3404 | 1081.1738         | 18 |    |
| 3  | 464.3092  | 232.6582        | 447.2827       | 224.1430         |                |                  | 481.3358  | 241.1715        | K    | 1904.1188 |           | 2020.2502 | 1010.6287       | 2003.2236      | 1002.1155        | 2002.2396      | 1001.6234        | 2004.2315 | 1002.6194         | 2005.2393 | 1003.1233         | 17 |    |
| 4  | 563.3776  | 282.1925        | 546.3511       | 273.6792         |                |                  | 580.4042  | 290.7057        | V    | 1819.0661 |           | 1850.1083 | 925.5578        | 1833.0817      | 917.0445         | 1832.0977      | 916.5525         | 1834.0896 | 917.5484          | 1835.0974 | 918.0523          | 16 |    |
| 5  | 676.4617  | 338.7345        | 659.4351       | 330.2212         |                |                  | 693.4882  | 347.2478        | L    | 1691.9664 |           | 1751.0399 | 876.0236        | 1734.0133      | 867.5103         | 1733.0293      | 867.0183         | 1735.0211 | 868.0142          | 1736.0290 | 868.5181          | 15 |    |
| 6  | 832.5628  | 416.7850        | 815.5363       | 408.2718         |                |                  | 849.5894  | 425.2983        | R    | 1535.8653 |           | 1637.9558 | 819.4815        | 1620.9292      | 810.9683         | 1619.9452      | 810.4763         | 1621.9371 | 811.4722          | 1622.9449 | 811.9761          | 14 |    |
| 7  | 947.5897  | 474.2985        | 930.5632       | 465.7852         | 929.5792       | 465.2932         | 964.6163  | 482.8118        | D    | 1420.8383 |           | 1481.8547 | 741.4310        | 1464.8281      | 732.9177         | 1463.8441      | 732.4257         | 1465.8360 | 733.4216          | 1466.8438 | 733.9255          | 13 |    |
| 8  | 1061.6327 | 531.3200        | 1044.6061      | 522.8067         | 1043.6221      | 522.3147         | 1078.6592 | 539.8332        | N    | 1306.7954 |           | 1366.8277 | 683.9175        | 1349.8012      | 675.4042         | 1348.8172      | 674.9122         | 1350.8090 | 675.9081          | 1351.8168 | 676.4121          | 12 |    |
| 9  | 1174.7167 | 587.8620        | 1157.6902      | 579.3487         | 1156.7062      | 578.8567         | 1191.7433 | 596.3753        | I    | 1207.7270 | 1221.7426 | 1252.7848 | 626.8960        | 1235.7583      | 618.3828         | 1234.7743      | 617.8908         | 1236.7661 | 618.8867          | 1237.7339 | 619.3906          | 11 |    |
| 10 | 1302.7753 | 651.8913        | 1285.7488      | 643.3780         | 1284.7647      | 642.8880         | 1319.8019 | 660.4046        | Q    | 1065.6527 |           | 1139.7008 | 570.3540        | 1122.6742      | 561.8407         | 1121.6902      | 561.3487         | 1123.6820 | 562.3447          | 1124.6899 | 562.8486          | 10 |    |
| 11 | 1359.7968 | 680.4020        | 1342.7702      | 671.8888         | 1341.7862      | 671.3967         | 1376.8233 | 688.9153        | G    |           |           | 1011.6422 | 506.3247        | 994.6156       | 497.8115         | 993.6136       | 497.3194         | 995.6235  | 498.3154          | 996.6313  | 498.8193          | 9  |    |
| 12 | 1472.8808 | 736.9441        | 1455.8543      | 728.4308         | 1454.8703      | 727.9388         | 1489.9074 | 745.4573        | I    | 909.5629  | 923.5785  | 954.6207  | 477.8140        | 937.5942       | 469.3007         | 936.6101       | 468.8087         | 938.6020  | 469.8046          | 939.6098  | 470.3085          | 8  |    |
| 13 | 1573.9285 | 787.4679        | 1556.9020      | 778.9546         | 1555.9180      | 778.4626         | 1590.9551 | 795.9812        | T    | 808.5152  | 810.4944  | 841.3366  | 421.2720        | 824.5101       | 412.7587         | 823.5261       | 412.2667         | 825.5179  | 413.2626          | 826.5257  | 413.7665          | 7  |    |
| 14 | 1702.0235 | 851.5154        | 1684.9969      | 843.0021         | 1684.0129      | 842.5101         | 1719.0500 | 860.0287        | K    | 666.4046  |           | 740.4890  | 370.7481        | 723.4624       | 362.2348         |                |                  | 724.4702  | 362.7388          | 725.4781  | 363.2427          | 6  |    |
| 15 | 1799.0262 | 900.0418        | 1782.0047      | 891.5285         | 1781.0657      | 891.0365         | 1816.1028 | 908.5550        | P    | 569.3518  |           | 612.3940  | 306.7006        | 595.3675       | 298.1674         |                |                  | 596.3753  | 298.6913          | 597.3831  | 299.1952          | 5  |    |
| 16 | 1870.1134 | 935.5603        | 1853.0868      | 927.0470         | 1852.1028      | 926.5550         | 1887.1399 | 944.0736        | A    |           |           | 615.3412  | 258.1743        | 498.3147       | 249.6010         |                |                  | 499.3225  | 250.1649          | 500.3303  | 250.6688          | 4  |    |
| 17 | 1983.1974 | 992.1024        | 1966.1709      | 983.5891         | 1965.1869      | 983.0971         | 2000.2240 | 1000.6156       | I    | 399.2463  | 413.2619  | 444.3041  | 222.6557        | 427.2776       | 214.1424         |                |                  | 428.2854  | 214.6463          | 429.2932  | 215.1503          | 3  |    |
| 18 | 2139.2985 | 1070.1529       | 2122.2720      | 1061.6396        | 2121.2880      | 1061.1476        | 2156.3251 | 1078.6662       | R    | 229.1295  |           | 331.2201  | 166.1137        | 314.1935       | 157.6004         |                |                  | 315.2013  | 158.1043          | 318.2092  | 158.6082          | 2  |    |
| 19 |           |                 |                |                  |                |                  |           |                 | R    | 73.0284   |           | 175.1190  | 88.0631         | 158.0924       | 79.5498          |                |                  | 159.1002  | 80.0538           | 160.1081  | 80.5577           | 1  |    |

**Monoisotopic mass of neutral peptide Mr(calc):** 2312.4029  
**Fixed modifications:** Carbamidomethyl (C) (apply to specified residues or termini only)  
**Variable modifications:**  
 K3 : Trimethyl (K)  
**Ions Score:** 75 **Expect:** 3.9e-05  
**Matches :** 55/318 fragment ions using 63 most intense peaks ([help](#))

# Mascot Search Results: Peptide View

HRKme3VLRDNIQGITKPAIRR

MS/MS Fragmentation of **HRKVLDRNQITKPAIRR**

Found in **sp|P62806|H4\_MOUSE** in **fgcz\_10090**, Histone H4 OS=Mus musculus GN=Hist1h4a

Match to Query 3669: 2298.376720 from(460.682620,5+) intensity(315840.6300) scans(3829) rtseconds(2173.965) index(2452)

Title: 2453: Scan 3829 (rt=36.2328) [s:\p749\Proteomics\ORBI\_2\andreamizi\_20110517\_sperm\_trypsin\_GluC\_ETD\_CID\20110517\_01\_NaCl\_1.RAW]

Data file 20110517\_01\_NaCl\_1.mgf

Click mouse within plot area to zoom in by factor of two about that point

Or, Plot from  to  Da

Label all possible matches  Label matches used for scoring

Show Y-axis

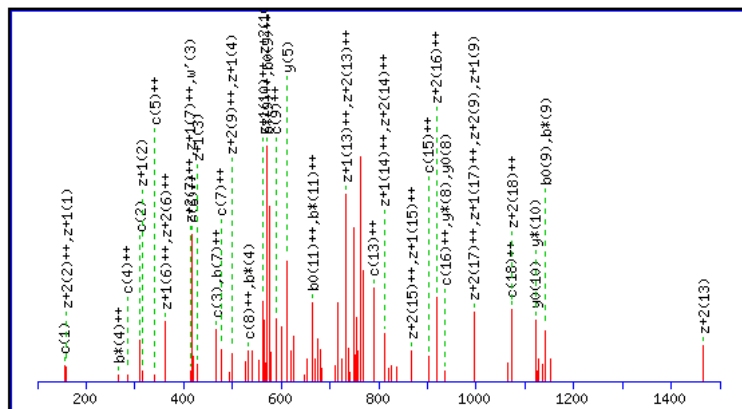

| #  | b         | b <sup>++</sup> | b <sup>*</sup>   | b <sup>+++</sup> | b <sup>0</sup>   | b <sup>0++</sup> | c               | c <sup>++</sup>  | Seq.            | w         | w'              | y               | y <sup>++</sup> | y <sup>*</sup>   | y <sup>+++</sup> | y <sup>0</sup>   | y <sup>0++</sup> | z+1             | z+1 <sup>++</sup> | z+2              | z+2 <sup>++</sup> | #         |    |
|----|-----------|-----------------|------------------|------------------|------------------|------------------|-----------------|------------------|-----------------|-----------|-----------------|-----------------|-----------------|------------------|------------------|------------------|------------------|-----------------|-------------------|------------------|-------------------|-----------|----|
| 1  | 138.0662  | 69.5367         |                  |                  |                  |                  | <b>155.0927</b> | 78.0500          | R               |           |                 |                 |                 |                  |                  |                  |                  |                 |                   |                  |                   |           | 19 |
| 2  | 294.1673  | 147.5873        | 277.1408         | 139.0740         |                  |                  | <b>311.1938</b> | 156.1006         | R               | 2060.2451 |                 | 2162.3356       | 1081.6715       | 2145.3091        | 1073.1582        | 2144.3251        | 1072.6662        | 2146.3169       | 1073.6621         | 2147.3248        | <b>1074.1660</b>  | <b>17</b> |    |
| 3  | 450.2936  | 225.6504        | 433.2670         | 217.1371         |                  |                  | <b>467.3201</b> | 234.1637         | K               | 1904.1188 |                 | 2006.2345       | 1003.6209       | 1989.2080        | 995.1076         | 1988.2240        | 994.6156         | 1990.2158       | <b>995.6115</b>   | 1991.2236        | <b>996.1155</b>   | <b>18</b> |    |
| 4  | 549.3620  | 275.1846        | <b>532.3334</b>  | <b>266.6714</b>  |                  |                  |                 | 566.3885         | <b>283.6979</b> | V         | 1819.0661       | 1850.1081       | 925.5578        | 1833.0817        | 917.0445         | 1832.0977        | 916.5525         | 1834.0896       | 917.5484          | 1835.0974        | <b>918.0523</b>   | <b>16</b> |    |
| 5  | 662.4460  | 331.7267        | 645.4195         | 323.2134         |                  |                  | 679.4726        | <b>340.2399</b>  | L               | 1691.9664 |                 | 1751.0399       | 876.0236        | 1734.0133        | 867.5103         | 1733.0293        | 867.0183         | 1735.0211       | <b>868.0142</b>   | 1736.0290        | <b>868.5181</b>   | <b>15</b> |    |
| 6  | 818.5472  | 409.7772        | 801.5206         | 401.2639         |                  |                  | 835.5737        | <b>418.2905</b>  | R               | 1535.8653 |                 | 1637.9558       | 819.4815        | 1620.9292        | 810.9683         | 1619.9452        | 810.4763         | 1621.9371       | <b>811.4722</b>   | 1622.9449        | <b>811.9761</b>   | <b>14</b> |    |
| 7  | 933.5741  | <b>467.2907</b> | 916.5475         | 458.7774         | 915.5635         | 458.2854         | 950.6006        | <b>475.8040</b>  | D               | 1420.8383 |                 | 1481.8547       | 741.4310        | 1464.8281        | 732.9177         | 1463.8441        | 732.4257         | 1465.8360       | <b>733.4216</b>   | <b>1466.0438</b> | <b>733.9255</b>   | <b>13</b> |    |
| 8  | 1047.6170 | 524.3121        | 1030.5905        | 515.7989         | 515.7989         | 1029.6065        | 515.3069        | 1064.6436        | <b>532.8254</b> | N         | 1306.7954       | 1366.8277       | 683.9175        | 1349.8012        | 675.4042         | 1348.8172        | 674.9122         | 1350.8090       | 675.9081          | 1351.8168        | 676.4121          | <b>12</b> |    |
| 9  | 1160.7011 | 580.8542        | <b>1143.6745</b> | <b>572.3409</b>  | <b>1142.6905</b> | <b>571.8489</b>  | 1177.7276       | <b>589.3675</b>  | I               | 1207.7270 | 1221.7426       | 1252.7848       | 626.8960        | 1235.7583        | 618.3828         | 1234.7743        | 617.8908         | 1236.7661       | 618.8867          | 1237.7739        | 619.3906          | <b>11</b> |    |
| 10 | 1288.7597 | 644.8835        | 1271.7331        | 636.3702         | 1270.7491        | 635.8782         | 1305.7862       | 653.3967         | Q               | 1065.6527 |                 | 1139.7008       | 570.3540        | <b>1122.6742</b> | 561.8407         | <b>1121.6902</b> | 561.3487         | 1123.6820       | <b>562.3447</b>   | 1124.6899        | <b>562.8486</b>   | <b>10</b> |    |
| 11 | 1345.7811 | 673.3942        | 1328.7546        | <b>664.8809</b>  | 1327.7706        | <b>664.3889</b>  | 1362.8077       | 681.9075         | G               |           |                 | 1011.6422       | 506.3247        | 994.6156         | 497.8115         | 993.6316         | 497.3194         | <b>995.6235</b> | 498.3154          | <b>996.6313</b>  | <b>498.8193</b>   | <b>9</b>  |    |
| 12 | 1458.8652 | 729.9362        | 1441.8386        | 721.4230         | 1440.8546        | 720.9310         | 1475.8917       | 738.4495         | I               | 909.5629  | 923.5785        | 954.6207        | 477.8140        | <b>917.5942</b>  | 469.3007         | <b>916.6101</b>  | 468.8087         | 938.6020        | 469.8046          | 939.6098         | 470.3085          | <b>8</b>  |    |
| 13 | 1559.9129 | 780.4601        | 1542.8863        | 771.9468         | 1541.9023        | 771.4548         | 1576.9394       | <b>788.9733</b>  | T               | 808.5152  | 810.4944        | 841.5366        | 421.2720        | 824.5101         | 412.7587         | 823.5261         | 412.2667         | 825.5179        | <b>413.2626</b>   | 826.5257         | <b>413.7665</b>   | <b>7</b>  |    |
| 14 | 1688.0078 | 844.5076        | 1670.9813        | 835.9943         | 1669.9973        | 835.5023         | 1705.0344       | 853.0208         | K               | 666.4046  |                 | 740.4890        | 370.7481        | 723.4624         | 362.2348         |                  |                  | 724.4702        | <b>362.7388</b>   | 725.4781         | <b>363.2427</b>   | <b>6</b>  |    |
| 15 | 1785.0606 | 893.0339        | 1768.0340        | 884.5207         | 1767.0500        | 884.0287         | 1802.0871       | <b>901.5472</b>  | P               | 569.3518  |                 | <b>612.3940</b> | 306.7006        | 595.3675         | 298.1874         |                  |                  | 596.3753        | 298.6913          | 597.3831         | 299.1952          | <b>5</b>  |    |
| 16 | 1856.0977 | 928.5255        | 1839.0712        | 920.0392         | 1838.0871        | 919.5472         | 1873.1243       | <b>937.0658</b>  | A               |           |                 | 515.3412        | 258.1743        | 498.3147         | 249.6610         |                  |                  | <b>499.3225</b> | 250.1649          | 500.3303         | 250.6688          | <b>4</b>  |    |
| 17 | 1969.1818 | 985.0945        | 1952.1552        | 976.5813         | 1951.1712        | 976.0892         | 1986.2083       | 993.6078         | T               | 399.2463  | <b>413.2619</b> | 444.3041        | 222.6557        | 427.2776         | 214.1424         |                  |                  | <b>428.2854</b> | 214.4463          | 429.2952         | 215.1503          | <b>3</b>  |    |
| 18 | 2125.2829 | 1063.1451       | 2108.2563        | 1054.6318        | 2107.2723        | 1054.1396        | 2142.3094       | <b>1071.6584</b> | R               | 229.1295  |                 | 331.2201        | 166.1137        | 314.1935         | 157.6004         |                  |                  | <b>315.2013</b> | 158.1043          | 316.2092         | <b>158.6082</b>   | <b>2</b>  |    |
| 19 |           |                 |                  |                  |                  |                  |                 |                  | R               | 73.0284   |                 | 175.1190        | 88.0631         | 158.0924         | 79.5498          |                  |                  | <b>159.1002</b> | 80.0538           | 160.1081         | 80.5577           | <b>1</b>  |    |

Monoisotopic mass of neutral peptide Mr(calc): 2298.3872

Fixed modifications: Carbamidomethyl (C) (apply to specified residues or termini only)

Variable modifications:

K3 : Dimethyl\_KR (KR)

Ions Score: 76 Expect: 5.5e-05

Matches : 53/318 fragment ions using 44 most intense peaks ([help](#))

# Mascot Search Results: Peptide View

HRKme2VLRDNIQGITKPAIRR

MS/MS Fragmentation of **KVLRDNIQGITKPAIR**

Found in **sp|P62806|H4\_MOUSE** in **fgcz\_10090**, Histone H4 OS=Mus musculus GN=Hist1h4a

Match to Query 2310: 1835.109856 from(459.784740,4+) intensity(620718.1300) scans(3597) rtinseconds(2041.9003) index(1995)

Title: 1996: Scan 3597 (rt=34.0317) [s:\p749\Proteomics\ORBI\_2\andreamizzi\_201110127\_sperm\_trypsin\_ETD\_CID\20110127\_08\_ON7\_saltex.RAW]

Data file W\fgcz-ms.uzh.ch\p749\Proteomics\ORBI\_2\andreamizzi\_20110127\_sperm\_trypsin\_ETD\_CID\mgf\_low\_res\_MS2\_nomerge\20110127\_08\_ON7\_saltex.mgf

Click mouse within plot area to zoom in by factor of two about that point

Or, Plot from  to  Da

Label all possible matches  Label matches used for scoring

Show Y-axis

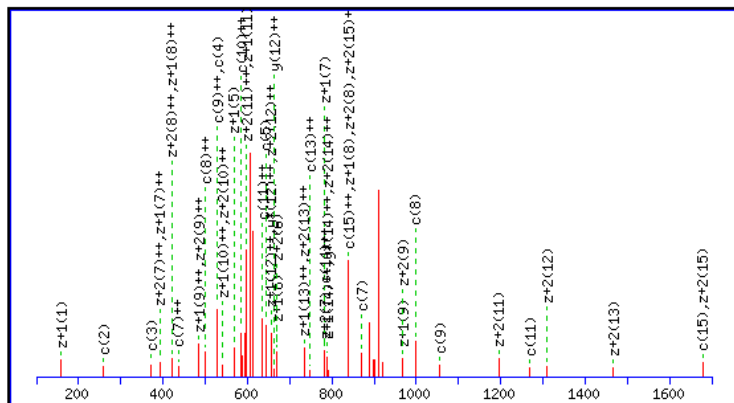

| #  | b         | b <sup>++</sup> | b <sup>+</sup> | b <sup>++</sup> | b <sup>0</sup> | b <sup>0++</sup> | c        | c <sup>++</sup> | Seq. | w         | w'        | y         | y <sup>++</sup> | y <sup>+</sup> | y <sup>++</sup> | y <sup>0</sup> | y <sup>0++</sup> | z+1       | z+1 <sup>++</sup> | z+2       | z+2 <sup>++</sup> | # |    |
|----|-----------|-----------------|----------------|-----------------|----------------|------------------|----------|-----------------|------|-----------|-----------|-----------|-----------------|----------------|-----------------|----------------|------------------|-----------|-------------------|-----------|-------------------|---|----|
| 1  | 143.1179  | 72.0626         | 126.0913       | 63.5493         |                |                  | 160.1444 | 80.5759         | K    |           |           |           |                 |                |                 |                |                  |           |                   |           |                   |   | 16 |
| 2  | 242.1863  | 121.5968        | 225.1598       | 113.0835        |                |                  | 259.2129 | 130.1101        | V    | 1662.9650 |           | 1694.0072 | 847.5072        | 1676.9806      | 838.9939        | 1675.9966      | 838.5019         | 1677.9884 | 839.4979          | 1678.9963 | 840.0018          |   | 15 |
| 3  | 355.2704  | 178.1388        | 338.2438       | 169.6255        |                |                  | 372.2969 | 186.6521        | L    | 1535.8653 |           | 1594.9388 | 797.9730        | 1577.9122      | 789.4597        | 1576.9282      | 788.9677         | 1578.9200 | 789.9637          | 1579.9279 | 790.4676          |   | 14 |
| 4  | 511.3715  | 256.1894        | 494.3449       | 247.6761        |                |                  | 528.3980 | 264.7027        | R    | 1379.7641 |           | 1481.8547 | 741.4310        | 1464.8281      | 732.9177        | 1463.8441      | 732.4257         | 1465.8360 | 733.4216          | 1466.8438 | 733.9255          |   | 13 |
| 5  | 626.3984  | 313.7028        | 609.3719       | 305.1896        |                | 608.3879         | 304.6976 | 643.4230        | D    | 1264.7372 |           | 1325.7536 | 663.3804        | 1308.7270      | 654.8672        | 1307.7430      | 654.3751         | 1309.7349 | 655.3711          | 1310.7427 | 655.8750          |   | 12 |
| 6  | 740.4413  | 370.7243        | 723.4148       | 362.2110        |                | 722.4308         | 361.7190 | 757.4679        | N    | 1150.6943 |           | 1210.7266 | 605.8670        | 1193.7001      | 597.3537        | 1192.7161      | 596.8617         | 1194.7079 | 597.8576          | 1195.7157 | 598.3615          |   | 11 |
| 7  | 853.5254  | 427.2663        | 836.4989       | 418.7531        |                | 835.5148         | 418.2611 | 870.5520        | I    | 1051.6259 | 1065.6415 | 1096.6837 | 548.8455        | 1079.6572      | 540.3322        | 1078.6731      | 539.8402         | 1080.6650 | 540.8361          | 1081.6728 | 541.3400          |   | 10 |
| 8  | 981.5840  | 491.2956        | 964.5574       | 482.7824        |                | 963.5734         | 482.2904 | 998.6105        | Q    | 909.5516  |           | 983.5996  | 492.3035        | 966.5731       | 483.7902        | 965.5891       | 483.2982         | 967.5809  | 484.2941          | 968.5887  | 484.7980          |   | 9  |
| 9  | 1038.6055 | 519.8064        | 1021.5789      | 511.2931        |                | 1020.5949        | 510.8011 | 1055.6320       | G    |           |           | 855.5411  | 428.2742        | 838.5145       | 419.7609        | 837.5305       | 419.2689         | 839.5223  | 420.2648          | 840.5302  | 420.7687          |   | 8  |
| 10 | 1151.6895 | 576.3484        | 1134.6630      | 567.8351        |                | 1133.6790        | 567.3431 | 1168.7161       | I    | 753.4618  | 767.4774  | 798.5196  | 399.7634        | 781.4931       | 391.2502        | 780.5090       | 390.7582         | 782.5009  | 391.7541          | 783.5087  | 392.2580          |   | 7  |
| 11 | 1252.7372 | 626.8722        | 1235.7106      | 618.3590        |                | 1234.7266        | 617.8670 | 1269.7637       | T    | 652.4141  | 654.3933  | 685.4355  | 343.2214        | 668.4090       | 334.7081        | 667.4230       | 334.2161         | 669.4168  | 335.2120          | 670.4246  | 335.7160          |   | 6  |
| 12 | 1380.8322 | 690.9197        | 1363.8056      | 682.4064        |                | 1362.8216        | 681.9144 | 1397.8587       | K    | 510.3035  |           | 584.3879  | 292.6976        | 567.3613       | 284.1843        |                |                  | 568.3691  | 284.6882          | 569.3770  | 285.1921          |   | 5  |
| 13 | 1477.8849 | 739.4461        | 1460.8584      | 730.9328        |                | 1459.8744        | 730.4408 | 1494.9115       | P    | 413.2507  |           | 456.2929  | 228.6501        | 439.2663       | 220.1368        |                |                  | 440.2742  | 220.6407          | 441.2820  | 221.1446          |   | 4  |
| 14 | 1548.9220 | 774.9647        | 1531.8955      | 766.4514        |                | 1530.9115        | 765.9594 | 1565.9486       | A    |           |           | 359.2401  | 180.1237        | 342.2136       | 171.6104        |                |                  | 343.2214  | 172.1143          | 344.2292  | 172.6183          |   | 3  |
| 15 | 1662.0061 | 831.5067        | 1644.9796      | 822.9934        |                | 1643.9955        | 822.5014 | 1679.0327       | I    | 243.1452  | 257.1608  | 288.2030  | 144.6051        | 271.1765       | 136.0919        |                |                  | 272.1843  | 136.5958          | 273.1921  | 137.0997          |   | 2  |
| 16 |           |                 |                |                 |                |                  |          |                 | R    | 73.0284   |           | 175.1190  | 88.0631         | 158.0924       | 79.5498         |                |                  | 159.1002  | 80.0538           | 160.1081  | 80.5577           |   | 1  |

Monoisotopic mass of neutral peptide Mr(calc): 1835.1105

Fixed modifications: Carbamidomethyl (C) (apply to specified residues or termini only)

Variable modifications:

K1 : Methyl\_KR (KR)

Ions Score: 84 Expect: 6.7e-06

Matches : 52/269 fragment ions using 46 most intense peaks ([help](#))

# Mascot Search Results: Peptide View

Kme1VLRDNIQGITKPAIR

MS/MS Fragmentation of **KVLRDNIQGITKPAIR**

Found in **sp|P62806|H4\_MOUSE** in **fgcz\_10090**, Histone H4 OS=Mus musculus GN=Hist1h4a

Match to Query 3895: 1863.141176 from(466.792570,4+) intensity(80800.3440) scans(3445) rtinseconds(2382.7402) index(1605)

Title: 1461: Scan 3445 (rt=39.7123) [s:\p749\Proteomics\ORBI\_2\andreamezzi\_20110310\_sperm\_trypsin\_chymo\_AspN\_ETD\_CID\20110311\_37\_NaCl\_trypsin\_SCX\_3.RAW]

Data file Y:\p749\Proteomics\Mascot\mrgf50\_20110426\_sperm\_rerun\_trypsin\_2nd\_ETD\_run\_NaCl\_SCX\mascot\_daemon\_merge.mgf

Click mouse within plot area to zoom in by factor of two about that point

Or, Plot from  to  Da

Label all possible matches  Label matches used for scoring

Show Y-axis

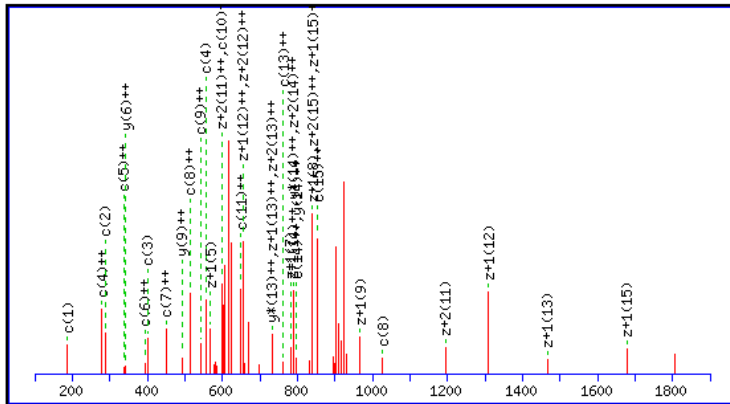

| #  | b         | b <sup>++</sup> | b <sup>*</sup> | b <sup>+++</sup> | b <sup>0</sup> | b <sup>0++</sup> | c         | c <sup>++</sup> | Seq. | w         | w <sup>*</sup> | y         | y <sup>++</sup> | y <sup>*</sup> | y <sup>+++</sup> | y <sup>0</sup> | y <sup>0++</sup> | z+1       | z+1 <sup>++</sup> | z+2       | z+2 <sup>++</sup> | #  |    |
|----|-----------|-----------------|----------------|------------------|----------------|------------------|-----------|-----------------|------|-----------|----------------|-----------|-----------------|----------------|------------------|----------------|------------------|-----------|-------------------|-----------|-------------------|----|----|
| 1  | 171.1492  | 86.0782         | 154.1226       | 77.5650          |                |                  | 188.1757  | 94.5915         | K    |           |                |           |                 |                |                  |                |                  |           |                   |           |                   |    | 16 |
| 2  | 270.2176  | 135.6124        | 253.1911       | 127.0992         |                |                  | 287.2442  | 144.1257        | V    | 1662.9650 |                | 1694.0072 | 847.5072        | 1676.9806      | 838.9939         | 1675.9966      | 838.5019         | 1677.9884 | 839.4979          | 1678.9963 | 840.0018          | 15 |    |
| 3  | 383.3017  | 192.1545        | 366.2751       | 183.6412         |                |                  | 400.3282  | 200.6677        | L    | 1535.8653 |                | 1594.9388 | 797.9730        | 1577.9122      | 789.4597         | 1576.9282      | 788.9677         | 1578.9200 | 789.9637          | 1579.9279 | 790.4676          | 14 |    |
| 4  | 539.4028  | 270.2090        | 522.3762       | 261.6918         |                |                  | 556.4293  | 278.7183        | R    | 1379.7641 |                | 1481.8547 | 741.4310        | 1464.8281      | 732.9177         | 1463.8441      | 732.4257         | 1465.8360 | 733.4216          | 1466.8438 | 733.9255          | 13 |    |
| 5  | 654.4297  | 327.7185        | 637.4032       | 319.2052         | 636.4192       | 318.7132         | 671.4563  | 336.2318        | D    | 1264.7372 |                | 1325.7536 | 663.3804        | 1308.7270      | 654.8672         | 1307.7430      | 654.3751         | 1309.7349 | 655.3711          | 1310.7427 | 655.8750          | 12 |    |
| 6  | 768.4726  | 384.7400        | 751.4461       | 376.2267         | 750.4621       | 375.7347         | 785.4992  | 393.2532        | N    | 1150.6943 |                | 1210.7266 | 605.8670        | 1193.7001      | 597.3537         | 1192.7161      | 596.8617         | 1194.7079 | 597.8576          | 1195.7157 | 598.3615          | 11 |    |
| 7  | 881.5567  | 441.2820        | 864.5302       | 432.7687         | 863.5461       | 432.2767         | 898.5833  | 449.7933        | I    | 1051.6259 | 1065.6415      | 1096.6837 | 548.8455        | 1079.6572      | 540.3322         | 1078.6731      | 539.8402         | 1080.6650 | 540.8361          | 1081.6728 | 541.3400          | 10 |    |
| 8  | 1009.6153 | 505.3113        | 992.5887       | 496.7980         | 991.6047       | 496.3060         | 1026.6418 | 513.8246        | Q    | 909.5516  |                | 983.5996  | 492.3035        | 966.5731       | 483.7902         | 965.5891       | 483.2982         | 967.5809  | 484.2941          | 968.5887  | 484.7980          | 9  |    |
| 9  | 1096.6368 | 533.8220        | 1049.6102      | 525.3087         | 1048.6262      | 524.8167         | 1083.6633 | 542.3353        | G    |           |                | 855.5411  | 428.2742        | 838.5145       | 419.7609         | 837.5305       | 419.2689         | 839.5223  | 420.2648          | 840.5302  | 420.7687          | 8  |    |
| 10 | 1179.7208 | 590.3640        | 1162.6943      | 581.8508         | 1161.7103      | 581.3588         | 1196.7474 | 598.8773        | I    | 753.4618  | 767.4774       | 798.5196  | 399.7634        | 781.4931       | 391.2502         | 780.5090       | 390.7582         | 782.5009  | 391.7541          | 783.5087  | 392.2580          | 7  |    |
| 11 | 1280.7685 | 640.8879        | 1263.7419      | 632.3746         | 1262.7579      | 631.8826         | 1297.7950 | 649.4012        | T    | 652.4141  | 654.3933       | 685.4355  | 343.2214        | 668.4090       | 334.7081         | 667.4250       | 334.2161         | 669.4168  | 335.2120          | 670.4246  | 335.7160          | 6  |    |
| 12 | 1408.8635 | 704.9354        | 1391.8369      | 696.4221         | 1390.8529      | 695.9301         | 1425.8900 | 713.4486        | K    | 510.3035  |                | 584.3879  | 292.6976        | 567.3613       | 284.1843         |                |                  | 568.3691  | 284.6882          | 569.3770  | 285.1921          | 5  |    |
| 13 | 1505.9162 | 753.4618        | 1488.8897      | 744.9485         | 1487.9057      | 744.4565         | 1522.9428 | 761.9750        | P    | 413.2507  |                | 456.2929  | 228.6501        | 439.2663       | 220.1368         |                |                  | 440.2742  | 220.6407          | 441.2820  | 221.1446          | 4  |    |
| 14 | 1576.9533 | 788.9803        | 1559.9268      | 780.4670         | 1558.9428      | 779.9750         | 1593.9799 | 797.4936        | A    |           |                | 359.2401  | 180.1237        | 342.2136       | 171.6104         |                |                  | 343.2214  | 172.1143          | 344.2292  | 172.6183          | 3  |    |
| 15 | 1690.0374 | 845.5223        | 1673.0109      | 837.0091         | 1672.0268      | 836.5171         | 1707.0640 | 854.0356        | R    | 243.1452  | 257.1608       | 288.2030  | 144.6051        | 271.1765       | 136.0919         |                |                  | 272.1843  | 136.5958          | 273.1921  | 137.0997          | 2  |    |
| 16 |           |                 |                |                  |                |                  |           |                 |      | 73.0284   |                | 175.1190  | 88.0631         | 158.0924       | 79.5498          |                |                  | 159.1002  | 80.0538           | 160.1081  | 80.5577           | 1  |    |

Monoisotopic mass of neutral peptide Mr(calc): 1863.1418

Fixed modifications: Carbamidomethyl (C) (apply to specified residues or termini only)

Variable modifications:

K1 : Trimethyl (K)

Ions Score: 84 Expect: 5.4e-06

Matches : 39/269 fragment ions using 44 most intense peaks ([help](#))

# Mascot Search Results: Peptide View

Kme3VLRDNIQGITKPAIR

MS/MS Fragmentation of **KVLRDNIQGITKPAIR**

Found in **sp|P62806|H4\_MOUSE** in **fgcz\_10090**, Histone H4 OS=Mus musculus GN=Hist1h4a

Match to Query 2466: 1863.139336 from(466.792110,4+) intensity(1156701.1000) scans(3847) rtinseconds(2260.0869) index(2233)

Title: 2234: Scan 3847 (rt=37.6681) [s:\p749\Proteomics\ORBI\_2\andreamizzi\_20110310\_sperm\_trypsin\_chymo\_AspN\_ETD\_CID\20110310\_05\_rep\_ON7.RAW]

Data file \\fgcz-ms.uzh.ch\p749\Proteomics\ORBI\_2\andreamizzi\_20110310\_sperm\_trypsin\_chymo\_AspN\_ETD\_CID\mgf\_low\_res\_MS2\_nomerge\20110310\_05\_rep\_ON7.mgf

Click mouse within plot area to zoom in by factor of two about that point

Or, Plot from  to  Da

Label all possible matches  Label matches used for scoring

Show Y-axis

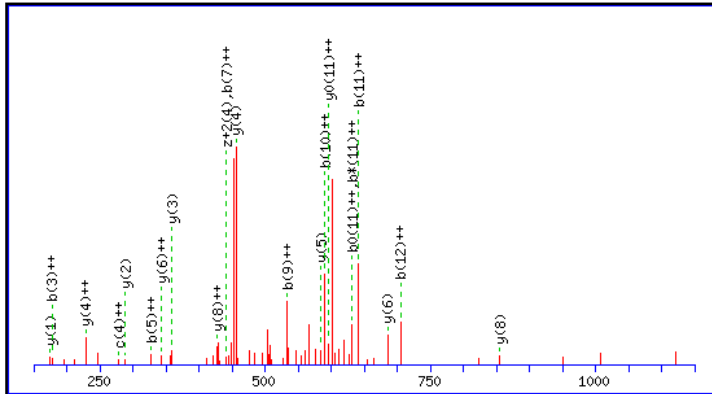

| #  | b         | b <sup>++</sup> | b <sup>+</sup> | b <sup>+++</sup> | b <sup>0</sup> | b <sup>0++</sup> | c         | c <sup>++</sup> | Seq. | w         | w'        | y               | y <sup>++</sup> | y <sup>+</sup> | y <sup>+++</sup> | y <sup>0</sup> | y <sup>0++</sup> | z+1             | z+1 <sup>++</sup> | z+2             | z+2 <sup>++</sup> | #  |
|----|-----------|-----------------|----------------|------------------|----------------|------------------|-----------|-----------------|------|-----------|-----------|-----------------|-----------------|----------------|------------------|----------------|------------------|-----------------|-------------------|-----------------|-------------------|----|
| 1  | 143.1179  | 72.0626         | 126.0913       | 63.5493          |                |                  | 160.1444  | 80.5759         | K    |           |           |                 |                 |                |                  |                |                  |                 |                   |                 |                   | 16 |
| 2  | 242.1863  | 121.5968        | 225.1598       | 113.0835         |                |                  | 259.2129  | 130.1101        | V    | 1690.9963 |           | 1722.0385       | 861.5229        | 1705.0119      | 853.0096         | 1704.0279      | 852.5176         | 1706.0197       | 853.5135          | 1707.0276       | 854.0174          | 15 |
| 3  | 355.2704  | <b>178.1388</b> | 338.2438       | 169.6255         |                |                  | 372.2969  | 186.6521        | L    | 1563.8966 |           | 1622.9701       | 811.9887        | 1605.9435      | 803.4754         | 1604.9595      | 802.9834         | 1606.9513       | 803.9793          | 1607.9592       | 804.4832          | 14 |
| 4  | 539.4028  | 270.2050        | 522.3762       | 261.6918         |                |                  | 556.4293  | <b>278.7183</b> | R    | 1379.7641 |           | 1509.8860       | 755.4466        | 1492.8594      | 746.9334         | 1491.8754      | 746.4413         | 1493.8673       | 747.4373          | 1494.8751       | 747.9412          | 13 |
| 5  | 654.4297  | <b>327.7185</b> | 637.4032       | 319.2052         | 636.4192       | 318.7132         | 671.4563  | 336.2318        | D    | 1264.7372 |           | 1325.7536       | 663.3804        | 1308.7270      | 654.8572         | 1307.7430      | 654.3751         | 1309.7349       | 655.3711          | 1310.7427       | 655.8750          | 12 |
| 6  | 768.4726  | 384.7400        | 751.4461       | 376.2267         | 750.4621       | 375.7347         | 785.4992  | 393.2532        | N    | 1150.6943 |           | 1210.7266       | 605.8670        | 1193.7001      | 597.3357         | 1192.7161      | <b>596.8617</b>  | 1194.7079       | 597.8576          | 1195.7157       | 598.3615          | 11 |
| 7  | 881.5567  | <b>441.2820</b> | 864.5302       | 432.7687         | 863.5461       | 432.2767         | 898.5833  | 449.7953        | I    | 1051.6259 | 1065.6415 | 1096.6837       | 548.8455        | 1079.6572      | 540.3322         | 1078.6731      | 539.8402         | 1080.6650       | 540.8361          | 1081.6728       | 541.3400          | 10 |
| 8  | 1009.6153 | 505.3113        | 992.5887       | 496.7980         | 991.6047       | 496.3060         | 1026.6418 | 513.8246        | Q    | 909.5516  |           | 983.5996        | 492.3035        | 966.5731       | 483.7902         | 965.5891       | 483.2982         | 967.5809        | 484.2941          | 968.5887        | 484.7980          | 9  |
| 9  | 1066.6368 | <b>538.8220</b> | 1049.6102      | 525.3087         | 1048.6262      | 524.8167         | 1083.6633 | 542.3353        | G    |           |           | <b>855.5411</b> | <b>428.2742</b> | 838.5145       | 419.7609         | 837.5305       | 419.2689         | 839.5223        | 420.2648          | 840.5302        | 420.7687          | 8  |
| 10 | 1179.7208 | <b>590.3640</b> | 1162.6943      | 581.8508         | 1161.7103      | 581.3588         | 1196.7474 | 598.8773        | I    | 753.4618  | 767.4774  | 798.5196        | 399.7634        | 781.4931       | 391.2502         | 780.5090       | 390.7582         | 782.5009        | 391.7541          | 783.5087        | 392.2580          | 7  |
| 11 | 1280.7685 | <b>640.8879</b> | 1263.7419      | <b>632.3746</b>  | 1262.7579      | <b>631.8826</b>  | 1297.7950 | 649.4012        | T    | 652.4141  | 654.3933  | <b>685.4355</b> | <b>343.2214</b> | 668.4090       | 334.7081         | 667.4250       | 334.2161         | 669.4168        | 335.2120          | 670.4246        | 335.7160          | 6  |
| 12 | 1408.8635 | <b>704.9354</b> | 1391.8369      | 696.4221         | 1390.8529      | 695.9301         | 1425.8900 | 713.4486        | K    | 510.3035  |           | <b>584.3879</b> | 292.6976        | 567.3613       | 284.1843         |                |                  | 568.3691        | 284.6882          | 569.3770        | 285.1921          | 5  |
| 13 | 1505.9162 | 753.4618        | 1488.8897      | 744.9485         | 1487.9057      | 744.4565         | 1522.9428 | 761.9750        | P    | 413.2507  |           | <b>456.2929</b> | <b>228.6501</b> | 439.2663       | 220.1368         |                |                  | 440.2742        | 220.6407          | <b>441.2820</b> | 221.1446          | 4  |
| 14 | 1576.9533 | 788.9803        | 1559.9268      | 780.4670         | 1558.9428      | 779.9750         | 1593.9799 | 797.4936        | A    |           |           | <b>359.2401</b> | 180.1237        | 342.2136       | 171.6104         |                |                  | <b>343.2214</b> | 172.1143          | 344.2292        | 172.6183          | 3  |
| 15 | 1690.0374 | 845.5223        | 1673.0109      | 837.0091         | 1672.0268      | 836.5171         | 1707.0640 | 845.0356        | I    | 243.1452  | 257.1608  | <b>288.2030</b> | 144.6051        | 271.1765       | 136.0919         |                |                  | 272.1843        | 136.5958          | 273.1921        | 137.0997          | 2  |
| 16 |           |                 |                |                  |                |                  |           |                 | R    | 73.0284   |           | <b>175.1190</b> | 88.0631         | 158.0924       | 79.5498          |                |                  | 159.1002        | 80.0538           | 160.1081        | 80.5577           | 1  |

Monoisotopic mass of neutral peptide Mr(calc): 1863.1418

Fixed modifications: Carbamidomethyl (C) (apply to specified residues or termini only)

Variable modifications:

K1 : Methyl\_KR (KR)

R4 : Dimethyl\_KR (KR)

Ions Score: 35 Expect: 0.042

Matches : 23/269 fragment ions using 48 most intense peaks ([help](#))

# Mascot Search Results: Peptide View

Kme1VLRme2DNIQGITKPAIR

MS/MS Fragmentation of **KVLRDNIQGITKPAIR**

Found in **sp|P62806|H4\_MOUSE** in **fgcz\_10090**, Histone H4 OS=Mus musculus GN=Hist1h4a

Match to Query 3077: 1849.125492 from(617.382440,3+) intensity(522432.8100) scans(4360) rtinseconds(2417.348) index(2873)

Title: 2874: Scan 4360 (t=40.2891) [s:lp749\Proteomics\ORBI\_2\andreamizzi\_20110517\_sperm\_trypsin\_GluC\_ETD\_CID\20110517\_01\_NaCl\_1.RAW]

Data file 20110517\_01\_NaCl\_1.mgf

Click mouse within plot area to zoom in by factor of two about that point

Or,  to  Da

Label all possible matches  Label matches used for scoring

Show Y-axis

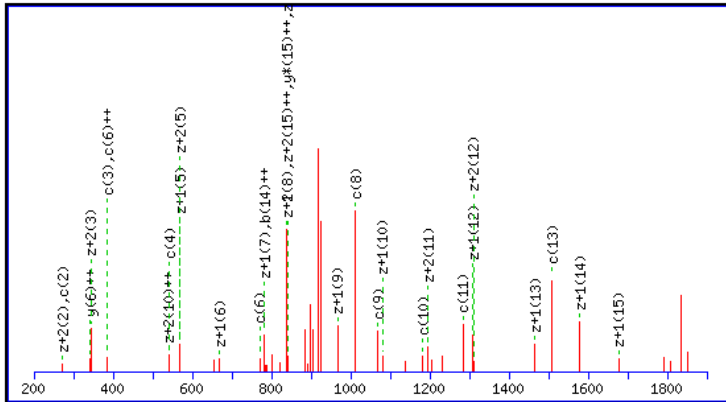

| #  | b         | b <sup>++</sup> | b <sup>+</sup> | b <sup>***</sup> | b <sup>0</sup> | b <sup>0**</sup> | c                | c <sup>++</sup> | Seq. | w         | w'        | y         | y <sup>++</sup> | y <sup>+</sup> | y <sup>***</sup> | y <sup>0</sup> | y <sup>0**</sup> | z+1              | z+1 <sup>++</sup> | z+2              | z+2 <sup>++</sup> | #         |    |
|----|-----------|-----------------|----------------|------------------|----------------|------------------|------------------|-----------------|------|-----------|-----------|-----------|-----------------|----------------|------------------|----------------|------------------|------------------|-------------------|------------------|-------------------|-----------|----|
| 1  | 157.1335  | 79.0704         | 140.1070       | 70.5571          |                |                  | 174.1601         | 87.5837         | K    |           |           |           |                 |                |                  |                |                  |                  |                   |                  |                   |           | 16 |
| 2  | 256.2020  | 128.6046        | 239.1754       | 120.0913         |                |                  | <b>273.2285</b>  | 137.1179        | V    | 1662.9650 |           | 1694.0072 | 847.5072        | 1676.9806      | <b>838.9939</b>  | 1675.9966      | 838.5019         | <b>1677.9884</b> | <b>839.4979</b>   | 1678.9963        | <b>840.0018</b>   | <b>15</b> |    |
| 3  | 369.2860  | 185.1466        | 352.2595       | 176.6334         |                |                  | <b>386.3126</b>  | 193.6599        | L    | 1535.8653 |           | 1594.9388 | 797.9730        | 1577.9122      | 789.4597         | 1576.9282      | 788.9677         | <b>1576.9200</b> | 789.9637          | 1579.9279        | 790.4676          | <b>14</b> |    |
| 4  | 525.3871  | 263.1972        | 508.3066       | 254.6839         |                |                  | <b>542.4137</b>  | 271.7105        | R    | 1379.7641 |           | 1481.8547 | 741.4310        | 1464.8281      | 732.9177         | 1463.8441      | 732.4257         | <b>1465.8360</b> | 733.4216          | 1466.8438        | 733.9255          | <b>13</b> |    |
| 5  | 640.4141  | 320.7107        | 623.3875       | 312.1974         | 622.4035       | 311.7054         | 657.4406         | 329.2239        | D    | 1264.7372 |           | 1325.7536 | 663.3804        | 1308.7270      | 654.8672         | 1307.7430      | 654.3752         | <b>1309.7349</b> | 655.3711          | <b>1310.7427</b> | 655.8750          | <b>12</b> |    |
| 6  | 754.4570  | 377.7321        | 737.4304       | 369.2189         | 736.4464       | 368.7269         | <b>771.4835</b>  | <b>386.2454</b> | N    | 1150.6943 |           | 1210.7266 | 605.8670        | 1193.7001      | 597.3537         | 1192.7161      | 596.8617         | 1194.7079        | 597.8576          | <b>1195.7157</b> | 598.3615          | <b>11</b> |    |
| 7  | 867.5411  | 434.2742        | 850.5145       | 425.7609         | 849.5305       | 425.2689         | 884.5676         | 442.7874        | I    | 1051.6259 | 1065.6415 | 1096.6837 | 548.8455        | 1079.6572      | 540.3322         | 1078.6731      | 539.8402         | <b>1080.6850</b> | 540.8361          | 1081.6728        | <b>541.3400</b>   | <b>10</b> |    |
| 8  | 995.5996  | 498.3035        | 978.5731       | 489.7907         | 977.5891       | 489.2982         | <b>1012.6262</b> | 506.8167        | Q    | 909.5516  |           | 983.5996  | 492.3035        | 966.5731       | 483.7902         | 965.5891       | 483.2982         | <b>967.5809</b>  | 484.2941          | 968.5887         | 484.7980          | <b>9</b>  |    |
| 9  | 1052.6211 | 526.8142        | 1035.5946      | 518.3009         | 1034.6105      | 517.8089         | <b>1069.6477</b> | 535.3275        | G    |           |           | 855.5411  | 428.2742        | 838.5145       | 419.7609         | 837.5305       | 419.2689         | <b>839.5223</b>  | 420.2648          | <b>840.5302</b>  | 420.7687          | <b>8</b>  |    |
| 10 | 1165.7052 | 583.3562        | 1148.6786      | 574.8429         | 1147.6946      | 574.3509         | <b>1182.7317</b> | 591.8695        | T    | 753.4618  | 767.4774  | 798.5196  | 399.7634        | 781.4931       | 391.2502         | 780.5090       | 390.7582         | <b>782.5009</b>  | 391.7541          | 783.5087         | 392.2580          | <b>7</b>  |    |
| 11 | 1266.7528 | 633.8801        | 1249.7263      | 625.3668         | 1248.7423      | 624.8748         | <b>1283.7794</b> | 642.3933        | T    | 652.4141  | 654.3933  | 685.4355  | <b>343.2214</b> | 668.4090       | 334.7081         | 667.4250       | 334.2161         | <b>669.4168</b>  | 335.2120          | 670.4246         | 335.7160          | <b>6</b>  |    |
| 12 | 1394.8478 | 697.9275        | 1377.8213      | 689.4143         | 1376.8372      | 688.9223         | 1411.8744        | 706.4408        | K    | 510.3035  |           | 584.3879  | 292.6976        | 567.3613       | 284.1843         |                |                  | <b>568.3691</b>  | 284.6882          | <b>569.3770</b>  | 285.1921          | <b>5</b>  |    |
| 13 | 1491.9006 | 746.4539        | 1474.8740      | 737.9407         | 1473.8900      | 737.4486         | <b>1508.9271</b> | 754.9672        | P    | 413.2507  |           | 456.2929  | 228.6501        | 439.2663       | 220.1368         |                |                  | 440.2742         | 220.6407          | 441.2820         | 221.1446          | <b>4</b>  |    |
| 14 | 1562.9377 | <b>781.9725</b> | 1545.9111      | 773.4592         | 1544.9271      | 772.9672         | 1579.9642        | 790.4858        | A    |           |           | 359.2401  | 180.1237        | 342.2136       | 171.6104         |                |                  | <b>343.2214</b>  | 172.1143          | <b>344.2292</b>  | 172.6183          | <b>3</b>  |    |
| 15 | 1676.0218 | 838.5145        | 1658.9952      | 830.0012         | 1658.0112      | 829.5092         | 1693.0483        | 847.0278        | I    | 243.1452  | 257.1608  | 288.2030  | 144.6051        | 271.1765       | 136.0919         |                |                  | 272.1843         | 136.5958          | <b>273.1921</b>  | 137.0997          | <b>2</b>  |    |
| 16 |           |                 |                |                  |                |                  |                  |                 | R    | 73.0284   |           | 175.1190  | 88.0631         | 158.0924       | 79.5498          |                |                  | 159.1002         | 80.0538           | 160.1081         | 80.5577           | <b>1</b>  |    |

Monoisotopic mass of neutral peptide Mr(calc): 1849.1261

Fixed modifications: Carbamidomethyl (C) (apply to specified residues or termini only)

Variable modifications:

K1 : Dimethyl\_KR (KR)

Ions Score: 83 Expect: 3e-06

Matches : 33/269 fragment ions using 38 most intense peaks ([help](#))

# Mascot Search Results: Peptide View

Kme2VLRDNIQGITKPAIR

MS/MS Fragmentation of **KVLRDNIQGITKPAIR**

Found in **sp|P62806|H4\_MOUSE** in **fgcz\_10090**, Histone H4 OS=Mus musculus GN=Hist1h4a

Match to Query 2075: 1849.126416 from(463.288880,4+) intensity(309250.4400) scans(4176) rtinseconds(2380.369) index(2556)

Title: 2557: Scan 4176 (rt=39.6728) [s:\p749\Proteomics\ORBI\_2\andreamizzi\_20110517\_sperm\_trypsin\_GluC\_ETD\_CID\20110519\_04\_trypsin\_swimup\_NaCl\_2.RAW]

Data file \\fgcz-ms.uzh.ch\p749\Proteomics\ORBI\_2\andreamizzi\_20110517\_sperm\_trypsin\_GluC\_ETD\_CID\mgf\_low\_res\_MS2\_nomerge\20110519\_04\_trypsin\_swimup\_NaCl\_2.mgf

Click mouse within plot area to zoom in by factor of two about that point

Or, Plot from  to  Da

Label all possible matches  Label matches used for scoring

Show Y-axis

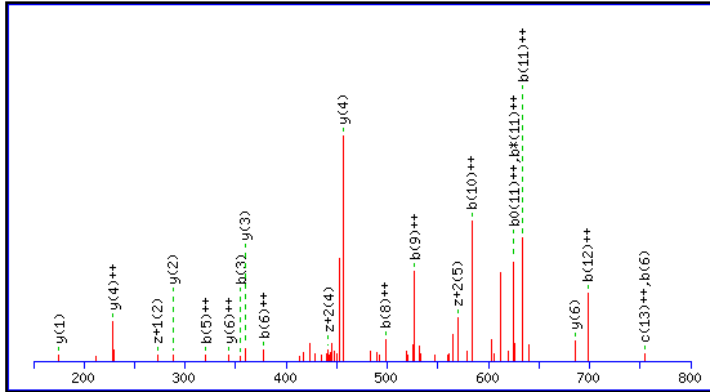

| #  | b               | b <sup>++</sup> | b <sup>*</sup> | b <sup>+++</sup> | b <sup>0</sup> | b <sup>0++</sup> | c         | c <sup>++</sup> | Seq. | w         | w'        | y               | y <sup>++</sup> | y <sup>*</sup> | y <sup>+++</sup> | y <sup>0</sup> | y <sup>0++</sup> | z+1             | z+1 <sup>++</sup> | z+2             | z+2 <sup>++</sup> | # |    |
|----|-----------------|-----------------|----------------|------------------|----------------|------------------|-----------|-----------------|------|-----------|-----------|-----------------|-----------------|----------------|------------------|----------------|------------------|-----------------|-------------------|-----------------|-------------------|---|----|
| 1  | 143.1179        | 72.0626         | 126.0913       | 63.5493          |                |                  | 160.1444  | 80.5759         | K    |           |           |                 |                 |                |                  |                |                  |                 |                   |                 |                   |   | 16 |
| 2  | 242.1863        | 121.5968        | 225.1598       | 113.0835         |                |                  | 259.2129  | 130.1101        | V    | 1676.9806 |           | 1708.0228       | 854.5150        | 1690.9963      | 846.0018         | 1690.0122      | 845.5098         | 1692.0041       | 846.5057          | 1693.0119       | 847.0096          |   | 15 |
| 3  | <b>355.2704</b> | 178.1388        | 338.2438       | 169.6255         |                |                  | 372.2969  | 186.6521        | L    | 1549.8809 |           | 1608.9544       | 804.9808        | 1591.9279      | 796.4676         | 1590.9438      | 795.9756         | 1592.9357       | 796.9715          | 1593.9435       | 797.4754          |   | 14 |
| 4  | 525.3871        | 263.1972        | 508.3606       | 254.6839         |                |                  | 542.4137  | 271.7105        | R    | 1379.7641 |           | 1495.8703       | 748.4388        | 1478.8438      | 739.9255         | 1477.8598      | 739.4335         | 1479.8516       | 740.4294          | 1480.8594       | 740.9334          |   | 13 |
| 5  | 640.4141        | <b>320.7107</b> | 623.3875       | 312.1974         | 622.4035       | 311.7054         | 657.4406  | 329.2239        | D    | 1264.7372 |           | 1325.7536       | 663.3804        | 1308.7270      | 654.8672         | 1307.7430      | 654.3751         | 1309.7349       | 655.3711          | 1310.7427       | 655.8750          |   | 12 |
| 6  | <b>754.4570</b> | <b>377.7321</b> | 737.4304       | 369.2189         | 736.4464       | 368.7269         | 771.4835  | 386.2454        | N    | 1150.6943 |           | 1210.7266       | 605.8670        | 1193.7001      | 597.3537         | 1192.7161      | 596.8617         | 1194.7079       | 597.8576          | 1195.7157       | 598.3615          |   | 11 |
| 7  | 867.5411        | 434.2742        | 850.5145       | 425.7609         | 849.5305       | 425.2689         | 884.5676  | 442.7874        | I    | 1051.6259 | 1065.6415 | 1096.6837       | 548.8455        | 1079.6572      | 540.3322         | 1078.6731      | 539.8402         | 1080.6650       | 540.8361          | 1081.6728       | 541.3400          |   | 10 |
| 8  | 995.5996        | <b>498.3035</b> | 978.5731       | 489.7902         | 977.5891       | 489.2982         | 1012.6262 | 506.8167        | Q    | 909.5516  |           | 983.5996        | 492.3035        | 966.5731       | 483.7902         | 965.5891       | 483.2982         | 967.5809        | 484.2941          | 968.5887        | 484.7980          |   | 9  |
| 9  | 1052.6211       | <b>526.8142</b> | 1035.5946      | 518.3009         | 1034.6105      | 517.8089         | 1069.6477 | 535.3275        | G    |           |           | 855.5411        | 428.2742        | 838.5145       | 419.7609         | 837.5305       | 419.2689         | 839.5223        | 420.2648          | 840.5302        | 420.7687          |   | 8  |
| 10 | 1165.7052       | <b>583.3562</b> | 1148.6786      | 574.8429         | 1147.6946      | 574.3509         | 1182.7317 | 591.8695        | I    | 753.4618  | 767.4774  | 798.5196        | 399.7634        | 781.4931       | 391.2502         | 780.5090       | 390.7582         | 782.5009        | 391.7541          | 783.5087        | 392.2580          |   | 7  |
| 11 | 1266.7528       | <b>633.8807</b> | 1249.7263      | <b>625.3668</b>  | 1248.7423      | <b>624.8748</b>  | 1283.7794 | 642.3933        | T    | 652.4141  | 654.3933  | <b>685.4355</b> | <b>343.2214</b> | 668.4090       | 340.7081         | 667.4250       | 342.2161         | 669.4168        | 335.2120          | 670.4246        | 335.7160          |   | 6  |
| 12 | 1394.8478       | <b>697.9275</b> | 1377.8213      | 689.4143         | 1376.8372      | 688.9223         | 1411.8744 | 706.4408        | K    | 510.3035  |           | 584.3879        | 292.6976        | 567.3613       | 284.1843         |                |                  | 568.3691        | 284.6882          | <b>569.3770</b> | 285.1921          |   | 5  |
| 13 | 1491.9006       | 746.4539        | 1474.8740      | 737.9407         | 1473.8900      | 737.4486         | 1508.9271 | <b>754.9672</b> | P    | 413.2507  |           | <b>456.2929</b> | <b>228.6501</b> | 439.2663       | 220.1368         |                |                  | 440.2742        | 220.6407          | <b>441.2820</b> | 221.1446          |   | 4  |
| 14 | 1562.9377       | 781.9725        | 1545.9111      | 773.4592         | 1544.9271      | 772.9672         | 1579.9642 | 790.4858        | A    |           |           | <b>359.2407</b> | 180.1237        | 342.2136       | 171.6104         |                |                  | <b>343.2214</b> | 172.1143          | 344.2292        | 172.6183          |   | 3  |
| 15 | 1676.0218       | 838.5145        | 1658.9952      | 830.0012         | 1658.0112      | 829.5092         | 1693.0483 | 847.0278        | I    | 243.1452  | 257.1608  | <b>288.2030</b> | 144.6051        | 271.1765       | 136.0919         |                |                  | <b>272.1843</b> | 136.5958          | 273.1921        | 137.0997          |   | 2  |
| 16 |                 |                 |                |                  |                |                  |           |                 | R    | 73.0284   |           | <b>175.1190</b> | 88.0631         | 158.0924       | 79.5498          |                |                  | 159.1002        | 80.0538           | 160.1081        | 80.5577           |   | 1  |

Monoisotopic mass of neutral peptide Mr(calc): 1849.1261

Fixed modifications: Carbamidomethyl (C) (apply to specified residues or termini only)

Variable modifications:

K1 : Methyl\_KR (KR)

R4 : Methyl\_KR (KR)

Ions Score: 48 Expect: 0.014

Matches : 23/269 fragment ions using 32 most intense peaks ([help](#))

# Mascot Search Results: Peptide View

Kme1VLRme1DNIQGITKPAIR

MS/MS Fragmentation of **KVLRDNIQGITKPAIR**

Found in **sp|P62806|H4\_MOUSE** in **fgcz\_10090**, Histone H4 OS=Mus musculus GN=Hist1h4a

Match to Query 3835: 1849.126216 from(463.288830,4+) intensity(190233.0500) scans(3455) rtinseconds(2388.7616) index(1611)

Title: 1467: Scan 3455 (rt=39.8127) [s:\p749\Proteomics\ORBI\_2\andreamizzi\_20110310\_sperm\_trypsin\_chymo\_AspN\_ETD\_CID\20110311\_37\_NaCl\_trypsin\_SCX\_3\_RAW]

Data file Y:\p749\Proteomics\Mascot\mgf50\_20110426\_sperm\_rerun\_trypsin\_2nd\_ETD\_run\_NaCl\_SCX\mascot\_daemon\_merge.mgf

Click mouse within plot area to zoom in by factor of two about that point

Or,  to  Da

Label all possible matches  Label matches used for scoring

Show Y-axis

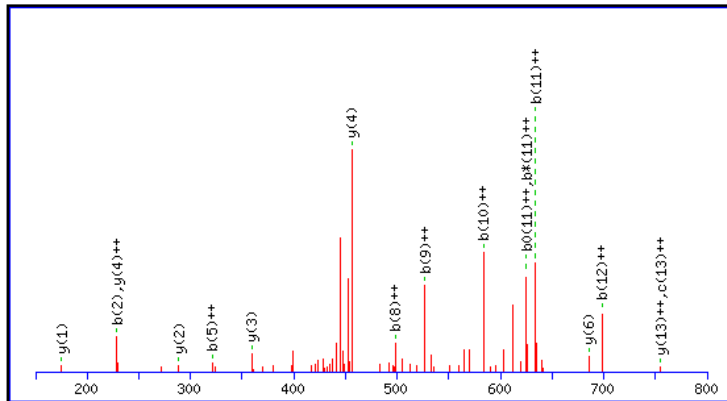

| #  | b         | b <sup>++</sup> | b <sup>+</sup> | b <sup>+++</sup> | b <sup>0</sup> | b <sup>0++</sup> | c         | c <sup>++</sup> | Seq. | w         | w'        | y         | y <sup>+</sup> | y <sup>+</sup> | y <sup>++</sup> | y <sup>0</sup> | y <sup>0++</sup> | z+1       | z+1 <sup>++</sup> | z+2       | z+2 <sup>++</sup> | # |    |
|----|-----------|-----------------|----------------|------------------|----------------|------------------|-----------|-----------------|------|-----------|-----------|-----------|----------------|----------------|-----------------|----------------|------------------|-----------|-------------------|-----------|-------------------|---|----|
| 1  | 129.1022  | 65.0548         | 112.0757       | 56.5415          |                |                  | 146.1288  | 73.5680         | K    |           |           |           |                |                |                 |                |                  |           |                   |           |                   |   | 16 |
| 2  | 228.1707  | 114.5890        | 211.1441       | 106.0757         |                |                  | 245.1972  | 123.1022        | V    | 1690.9963 |           | 1722.0385 | 861.5229       | 1705.0119      | 853.0096        | 1704.0279      | 852.5176         | 1706.0197 | 853.5135          | 1707.0276 | 854.0174          |   | 15 |
| 3  | 341.2547  | 171.1310        | 324.2282       | 162.6177         |                |                  | 358.2813  | 179.6443        | L    | 1563.8966 |           | 1622.9701 | 811.9887       | 1605.9435      | 803.4754        | 1604.9595      | 802.9834         | 1606.9513 | 803.9793          | 1607.9592 | 804.4832          |   | 14 |
| 4  | 525.3871  | 263.1972        | 508.3606       | 254.6839         |                |                  | 542.4137  | 271.7105        | R    | 1379.7641 |           | 1509.8860 | 755.4466       | 1492.8594      | 746.9334        | 1491.8754      | 746.4413         | 1493.8673 | 747.4373          | 1494.8751 | 747.9412          |   | 13 |
| 5  | 640.4141  | 320.7107        | 623.3875       | 312.1974         | 622.4035       | 311.7054         | 657.4406  | 329.2239        | D    | 1264.7372 |           | 1325.7536 | 663.3804       | 1308.7270      | 654.8672        | 1307.7430      | 654.3751         | 1309.7349 | 655.3711          | 1310.7427 | 655.8750          |   | 12 |
| 6  | 754.4570  | 377.7321        | 737.4304       | 369.2189         | 736.4464       | 368.7269         | 771.4835  | 386.2454        | N    | 1150.6943 |           | 1210.7266 | 605.8670       | 1193.7001      | 597.3537        | 1192.7161      | 596.8617         | 1194.7079 | 597.8576          | 1195.7157 | 598.3615          |   | 11 |
| 7  | 867.5411  | 434.2742        | 850.5145       | 425.7609         | 849.5305       | 425.2689         | 884.5676  | 442.7874        | I    | 1051.6259 | 1065.6415 | 1096.6837 | 548.8455       | 1079.6572      | 540.3322        | 1078.6731      | 539.8402         | 1080.6650 | 540.8361          | 1081.6728 | 541.3400          |   | 10 |
| 8  | 995.5996  | 498.3035        | 978.5731       | 489.7902         | 977.5891       | 489.2982         | 1012.6262 | 506.8167        | Q    | 909.5516  |           | 983.5996  | 492.3035       | 965.5731       | 483.7902        | 965.5891       | 483.2982         | 967.5809  | 484.2941          | 968.5887  | 484.7980          |   | 9  |
| 9  | 1052.6211 | 526.8142        | 1035.5946      | 518.3009         | 1034.6105      | 517.8089         | 1069.6477 | 535.3275        | G    |           |           | 855.5411  | 428.2742       | 838.5145       | 419.7609        | 837.5305       | 419.2689         | 839.5223  | 420.2648          | 840.5302  | 420.7687          |   | 8  |
| 10 | 1165.7052 | 583.3562        | 1148.6786      | 574.8429         | 1147.6946      | 574.3509         | 1182.7317 | 591.8695        | I    | 753.4618  | 767.4774  | 798.5196  | 399.7634       | 781.4931       | 391.2502        | 780.5090       | 390.7582         | 782.5009  | 391.7541          | 783.5087  | 392.2580          |   | 7  |
| 11 | 1266.7528 | 633.8807        | 1249.7263      | 625.3668         | 1248.7423      | 624.8748         | 1283.7794 | 642.3933        | T    | 652.4141  | 654.3933  | 685.4355  | 343.2214       | 668.4090       | 334.7081        | 667.4250       | 334.2161         | 669.4168  | 335.2120          | 670.4246  | 335.7160          |   | 6  |
| 12 | 1394.8478 | 697.9275        | 1377.8213      | 689.4143         | 1376.8372      | 688.9223         | 1411.8744 | 706.4408        | K    | 510.3035  |           | 584.3879  | 292.6976       | 567.3613       | 284.1843        |                |                  | 568.3691  | 284.6882          | 569.3770  | 285.1921          |   | 5  |
| 13 | 1491.9006 | 746.4539        | 1474.8740      | 737.9407         | 1473.8900      | 737.4486         | 1508.9271 | 754.9672        | P    | 413.2507  |           | 456.2929  | 228.6501       | 439.2663       | 220.1368        |                |                  | 440.2742  | 220.6407          | 441.2820  | 221.1446          |   | 4  |
| 14 | 1562.9377 | 781.9725        | 1545.9111      | 773.4592         | 1544.9271      | 772.9672         | 1579.9642 | 790.4858        | A    |           |           | 359.2407  | 180.1237       | 342.2136       | 171.6104        |                |                  | 343.2214  | 172.1143          | 344.2292  | 172.6183          |   | 3  |
| 15 | 1676.0218 | 838.5145        | 1658.9952      | 830.0012         | 1658.0112      | 829.5092         | 1693.0483 | 847.0278        | I    | 243.1452  | 257.1608  | 288.2030  | 144.6051       | 271.1765       | 136.0919        |                |                  | 272.1843  | 136.5958          | 273.1921  | 137.0997          |   | 2  |
| 16 |           |                 |                |                  |                |                  |           |                 | R    | 73.0284   |           | 175.1190  | 88.0631        | 158.0924       | 79.5498         |                |                  | 159.1002  | 80.0538           | 160.1081  | 80.5577           |   | 1  |

Monoisotopic mass of neutral peptide Mr(calc): 1849.1261

Fixed modifications: Carbamidomethyl (C) (apply to specified residues or termini only)

Variable modifications:

R4 : Dimethyl\_KR (KR)

Ions Score: 49 Expect: 0.011

Matches : 17/269 fragment ions using 18 most intense peaks ([help](#))

# Mascot Search Results: Peptide View

KVLRme2DNIQGITKPAIR



MS/MS Fragmentation of **KVLRDNIQGITKPAIR**

Found in **sp|P62806|H4\_MOUSE** in **fgcz\_10090**, Histone H4 OS=Mus musculus GN=Hist1h4a

Match to Query 3894: 1863.141016 from(466.792530,4+) intensity(1253669.0000) scans(3322) rtinseconds(2361.4256) index(4541)

Title: 1515: Scan 3322 (rt=39.3571) [s:\p749\Proteomics\ORBI\_2\andreamizzi\_20110310\_sperm\_trypsin\_chymo\_AspN\_ETD\_CID\20110311\_34\_NaCl\_trypsin\_SCX\_FT\_RAW]

Data file Y:\p749\Proteomics\Mascot\mgf50\_20110426\_sperm\_rerun\_trypsin\_2nd\_ETD\_run\_NaCl\_SCX\mascot\_daemon\_merge.mgf

Click mouse within plot area to zoom in by factor of two about that point

Or, Plot from  to  Da

Label all possible matches  Label matches used for scoring

Show Y-axis

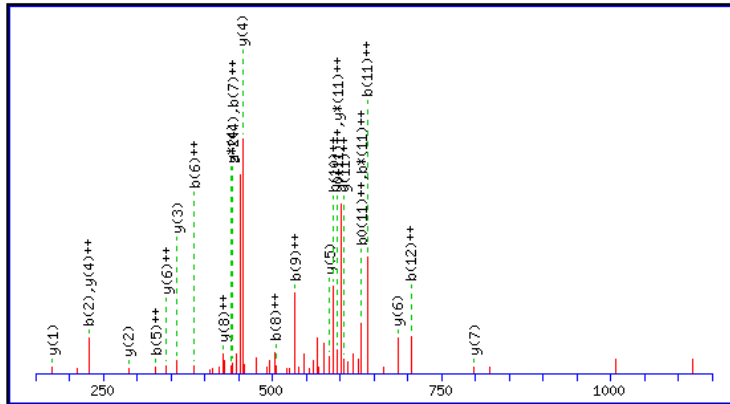

| #  | b         | b <sup>++</sup> | b <sup>*</sup> | b <sup>***</sup> | b <sup>0</sup> | b <sup>0++</sup> | c         | c <sup>++</sup> | Seq. | w         | w <sup>*</sup> | y         | y <sup>++</sup> | y <sup>*</sup> | y <sup>***</sup> | y <sup>0</sup> | y <sup>0++</sup> | z+1       | z+1 <sup>++</sup> | z+2       | z+2 <sup>++</sup> | # |    |
|----|-----------|-----------------|----------------|------------------|----------------|------------------|-----------|-----------------|------|-----------|----------------|-----------|-----------------|----------------|------------------|----------------|------------------|-----------|-------------------|-----------|-------------------|---|----|
| 1  | 129.1022  | 65.0548         | 112.0757       | 56.5415          |                |                  | 146.1288  | 73.5680         | K    |           |                |           |                 |                |                  |                |                  |           |                   |           |                   |   | 16 |
| 2  | 228.1707  | 114.5890        | 211.1441       | 106.0757         |                |                  | 245.1972  | 123.1022        | V    | 1705.0119 |                | 1736.0541 | 868.5307        | 1719.0276      | 860.0174         | 1718.0435      | 859.5254         | 1720.0354 | 860.5213          | 1721.0432 | 861.0252          |   | 15 |
| 3  | 341.2547  | 171.1310        | 324.2282       | 162.6177         |                |                  | 358.2813  | 179.6443        | L    | 1577.9122 |                | 1636.9857 | 818.9965        | 1619.9592      | 810.4832         | 1618.9751      | 809.9912         | 1620.9670 | 810.9871          | 1621.9748 | 811.4910          |   | 14 |
| 4  | 539.4028  | 270.2050        | 522.3762       | 261.6918         |                |                  | 556.4293  | 278.7183        | R    | 1379.7641 |                | 1523.9016 | 762.4545        | 1508.7641      | 753.9412         | 1505.8911      | 753.4492         | 1507.8829 | 754.4451          | 1508.8907 | 754.9490          |   | 13 |
| 5  | 654.4297  | 327.7185        | 637.4032       | 319.2052         | 636.4192       | 318.7132         | 671.4563  | 336.2318        | D    | 1264.7372 |                | 1325.7536 | 663.3804        | 1308.7270      | 654.8672         | 1307.7430      | 654.3751         | 1309.7349 | 655.3711          | 1310.7427 | 655.8750          |   | 12 |
| 6  | 768.4726  | 384.7400        | 751.4461       | 376.2267         | 750.4621       | 375.7347         | 785.4992  | 393.2532        | N    | 1150.6943 |                | 1210.7266 | 605.8670        | 1193.7001      | 597.3537         | 1192.7161      | 596.8617         | 1194.7079 | 597.8576          | 1195.7157 | 598.3615          |   | 11 |
| 7  | 881.5567  | 441.2820        | 864.5302       | 432.7687         | 863.5461       | 432.2767         | 898.5833  | 449.7953        | T    | 1051.6259 | 1065.6415      | 1096.6837 | 548.8455        | 1079.6572      | 540.3322         | 1078.6731      | 539.8402         | 1080.6650 | 540.8361          | 1081.6728 | 541.3400          |   | 10 |
| 8  | 1009.6153 | 505.3113        | 992.5887       | 496.7980         | 991.6047       | 496.3060         | 1026.6418 | 513.8246        | Q    | 909.5516  |                | 983.5996  | 492.3035        | 966.5731       | 483.7902         | 965.5891       | 483.2982         | 967.5809  | 484.2941          | 968.5887  | 484.7980          |   | 9  |
| 9  | 1066.6368 | 533.8220        | 1049.6102      | 525.3087         | 1048.6262      | 524.8167         | 1083.6633 | 542.3353        | G    |           |                | 855.5411  | 428.2742        | 838.5145       | 419.7609         | 837.5305       | 419.2689         | 839.5223  | 420.2648          | 840.5302  | 420.7687          |   | 8  |
| 10 | 1179.7208 | 590.3640        | 1162.6943      | 581.8508         | 1161.7103      | 581.3588         | 1196.7474 | 598.8773        | I    | 753.4618  | 767.4774       | 798.5196  | 399.7634        | 781.4931       | 391.2502         | 780.5090       | 390.7582         | 782.5009  | 391.7541          | 783.5087  | 392.2580          |   | 7  |
| 11 | 1280.7685 | 640.8879        | 1263.7419      | 632.3746         | 1262.7579      | 631.8826         | 1297.7950 | 649.4012        | T    | 652.4141  | 654.3933       | 685.4355  | 343.2214        | 668.4090       | 334.7081         | 667.4250       | 334.2161         | 669.4168  | 335.2120          | 670.4246  | 335.7160          |   | 6  |
| 12 | 1408.8635 | 704.9354        | 1391.8369      | 696.4221         | 1390.8529      | 695.9301         | 1425.8900 | 713.4486        | K    | 510.3035  |                | 584.3879  | 292.6976        | 567.3613       | 284.1843         |                |                  | 568.3691  | 284.6882          | 569.3770  | 285.1921          |   | 5  |
| 13 | 1505.9162 | 753.4618        | 1488.8897      | 744.9485         | 1487.9057      | 744.4565         | 1522.9428 | 761.9750        | P    | 413.2507  |                | 456.2929  | 228.6501        | 439.2663       | 220.1368         |                |                  | 440.2742  | 220.6407          | 441.2820  | 221.1446          |   | 4  |
| 14 | 1576.9533 | 788.9803        | 1559.9268      | 780.4670         | 1558.9428      | 779.9750         | 1593.9799 | 797.4936        | A    |           |                | 359.2401  | 180.1237        | 342.2136       | 171.6104         |                |                  | 343.2214  | 172.1143          | 344.2292  | 172.6183          |   | 3  |
| 15 | 1690.0374 | 845.5223        | 1673.0109      | 837.0091         | 1672.0268      | 836.5171         | 1707.0640 | 854.0356        | I    | 243.1452  | 257.1608       | 288.2030  | 144.6051        | 271.1765       | 136.0919         |                |                  | 272.1843  | 136.5958          | 273.1921  | 137.0997          |   | 2  |
| 16 |           |                 |                |                  |                |                  |           |                 | R    | 73.0284   |                | 175.1190  | 88.0631         | 158.0924       | 79.5498          |                |                  | 159.1002  | 80.0538           | 160.1081  | 80.5577           |   | 1  |

Monoisotopic mass of neutral peptide Mr(calc): 1863.1418

Fixed modifications: Carbamidomethyl (C) (apply to specified residues or termini only)

Variable modifications:

R4 : Trimethyl (R)

Ions Score: 48 Expect: 0.0049

Matches : 27/269 fragment ions using 42 most intense peaks ([help](#))

# Mascot Search Results: Peptide View

(K)VL(Rme3)DNIQGITKPAIR

MS/MS Fragmentation of **KVLRDNIQGITKPAIRR**

Found in **sp|P62806|H4\_MOUSE** in **fgcz\_10090**, Histone H4 OS=Mus musculus GN=Hist1h4a

Match to Query 2705: 1991.211420 from(399.249560,5+) intensity(223752.4100) scans(3629) rtinseconds(2158.2574) index(2061)

Title: 2062: Scan 3629 (rt=35.971) [s:\p749\Proteomics\ORBI\_2\andreamizzi\_20110310\_sperm\_trypsin\_chymo\_AspN\_ETD\_CID\20110310\_05\_rep\_ON7.RAW]

Data file \\fgcz-ms.uzh.ch\p749\Proteomics\ORBI\_2\andreamizzi\_20110310\_sperm\_trypsin\_chymo\_AspN\_ETD\_CID\mgf\_low\_res\_MS2\_nomerge\20110310\_05\_rep\_ON7.mgf

Click mouse within plot area to zoom in by factor of two about that point

Or, Plot from  to  Da

Label all possible matches  Label matches used for scoring

Show Y-axis

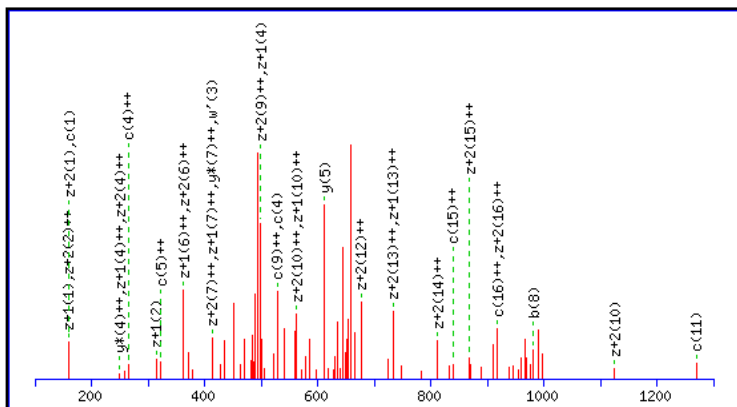

| #  | b         | b <sup>++</sup> | b <sup>+</sup> | b <sup>+++</sup> | b <sup>0</sup> | b <sup>0++</sup> | c         | c <sup>++</sup> | Seq. | w         | w <sup>+</sup> | y         | y <sup>++</sup> | y <sup>+</sup> | y <sup>+++</sup> | y <sup>0</sup> | y <sup>0++</sup> | z+1       | z+1 <sup>++</sup> | z+2       | z+2 <sup>++</sup> | #  |
|----|-----------|-----------------|----------------|------------------|----------------|------------------|-----------|-----------------|------|-----------|----------------|-----------|-----------------|----------------|------------------|----------------|------------------|-----------|-------------------|-----------|-------------------|----|
| 1  | 143.1179  | 72.0626         | 126.0913       | 63.5493          |                |                  | 160.1444  | 80.5759         | K    |           |                |           |                 |                |                  |                |                  |           |                   |           |                   | 17 |
| 2  | 242.1863  | 121.5968        | 225.1598       | 113.0835         |                |                  | 259.2129  | 130.1101        | V    | 1819.0661 |                | 1850.1083 | 925.5578        | 1833.0817      | 917.0445         | 1832.0977      | 916.5525         | 1834.0896 | 917.5484          | 1835.0974 | 918.0523          | 16 |
| 3  | 355.2704  | 178.1388        | 338.2438       | 169.6255         |                |                  | 372.2969  | 186.6521        | L    | 1691.9664 |                | 1751.0399 | 876.0236        | 1734.0133      | 867.5103         | 1733.0293      | 867.0183         | 1735.0211 | 868.0142          | 1736.0290 | 868.5181          | 15 |
| 4  | 511.3715  | 256.1894        | 494.3449       | 247.6761         |                |                  | 528.3980  | 264.7027        | R    | 1535.8653 |                | 1637.9558 | 819.4815        | 1620.9292      | 810.9683         | 1619.9452      | 810.4763         | 1621.9371 | 811.4722          | 1622.9449 | 811.9761          | 14 |
| 5  | 626.3984  | 313.7028        | 609.3719       | 305.1896         | 608.3879       | 304.6976         | 643.4250  | 322.2161        | D    | 1420.8383 |                | 1481.8547 | 741.4310        | 1464.8281      | 732.9177         | 1463.8441      | 732.4257         | 1465.8360 | 733.4216          | 1466.8438 | 733.9255          | 13 |
| 6  | 740.4413  | 370.7243        | 723.4148       | 362.2110         | 722.4308       | 361.7190         | 757.4679  | 379.2376        | N    | 1306.7954 |                | 1366.8277 | 683.9175        | 1349.8012      | 675.4042         | 1348.8172      | 674.9122         | 1350.8090 | 675.9081          | 1351.8168 | 676.4121          | 12 |
| 7  | 853.5254  | 427.2663        | 836.4989       | 418.7531         | 835.5148       | 418.2611         | 870.5520  | 435.7796        | I    | 1207.7270 | 1221.7426      | 1252.7848 | 626.8960        | 1235.7583      | 618.3828         | 1234.7743      | 617.8908         | 1236.7661 | 618.8867          | 1237.7739 | 619.3906          | 11 |
| 8  | 981.5840  | 491.2956        | 964.5574       | 482.7824         | 963.5734       | 482.2904         | 998.6105  | 499.8089        | Q    | 1065.6527 |                | 1139.7008 | 570.3540        | 1122.6742      | 561.8407         | 1121.6902      | 561.3487         | 1123.6820 | 562.3447          | 1124.6899 | 562.8486          | 10 |
| 9  | 1038.6055 | 519.8064        | 1021.5789      | 511.2931         | 1020.5949      | 510.8011         | 1055.6320 | 528.3196        | G    |           |                | 1011.6422 | 506.3247        | 994.6156       | 497.8115         | 993.6316       | 497.3194         | 995.6235  | 498.3154          | 996.6313  | 498.8193          | 9  |
| 10 | 1151.6895 | 576.3484        | 1134.6630      | 567.8351         | 1133.6790      | 567.3431         | 1168.7161 | 584.8617        | I    | 909.5629  | 923.5785       | 954.6207  | 477.8140        | 937.5942       | 469.3007         | 936.6101       | 468.8087         | 938.6020  | 469.8046          | 939.6098  | 470.3085          | 8  |
| 11 | 1252.7372 | 626.8722        | 1235.7106      | 618.3590         | 1234.7266      | 617.8670         | 1269.7637 | 635.3855        | T    | 808.5152  | 810.4944       | 841.5366  | 421.2720        | 824.5101       | 412.7587         | 823.5261       | 412.2667         | 825.5179  | 413.2626          | 826.5257  | 413.7665          | 7  |
| 12 | 1380.8322 | 690.9197        | 1363.8056      | 682.4064         | 1362.8216      | 681.9144         | 1397.8587 | 699.4330        | K    | 666.4046  |                | 740.4890  | 370.7481        | 723.4624       | 362.2348         |                | 724.4702         | 362.7388  | 725.4781          | 363.2427  | 363.7466          | 6  |
| 13 | 1477.8849 | 739.4461        | 1460.8584      | 730.9328         | 1459.8744      | 730.4408         | 1494.9115 | 747.9594        | P    | 569.3518  |                | 612.3940  | 306.7006        | 595.3675       | 298.1874         |                | 596.3753         | 298.6913  | 597.3831          | 299.1952  | 299.6991          | 5  |
| 14 | 1548.9220 | 774.9647        | 1531.8955      | 766.4514         | 1530.9115      | 765.9594         | 1565.9486 | 783.4779        | A    |           |                | 515.3412  | 258.1743        | 498.3147       | 249.6610         |                | 499.3225         | 250.1649  | 499.6688          | 250.1688  | 250.6688          | 4  |
| 15 | 1662.0061 | 831.5067        | 1644.9796      | 822.9934         | 1643.9955      | 822.5014         | 1679.0327 | 840.0200        | I    | 399.2463  | 413.2619       | 444.3041  | 222.6557        | 427.2776       | 214.1424         |                | 428.2854         | 214.6463  | 429.2932          | 215.1503  | 215.6503          | 3  |
| 16 | 1818.1072 | 909.5572        | 1801.0807      | 901.0440         | 1800.0966      | 900.5520         | 1835.1338 | 918.0705        | R    | 229.1295  |                | 331.2201  | 166.1137        | 314.1935       | 157.6004         |                | 315.2013         | 158.1043  | 316.2092          | 158.6082  | 159.1081          | 2  |
| 17 |           |                 |                |                  |                |                  |           |                 | R    | 73.0284   |                | 175.1190  | 88.0631         | 158.0924       | 79.5498          |                | 159.1002         | 80.0538   | 160.1081          | 80.5577   | 81.0577           | 1  |

Monoisotopic mass of neutral peptide Mr(calc): 1991.2116

Fixed modifications: Carbamidomethyl (C) (apply to specified residues or termini only)

Variable modifications:

K1 : Methyl\_KR (KR)

Ions Score: 82 Expect: 8e-06

Matches : 34/286 fragment ions using 29 most intense peaks ([help](#))

# Mascot Search Results: Peptide View

Kme1VLRDNIQGITKPAIRR

MS/MS Fragmentation of **KVLRDNIQGITKPAIRR**

Found in [sp|P62806|H4\\_MOUSE](#) in [fgcz\\_10090](#), Histone H4 OS=Mus musculus GN=Hist1h4a

Match to Query 4236: 2005.227536 from(502.314160,4+) intensity(262872.3100) scans(3091) rtinseconds(2250.3844) index(4371)

Title: 1345: Scan 3091 (rt=37.5064) [s:\p749\Proteomics\ORBI\_2\andreamizzi\_20110310\_sperm\_trypsin\_chymo\_AspN\_ETD\_CID\20110311\_34\_NaCl\_trypsin\_SCX\_FT.RAW]

Data file Y:\p749\Proteomics\Mascotmgf50\_20110426\_sperm\_rerun\_trypsin\_2nd\_ETD\_run\_NaCl\_SCX\mascot\_daemon\_merge.mgf

Click mouse within plot area to zoom in by factor of two about that point

Or,  200 to  Da

Label all possible matches  Label matches used for scoring

Show Y-axis

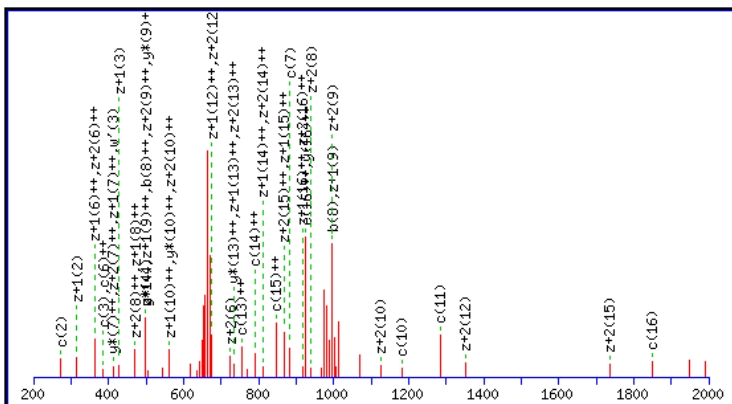

| #  | b         | b <sup>++</sup> | b <sup>+</sup> | b <sup>++</sup> | b <sup>0</sup> | b <sup>++</sup> | c         | c <sup>+</sup> | Seq. | w         | w'        | y         | y <sup>++</sup> | y <sup>+</sup> | y <sup>++</sup> | y <sup>0</sup> | y <sup>0</sup> | z+1       | z+1 <sup>++</sup> | z+2       | z+2 <sup>++</sup> | #        |    |
|----|-----------|-----------------|----------------|-----------------|----------------|-----------------|-----------|----------------|------|-----------|-----------|-----------|-----------------|----------------|-----------------|----------------|----------------|-----------|-------------------|-----------|-------------------|----------|----|
| 1  | 157.1335  | 79.0704         | 140.1070       | 70.5571         |                |                 | 174.1601  | 87.5837        | K    |           |           |           |                 |                |                 |                |                |           |                   |           |                   |          | 17 |
| 2  | 256.2020  | 128.6046        | 239.1754       | 120.0913        |                |                 | 273.2285  | 137.1179       | V    | 1819.0661 |           | 1850.1083 | 925.5578        | 1833.0817      | 917.0445        | 1832.0977      | 916.5525       | 1834.0896 | 917.5484          | 1835.0974 | 918.0523          | 918.5523 | 16 |
| 3  | 369.2860  | 185.1466        | 352.2595       | 176.6334        |                |                 | 386.3126  | 193.6599       | L    | 1691.9664 |           | 1751.0399 | 876.0236        | 1734.0133      | 867.5103        | 1733.0293      | 867.0183       | 1735.0211 | 868.0142          | 1736.0290 | 868.5181          | 868.5181 | 15 |
| 4  | 525.3871  | 263.1972        | 508.3606       | 254.6839        |                |                 | 542.4137  | 271.7105       | R    | 1535.8653 |           | 1637.9558 | 819.4815        | 1620.9292      | 810.9683        | 1619.9452      | 810.4763       | 1621.9371 | 811.4722          | 1622.9449 | 811.9761          | 811.9761 | 14 |
| 5  | 640.4141  | 320.7107        | 623.3875       | 312.1974        |                |                 | 657.4406  | 329.2239       | D    | 1420.8383 |           | 1481.8547 | 741.4310        | 1464.8281      | 732.9177        | 1463.8441      | 732.4257       | 1465.8360 | 733.4216          | 1466.8438 | 733.9253          | 733.9253 | 13 |
| 6  | 754.4570  | 377.7321        | 737.4304       | 369.2189        |                |                 | 771.4835  | 386.2454       | N    | 1306.7954 |           | 1366.8277 | 683.9175        | 1349.8012      | 675.4042        | 1348.8172      | 674.9122       | 1350.8090 | 675.9081          | 1351.8168 | 676.4121          | 676.4121 | 12 |
| 7  | 867.5411  | 434.2742        | 850.5145       | 425.7609        |                |                 | 884.5676  | 442.7874       | I    | 1207.7270 | 1221.7426 | 1252.7848 | 626.8960        | 1235.7583      | 618.3828        | 1234.7743      | 617.8908       | 1236.7661 | 618.8867          | 1237.7739 | 619.3906          | 619.3906 | 11 |
| 8  | 995.5996  | 498.3035        | 978.5731       | 489.7902        |                |                 | 1012.6262 | 506.8167       | Q    | 1065.6527 |           | 1139.7008 | 570.3540        | 1122.6742      | 561.9407        | 1121.6902      | 561.3487       | 1123.6820 | 562.3447          | 1124.6899 | 562.8486          | 562.8486 | 10 |
| 9  | 1052.6211 | 526.8142        | 1035.5946      | 518.3009        |                |                 | 1069.6477 | 535.3275       | G    |           |           | 1011.6422 | 506.3247        | 994.6156       | 497.8115        | 993.6316       | 497.3194       | 995.6235  | 996.3154          | 996.6313  | 996.8193          | 996.8193 | 9  |
| 10 | 1165.7052 | 583.3562        | 1148.6786      | 574.8429        |                |                 | 1182.7317 | 591.8695       | T    | 909.5629  | 923.5785  | 954.6207  | 477.8140        | 937.5942       | 469.3007        | 936.6101       | 468.8087       | 938.6020  | 469.8046          | 939.6098  | 470.3085          | 470.3085 | 8  |
| 11 | 1266.7528 | 633.8801        | 1249.7263      | 625.3668        |                |                 | 1283.7794 | 642.3933       | Y    | 808.5152  | 810.4944  | 841.5366  | 421.2720        | 824.5101       | 412.7587        | 823.5261       | 412.2667       | 825.5179  | 413.2626          | 826.5257  | 413.7665          | 413.7665 | 7  |
| 12 | 1394.8478 | 697.9275        | 1377.8213      | 689.4143        |                |                 | 1411.8744 | 706.4408       | K    | 666.4046  |           | 740.4890  | 370.7481        | 723.4624       | 362.2348        |                | 724.4702       | 362.7388  | 723.4781          | 363.2427  | 363.2427          | 363.2427 | 6  |
| 13 | 1491.9006 | 746.4539        | 1474.8740      | 737.9407        |                |                 | 1508.9271 | 754.9672       | P    | 569.3518  |           | 612.3940  | 306.7006        | 595.3675       | 298.1874        |                | 596.3753       | 298.6913  | 299.3831          | 299.1952  | 299.1952          | 299.1952 | 5  |
| 14 | 1562.9377 | 781.9725        | 1545.9111      | 773.4592        |                |                 | 1579.9642 | 790.4858       | A    |           |           | 515.3412  | 258.1743        | 498.3147       | 249.6610        |                | 499.3225       | 250.1649  | 500.3303          | 250.6688  | 250.6688          | 250.6688 | 4  |
| 15 | 1676.0218 | 838.5145        | 1658.9952      | 830.0012        |                |                 | 1693.0483 | 847.0278       | I    | 399.2463  | 413.2619  | 444.3041  | 222.6557        | 427.2776       | 214.1424        |                | 428.2854       | 214.6463  | 429.2932          | 215.1503  | 215.1503          | 215.1503 | 3  |
| 16 | 1832.1229 | 916.5651        | 1815.0963      | 908.0518        |                |                 | 1849.1494 | 925.0783       | R    | 229.1295  |           | 331.2201  | 166.1137        | 314.1935       | 157.6004        |                | 315.2013       | 158.1043  | 316.2092          | 158.6082  | 158.6082          | 158.6082 | 2  |
| 17 |           |                 |                |                 |                |                 |           |                | R    | 73.0284   |           | 175.1190  | 88.0631         | 158.0924       | 79.5498         |                | 159.1002       | 80.0538   | 160.1081          | 80.5577   | 80.5577           | 80.5577  | 1  |

Monoisotopic mass of neutral peptide Mr(caLc): 2005.2272

Fixed modifications: Carbamidomethyl (C) (apply to specified residues or termini only)

Variable modifications:

K1 : Dimethyl KR (KR)

Ions Score: 84 Expect: 4.6e-06

Matches : 50/286 fragment ions using 39 most intense peaks ([help](#))

# Mascot Search Results: Peptide View

Kme2VLRDNIQGITKPAIRR

MS/MS Fragmentation of **KVLRDNIQGITKPAIRR**

Found in **sp|P62806|H4\_MOUSE** in **fgcz\_10090**, Histone H4 OS=Mus musculus GN=Hist1h4a

Match to Query 3391: 2019.244170 from(404.856110,5+) intensity(155560.1600) scans(4136) rtinseconds(2257.4328) index(2835)

Title: 2836: Scan 4136 (rt=37.6239) [s:\p749\Proteomics\ORBI\_2\andreamizzi\_20110517\_sperm\_trypsin\_GluC\_ETD\_CID\20110517\_02\_NaCl\_2.RAW]

Data file 20110517\_02\_NaCl\_2.mgf

Click mouse within plot area to zoom in by factor of two about that point

Or,   to  Da

Label all possible matches  Label matches used for scoring

Show Y-axis

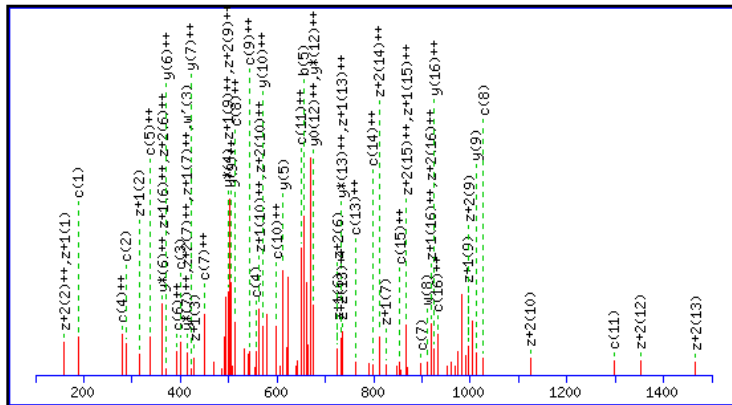

| #  | b               | b <sup>++</sup> | b <sup>*</sup> | b <sup>***</sup> | b <sup>0</sup> | b <sup>0++</sup> | c                | c <sup>++</sup> | Seq. | w               | w <sup>*</sup>  | y                | y <sup>++</sup> | y <sup>*</sup>  | y <sup>***</sup> | y <sup>0</sup> | y <sup>0++</sup> | z+1             | z+1 <sup>++</sup> | z+2              | z+2 <sup>++</sup> | #                |    |
|----|-----------------|-----------------|----------------|------------------|----------------|------------------|------------------|-----------------|------|-----------------|-----------------|------------------|-----------------|-----------------|------------------|----------------|------------------|-----------------|-------------------|------------------|-------------------|------------------|----|
| 1  | 171.1492        | 86.0782         | 154.1226       | 77.5650          |                |                  | <b>188.1757</b>  | 94.5915         | K    |                 |                 |                  |                 |                 |                  |                |                  |                 |                   |                  |                   |                  | 17 |
| 2  | 270.2176        | 135.6124        | 253.1911       | 127.0992         |                |                  | <b>287.2442</b>  | 144.1257        | V    | 1819.0661       |                 | 1850.1083        | <b>925.5578</b> | 1833.0817       | 917.0445         | 1832.0977      | 916.5525         | 1834.0896       | <b>917.5484</b>   | 1835.0974        | <b>918.0523</b>   | <b>918.523</b>   | 16 |
| 3  | 383.3017        | 192.1545        | 366.2751       | 183.6412         |                |                  | <b>400.3282</b>  | 200.6677        | L    | 1691.9664       |                 | 1751.0399        | 876.0236        | 1734.0133       | 867.5103         | 1733.0293      | 867.0183         | 1735.0211       | <b>868.0142</b>   | 1736.0290        | <b>868.5181</b>   | <b>868.981</b>   | 15 |
| 4  | 539.4028        | 270.2050        | 522.3762       | 261.6918         |                |                  | <b>556.4293</b>  | <b>278.7183</b> | R    | 1535.8653       |                 | 1637.9558        | 918.4815        | 1620.9292       | 810.9683         | 1619.9452      | 810.4763         | 1621.9371       | 811.4722          | 1622.9449        | <b>811.9761</b>   | <b>811.9761</b>  | 14 |
| 5  | <b>654.4297</b> | 327.7185        | 637.4032       | 319.2052         | 636.4192       | 318.7132         | 671.4563         | <b>326.2318</b> | D    | 1420.8383       |                 | 1481.8547        | 741.4310        | 1464.8281       | <b>732.9177</b>  | 1463.8441      | 732.4257         | 1465.8360       | <b>733.4216</b>   | <b>1466.8438</b> | <b>733.9255</b>   | <b>733.9255</b>  | 13 |
| 6  | 768.4726        | 384.7400        | 751.4461       | 376.2267         | 750.4621       | 375.7347         | 785.4992         | <b>393.2532</b> | N    | 1306.7954       |                 | 1366.8277        | 683.9175        | 1349.8012       | <b>675.4042</b>  | 1348.8172      | <b>674.9122</b>  | 1350.8090       | 675.9081          | <b>1351.8168</b> | 676.4121          | <b>1351.8168</b> | 12 |
| 7  | 881.5567        | 441.2820        | 864.5302       | 432.7687         | 863.5461       | 432.2767         | <b>898.5833</b>  | <b>449.7953</b> | I    | 1207.7270       | 1221.7426       | 1252.7848        | 626.8960        | 1235.7583       | 618.3828         | 1234.7743      | 617.8908         | 1236.7661       | 618.8867          | 1237.7739        | 619.3906          | 11               |    |
| 8  | 1009.6153       | 505.3113        | 992.5887       | 496.7980         | 991.6047       | 496.3060         | <b>1026.6418</b> | <b>513.8246</b> | Q    | 1065.6527       |                 | 1139.7008        | <b>570.3540</b> | 1122.6742       | 561.8407         | 1121.6902      | 561.3487         | 1123.6820       | <b>562.3447</b>   | <b>1124.6899</b> | <b>562.8486</b>   | <b>562.8486</b>  | 10 |
| 9  | 1066.6368       | 533.8220        | 1049.6102      | 525.3087         | 1048.6262      | 524.8167         | 1083.6633        | <b>542.3353</b> | G    |                 |                 | <b>1011.6422</b> | <b>506.3247</b> | 994.6156        | 497.8115         | 993.6316       | 497.3194         | <b>995.6235</b> | <b>498.3154</b>   | <b>996.6313</b>  | <b>498.8193</b>   | <b>498.8193</b>  | 9  |
| 10 | 1179.7208       | 590.3640        | 1162.6943      | 581.8508         | 1161.7103      | 581.3588         | 1196.7474        | <b>598.8773</b> | I    | <b>909.5629</b> | 923.5785        | 954.6207         | 477.8140        | 937.5942        | 469.3007         | 936.6101       | 468.8087         | 938.6020        | 469.8046          | 939.6098         | 470.3085          | <b>8</b>         |    |
| 11 | 1280.7685       | 640.8879        | 1263.7419      | 632.3746         | 1262.7579      | 631.8826         | <b>1297.7950</b> | <b>649.4012</b> | T    | 808.5152        | 810.4944        | 841.5366         | <b>421.2720</b> | 824.5101        | <b>412.7587</b>  | 823.5261       | <b>412.2667</b>  | <b>825.5179</b> | <b>413.2626</b>   | 826.5257         | <b>413.7665</b>   | <b>413.7665</b>  | 7  |
| 12 | 1408.8635       | 704.9354        | 1391.8369      | 696.4221         | 1390.8529      | 695.9301         | 1425.8900        | 713.4486        | K    | 666.4046        |                 | 740.4890         | <b>370.7481</b> | 723.4624        | <b>362.2348</b>  |                |                  | <b>724.4702</b> | <b>362.7388</b>   | <b>725.4781</b>  | <b>363.2427</b>   | <b>363.2427</b>  | 6  |
| 13 | 1505.9162       | 753.4618        | 1488.8897      | 744.9485         | 1487.9057      | 744.4565         | 1522.9428        | <b>761.9750</b> | P    | 569.3518        |                 | <b>612.3940</b>  | 630.7006        | 595.3675        | 298.1874         |                |                  | 596.3753        | 298.6913          | 597.3831         | 299.1952          | <b>5</b>         |    |
| 14 | 1576.9533       | 788.9803        | 1559.9268      | 780.4670         | 1558.9438      | 779.9750         | 1593.9799        | <b>797.4936</b> | A    |                 |                 | 515.3412         | 258.1743        | <b>498.3147</b> | 249.6610         |                |                  | 499.3225        | 250.1649          | 500.3303         | 250.6688          | <b>4</b>         |    |
| 15 | 1690.0374       | 845.5223        | 1673.0109      | 837.0091         | 1672.0268      | 836.5171         | 1707.0640        | <b>854.0356</b> | I    | 399.2463        | <b>413.2619</b> | 444.3041         | 222.6557        | 427.2776        | 214.1424         |                |                  | <b>428.2854</b> | 214.6463          | 429.2932         | 215.1503          | <b>3</b>         |    |
| 16 | 1846.1385       | 923.5729        | 1829.1120      | 915.0596         | 1828.1279      | 914.5676         | 1863.1651        | <b>932.0862</b> | R    | 229.1295        |                 | 331.2201         | 166.1137        | 314.1935        | 157.6004         |                |                  | <b>315.2013</b> | 158.1043          | 316.2092         | <b>158.6082</b>   | <b>158.6082</b>  | 2  |
| 17 |                 |                 |                |                  |                |                  |                  |                 | R    | 73.0284         |                 | 175.1190         | 88.0631         | 158.0924        | 79.5498          |                |                  | <b>159.1002</b> | 80.0538           | 160.1081         | 80.5577           | <b>1</b>         |    |

**Monoisotopic mass of neutral peptide Mr(calc):** 2019.2429

**Fixed modifications:** Carbamidomethyl (C) (apply to specified residues or termini only)

**Variable modifications:**

**K1** : Trimethyl (K)

**Ions Score:** 70 **Expect:** 6.7e-05

**Matches** : 62/286 fragment ions using 77 most intense peaks ([help](#))

# Mascot Search Results: Peptide View

Kme3VLRDNIQGITKPAIRR

MS/MS Fragmentation of **KVLRDNIQGITKPAIRR**

Found in **sp|P62806|H4\_MOUSE** in **fgcz\_10090**, Histone H4 OS=Mus musculus GN=Hist1h4a

Match to Query 2758: 2019.241670 from(404.855610,5+) intensity(689196.2500) scans(3813) rtinseconds(2319.3631) index(2457)

Title: 2458: Scan 3813 (rt=38.6561) [s:\p749\Proteomics\ORBI\_2\andreamizzi\_20110517\_sperm\_trypsin\_GluC\_ETD\_CID\20110519\_01\_NaCl\_ziptipped\_1.RAW]

Data file 20110519\_01\_NaCl\_ziptipped\_1.mgf

Click mouse within plot area to zoom in by factor of two about that point

Or, Plot from  to  Da

Label all possible matches  Label matches used for scoring

Show Y-axis

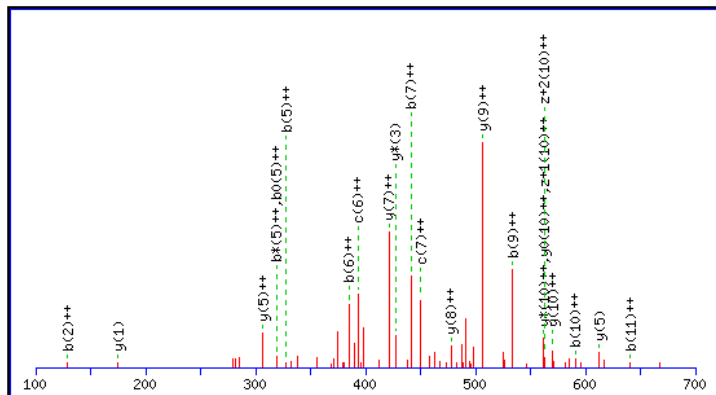

| #  | b         | b <sup>++</sup> | b <sup>+</sup> | b <sup>+++</sup> | b <sup>0</sup> | b <sup>0++</sup> | c         | c <sup>++</sup> | Seq.     | w         | w'        | y               | y <sup>++</sup> | y <sup>+</sup>  | y <sup>+++</sup> | y <sup>0</sup> | y <sup>0++</sup> | z+1       | z+1 <sup>++</sup> | z+2       | z+2 <sup>++</sup> | #         |
|----|-----------|-----------------|----------------|------------------|----------------|------------------|-----------|-----------------|----------|-----------|-----------|-----------------|-----------------|-----------------|------------------|----------------|------------------|-----------|-------------------|-----------|-------------------|-----------|
| 1  | 157.1335  | 79.0704         | 140.1070       | 70.5571          |                |                  | 174.1601  | 87.5837         | <b>K</b> |           |           |                 |                 |                 |                  |                |                  |           |                   |           |                   | 17        |
| 2  | 256.2020  | <b>126.6046</b> | 239.1754       | 120.0913         |                |                  | 273.2285  | 137.1179        | <b>V</b> | 1833.0817 |           | 1864.1239       | 932.5656        | 1847.0974       | 924.0523         | 1846.1134      | 923.5603         | 1848.1052 | 924.5562          | 1849.1130 | 925.0602          | <b>16</b> |
| 3  | 369.2860  | 185.1466        | 352.2595       | 176.6334         |                |                  | 386.3126  | 193.6599        | <b>L</b> | 1705.9820 |           | 1765.0555       | 883.0314        | 1748.0290       | 874.5181         | 1747.0449      | 874.0261         | 1749.0368 | 875.0220          | 1750.0446 | 875.5259          | <b>15</b> |
| 4  | 539.4028  | 270.2050        | 522.3762       | 261.6918         |                |                  | 556.4293  | 278.7183        | <b>R</b> | 1535.8653 |           | 1651.9714       | 826.4894        | 1634.9449       | 817.9761         | 1633.9609      | 817.4841         | 1635.9527 | 818.4800          | 1636.9605 | 818.9839          | <b>14</b> |
| 5  | 654.4297  | <b>327.7185</b> | 637.4032       | <b>319.2052</b>  | 636.4192       | <b>318.7132</b>  | 671.4563  | 336.2318        | <b>D</b> | 1420.8383 |           | 1481.8547       | 741.4310        | 1464.8281       | 732.9177         | 1463.8441      | 732.4257         | 1465.8360 | 733.4216          | 1466.8438 | 733.9255          | <b>13</b> |
| 6  | 768.4726  | <b>384.7400</b> | 751.4461       | 376.2267         | 750.4621       | 375.7347         | 785.4992  | <b>393.2532</b> | <b>N</b> | 1306.7954 |           | 1366.8277       | 683.9175        | 1349.8012       | 675.4042         | 1348.8172      | 674.9122         | 1350.8090 | 675.9081          | 1351.8168 | 676.4121          | <b>12</b> |
| 7  | 881.5567  | <b>441.2820</b> | 864.5302       | 432.7687         | 863.5461       | 432.2767         | 898.5833  | <b>449.7953</b> | <b>I</b> | 1207.7270 | 1221.7426 | 1252.7848       | 626.8960        | 1235.7583       | 618.3828         | 1234.7743      | 617.8908         | 1236.7661 | 618.8867          | 1237.7739 | 619.3906          | <b>11</b> |
| 8  | 1009.6153 | 505.3113        | 992.5887       | 496.7980         | 991.6047       | 496.3060         | 1026.6418 | 513.8246        | <b>Q</b> | 1065.6527 |           | 1139.7008       | <b>570.3540</b> | 1122.6742       | <b>561.8407</b>  | 1121.6902      | <b>561.3487</b>  | 1123.6820 | <b>562.3447</b>   | 1124.6899 | <b>562.8486</b>   | <b>10</b> |
| 9  | 1066.6368 | <b>533.8220</b> | 1049.6102      | 525.3087         | 1048.6262      | 524.8167         | 1083.6633 | 542.3353        | <b>G</b> |           |           | 1011.6422       | <b>506.3247</b> | 994.6156        | 497.8115         | 993.6316       | 497.3194         | 995.6235  | 498.3154          | 996.6313  | 498.8193          | <b>9</b>  |
| 10 | 1179.7208 | <b>590.3640</b> | 1162.6943      | 581.8508         | 1161.7103      | 581.3588         | 1196.7474 | 598.8773        | <b>I</b> | 909.5629  | 923.5785  | 954.6207        | <b>477.8140</b> | 937.5942        | 469.3007         | 936.6101       | 468.8087         | 938.6020  | 469.8046          | 939.6098  | 470.3085          | <b>8</b>  |
| 11 | 1280.7685 | <b>640.8879</b> | 1263.7419      | 632.3746         | 1262.7579      | 631.8826         | 1297.7950 | 649.4012        | <b>T</b> | 808.5152  | 810.4944  | 841.5366        | <b>421.2720</b> | 824.5101        | 412.7587         | 823.5261       | 412.2667         | 825.5179  | 413.2626          | 826.5257  | 413.7665          | <b>7</b>  |
| 12 | 1408.8635 | 704.9354        | 1391.8369      | 696.4221         | 1390.8529      | 695.9301         | 1425.8900 | 713.4486        | <b>K</b> | 666.4046  |           | 740.4890        | 370.7481        | 723.4624        | 362.2348         |                |                  | 724.4702  | 362.7388          | 725.4781  | 363.2427          | <b>6</b>  |
| 13 | 1505.9162 | 753.4618        | 1488.8897      | 744.9485         | 1487.9057      | 744.4565         | 1522.9428 | 761.9750        | <b>P</b> | 569.3518  |           | <b>612.3940</b> | <b>306.7006</b> | 595.3675        | 298.1874         |                |                  | 596.3753  | 298.6913          | 597.3831  | 299.1952          | <b>5</b>  |
| 14 | 1576.9533 | 788.9803        | 1559.9268      | 780.4670         | 1558.9428      | 779.9750         | 1593.9799 | 797.4936        | <b>A</b> |           |           | 515.3412        | 258.1743        | 498.3147        | 249.6610         |                |                  | 499.3225  | 250.1649          | 500.3303  | 250.6688          | <b>4</b>  |
| 15 | 1690.0374 | 845.5223        | 1673.0109      | 837.0091         | 1672.0268      | 836.5171         | 1707.0640 | 854.0356        | <b>I</b> | 399.2463  | 413.2619  | 444.3041        | 222.6557        | <b>427.2776</b> | 214.1424         |                |                  | 428.2854  | 214.6463          | 429.2932  | 215.1503          | <b>3</b>  |
| 16 | 1846.1385 | 923.5729        | 1829.1120      | 915.0596         | 1828.1279      | 914.5676         | 1863.1651 | 932.0862        | <b>R</b> | 229.1295  |           | 331.2201        | 166.1137        | 314.1935        | 157.6004         |                |                  | 315.2013  | 158.1043          | 316.2092  | 158.6082          | <b>2</b>  |
| 17 |           |                 |                |                  |                |                  |           |                 | <b>R</b> | 73.0284   |           | <b>175.1190</b> | 88.0631         | 158.0924        | 79.5498          |                |                  | 159.1002  | 80.0538           | 160.1081  | 80.5577           | <b>1</b>  |

Monoisotopic mass of neutral peptide Mr(calc): 2019.2429

Fixed modifications: Carbamidomethyl (C) (apply to specified residues or termini only)

Variable modifications:

K1 : Dimethyl\_KR (KR)

R4 : Methyl\_KR (KR)

Ions Score: 44 Expect: 0.041

Matches : 23/286 fragment ions using 28 most intense peaks ([help](#))

# Mascot Search Results: Peptide View

Kme2VLRme1DNIQGITKPAIRR

MS/MS Fragmentation of **KVLRDNIQGITKPAIRR**

Found in **sp|P62806|H4\_MOUSE** in **fgcz\_10090**, Histone H4 OS=Mus musculus GN=Hist1h4a

Match to Query 2326: 2019.242820 from(404.855840,5+) intensity(838191.9400) scans(3135) rtinseconds(2144.1266) index(1666)

Title: 1667. Scan 3135 (rt=35.7354) [s:\p749\Proteomics\ORBI\_2\andreamizzi\_20110310\_sperm\_trypsin\_chymo\_AspN\_ETD\_CID\20110310\_04\_rep\_2h7.RAW]

Data file W\fgcz-ms.uzh.ch\p749\Proteomics\ORBI\_2\andreamizzi\_20110310\_sperm\_trypsin\_chymo\_AspN\_ETD\_CID\mgf\_low\_res\_MS2\_nomerge\20110310\_04\_rep\_2h7.mgf

Click mouse within plot area to zoom in by factor of two about that point

Or, Plot from  to  Da

Label all possible matches  Label matches used for scoring

Show Y-axis

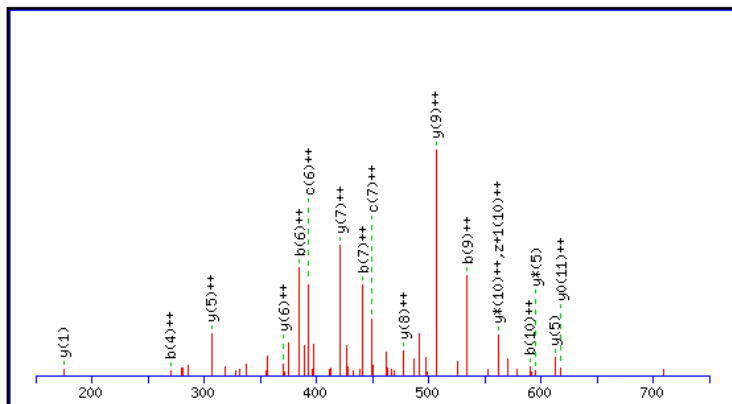

| #  | b         | b <sup>++</sup> | b <sup>*</sup> | b <sup>+++</sup> | b <sup>0</sup> | b <sup>0++</sup> | c         | c <sup>++</sup> | Seq. | w         | w'        | y         | y <sup>++</sup> | y <sup>*</sup> | y <sup>+++</sup> | y <sup>0</sup> | y <sup>0++</sup> | z+1       | z+1 <sup>++</sup> | z+2       | z+2 <sup>++</sup> | #  |    |
|----|-----------|-----------------|----------------|------------------|----------------|------------------|-----------|-----------------|------|-----------|-----------|-----------|-----------------|----------------|------------------|----------------|------------------|-----------|-------------------|-----------|-------------------|----|----|
| 1  | 129.1022  | 65.0548         | 112.0757       | 56.5415          |                |                  | 146.1288  | 73.5680         | K    |           |           |           |                 |                |                  |                |                  |           |                   |           |                   |    | 17 |
| 2  | 228.1707  | 114.5890        | 211.1441       | 106.0757         |                |                  | 245.1972  | 123.1022        | V    | 1861.1130 |           | 1892.1552 | 946.5813        | 1875.1287      | 938.0680         | 1874.1447      | 937.5760         | 1876.1365 | 938.5719          | 1877.1443 | 939.0758          | 16 |    |
| 3  | 341.2547  | 171.1310        | 324.2282       | 162.6177         |                |                  | 358.2813  | 179.6443        | L    | 1734.0133 |           | 1793.0868 | 897.0470        | 1776.0603      | 888.5338         | 1775.0762      | 888.0418         | 1777.0681 | 889.0377          | 1778.0759 | 889.5416          | 15 |    |
| 4  | 539.4028  | 270.2050        | 522.3762       | 261.6918         |                |                  | 556.4293  | 278.7183        | R    | 1535.8653 |           | 1680.0027 | 840.5050        | 1662.9762      | 831.9917         | 1661.9922      | 831.4997         | 1663.9840 | 832.4956          | 1664.9918 | 832.9996          | 14 |    |
| 5  | 654.4297  | 327.7185        | 637.4032       | 319.2052         | 636.4192       | 318.7132         | 671.4563  | 336.2318        | D    | 1420.8383 |           | 1481.8547 | 741.4310        | 1464.8281      | 732.9177         | 1463.8441      | 732.4257         | 1465.8360 | 733.4216          | 1466.8438 | 733.9253          | 13 |    |
| 6  | 768.4726  | 384.7400        | 751.4461       | 376.2267         | 750.4621       | 375.7347         | 785.4992  | 393.2532        | N    | 1306.7954 |           | 1366.8277 | 683.9175        | 1349.8012      | 675.4042         | 1348.8172      | 674.9122         | 1350.8090 | 675.9081          | 1351.8168 | 676.4121          | 12 |    |
| 7  | 881.5567  | 441.2820        | 864.5302       | 432.7687         | 863.5461       | 432.2767         | 898.5833  | 449.7953        | I    | 1207.7270 | 1221.7426 | 1252.7848 | 626.8960        | 1235.7583      | 618.3828         | 1234.7743      | 617.8908         | 1236.7661 | 618.8867          | 1237.7739 | 619.3906          | 11 |    |
| 8  | 1009.6153 | 505.3113        | 992.5887       | 496.7980         | 991.6047       | 496.3060         | 1026.6418 | 513.8246        | Q    | 1065.6527 |           | 1139.7008 | 570.3540        | 1122.6742      | 561.8407         | 1121.6902      | 561.3487         | 1123.6620 | 562.3447          | 1124.6899 | 562.8486          | 10 |    |
| 9  | 1066.6368 | 533.8220        | 1049.6102      | 525.3087         | 1048.6262      | 524.8167         | 1083.6633 | 542.3353        | G    |           |           | 1011.6422 | 506.3247        | 994.6156       | 497.8115         | 993.6316       | 497.3194         | 995.6235  | 498.3154          | 996.6313  | 498.8193          | 9  |    |
| 10 | 1179.7208 | 590.3640        | 1162.6943      | 581.8508         | 1161.7103      | 581.3588         | 1196.7474 | 598.8773        | I    | 909.5629  | 923.5785  | 954.6207  | 477.8140        | 937.5942       | 469.3007         | 936.6101       | 468.8087         | 938.6020  | 469.8046          | 939.6098  | 470.3085          | 8  |    |
| 11 | 1280.7685 | 640.8879        | 1263.7419      | 632.3746         | 1262.7579      | 631.8826         | 1297.7950 | 649.4012        | T    | 808.5152  | 810.4944  | 841.5366  | 421.2720        | 824.5101       | 412.7587         | 823.5261       | 412.2667         | 825.5179  | 413.2626          | 826.5257  | 413.7665          | 7  |    |
| 12 | 1408.8635 | 704.9354        | 1391.8369      | 696.4221         | 1390.8529      | 695.9301         | 1425.8900 | 713.4486        | K    | 666.4046  |           | 740.4890  | 370.7481        | 723.4624       | 362.2348         |                |                  | 724.4702  | 362.7388          | 725.4781  | 363.2427          | 6  |    |
| 13 | 1505.9162 | 753.4618        | 1488.8897      | 744.9485         | 1487.9057      | 744.4565         | 1522.9428 | 761.9750        | P    | 569.3518  |           | 612.3940  | 306.7006        | 595.3675       | 298.1874         |                |                  | 596.3753  | 298.6913          | 597.3831  | 299.1952          | 5  |    |
| 14 | 1576.9533 | 788.9803        | 1559.9268      | 780.4670         | 1558.9428      | 779.9750         | 1593.9799 | 797.4936        | A    |           |           | 515.3412  | 258.1743        | 498.3147       | 249.6610         |                |                  | 499.3225  | 250.1649          | 500.3303  | 250.6688          | 4  |    |
| 15 | 1690.0374 | 845.5223        | 1673.0109      | 837.0091         | 1672.0268      | 836.5171         | 1707.0640 | 854.0356        | I    | 399.2463  | 413.2619  | 444.3041  | 222.6557        | 427.2776       | 214.1424         |                |                  | 428.2854  | 214.6463          | 429.2932  | 215.1503          | 3  |    |
| 16 | 1846.1385 | 923.5729        | 1829.1120      | 915.0596         | 1828.1279      | 914.5676         | 1863.1651 | 932.0862        | R    | 229.1295  |           | 331.2201  | 166.1137        | 314.1935       | 157.6004         |                |                  | 315.2013  | 158.1043          | 316.2092  | 158.6082          | 2  |    |
| 17 |           |                 |                |                  |                |                  |           |                 | R    | 73.0284   |           | 175.1190  | 88.0631         | 158.0924       | 79.5498          |                |                  | 159.1002  | 80.0538           | 160.1081  | 80.5577           | 1  |    |

Monoisotopic mass of neutral peptide Mr(calc): 2019.2429

Fixed modifications: Carbamidomethyl (C) (apply to specified residues or termini only)

Variable modifications:

R4 : Trimethyl (R)

Ions Score: 41 Expect: 0.013

Matches : 18/286 fragment ions using 23 most intense peaks ([help](#))

# Mascot Search Results: Peptide View

(K)VL(Rme3)DNIQGITKPAIRR

MS/MS Fragmentation of **KVLRDNIQGITKPAIRRLAR**

Found in **sp|P62806|H4\_MOUSE** in **fgcz\_10090**, Histone H4 OS=Mus musculus GN=Hist1h4a

Match to Query 5013: 2345.444484 from(391.914690,6+) intensity(16222.5950) scans(3598) rtinseconds(2484.1767) index(1674)

Title: 1530: Scan 3598 (rt=41.4029) [s:\p749\Proteomics\ORBI\_2\andreamizzi\_20110310\_sperm\_trypsin\_chymo\_AspN\_ETD\_CID\20110311\_37\_NaCl\_trypsin\_SCX\_3.RAW]

Data file Y:\p749\Proteomics\Mascot\mgr50\_20110426\_sperm\_rerun\_trypsin\_2nd\_ETD\_run\_NaCl\_SCX\mascot\_daemon\_merge.mgf

Click mouse within plot area to zoom in by factor of two about that point

Or,  to  Da

Label all possible matches  Label matches used for scoring

Show Y-axis

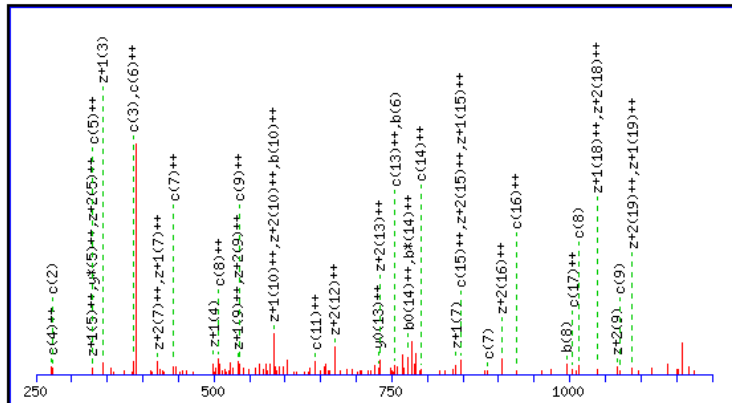

| #  | b               | b <sup>++</sup> | b <sup>+</sup> | b <sup>+++</sup> | b <sup>0</sup> | b <sup>0++</sup> | c                | c <sup>++</sup>  | Seq. | w         | w <sup>+</sup> | y         | y <sup>++</sup> | y <sup>+</sup> | y <sup>+++</sup> | y <sup>0</sup> | y <sup>0++</sup> | z+1             | z+1 <sup>++</sup> | z+2              | z+2 <sup>++</sup> | #  |
|----|-----------------|-----------------|----------------|------------------|----------------|------------------|------------------|------------------|------|-----------|----------------|-----------|-----------------|----------------|------------------|----------------|------------------|-----------------|-------------------|------------------|-------------------|----|
| 1  | 157.1335        | 79.0704         | 140.1070       | 70.5571          |                |                  | 174.1601         | 87.5837          | K    |           |                |           |                 |                |                  |                |                  |                 |                   |                  |                   | 20 |
| 2  | 256.2020        | 128.6046        | 239.1754       | 120.0913         |                |                  | <b>275.2285</b>  | 137.1179         | V    | 2159.2884 |                | 2190.3306 | 1095.6689       | 2173.3040      | 1087.1556        | 2172.3200      | 1086.6636        | 2174.3118       | <b>1087.6594</b>  | 2175.3197        | <b>1088.1635</b>  | 19 |
| 3  | 369.2860        | 185.1466        | 352.2595       | 176.6334         |                |                  | <b>386.3126</b>  | 193.6599         | L    | 2032.1887 |                | 2091.2622 | 1046.1347       | 2074.2356      | 1037.6214        | 2073.2516      | 1037.1294        | 2075.2434       | <b>1038.1254</b>  | 2076.2513        | <b>1038.6293</b>  | 18 |
| 4  | 523.3871        | 263.1972        | 508.3606       | 254.6839         |                |                  | 542.4137         | <b>271.7105</b>  | R    | 1876.0875 |                | 1978.1781 | 989.5927        | 1961.1515      | 981.0794         | 1960.1675      | 980.5874         | 1962.1594       | 981.5833          | 1963.1672        | 982.0872          | 17 |
| 5  | 640.4141        | 320.7107        | 623.3875       | 312.1974         | 622.4035       | 311.7054         | 657.4406         | <b>329.2339</b>  | D    | 1761.0606 |                | 1822.0770 | 911.5421        | 1805.0504      | 903.0289         | 1804.0664      | 902.5368         | 1806.0583       | 903.5328          | 1807.0661        | <b>904.0367</b>   | 16 |
| 6  | <b>754.4570</b> | 377.7321        | 737.4304       | 369.2189         | 736.4464       | 368.7269         | 771.4835         | <b>386.2454</b>  | N    | 1647.0177 |                | 1707.0500 | 854.0287        | 1690.0235      | 845.5154         | 1689.0395      | 845.0234         | 1691.0313       | <b>846.0193</b>   | 1692.0391        | <b>846.5232</b>   | 15 |
| 7  | 867.5411        | 434.2742        | 850.5145       | 425.7609         | 849.5305       | 423.2689         | <b>884.5676</b>  | <b>442.7874</b>  | I    | 1547.9493 | 1561.9649      | 1593.0071 | 797.0072        | 1575.9806      | 788.4939         | 1574.9965      | 788.0019         | 1576.9884       | 788.9978          | 1577.9962        | 789.5017          | 14 |
| 8  | <b>995.5996</b> | 498.3035        | 978.5731       | 489.7902         | 977.5891       | 489.2982         | <b>1012.6262</b> | <b>506.8167</b>  | Q    | 1405.8750 |                | 1479.9230 | 740.4652        | 1462.8965      | 731.9519         | 1461.9125      | <b>731.4599</b>  | 1463.9043       | 732.4558          | 1464.9121        | <b>732.9597</b>   | 13 |
| 9  | 1052.6211       | 526.8142        | 1035.5946      | 518.3009         | 1034.6105      | 517.8089         | <b>1069.6477</b> | <b>535.3275</b>  | G    |           |                | 1351.8645 | 676.4359        | 1334.8379      | 667.9226         | 1333.8539      | 667.4306         | 1335.8457       | 668.4265          | 1336.8536        | <b>668.9304</b>   | 12 |
| 10 | 1165.7052       | <b>583.3562</b> | 1148.6786      | 574.8429         | 1147.6946      | 574.3509         | 1182.7317        | 591.8695         | I    | 1249.7852 | 1263.8008      | 1294.8430 | 647.9251        | 1277.8165      | 639.4119         | 1276.8324      | 638.9199         | 1278.8243       | 639.9158          | 1279.8321        | 640.4197          | 11 |
| 11 | 1266.7528       | 633.8801        | 1249.7263      | 625.3668         | 1248.7423      | 624.8748         | 1283.7794        | <b>642.3933</b>  | T    | 1148.7375 | 1150.7167      | 1181.7589 | 591.3831        | 1164.7324      | 582.8698         | 1163.7484      | 582.3778         | 1165.7402       | <b>583.3737</b>   | 1166.7480        | <b>583.8777</b>   | 10 |
| 12 | 1394.8478       | 697.9275        | 1377.8213      | 689.4143         | 1376.8372      | 688.9223         | 1411.8744        | 706.4408         | K    | 1006.6269 |                | 1080.7113 | 540.8593        | 1063.6847      | 532.3460         |                |                  | 1064.6925       | <b>532.8499</b>   | <b>1065.7004</b> | <b>533.3538</b>   | 9  |
| 13 | 1491.9006       | 746.4539        | 1474.8740      | 737.9407         | 1473.8900      | 737.4486         | 1508.9271        | <b>754.9672</b>  | P    | 909.5741  |                | 952.6163  | 476.8118        | 935.5897       | 468.2985         |                |                  | 936.5976        | 468.8024          | 937.6054         | 469.3063          | 8  |
| 14 | 1562.9377       | 781.9725        | 1545.9111      | <b>773.4592</b>  | 1544.9271      | <b>772.9672</b>  | 1579.9642        | <b>790.4858</b>  | A    |           |                | 855.5635  | 428.2854        | 838.5370       | 419.7721         |                |                  | <b>839.5448</b> | <b>420.2760</b>   | 840.5526         | <b>420.7800</b>   | 7  |
| 15 | 1676.0218       | 838.5145        | 1658.9952      | 830.0012         | 1658.0112      | 829.5092         | 1693.0483        | <b>847.0278</b>  | I    | 739.4686  | 753.4842       | 784.5264  | 392.7668        | 767.4999       | 384.2536         |                |                  | 768.5077        | 384.7575          | 769.5155         | 385.2614          | 6  |
| 16 | 1832.1229       | 916.5651        | 1815.0963      | 908.0518         | 1814.1123      | 907.5598         | 1849.1494        | <b>925.0783</b>  | R    | 569.3518  |                | 671.4424  | 336.2248        | 654.5148       | <b>327.7115</b>  |                |                  | 655.4236        | <b>328.2155</b>   | 656.4315         | <b>328.7194</b>   | 5  |
| 17 | 1988.2240       | 994.6156        | 1971.1974      | 986.1024         | 1970.2134      | 985.6103         | 2005.2505        | <b>1003.1289</b> | R    | 413.2507  |                | 515.3412  | 258.1743        | 498.3147       | 249.6610         |                |                  | <b>499.3225</b> | 250.1649          | 500.3303         | 250.6688          | 4  |
| 18 | 2101.3080       | 1051.1577       | 2084.2815      | 1042.6444        | 2083.2975      | 1042.1524        | 2118.3346        | 1059.6709        | L    | 300.1666  |                | 359.2401  | 180.1237        | 342.2136       | 171.6104         |                |                  | <b>343.2214</b> | 172.1143          | 344.2292         | 172.6183          | 3  |
| 19 | 2172.3452       | 1086.6762       | 2155.3186      | 1078.1629        | 2154.3346      | 1077.6709        | 2189.3717        | 1095.1895        | A    |           |                | 246.1561  | 123.5817        | 229.1295       | 115.0684         |                |                  | 230.1373        | 115.5723          | 231.1452         | 116.0762          | 2  |
| 20 |                 |                 |                |                  |                |                  |                  |                  | R    | 73.0284   |                | 175.1190  | 88.0631         | 158.0924       | 79.5498          |                |                  | 159.1002        | 80.0538           | 160.1081         | 80.5577           | 1  |

Monoisotopic mass of neutral peptide Mr(calc): 2345.4495

Fixed modifications: Carbamidomethyl (C) (apply to specified residues or termini only)

Variable modifications:

K1 : Dimethyl\_KR (KR)

Ions Score: 54 Expect: 0.00064

Matches : 45/336 fragment ions using 62 most intense peaks ([help](#))

# Mascot Search Results: Peptide View

Kme2VLRDNIQGITKPAIRRLAR

MS/MS Fragmentation of **KVLRDNIQGITKPAIRRLAR**

Found in **sp|P62806|H4\_MOUSE** in **fgcz\_10090**, Histone H4 OS=Mus musculus GN=Hist1h4a

Match to Query 5065: 2359.465370 from(472.900350,5+) intensity(49007.9100) scans(3580) rtinseconds(2472.0198) index(1665)

Title: 1521: Scan 3580 (rt=41.2003) [s:\p749\Proteomics\ORBI\_2\andreamizzi\_20110310\_sperm\_trypsin\_chymo\_AspN\_ETD\_CID\20110311\_37\_NaCl\_trypsin\_SCX\_3.RAW]

Data file Y:\p749\Proteomics\Mascot\mgf50\_20110426\_sperm\_rerun\_trypsin\_2nd\_ETD\_run\_NaCl\_SCX\mascot\_daemon\_merge.mgf

Click mouse within plot area to zoom in by factor of two about that point

Or, Plot from  to  Da

Label all possible matches  Label matches used for scoring

Show Y-axis

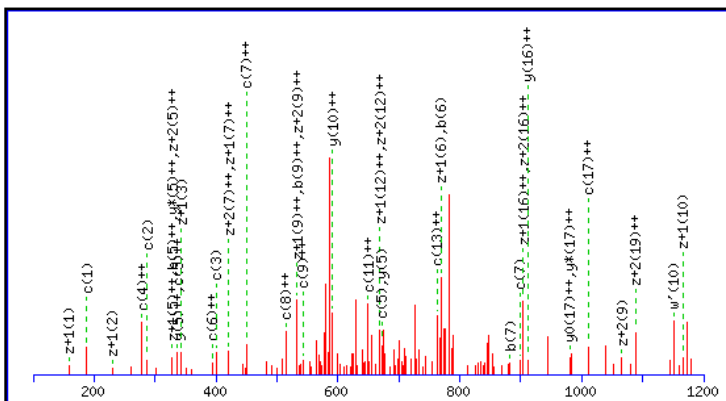

| #  | b         | b <sup>++</sup> | b <sup>+</sup> | b <sup>+++</sup> | b <sup>0</sup> | b <sup>++</sup> | c         | c <sup>++</sup> | Seq | w | w' | y         | y <sup>++</sup> | y <sup>+</sup> | y <sup>+++</sup> | y <sup>0</sup> | y <sup>++</sup> | z+1       | z+1 <sup>++</sup> | z+2       | z+2 <sup>++</sup> | #         |         |   |
|----|-----------|-----------------|----------------|------------------|----------------|-----------------|-----------|-----------------|-----|---|----|-----------|-----------------|----------------|------------------|----------------|-----------------|-----------|-------------------|-----------|-------------------|-----------|---------|---|
| 1  | 171.1492  | 86.0782         | 154.1226       | 77.5650          |                |                 | 188.1757  | 94.5915         | K   |   |    |           |                 |                |                  |                |                 |           |                   |           |                   |           | 20      |   |
| 2  | 270.2176  | 135.6124        | 253.1911       | 127.0992         |                |                 | 287.2442  | 144.1257        | V   |   |    | 2190.3306 | 1095.6689       | 2173.3040      | 1087.1536        | 2172.3200      | 1086.6636       | 2174.3118 | 1087.6596         | 2175.3197 | 1088.1635         | 19        |         |   |
| 3  | 383.3017  | 192.1545        | 366.2751       | 183.6412         |                |                 | 400.3282  | 200.6677        | L   |   |    | 2091.2622 | 1046.1347       | 2074.2356      | 1037.6214        | 2073.2516      | 1037.1294       | 2075.2434 | 1038.1254         | 2076.2513 | 1038.6293         | 18        |         |   |
| 4  | 539.4028  | 270.2050        | 522.3762       | 261.6918         |                |                 | 556.4293  | 278.7183        | R   |   |    | 1978.1781 | 989.5927        | 1961.1515      | 981.0794         | 1960.1675      | 980.5874        | 1962.1594 | 981.5833          | 1963.1672 | 982.0872          | 17        |         |   |
| 5  | 654.4297  | 327.7185        | 637.4032       | 319.2052         | 636.4192       | 318.7132        | 671.4563  | 336.2318        | D   |   |    | 1822.0770 | 911.5421        | 1805.0504      | 903.0289         | 1804.0664      | 902.5368        | 1806.0583 | 903.5328          | 1807.0661 | 904.0367          | 16        |         |   |
| 6  | 768.4726  | 384.7400        | 751.4461       | 376.2267         | 750.4621       | 375.7347        | 785.4992  | 393.2532        | N   |   |    | 1707.0500 | 854.0287        | 1690.0235      | 845.5154         | 1689.0395      | 845.0234        | 1691.0313 | 846.0193          | 1692.0391 | 846.5232          | 15        |         |   |
| 7  | 881.5567  | 441.2820        | 864.5302       | 432.7687         | 863.5461       | 432.2767        | 898.5833  | 449.7933        | I   |   |    | 1547.9493 | 1561.9649       | 1593.0071      | 797.0072         | 1575.9806      | 788.4939        | 1574.9965 | 788.0019          | 1576.9884 | 789.5017          | 14        |         |   |
| 8  | 1009.6153 | 505.3113        | 992.5887       | 496.7980         | 991.6047       | 496.3060        | 1026.6418 | 513.8246        | Q   |   |    | 1479.9230 | 740.4652        | 1462.8965      | 731.9519         | 1461.9125      | 731.4599        | 1463.9043 | 732.4558          | 1464.9121 | 732.9597          | 13        |         |   |
| 9  | 1066.6368 | 533.8220        | 1049.6102      | 525.3087         | 1048.6262      | 524.8167        | 1083.6633 | 542.3353        | G   |   |    | 1351.8645 | 676.4359        | 1334.8379      | 667.9226         | 1333.8539      | 667.4306        | 1335.8457 | 668.4265          | 1336.8536 | 669.9304          | 12        |         |   |
| 10 | 1179.7208 | 590.3640        | 1162.6943      | 581.8508         | 1161.7103      | 581.3588        | 1196.7474 | 598.8773        | J   |   |    | 1249.7852 | 1263.8008       | 1294.8430      | 647.9251         | 1277.8165      | 639.4119        | 1276.8324 | 638.9199          | 1278.8243 | 639.9158          | 1279.8321 | 11      |   |
| 11 | 1280.7685 | 640.8879        | 1263.7149      | 632.3746         | 1262.7579      | 631.8826        | 1297.7950 | 649.4072        | T   |   |    | 1148.7375 | 1150.7167       | 1181.7589      | 591.3831         | 1164.7324      | 582.8698        | 1163.7484 | 582.3778          | 1165.7402 | 583.3737          | 1166.7480 | 10      |   |
| 12 | 1408.8635 | 704.9354        | 1391.8369      | 696.4221         | 1390.8529      | 695.9301        | 1425.8900 | 713.4486        | K   |   |    | 1080.7113 | 540.8593        | 1063.6847      | 532.3460         |                |                 | 1064.6925 | 532.8499          | 1065.7004 | 533.3538          | 9         |         |   |
| 13 | 1505.9162 | 753.4618        | 1488.8897      | 744.9485         | 1487.9057      | 744.4565        | 1522.9428 | 761.9750        | P   |   |    | 952.6163  | 476.8118        | 935.5897       | 468.2985         |                |                 | 936.5976  | 468.8024          | 937.6054  | 469.3063          | 8         |         |   |
| 14 | 1576.9533 | 788.9603        | 1559.9268      | 780.4670         | 1558.9428      | 779.9750        | 1593.9799 | 797.4936        | A   |   |    | 855.5635  | 428.2854        | 838.5370       | 419.7721         |                |                 | 839.5448  | 420.2760          | 840.5526  | 420.7800          | 7         |         |   |
| 15 | 1690.0374 | 845.5223        | 1673.0109      | 837.0091         | 1672.0268      | 836.5171        | 1707.0640 | 854.0356        | I   |   |    | 739.4686  | 753.4842        | 784.5264       | 392.7668         | 767.4999       | 384.2536        |           |                   | 768.5077  | 384.7575          | 769.5155  | 6       |   |
| 16 | 1846.1385 | 923.5729        | 1829.1120      | 915.0596         | 1828.1279      | 914.5676        | 1863.1651 | 932.0862        | R   |   |    | 671.4424  | 336.2248        | 654.4158       | 327.7115         |                |                 | 655.4236  | 328.2155          | 656.4315  | 328.7194          | 5         |         |   |
| 17 | 2002.2396 | 1001.6234       | 1985.2131      | 993.1102         | 1984.2291      | 992.6182        | 2019.2662 | 1010.1367       | R   |   |    | 515.3412  | 258.1743        | 498.3147       | 249.6610         |                |                 | 499.3225  | 250.1649          | 500.3303  | 250.6688          | 4         |         |   |
| 18 | 2115.3237 | 1058.1655       | 2098.2971      | 1049.6522        | 2097.3131      | 1049.1602       | 2132.3502 | 1066.6788       | L   |   |    | 359.2401  | 180.1237        | 342.2136       | 171.6104         |                |                 | 343.2214  | 172.1143          | 344.2292  | 172.6183          | 3         |         |   |
| 19 | 2186.3608 | 1093.6840       | 2169.3343      | 1085.1708        | 2168.3502      | 1084.6788       | 2203.3874 | 1102.1973       | A   |   |    | 246.1561  | 123.5817        | 229.1295       | 115.0684         |                |                 | 230.1373  | 115.5723          | 231.1452  | 116.0762          | 2         |         |   |
| 20 |           |                 |                |                  |                |                 |           |                 | R   |   |    | 73.0284   |                 | 175.1190       | 88.0631          | 158.0924       | 79.5498         |           |                   | 159.1002  | 80.0538           | 160.1081  | 80.5577 | 1 |

Monoisotopic mass of neutral peptide Mr(calc): 2359.4651

Fixed modifications: Carbamidomethyl (C) (apply to specified residues or termini only)

Variable modifications:

K1 : Trimethyl (K)

Ions Score: 44 Expect: 0.024

Matches : 43/336 fragment ions using 52 most intense peaks ([help](#))

# Mascot Search Results: Peptide View

Kme3VLRDNIQGITKPAIRRLAR



MS/MS Fragmentation of **SGRGKGGKGLGK**

Found in **sp|P62806|H4\_MOUSE** in **fgcz\_10090**, Histone H4 OS=Mus musculus GN=Hist1h4a

Match to Query 618: 1142.654682 from(381.892170,3+) intensity(29678.1660) scans(1977) rtinseconds(1354.6946) index(1041)

Title: 1042: Scan 1977 (rt=22.5782) [s:\p749\Proteomics\ORBI\_2\andreamizzi\_20110517\_sperm\_trypsin\_GluC\_ETD\_CID\20110517\_06\_swimup\_NaCl\_1.RAW]

Data file 20110517\_06\_swimup\_NaCl\_1.mgf

Click mouse within plot area to zoom in by factor of two about that point

Or, Plot from  to  Da

Label all possible matches  Label matches used for scoring

Show Y-axis

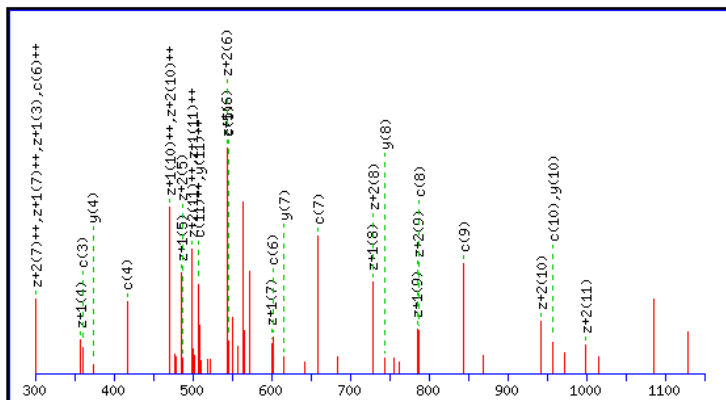

| #  | b        | b <sup>++</sup> | b <sup>*</sup> | b <sup>+++</sup> | b <sup>0</sup> | b <sup>0++</sup> | c         | c <sup>++</sup> | Seq. | w        | y         | y <sup>++</sup> | y <sup>*</sup> | y <sup>+++</sup> | z+1      | z+1 <sup>++</sup> | z+2      | z+2 <sup>++</sup> | # |    |
|----|----------|-----------------|----------------|------------------|----------------|------------------|-----------|-----------------|------|----------|-----------|-----------------|----------------|------------------|----------|-------------------|----------|-------------------|---|----|
| 1  | 130.0499 | 65.5286         |                |                  | 112.0393       | 56.5233          | 147.0764  | 74.0418         | S    |          |           |                 |                |                  |          |                   |          |                   |   | 12 |
| 2  | 187.0713 | 94.0393         |                |                  | 169.0608       | 85.0340          | 204.0979  | 102.5526        | G    |          | 1014.6167 | 507.8120        | 997.5901       | 499.2987         | 998.5980 | 499.8026          | 999.6058 | 500.3065          |   | 11 |
| 3  | 343.1724 | 172.0899        | 326.1459       | 163.5766         | 325.1619       | 163.0846         | 360.1990  | 180.6031        | R    | 855.5047 | 957.5952  | 479.3013        | 940.5687       | 470.7880         | 941.5765 | 471.2919          | 942.5843 | 471.7958          |   | 10 |
| 4  | 400.1939 | 200.6006        | 383.1674       | 192.0873         | 382.1833       | 191.5953         | 417.2205  | 209.1139        | G    |          | 801.4941  | 401.2507        | 784.4676       | 392.7374         | 785.4754 | 393.2413          | 786.4832 | 393.7452          |   | 9  |
| 5  | 528.2889 | 264.6481        | 511.2623       | 256.1348         | 510.2783       | 255.6428         | 545.3154  | 273.1613        | K    | 670.3883 | 744.4727  | 372.7400        | 727.4461       | 364.2267         | 728.4539 | 364.7306          | 729.4618 | 365.2345          |   | 8  |
| 6  | 585.3103 | 293.1588        | 568.2838       | 284.6455         | 567.2998       | 284.1535         | 602.3369  | 301.6721        | G    |          | 616.3777  | 308.6925        | 599.3511       | 300.1792         | 600.3590 | 300.6831          | 601.3668 | 301.1870          |   | 7  |
| 7  | 642.3318 | 321.6695        | 625.3053       | 313.1563         | 624.3212       | 312.6643         | 659.3583  | 330.1828        | G    |          | 559.3562  | 280.1817        | 542.3297       | 271.6685         | 543.3375 | 272.1724          | 544.3453 | 272.6763          |   | 6  |
| 8  | 770.4268 | 385.7170        | 753.4002       | 377.2037         | 752.4162       | 376.7117         | 787.4533  | 394.2303        | K    | 428.2504 | 502.3348  | 251.6710        | 485.3082       | 243.1577         | 486.3160 | 243.6617          | 487.3239 | 244.1656          |   | 5  |
| 9  | 827.4482 | 414.2278        | 810.4217       | 405.7145         | 809.4377       | 405.2225         | 844.4748  | 422.7410        | G    |          | 374.2398  | 187.6235        | 357.2132       | 179.1103         | 358.2211 | 179.6142          | 359.2289 | 180.1181          |   | 4  |
| 10 | 940.5323 | 470.7698        | 923.5057       | 462.2565         | 922.5217       | 461.7645         | 957.5588  | 479.2831        | L    | 258.1448 | 317.2183  | 159.1128        | 300.1918       | 150.5995         | 301.1996 | 151.1034          | 302.2074 | 151.6074          |   | 3  |
| 11 | 997.5538 | 499.2805        | 980.5272       | 490.7672         | 979.5432       | 490.2752         | 1014.5803 | 507.7938        | G    |          | 204.1343  | 102.5708        | 187.1077       | 94.0575          | 188.1155 | 94.5614           | 189.1234 | 95.0653           |   | 2  |
| 12 |          |                 |                |                  |                |                  |           |                 | K    | 73.0284  | 147.1128  | 74.0600         | 130.0863       | 65.5468          | 131.0941 | 66.0507           | 132.1019 | 66.5546           |   | 1  |

**Monoisotopic mass of neutral peptide Mr(calc): 1142.6520**

**Fixed modifications:** Carbamidomethyl (C) (apply to specified residues or termini only)

**Variable modifications:**

S1 : Acetyl\_STY (STY)

Ions Score: 58 Expect: 0.00093

Matches : 34/177 fragment ions using 45 most intense peaks ([help](#))

# Mascot Search Results: Peptide View

SacGRGKGGKGLGK
