# Supplementary material for: Epigenetic marking of sperm by post-translational modification of histones and protamines
Source: PubMed Central journal article supplement (PMC3904194; doi:10.1186/1756-8935-7-2), 2014-01-20

### PRM2 (2 – 106)

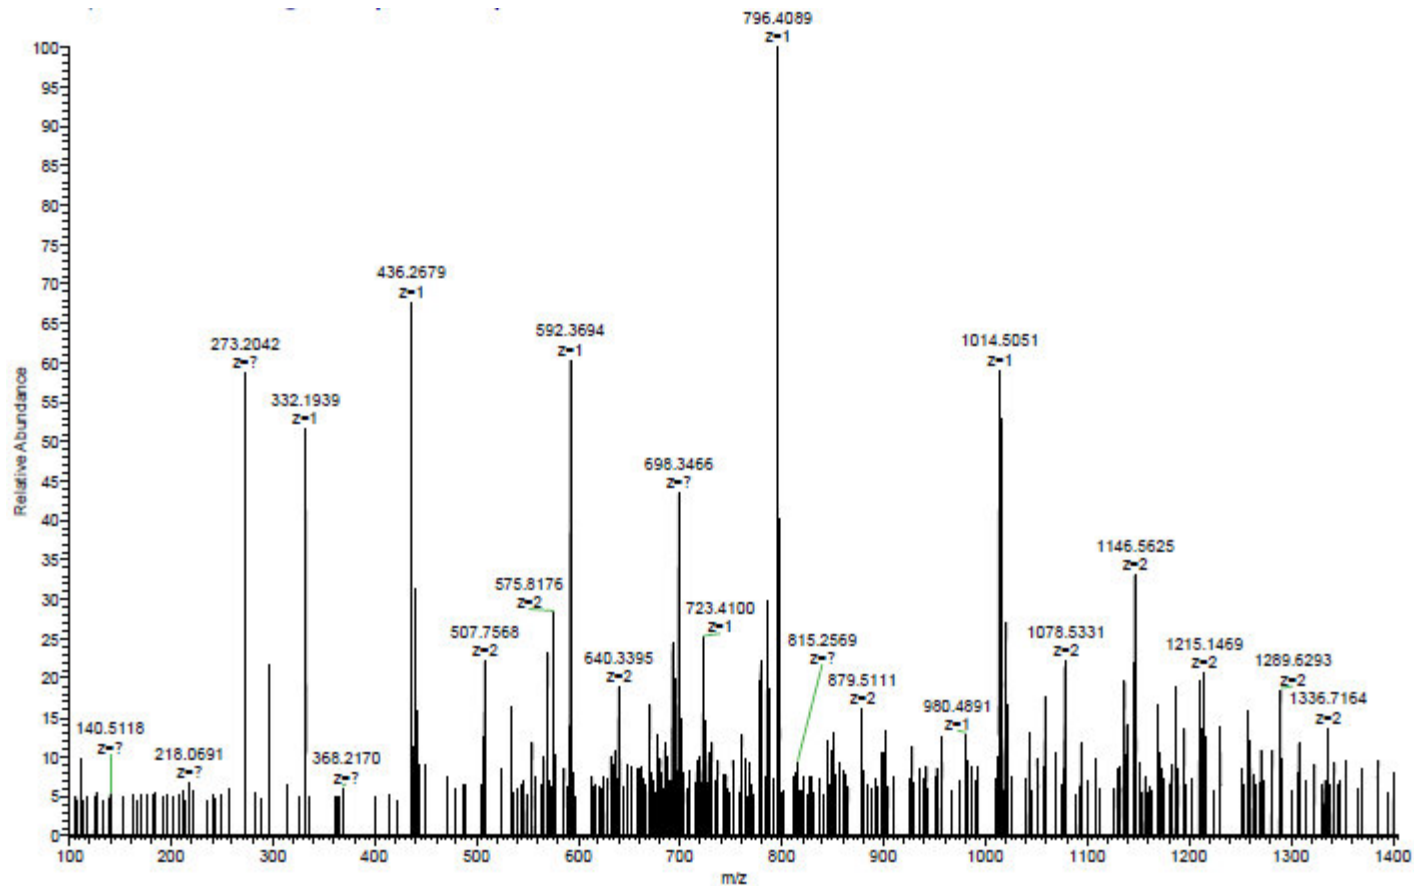

# PRM2 (44 – 106)

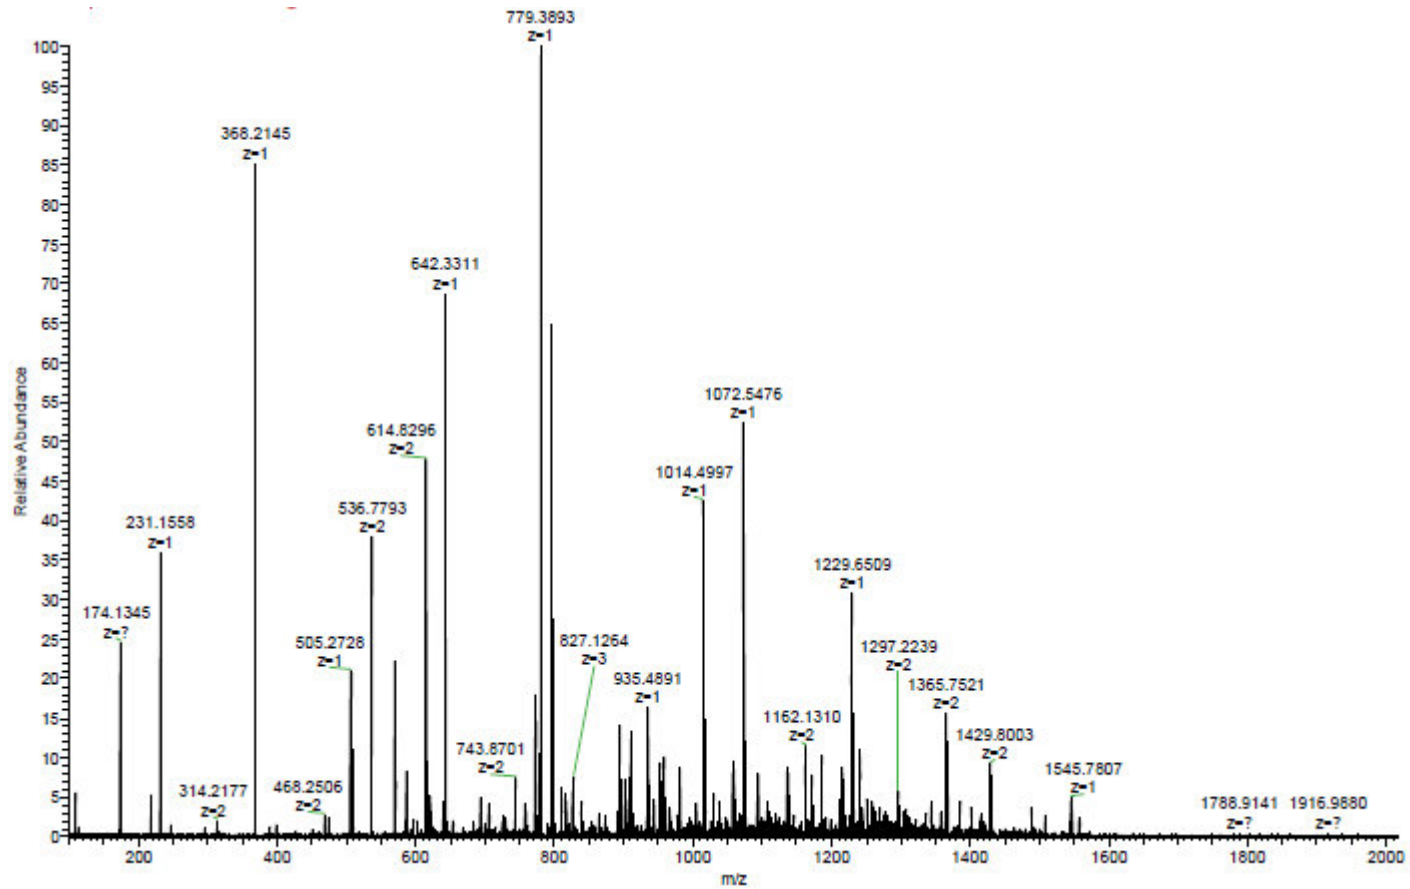

# PRM2 (44 – 106)

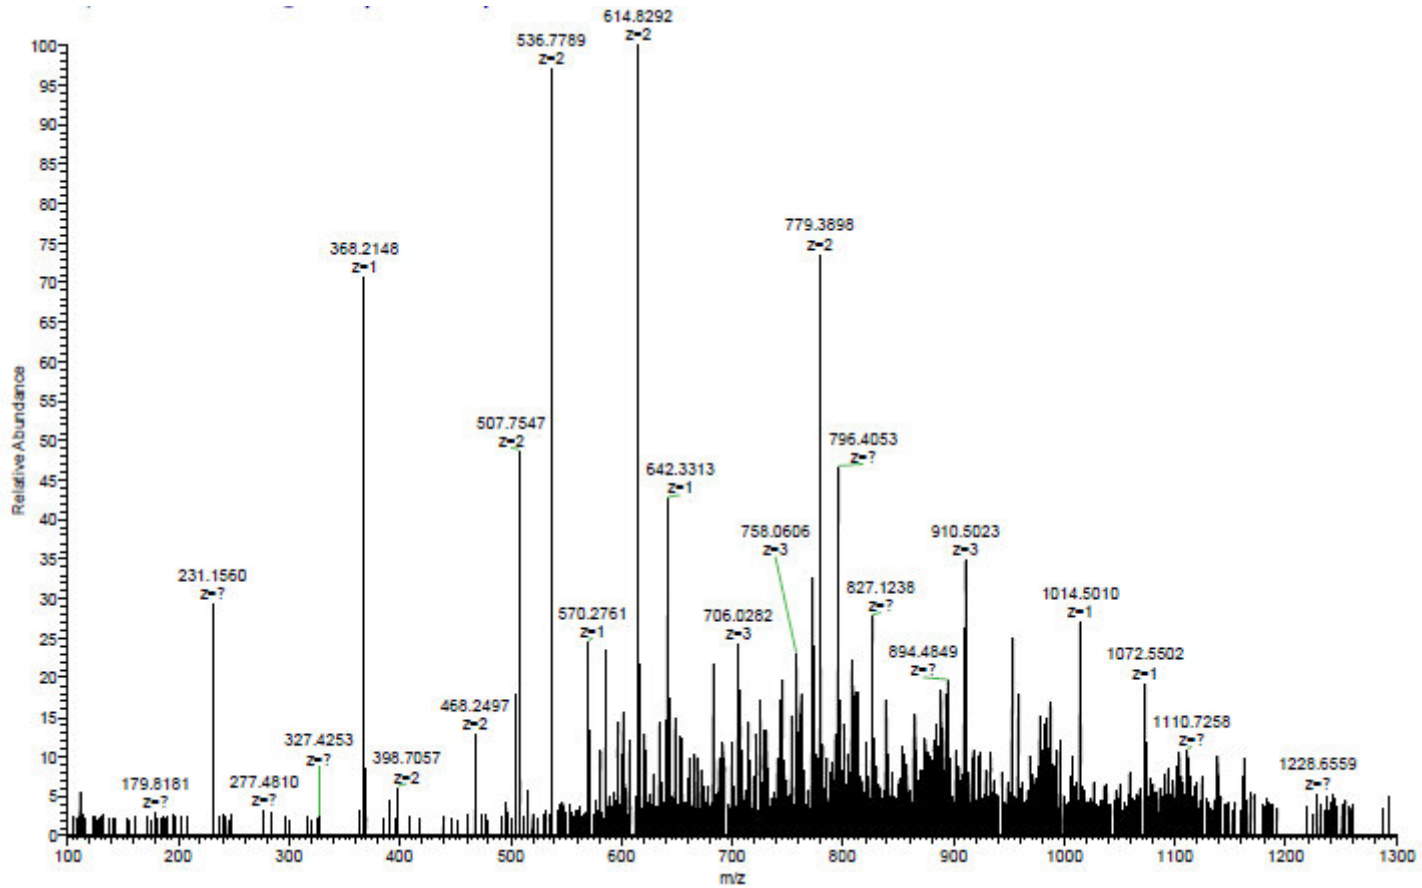

# PRM2 (44 – 106) S55p

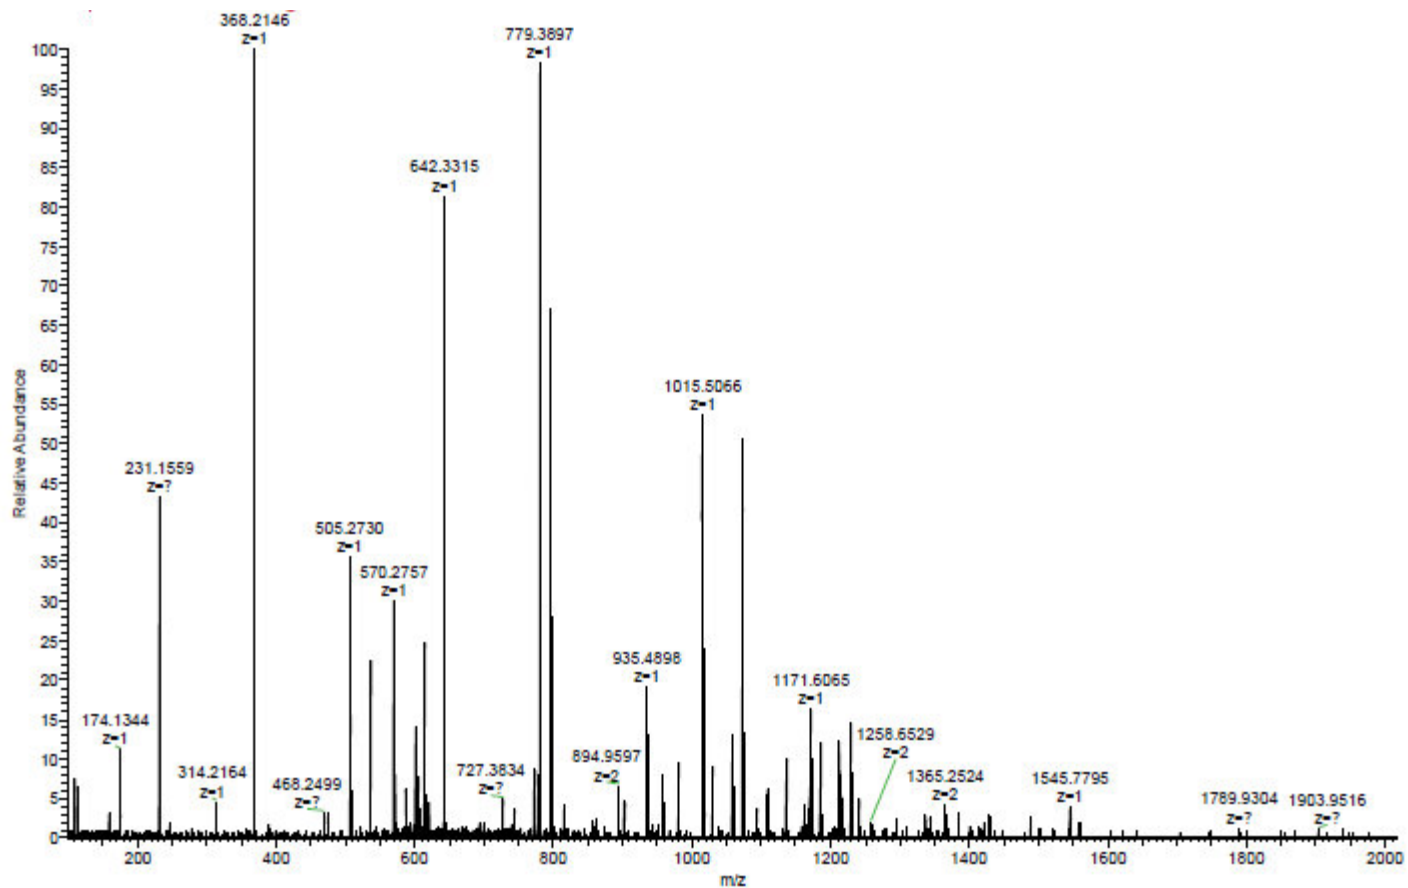

# PRM2 (44 – 106) S55p

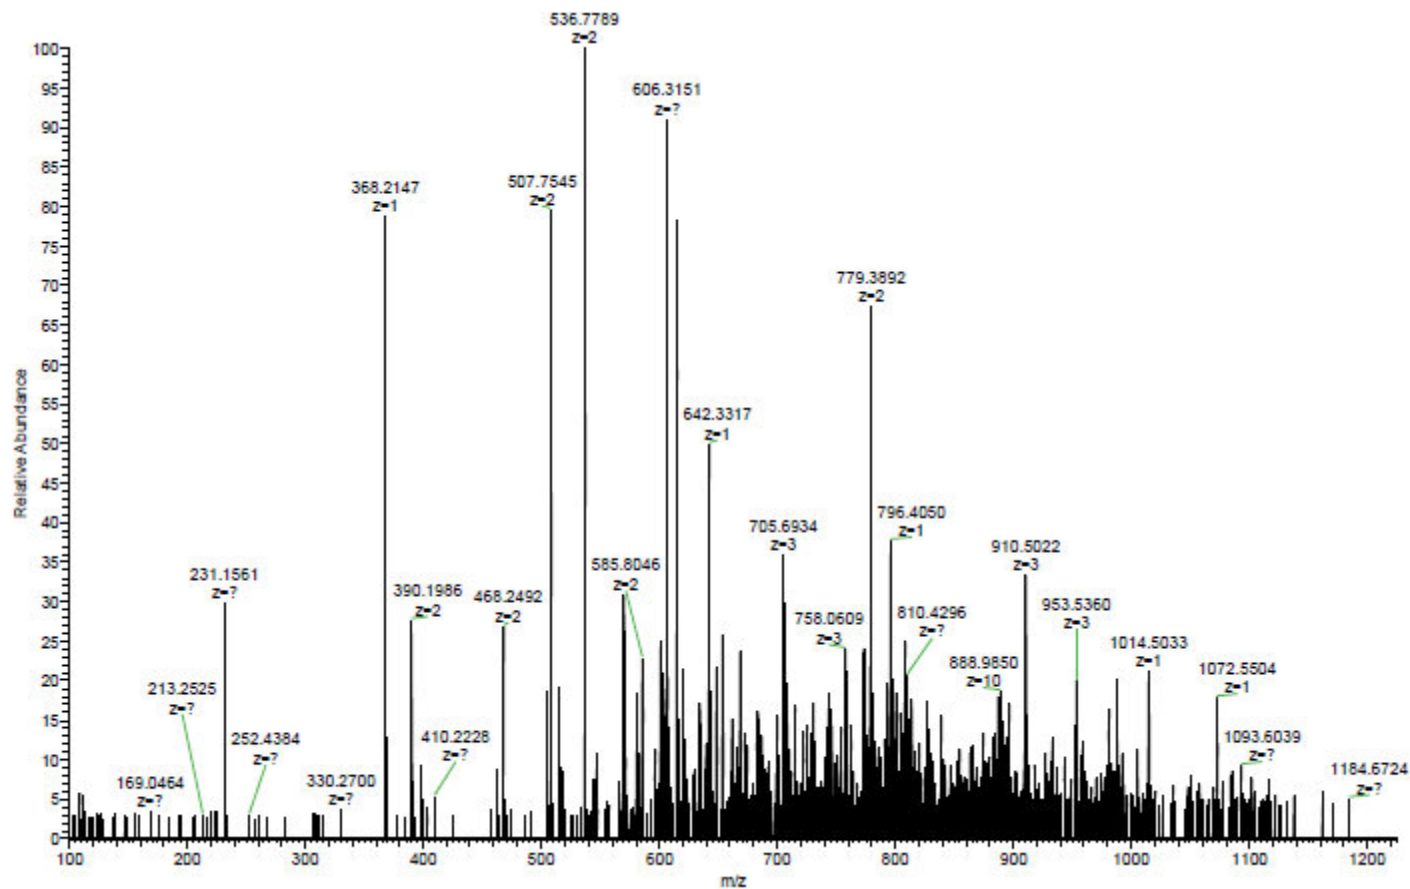

PRM2 (44 – 106) S55ac;  
K57ac;

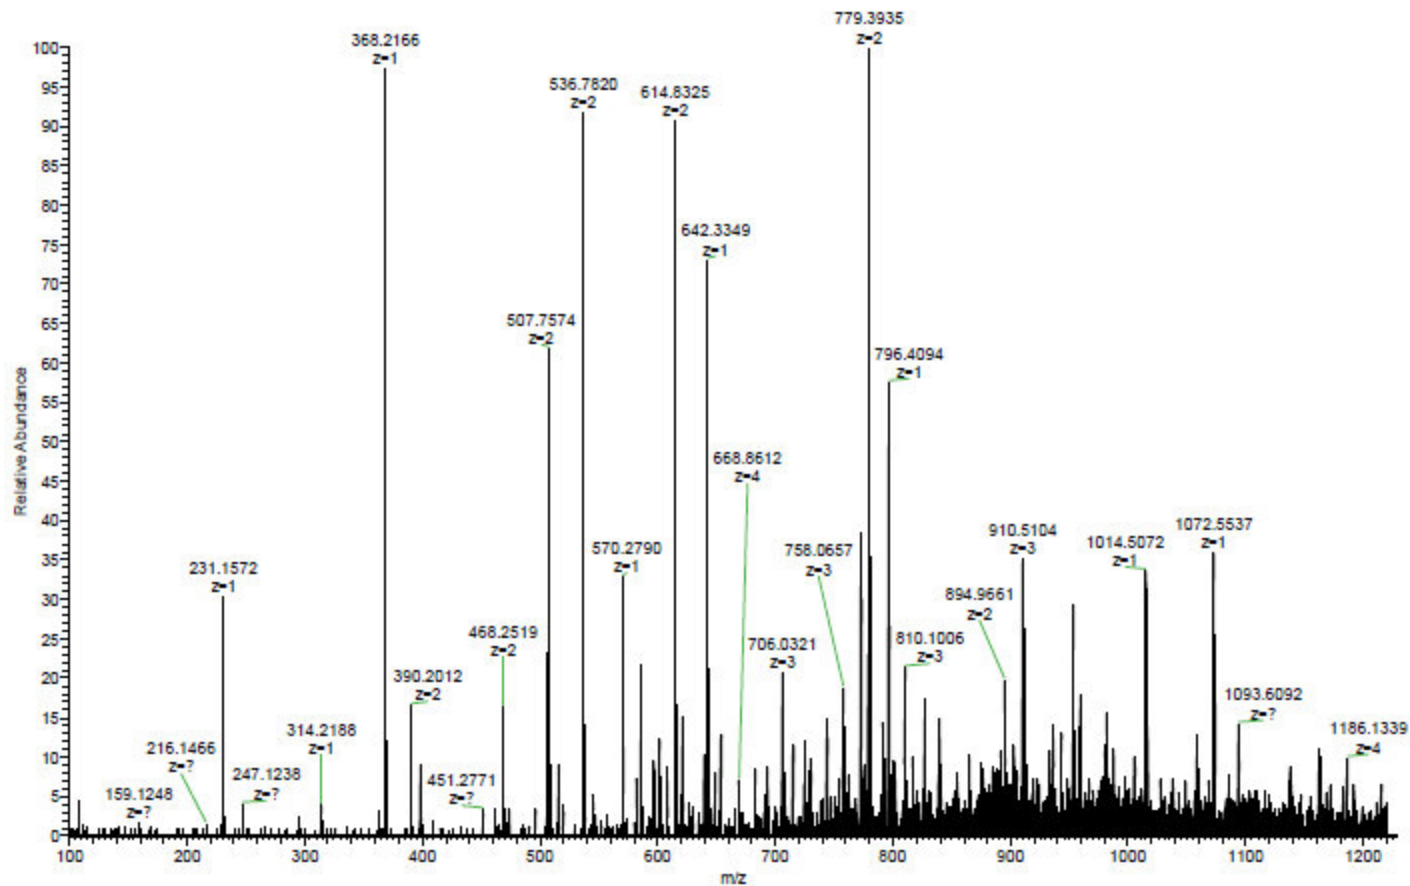

PRM2 (44 – 106) S55ac and K57ac;  
S55/K57ac and K64ac;  
S55/K57ac and K90ac

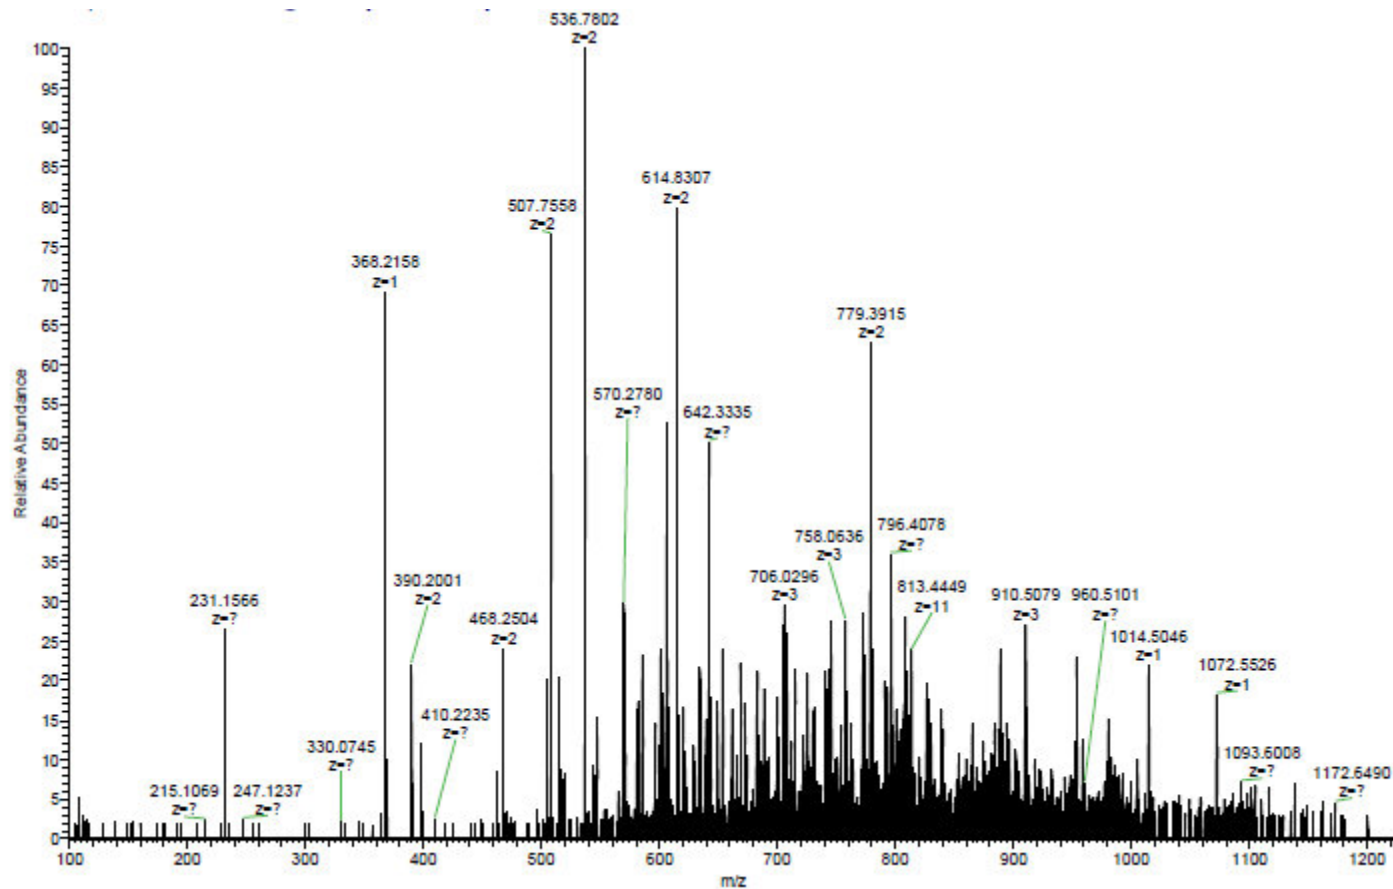

PRM2 (44 – 106) S55ac, S90ac and (R89me1);  
K57ac, S90ac and (R89me1);

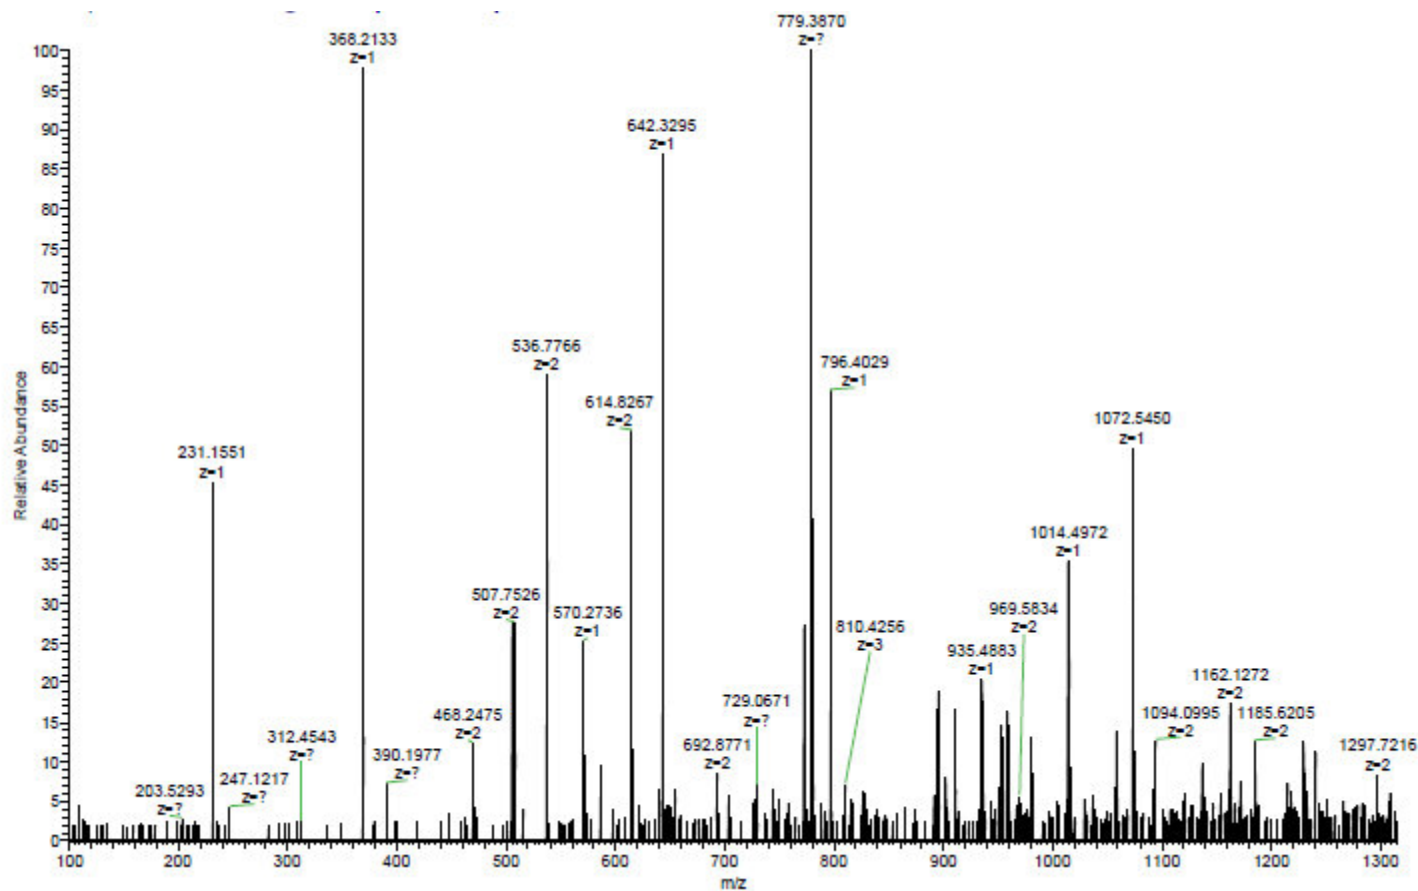



PRM2 (44 – 106) S55ac, S90ac and (R89me1);  
K57ac, S90ac and (R89me1);

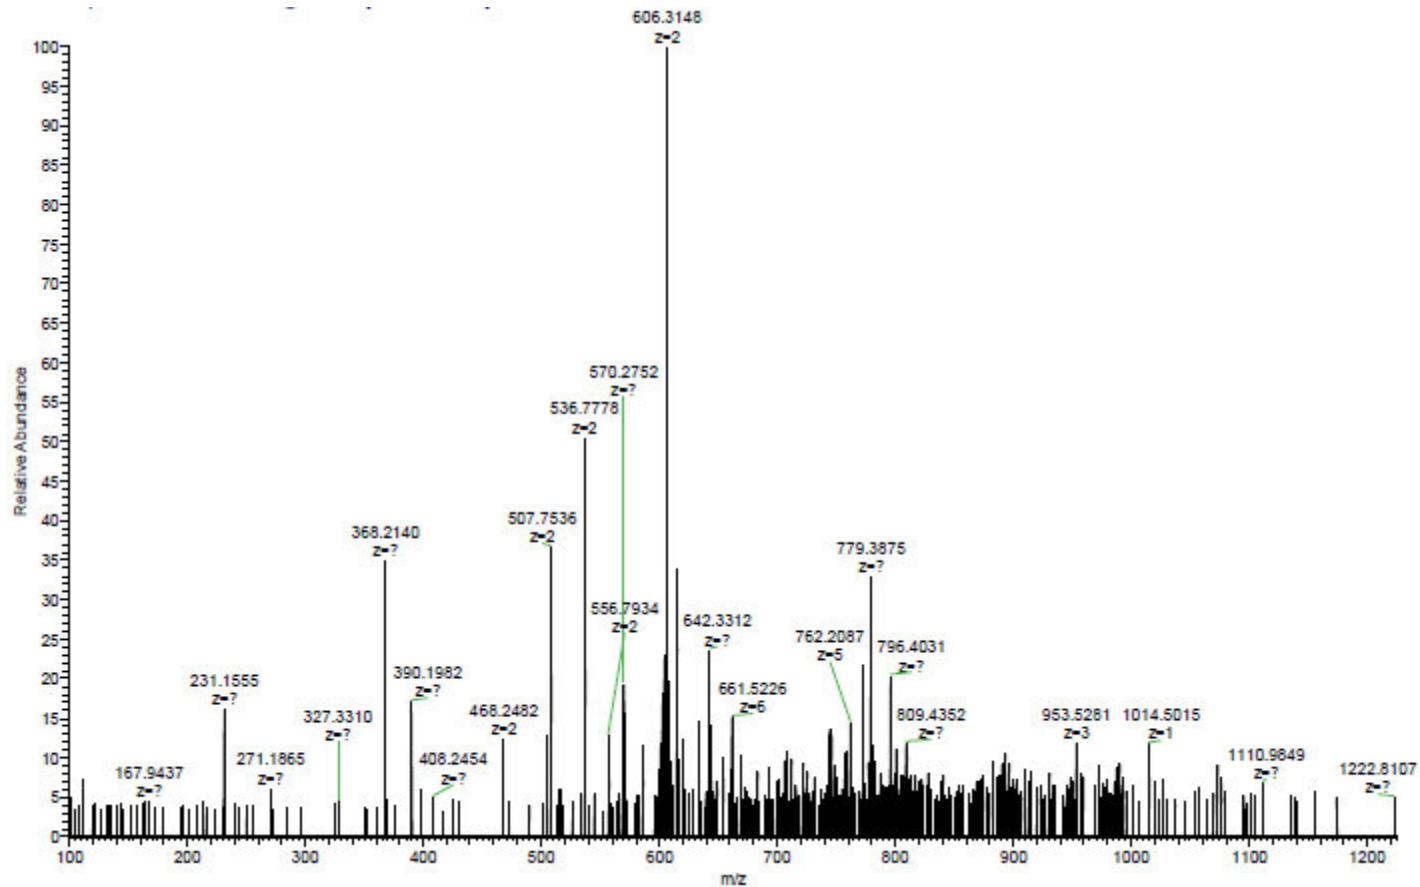

# PRM1 (2-51)

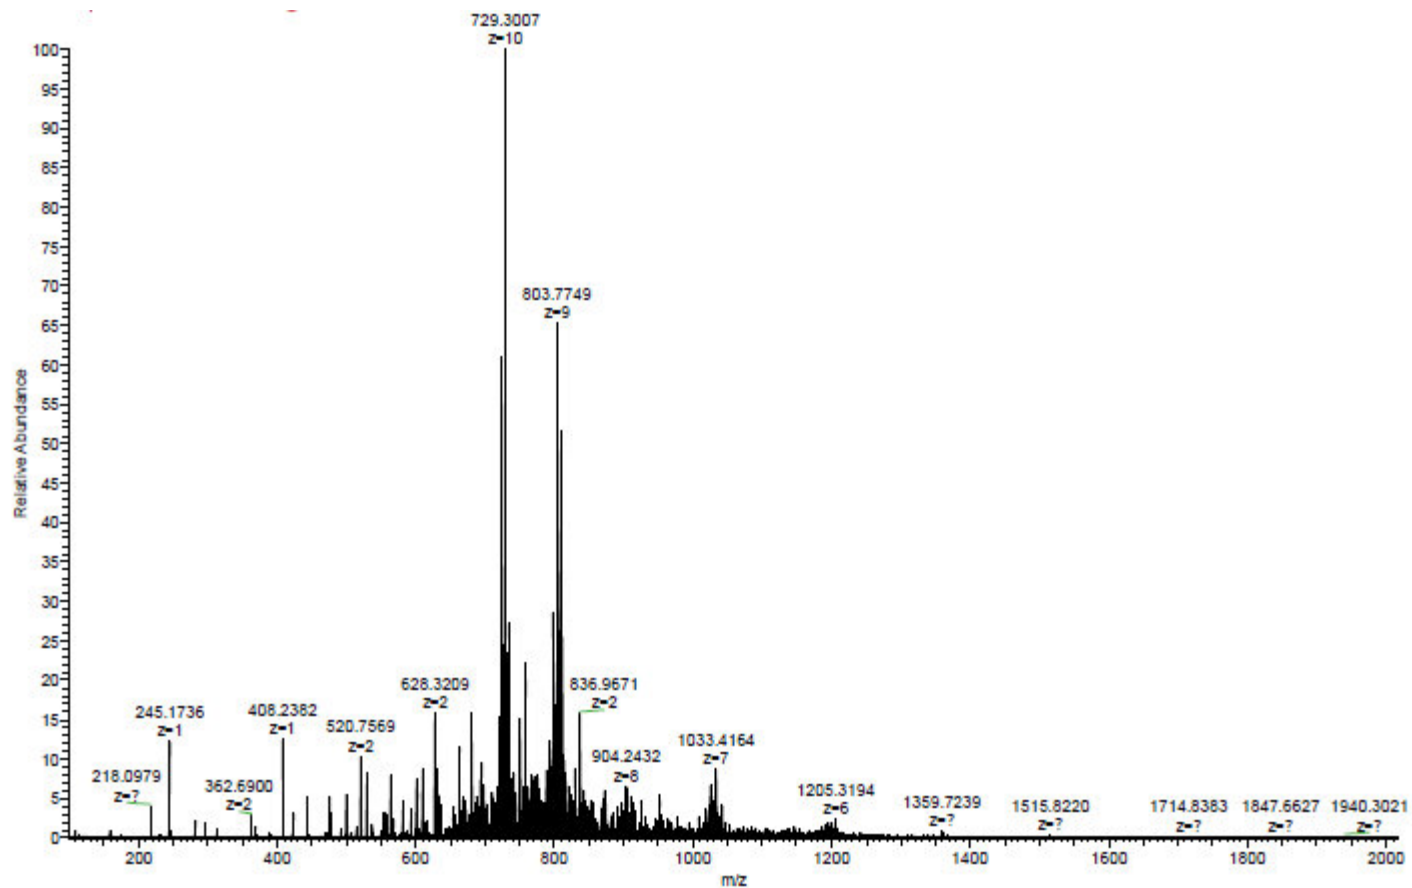

# PRM1 (2-51)

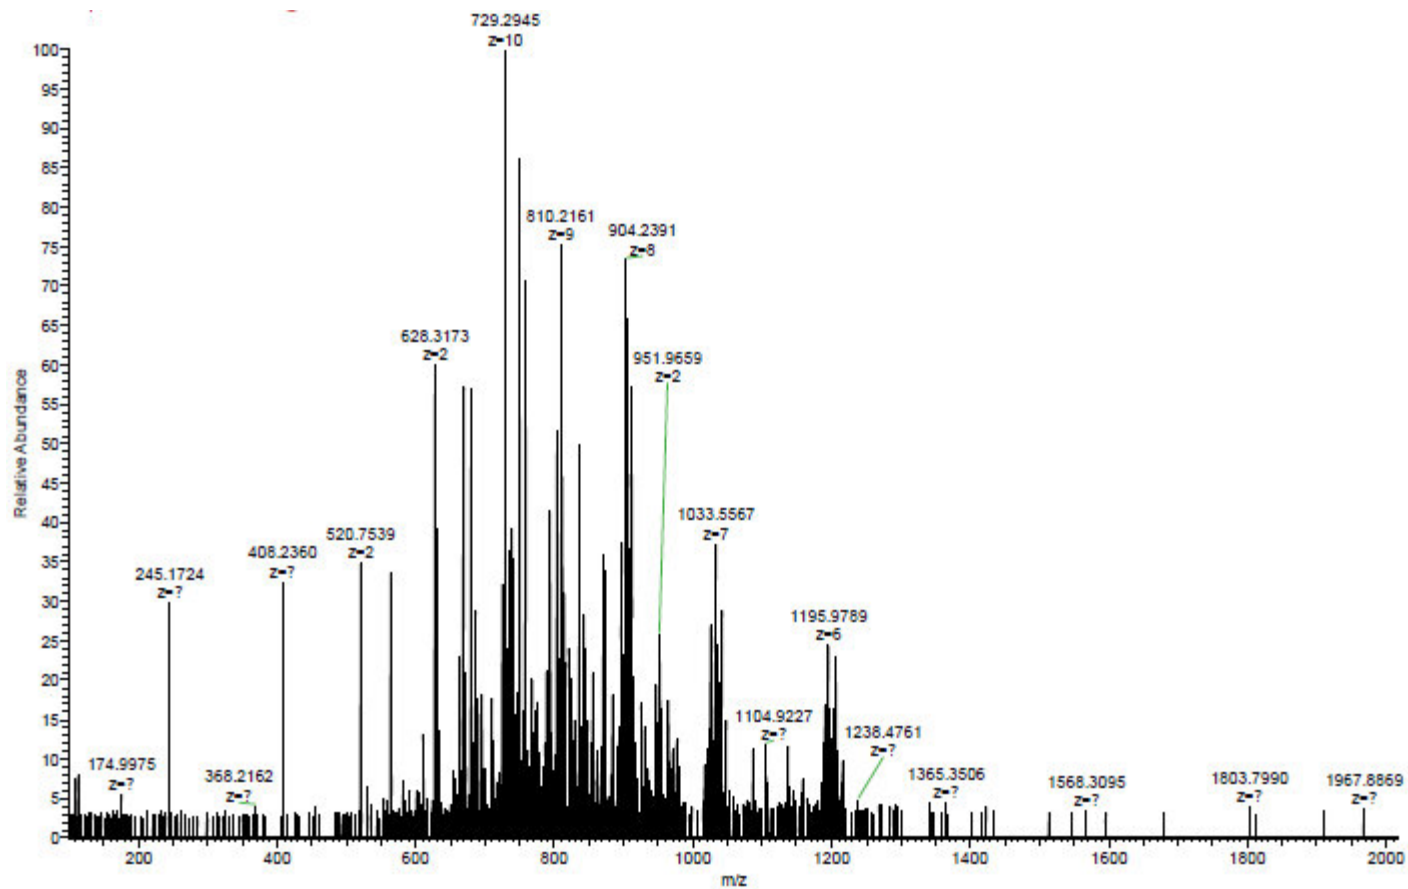

Supplement: 1756-8935-7-2-S5.pdf [file 1756-8935-7-2-S5.pdf]
